# Supplementary material for: Mechanistic Analysis and Kinetic Profiling of Soai’s Asymmetric Autocatalysis for Pyridyl and Pyrimidyl Substrates
Source: Research Square preprint supplement (doi:10.21203/rs.3.rs-5918778/v1), 2025-03-17
Supplement: Supplementary file 1 [file 290edcdacd5e3ff4fbf3332f.pdf]

# Supporting Information

## Mechanistic Analysis and Kinetic Profiling of Soai's Asymmetric Autocatalysis for Pyridyl and Pyrimidyl Substrates

Patrick Möhler,<sup>1</sup> Gloria Betzenbichler,<sup>1</sup> Laura Huber,<sup>1</sup> Alexander F. Siegle,<sup>1</sup> Oliver Trapp<sup>1,2,\*</sup>

### Affiliations:

<sup>1</sup>Department of Chemistry, Ludwig-Maximilians-University Munich, Munich, Germany.

<sup>2</sup>Max Planck Institute for Astronomy, Heidelberg, Germany.

\*Corresponding author: Email: [oliver.trapp@cup.uni-muenchen.de](mailto:oliver.trapp@cup.uni-muenchen.de)

## Content

|       |                                                                                             |    |
|-------|---------------------------------------------------------------------------------------------|----|
| 1     | Materials and Methods.....                                                                  | 5  |
| 1.1   | General .....                                                                               | 5  |
| 1.2   | NMR Spectroscopy .....                                                                      | 5  |
| 1.3   | Mass Spectrometry.....                                                                      | 5  |
| 1.4   | Preparative HPLC .....                                                                      | 5  |
| 1.5   | HPLC Analysis.....                                                                          | 6  |
| 2     | Synthetic Procedures .....                                                                  | 7  |
| 2.1   | 6-((Trimethylsilyl)ethynyl)nicotinaldehyde ( <b>TMSPyr-CHO</b> ).....                       | 7  |
| 2.2   | 2-Methyl-(6-((trimethylsilyl)ethynyl)pyridine-3-yl)propanol ( <b>TMSPyr-OH</b> ).....       | 7  |
| 2.3   | 5-Bromo-2-((trimethylsilyl)ethynyl)pyrimidine ( <b>TMSPym-Br</b> ) .....                    | 8  |
| 2.4   | 2-(Ethynyltrimethylsilane)-pyrimidine-5-carbaldehyde ( <b>TMSPym-CHO</b> ).....             | 9  |
| 2.5   | 2-Methyl-((2-trimethylsilylalkynyl)-5-pyrimidinyl)propanol ( <b>TMSPym-OH</b> ) .....       | 9  |
| 2.6   | Ethynyl Adamantane .....                                                                    | 10 |
| 2.7   | 6-((Adamantan-1-yl)ethynyl)nicotinaldehyde ( <b>AdPyr-CHO</b> ) .....                       | 11 |
| 2.8   | 1-(6-((Adamantan-1-yl)ethynyl)pyridin-3-yl)-2-methylpropan-1-ol ( <b>AdPyr-OH</b> ) .....   | 11 |
| 2.9   | 5-Bromo-2-((adamantyl)ethynyl)pyrimidine ( <b>AdPym-Br</b> ) .....                          | 12 |
| 2.10  | 2-(Ethynyl-adamantyl)-pyrimidine-5-carbaldehyde ( <b>AdPym-CHO</b> ) .....                  | 13 |
| 2.11  | 1-(2-((Adamantan-1-yl)ethynyl)pyrimidin-5-yl)-2-methylpropan-1-ol ( <b>AdPym-OH</b> ) ..... | 13 |
| 3     | <i>In situ</i> Reaction – High-Resolution MS measurements.....                              | 15 |
| 3.1   | General procedure for Orbitrap <i>In situ</i> High-resolution MS measurements .....         | 15 |
| 3.2   | Time resolved tracking of substrate aldehyde, product alcohol and zinc hemiacetal.....      | 15 |
| 3.3   | Identification of Reaction Intermediates .....                                              | 17 |
| 3.3.1 | Intermediates of the TMSPyr autocatalytic system.....                                       | 17 |
| 3.3.2 | Intermediates of the AdPyr autocatalytic system .....                                       | 27 |
| 3.3.3 | Intermediates of the TMSPym autocatalytic system .....                                      | 31 |
| 3.3.4 | Intermediates of the AdPym autocatalytic system.....                                        | 37 |
| 4     | Kinetic Investigations .....                                                                | 40 |
| 4.1   | General procedure for flow injection analysis (FIA) HPLC measurements.....                  | 40 |
| 4.2   | TMSPyr-CHO/TMSPyr-OH System .....                                                           | 41 |
| 4.2.1 | Calibration plots for quantitative analysis of kinetic measurements .....                   | 41 |
| 4.2.2 | Variation of the TMSPyr-CHO concentration.....                                              | 42 |
| 4.2.3 | Variation of the TMSPyr-OH concentration.....                                               | 47 |
| 4.2.4 | Determination of the Reaction Orders .....                                                  | 51 |
| 4.3   | AdPyr-CHO/AdPyr-OH System.....                                                              | 52 |
| 4.3.1 | Calibration plots for quantitative analysis of kinetic measurements .....                   | 52 |

|       |                                                                                                                                                                                                                                                                                             |                                           |
|-------|---------------------------------------------------------------------------------------------------------------------------------------------------------------------------------------------------------------------------------------------------------------------------------------------|-------------------------------------------|
| 4.3.2 | Variation of the AdPyr-CHO concentration.....                                                                                                                                                                                                                                               | 53                                        |
| 4.3.3 | Variation of the AdPyr-OH concentration.....                                                                                                                                                                                                                                                | 58                                        |
| 4.3.4 | Determination of the Reaction Orders .....                                                                                                                                                                                                                                                  | 62                                        |
| 4.4   | AdPym-CHO/AdPym-OH System .....                                                                                                                                                                                                                                                             | 63                                        |
| 4.4.1 | Calibration plots for quantitative analysis of kinetic measurements .....                                                                                                                                                                                                                   | 63                                        |
| 4.4.2 | Variation of the AdPym-CHO concentration.....                                                                                                                                                                                                                                               | 64                                        |
| 4.4.3 | Variation of the AdPym-OH concentration.....                                                                                                                                                                                                                                                | 69                                        |
| 4.4.4 | Determination of the Reaction Orders .....                                                                                                                                                                                                                                                  | 72                                        |
| 4.5   | TMSPym-CHO/TMSPym-OH System.....                                                                                                                                                                                                                                                            | 73                                        |
| 4.5.1 | Calibration plots for quantitative analysis of kinetic measurements .....                                                                                                                                                                                                                   | 73                                        |
| 4.5.2 | Variation of the TMSPym-CHO concentration .....                                                                                                                                                                                                                                             | 74                                        |
| 4.5.3 | Variation of the TMSPym-OH concentration .....                                                                                                                                                                                                                                              | 78                                        |
| 4.5.4 | Determination of the Reaction Orders .....                                                                                                                                                                                                                                                  | 81                                        |
| 5     | Dynamic HPLC measurements of hemiacetal formation .....                                                                                                                                                                                                                                     | 82                                        |
| 5.1   | Enantioselective dynamic HPLC measurements .....                                                                                                                                                                                                                                            | 82                                        |
| 5.2   | Evaluation of the dynamic HPLC profiles.....                                                                                                                                                                                                                                                | 82                                        |
| 5.3   | DHPLC measurements of Soai aldehyde TMSPyr-CHO.....                                                                                                                                                                                                                                         | 83                                        |
| 5.4   | DHPLC measurements of <i>Soai</i> aldehyde TMSPym-CHO.....                                                                                                                                                                                                                                  | 84                                        |
| 5.5   | DHPLC measurements of <i>Soai</i> aldehyde AdPyr-CHO .....                                                                                                                                                                                                                                  | 85                                        |
| 5.6   | DHPLC measurements of <i>Soai</i> aldehyde AdPym-CHO.....                                                                                                                                                                                                                                   | 86                                        |
| 6     | Kinetic Analysis and Simulation of Reaction Profiles .....                                                                                                                                                                                                                                  | 87                                        |
| 6.1   | Reaction Rates of the Side Reaction.....                                                                                                                                                                                                                                                    | 87                                        |
| 6.2   | Mechanistic Model and Algorithm for the Kinetic Analysis of the Soai Reaction .....                                                                                                                                                                                                         | 91                                        |
| 6.3   | Determination of the reaction rate constants .....                                                                                                                                                                                                                                          | <b>Fehler! Textmarke nicht definiert.</b> |
| 6.4   | Simulation of concentration-time profiles .....                                                                                                                                                                                                                                             | 98                                        |
| 6.4.1 | Simulation of the Variation of 2-( <i>tert</i> -butylacetylene-1-yl)pyrimidyl-5-carbaldehyde 4 from 10.6 mmol/L to 41 mmol/L (1.3 mmol/L ( <i>R</i> )-2-( <i>tert</i> -butylacetylene-1-yl)pyrimidyl-5-( <i>iso</i> -butan-1-ol) (ee 99.9%), 40 mmol/L Zn( <i>i</i> Pr) <sub>2</sub> )..... | <b>Fehler! Textmarke nicht definiert.</b> |
| 6.4.2 | Simulation of the Variation of ( <i>R</i> )-2-( <i>tert</i> -Butylacetylene-1-yl)pyrimidyl-5-( <i>iso</i> -butan-1-ol) (ee 99.9%) from 0.266 mmol/L to 4 mmol/L (26.1 mmol/L 2-( <i>tert</i> -Butylacetylene-1-yl)pyrimidyl-5-carbaldehyde, 40 mmol/L Zn( <i>i</i> Pr) <sub>2</sub> ) ..... | <b>Fehler! Textmarke nicht definiert.</b> |
| 6.4.3 | Simulation of the Variation of Zn( <i>i</i> Pr) <sub>2</sub> from 30 mmol/L to 130 mmol/L (26.1 mmol/L 2-( <i>tert</i> -Butylacetylene-1-yl)pyrimidyl-5-carbaldehyde, 1.3 mmol/L ( <i>R</i> )-2-( <i>tert</i> -Butylacetylene-1-yl)pyrimidyl-5-( <i>iso</i> -butan-1-ol) (ee 99.9%)).....   | <b>Fehler! Textmarke nicht definiert.</b> |
| 6.5   | Simulation of amplification of the enantiomeric excess ee .....                                                                                                                                                                                                                             | <b>Fehler! Textmarke nicht definiert.</b> |
| 6.6   | Systematic variation of the starting enantiomeric excess ee.....                                                                                                                                                                                                                            | <b>Fehler! Textmarke nicht definiert.</b> |

|        |                                                                                                           |                                       |
|--------|-----------------------------------------------------------------------------------------------------------|---------------------------------------|
| 6.6.1  | EE 0.1%.....                                                                                              | Fehler! Textmarke nicht definiert.    |
| 6.6.2  | EE 1%.....                                                                                                | Fehler! Textmarke nicht definiert.    |
| 6.6.3  | EE 5%.....                                                                                                | Fehler! Textmarke nicht definiert.    |
| 6.6.4  | EE 10%.....                                                                                               | Fehler! Textmarke nicht definiert.    |
| 6.6.5  | EE 25%.....                                                                                               | Fehler! Textmarke nicht definiert.    |
| 6.6.6  | EE 50%.....                                                                                               | Fehler! Textmarke nicht definiert.    |
| 6.6.7  | EE 75%.....                                                                                               | Fehler! Textmarke nicht definiert.    |
| 6.6.8  | EE 90%.....                                                                                               | Fehler! Textmarke nicht definiert.    |
| 6.6.9  | EE 95%.....                                                                                               | Fehler! Textmarke nicht definiert.    |
| 6.6.10 | EE 99%.....                                                                                               | Fehler! Textmarke nicht definiert.    |
| 6.7    | Simulation of the ee amplification by propagation through a reaction mixture .....                        | Fehler!<br>Textmarke nicht definiert. |
| 6.8    | Comparison of experimentally observed ee values and predicted ee values by simulation<br>with Soai 7..... | Fehler! Textmarke nicht definiert.    |
| 7      | NMR Spectra .....                                                                                         | 136                                   |
| 8      | References .....                                                                                          | 146                                   |

## 1 Materials and Methods

### 1.1 General

All reactions involving the use of moisture and/or oxygen sensitive substances were carried out in glassware, previously dried with a heat-gun under argon atmosphere, using standard *Schlenk* techniques. Syringes were used to transfer solvents or reagents and purged three times with argon prior to use. All reagents were obtained from *Sigma-Aldrich* and *abcr* and were used without further purification. The dry solvents toluene and THF were taken from the solvent purification system MB SPS-800 and stored under argon.

### 1.2 NMR Spectroscopy

NMR spectra were recorded on a *Bruker AVIII HD400* and a *Varian vnmrs* spectrometer. Chemical shifts are reported as  $\delta$ -values in ppm referenced to the residual solvent peak.<sup>[1]</sup> For the characterization of the observed signal multiplicities the following abbreviations were used: m (multiplet), s (singlet), d (doublet), t (triplet), p (pentet), dd (doublet of doublet) and dt (doublet of triplet).

### 1.3 Mass Spectrometry

High-resolution mass spectrometry was performed using flow injection analysis (FIA/ESI) with a *Surveyor* MS pump at a flow rate of 100  $\mu$ L/min with acetonitrile/water as the running agent. Each 1-10  $\mu$ L sample solution was injected using an inline filter. EI spectra were recorded on *Finnigan MAT 95Q* or *Finnigan MAT 90* instruments for electron impact ionization (EI). *In situ* mass spectrometric studies were performed using a *Q Exactive Plus* Orbitrap mass spectrometer (*Thermo Scientific*).

### 1.4 Preparative HPLC

Preparative separations were performed on an *Agilent 1260 Infinity* HPLC. Achiral stationary phases were purchased from *Chiral Technologies*. The HPLC-grade solvents were obtained from *Sigma-Aldrich*.

The enantiomers of the racemic TMS pyridine alcohol **TMSPyr-OH** were separated using a Chiralpak® IG-3 column (250 mm, i.D. 20 mm, particle size: 5  $\mu$ m) and *n*-hexane/*i*PrOH = 90/10 at a flow rate of 18.9 mL/min.

The enantiomers of the racemic TMS pyrimidine alcohol **TMSPym-OH** were separated using a Chiralpak® IB column (250 mm, i.D. 20 mm, particle size: 5  $\mu$ m) and *n*-hexane/*i*PrOH = 95/5 at a flow rate of 18.9 mL/min.

The enantiomers of the racemic adamantyl pyridine alcohol **AdPyr-OH** were separated using a Chiralpak® IC column (250 mm, i.D. 20 mm, particle size: 5 µm) and *n*-hexane/*i*PrOH = 75/25 at a flow rate of 18.9 mL/min.

The enantiomers of the racemic adamantyl pyrimidine alcohol **AdPym-OH** were separated using a Chiralpak® IB column (250 mm, i.D. 20 mm, particle size: 5 µm) and *n*-hexane/*i*PrOH = 75/25 at a flow rate of 18.9 mL/min.

### 1.5 HPLC Analysis

HPLC and HPLC-MS measurements were performed on an *Agilent 1200 Infinity* HPLC device equipped with a photodiode array detector (DAD) and a 6120 quadrupole mass spectrometer (APCI). The kinetic measurements of the *Soai* reaction were performed using the Flow Injection Analysis (FIA) method.

## 2 Synthetic Procedures

### 2.1 6-((Trimethylsilyl)ethynyl)nicotinaldehyde (**TMSPyr-CHO**)

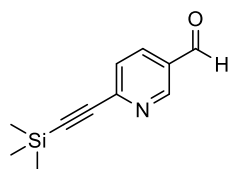

This synthesis is a modification of a reported procedure.<sup>[2]</sup> 6-Bromo-pyridine-3-carboxaldehyde (1.86 g, 10.0 mmol, 1.00 equiv.), Pd(PPh<sub>3</sub>)<sub>4</sub> (231 mg, 0.50 mmol, 5 mol%) and CuI (95.2 mg, 531 μmol, 5 mol%) were dissolved in degassed THF (25 mL). The mixture was cooled in an ice bath and *N,N*-diisopropylethylamine (6.80 mL, 40.0 mmol, 4.00 equiv.) was added. After the mixture was stirred at 0 °C for 5 min, trimethylsilylacetylene (1.52 mg, 11.0 mmol, 1.10 equiv.) was added dropwise. The ice bath was removed after 1 h and the mixture was stirred at room temperature for 6 h. Afterwards, the reaction mixture was filtered through Celite. The solvents were removed under reduced pressure. Purification of the crude material was achieved by sublimation (0.015 mbar, 65-70 °C) to obtain **TMSPyr-CHO** as a white crystalline solid (1.36 g, 6.70 mmol, 77%).

<sup>1</sup>H-NMR (CDCl<sub>3</sub>, 400 MHz): δ [ppm] = 10.10 (d, J = 0.5 Hz, 1H), 9.02 (dd, J = 2.2, 0.9 Hz, 1H), 8.12 (dd, J = 8.1, 2.1 Hz, 1H), 7.60 (dt, J = 8.1, 0.8 Hz, 1H), 0.29 (s, 9H).

<sup>13</sup>C-NMR (CDCl<sub>3</sub>, 400 MHz): δ [ppm] = 189.3, 152.2, 147.9, 135.5, 130.9, 127.6, 103.6, 100.1, 0.5.

HR-MS (EI): m/z calc. for C<sub>11</sub>H<sub>13</sub>NOSi: 203.0766; found: 188.0524.

### 2.2 2-Methyl-(6-((trimethylsilyl)ethynyl)pyridine-3-yl)propanol (**TMSPyr-OH**)

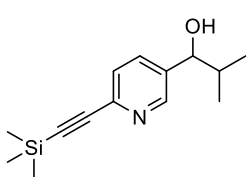

This synthesis is a modification of a reported procedure.<sup>[3]</sup> **TMSPyr-CHO** (1.08 g, 5.31 mmol, 1.00 equiv.) was dissolved in dry THF (50 mL). The solution was cooled to 0 °C and *i*PrMgCl solution (1.88 M in diethyl ether, 3.39 mL, 6.37 mmol, 1.20 equiv.) was added dropwise. The reaction mixture was stirred at room temperature for 2 h and quenched by the addition of saturated NH<sub>4</sub>Cl solution (20 mL). The mixture was diluted with water (50 mL) and stirred for a further 10 min. The aqueous and organic layers were separated and the aqueous layer was extracted with ethyl acetate (3x 50 mL). The combined organic layers were dried over Na<sub>2</sub>SO<sub>4</sub>, filtrated and the solvents were removed under reduced pressure. The crude product was purified *via* column chromatography (pentane/acetone, 90/10) to yield the product **TMSPyr-OH** (0.72 g, 2.91 mmol, 55%) as an orange oil which solidified over time.

**<sup>1</sup>H-NMR (CDCl<sub>3</sub>, 400 MHz):** δ [ppm] = 8.48 (dt, J = 2.2, 0.7 Hz, 1H), 7.66 (ddd, J = 8.0, 2.2, 0.6 Hz, 1H), 7.45 (dd, J = 8.1, 0.8 Hz, 1H), 4.48 (d, J = 6.3 Hz, 1H), 1.95 (m, 1H), 0.95 (d, J = 6.7 Hz, 3H), 0.83 (d, J = 6.8 Hz, 3H), 0.27 (s, 9H).

**<sup>13</sup>C-NMR (CDCl<sub>3</sub>, 151 MHz):** δ [ppm] = 148.1, 141.5, 138.6, 134.6, 126.9, 103.1, 95.5, 77.0, 35.3, 18.6, 17.6, -0.3.

**HR-MS (EI):** m/z calc. for C<sub>14</sub>H<sub>21</sub>NOSi: 247.1392, found: 248.1463 [M+H]<sup>+</sup>.

### 2.3 5-Bromo-2-((trimethylsilyl)ethynyl)pyrimidine (**TMSPym-Br**)

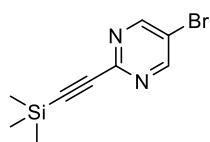

This synthesis is a modification of a reported procedure.<sup>[4]</sup> Diisopropylamine (7.73 mL, 54.8 mmol, 4.00 equiv.), CuI (156 mg, 0.82 mmol, 6 mol%), Pd(PPh<sub>3</sub>)<sub>4</sub> (475 mg, 0.41 mmol, 3 mol%) and 5-bromo-2-iodo-pyrimidine **6** (3.90 g, 13.7 mmol, 1.00 equiv.) were dissolved in degassed THF (60 mL). The mixture was cooled to 0 °C before dropwise adding trimethylsilylacetylene (2.10 mL, 15.1 mmol, 1.10 equiv.). After 30 min the ice bath was removed and the reaction mixture was stirred at room temperature for 15 h. The reaction mixture was diluted with diethyl ether (100 mL), filtered through Celite and rewash with diethyl ether (100 mL). After removal of the solvents under reduced pressure, the crude product was purified *via* flash column chromatography (cyclohexane/ethyl acetate, 33/1) to give compound **TMSPym-Br** as a white solid (2.94 g, 11.5 mmol, 84%).

**<sup>1</sup>H-NMR (CDCl<sub>3</sub>, 400 MHz):** δ [ppm] = 8.75 (s, 2H), 0.29 (s, 9H).

**<sup>13</sup>C-NMR (CDCl<sub>3</sub>, 151 MHz):** δ [ppm] = 157.9, 150.2, 119.5, 101.3, 96.2, -0.5.

**HR-MS (EI):** m/z calc. for C<sub>9</sub>H<sub>11</sub>BrN<sub>2</sub>Si: 253.9875, found: 253.9869.



## 2.4 2-(Ethynyltrimethylsilane)-pyrimidine-5-carbaldehyde (**TMSPym-CHO**)

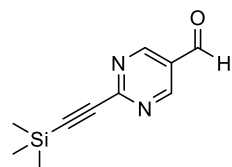

This synthesis is a modification of a reported procedure.<sup>[5]</sup> **TMSPym-Br** (1.02 g, 4.00 mmol, 1.00 equiv.) was dissolved in dry THF (40 mL). Ethyl formate (0.48 mL, 6.00 mmol, 1.50 equiv.) was added at  $-78^{\circ}\text{C}$ . After 5 min, *n*BuLi (1.90 M in hexane, 3.16 mL, 6.00 mmol, 1.50 equiv.) was added dropwise. The mixture was stirred for 5 min and subsequently quenched by the addition of conc. acetic acid (0.35 mL). The mixture was warmed to room temperature and saturated  $\text{Na}_2\text{CO}_3$  solution (20 mL) was added. The aqueous and organic layers were separated and the aqueous layer was extracted with  $\text{CH}_2\text{Cl}_2$  (3x 25 mL). The solvents were removed under reduced pressure and the obtained crude material was purified *via* column chromatography (cyclohexane/ethyl acetate, 10/1). **TMSPym-CHO** was obtained as a beige solid (363 mg, 1.76 mmol, 45%).

**$^1\text{H-NMR}$  ( $\text{CDCl}_3$ , 400 MHz):**  $\delta$  [ppm] = 10.14 (s, 1H), 9.14 (s, 2H), 0.32 (s, 9H).

**$^{13}\text{C-NMR}$  ( $\text{CDCl}_3$ , 151 MHz):**  $\delta$  [ppm] = 188.3, 158.4, 155.4, 126.7, 102.0, 100.0, -0.5.

**HR-MS (EI):**  $m/z$  calc. for  $\text{C}_{10}\text{H}_{12}\text{ON}_2\text{Si}$ : 204.0719, found: 204.0718.

## 2.5 2-Methyl-((2-trimethylsilylalkynyl)-5-pyrimidinyl)propanol (**TMSPym-OH**)

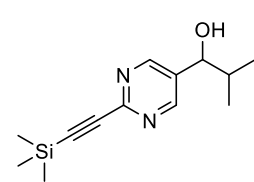

This synthesis is a modification of a reported procedure.<sup>[4]</sup> **TMSPym-Br** (1.02 g, 4.00 mmol, 1.00 equiv.) was dissolved in dry THF (30 mL). The mixture was cooled to  $-97^{\circ}\text{C}$  ( $\text{MeOH}/\text{N}_2$ ) and *n*BuLi (1.5 M in hexane, 2.93 mL, 4.40 mmol, 1.10 equiv.) was added dropwise. After the addition, the mixture was stirred at  $-97^{\circ}\text{C}$  for 10 min before dropwise adding isobutyraldehyde (0.44 mL, 4.80 mmol, 1.20 equiv.) and stirring at  $-97^{\circ}\text{C}$  for a further 30 min. The reaction was quenched by adding HCl (2 M in  $\text{Et}_2\text{O}$ , 2.00 mL, 4.00 mmol, 1.00 equiv.). Afterwards, saturated  $\text{Na}_2\text{CO}_3$  solution (5 mL) was added. The aqueous layer was separated from the organic layer and extracted with ethyl acetate (3x 25 mL). The combined organic layers were dried over  $\text{Na}_2\text{SO}_4$ , filtrated and the solvents were removed under reduced pressure. Purification of the crude product was performed by column chromatography using a  $\text{CH}_2\text{Cl}_2$ /ethyl acetate solvent gradient (40/1 - 30/1 - 20/1 - 10/1). The product **TMSPym-OH** was obtained as yellow oil which solidified over time (0.23 g, 0.91 mmol, 23%).

**<sup>1</sup>H-NMR (CDCl<sub>3</sub>, 400 MHz):** δ [ppm] = 8.66 (s, 2H), 4.54 (d, J = 5.9 Hz, 1H), 2.03 – 1.94 (m, 1H), 0.95 (d, J = 6.7 Hz, 3H), 0.89 (d, J = 6.8 Hz, 3H), 0.29 (s, 9H).

**<sup>13</sup>C-NMR (CDCl<sub>3</sub>, 151 MHz):** δ [ppm] = 155.6, 134.8, 75.3, 35.2, 18.4, 17.2, -0.4.

**HR-MS (EI):** m/z calc. for C<sub>13</sub>H<sub>20</sub>N<sub>2</sub>OSi: 248.1345, found: 248.1339.

## 2.6 Ethinyl Adamantane

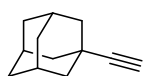

This synthesis is a modification of a reported procedure.<sup>[6]</sup> A LDA solution (1.00 M in THF, 15.0mL, 15.0 mmol, 1.00 equiv.) was cooled to –78 °C and a solution of adamantyl methyl ketone (2.67 g, 15.0 mmol, 1.00 equiv.) in dry THF (7 mL) was added dropwise. After stirring for 1 h, chloro diethyl phosphate (2.16 mL, 15.0 mmol, 1.00 equiv.) was added dropwise and the reaction mixture was allowed to warm to room temperature. After stirring for 3 h, this mixture was added dropwise to a second LDA solution (1.00 M in THF, 30.0 mL, 30.0 mmol, 2.00 equiv.) at –78 °C. The solution was stirred at room temperature for 15 h. The reaction was quenched by the addition of water (50 mL). After separating the organic and aqueous layers, the aqueous layer was extracted with pentane (3x 50 mL). The combined organic extracts were washed with ice-cold aqueous HCl (1M, 2x 70 mL) and saturated NaHCO<sub>3</sub> solution (100 mL). After drying over Na<sub>2</sub>SO<sub>4</sub> and filtration through Celite, the solvents were removed under reduced pressure. Purification was achieved by flash column chromatography (cyclohexane/ethyl acetate, 10/1). Ethinyl adamantane was obtained as white solid (1.97 g, 12.3 mmol, 82%).

**<sup>1</sup>H-NMR (CDCl<sub>3</sub>, 400 MHz):** δ [ppm] = 2.10 (s, 1H), 1.96 (t, J = 3.2 Hz, 3H), 1.89 (d, J = 2.9 Hz, 6H), 1.69 (t, J = 3.2 Hz, 6H).

**<sup>13</sup>C-NMR (CDCl<sub>3</sub>, 151 MHz):** δ [ppm] = 93.2, 66.7, 42.8, 36.4, 29.5, 28.0.

**HR-MS (EI):** m/z calc. for C<sub>12</sub>H<sub>16</sub>: 160.1252, found: 160.1245.

## 2.7 6-((Adamantan-1-yl)ethynyl)nicotinaldehyde (**AdPyr-CHO**)

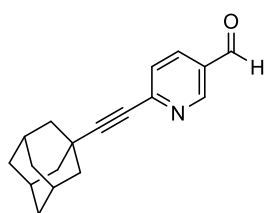

This synthesis is a modification of a reported procedure.<sup>[2]</sup> Ethynyl adamantane (1.06 g, 6.60 mmol, 1.10 equiv.) was dissolved in degassed THF (5 mL). In a separate *Schlenk* flask, 6-bromonicotinaldehyde (1.12 g, 6.00 mmol, 1.00 equiv.), CuI (57.1 mg, 300  $\mu$ mol, 5 mol%) and Pd(PPh<sub>3</sub>)<sub>4</sub> (13 mg, 120  $\mu$ mol, 0.02 equiv.) were dissolved in dry THF (50 mL). Diisopropylamine (3.20 mL, 24.0 mmol, 4.00 equiv.) was added and the mixture was degassed by freeze-pump thaw (liquid N<sub>2</sub>, 3 times). The mixture was cooled to 0 °C, and the ethynyl adamantane solution was added. After stirring at room temperature for 24 h, the reaction mixture was filtered through Celite. After removal of the solvents under reduced pressure, the crude material was purified *via* column chromatography (cyclohexane/ethyl acetate, 10/1) to yield compound **AdPyr-CHO** as a white solid (1.32 g, 4.98 mmol, 83%).

**<sup>1</sup>H-NMR (CDCl<sub>3</sub>, 400 MHz):**  $\delta$  [ppm] = 10.08 (s, 1H), 8.99 (d, *J* = 2.2 Hz, 1H), 8.10 (dd, *J* = 8.1, 2.1 Hz, 1H), 7.52 (d, *J* = 8.1 Hz, 1H), 2.01 (d, *J* = 1.3 Hz, 10H), 1.73 (d, *J* = 2.4 Hz, 6H).

**<sup>13</sup>C-NMR (CDCl<sub>3</sub>, 151 MHz):**  $\delta$  [ppm] = 197.4, 189.8, 151.9, 135.8, 129.5, 127.3, 77.3, 77.0, 76.7, 42.1, 36.2, 30.3, 27.7.

**HR-MS (EI):** *m/z* calc. for C<sub>18</sub>H<sub>19</sub>NO: 265.1467, found: 265.1462.

## 2.8 1-(6-((Adamantan-1-yl)ethynyl)pyridin-3-yl)-2-methylpropan-1-ol (**AdPyr-OH**)

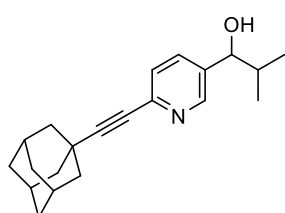

This synthesis is a modification of a reported procedure.<sup>[3]</sup> **AdPyr-CHO** (796 mg, 3.00 mmol, 1.00 equiv.) was dissolved in dry THF (30 mL). The solution was cooled to 0 °C before dropwise adding *i*PrMgCl solution (2.00 M in diethyl ether, 1.80 mL, 3.60 mmol, 1.20 equiv.). The mixture was stirred at room temperature for 2 h before quenching the reaction with saturated NH<sub>4</sub>Cl solution (15 mL). The mixture was diluted with water (30 mL) and stirred for a further 10 min. The aqueous and organic layers were separated and the aqueous layer was extracted with ethyl acetate (3x 30 mL). The solvents were removed under reduced pressure. The obtained crude material was purified by column chromatography (cyclohexane/ethyl acetate, 2/1) to yield compound **AdPyr/OH** as orange solid (433 mg, 1.39 mmol, 46%).

**<sup>1</sup>H-NMR (CDCl<sub>3</sub>, 600 MHz):** δ [ppm] = 8.45 (d, J = 2.2 Hz, 1H), 7.63 (dd, J = 8.1, 2.2 Hz, 1H), 7.37 (d, J = 8.0 Hz, 1H), 4.46 (d, J = 6.4 Hz, 1H), 2.04 (s, 6H), 1.99 (s, 9H), 1.97 – 1.92 (m, 1H), 0.95 (d, J = 6.7 Hz, 3H), 0.82 (d, J = 6.8 Hz, 3H).

**<sup>13</sup>C-NMR (CDCl<sub>3</sub>, 151 MHz):** δ [ppm] = 147.9, 142.5, 137.9, 134.7, 126.7, 99.2, 78.8, 77.1, 42.4, 36.4, 35.3, 30.1, 27.9, 18.7, 17.9.

**HR-MS (ESI):** m/z calc. for C<sub>21</sub>H<sub>27</sub>NO: 309.2093, found: 309.2086.

## 2.9 5-Bromo-2-((adamantyl)ethynyl)pyrimidine (**AdPym-Br**)

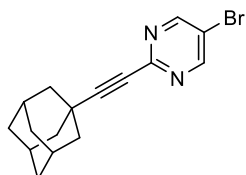

This synthesis is a modification of a reported procedure.<sup>[4]</sup> 5-Bromo-2-iodopyrimidine (1.20 g, 4.23 mmol, 1.00 equiv.), CuI (32.2 mg, 0.17 mmol, 4 mol%) and Pd(PPh<sub>3</sub>)<sub>4</sub> (97.7 mg, 84.5 μmol, 2 mol%) were dissolved in degassed THF (18 mL). To this mixture, diisopropylamine (2.39 mL, 16.9 mmol, 4.00 equiv.) and ethynyl adamantane (745 mg, 4.65 mmol, 1.10 equiv.) were added at 0 °C. Afterwards, the reaction mixture was stirred at room temperature for 48 h, filtered through Celite and the solvents were removed under reduced pressure. Purification of the crude product was achieved *via* column chromatography (cyclohexane/ ethyl acetate, 50/1) to yield the product **AdPym-Br** as a white solid (1.32 g, 4.16 mmol, 90%).

**<sup>1</sup>H-NMR (CDCl<sub>3</sub>, 600 MHz):** δ [ppm] = 8.72 (s, 2H), 2.01 (s, 9H), 1.72 (s, 6H).

**<sup>13</sup>C-NMR (CDCl<sub>3</sub>, 151 MHz):** δ [ppm] = 157.9, 151.4, 118.6, 99.3, 78.3, 42.0, 36.3, 30.2, 27.8.

**HR-MS (EI):** m/z calc. for C<sub>16</sub>H<sub>17</sub>N<sub>2</sub>Br: 316.0575, found: 316.0563.

## 2.10 2-(Ethynyl-adamantyl)-pyrimidine-5-carbaldehyde (**AdPym-CHO**)

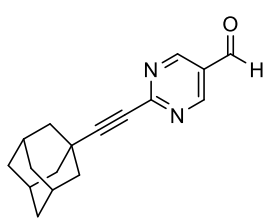

This synthesis is a modification of a reported procedure.<sup>[5]</sup> **AdPym-Br** (700 mg, 2.21 mmol, 1.00 equiv.) was dissolved in dry THF (20 mL). The solution was cooled to  $-78^{\circ}\text{C}$  and ethyl formate (0.27 mL, 3.31 mmol, 1.5 equiv.) was added and the mixture was stirred for 3 min. Afterwards, *n*BuLi (2.5 M in hexane, 1.32 mL, 3.31 mmol, 1.50 equiv.) was added over 10 min and the mixture was stirred at  $-78^{\circ}\text{C}$  for further 15 min. The reaction was quenched by the dropwise addition of acetic acid (17.0 M, 0.19 mL, 3.31 mmol, 1.50 equiv.) and saturated  $\text{Na}_2\text{CO}_3$  solution (20 mL) was added. The organic and aqueous layers were separated and the aqueous layer was extracted with  $\text{CH}_2\text{Cl}_2$  (3x 20 mL). The organic phase was dried over  $\text{Na}_2\text{SO}_4$ , filtered off and the solvents were removed under reduced pressure. Purification of the crude product was performed *via* column chromatography (cyclohexane/ethyl acetate, 20/1). Product **AdPym-CHO** was obtained as a white solid (295 mg, 1.11 mmol, 51%).

**$^1\text{H-NMR}$  ( $\text{CDCl}_3$ , 600 MHz):**  $\delta$  [ppm] = 10.12 (s, 1H), 9.10 (s, 2H), 2.07 – 2.00 (s, 9H), 1.74 (d,  $J$  = 2.9 Hz, 6H).

**$^{13}\text{C-NMR}$  ( $\text{CDCl}_3$ , 151 MHz):**  $\delta$  [ppm] = 188.6, 158.6, 156.8, 126.5, 103.1, 79.7, 42.1, 36.4, 30.6, 27.9, 27.2.

**HR-MS (EI):**  $m/z$  calc. for  $\text{C}_{17}\text{H}_{18}\text{N}_2\text{O}$ : 266.1419, found: 266.1415.

## 2.11 1-(2-((Adamantan-1-yl)ethynyl)pyrimidin-5-yl)-2-methylpropan-1-ol (**AdPym-OH**)

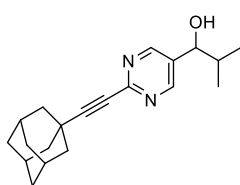

This synthesis is a modification of a reported procedure.<sup>[3]</sup> **AdPym-Br** (1.01 g, 3.18 mmol, 1.00 equiv.) was dissolved in dry THF (30 mL) and the solution was cooled to  $-97^{\circ}\text{C}$  (MeOH/ liquid  $\text{N}_2$ ). To this mixture, *n*BuLi (2.3 M in hexane, 1.66 mL, 3.82 mmol, 1.20 equiv.) was added dropwise. After stirring the mixture at  $-97^{\circ}\text{C}$  for 10 min, isobutyraldehyde (0.35 mL, 3.82 mmol, 1.20 equiv.) was added dropwise. The mixture was stirred for another 20 min before the reaction was quenched by adding HCl (2 M in  $\text{Et}_2\text{O}$ , 1.60 mL, 3.2 mmol, 1.00 equiv.). After adding saturated  $\text{Na}_2\text{CO}_3$  solution (10 mL), the layers were separated. The aqueous layer was extracted with ethyl acetate (3x 20 mL). The combined organic layer was dried over  $\text{Na}_2\text{SO}_4$ , filtrated and the solvents were removed under reduced pressure. Purification

of the crude material was achieved by column chromatography (cyclohexane/ ethyl acetate, 8/1). Compound **AdPym-OH** was obtained as a white solid (182 mg, 0.59 mmol, 19%).

**<sup>1</sup>H-NMR (CDCl<sub>3</sub>, 600 MHz):** δ [ppm] = 8.62 (s, 2H), 4.51 (d, J = 6.0 Hz, 1H), 2.04 – 1.93 (m, 10H), 1.71 (t, J = 3.1 Hz, 6H), 0.94 (d, J = 6.7 Hz, 3H), 0.87 (d, J = 6.8 Hz, 3H).

**<sup>13</sup>C-NMR (CDCl<sub>3</sub>, 151 MHz):** δ [ppm] = 155.7, 152.0, 134.3, 98.3, 78.6, 75.3, 42.1, 36.3, 35.3, 30.1, 27.8, 18.5, 17.5.

**HR-MS (ESI):** m/z calc. for C<sub>20</sub>H<sub>27</sub>N<sub>2</sub>O [M+H]<sup>+</sup>: 311.2118, found: 311.2123.

### 3 *In situ* Reaction – High-Resolution MS measurements

#### 3.1 General procedure for Orbitrap *In situ* High-resolution MS measurements

The measurements were carried out according to a previously described procedure.<sup>[7]</sup> An HPLC vial was filled with a toluene stock solution of the *Soai* aldehyde and enantiopure alcohol under argon atmosphere. Immediately after the addition of the diisopropylzinc solution the reaction mixture (total volume 1 mL) was vortexed and injected *via* a syringe pump (10  $\mu$ L/min) into Orbitrap mass spectrometer. A valve switched in fixed time intervals (30 s or 1 min) to change between reaction mixture and anhydrous toluene (200  $\mu$ L/min). APCI was used for ionization under mild conditions with N<sub>2</sub> at an ion source temperature of 150 °C. The **TMSPyr**, **TMSPym** and **AdPym** systems were measured at concentrations of 30 mM aldehyde and 1.5 mM alcohol (*ee* >99%). The **AdPyr** system was measured at 40 mM aldehyde and 3 mM alcohol (*ee* >99%).

#### 3.2 Time resolved tracking of substrate aldehyde, product alcohol and zinc hemiacetal

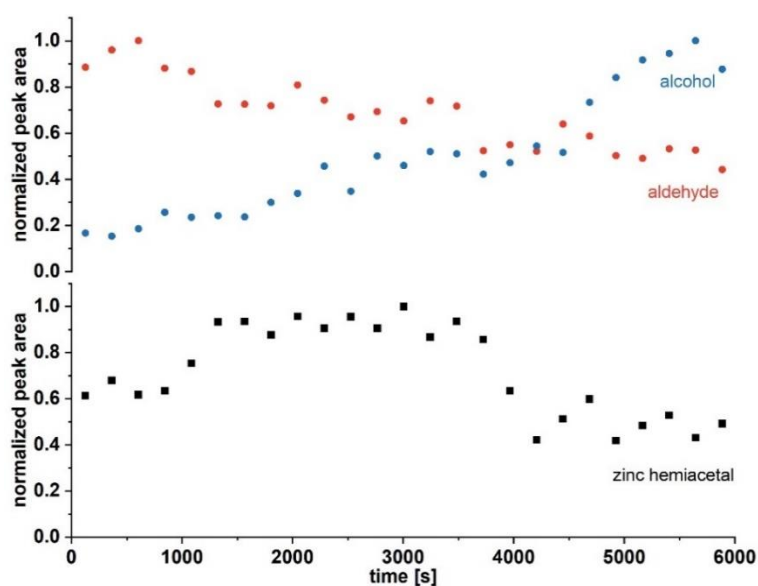

**Fig. 3.2.1:** Normalized peak areas of the aldehyde **AdPyr-CHO** and the alcohol **AdPyr-OH** (top) and the zinc hemiacetalate complex **I<sub>5</sub>** (bottom) plotted against time. Reaction conditions: 40.0 mM **TMSPym-CHO**, 1.5 mM **TMSPym-OH** (*ee* > 99%) and 40 mM *i*Pr<sub>2</sub>Zn in toluene at r.t.

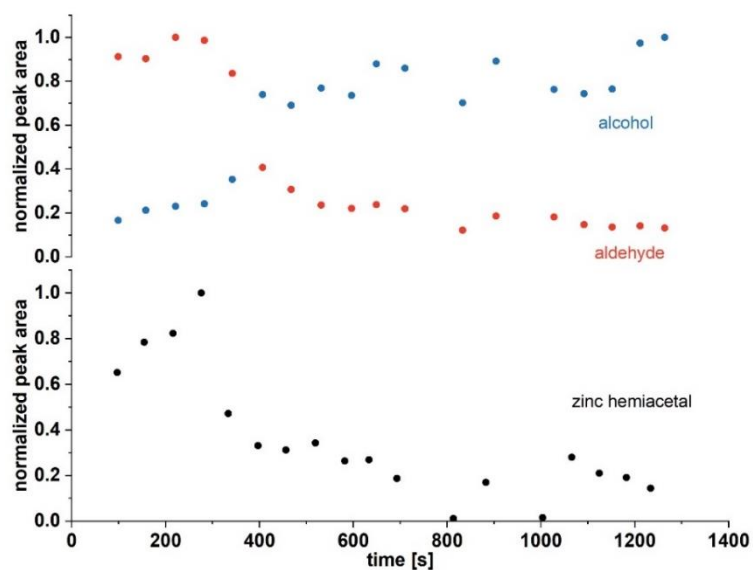

**Fig. 3.2.2:** Normalized peak areas of the aldehyde **TMSPym-CHO** and the alcohol **TMSPym-OH** (top) and the zinc hemiacetalate complex **I<sub>5</sub>** (bottom) plotted against time. Reaction conditions: 30.0 mM **TMSPym-CHO**, 1.5 mM **TMSPym-OH** (*ee* > 99%) and 40 mM *i*Pr<sub>2</sub>Zn in toluene at r.t.

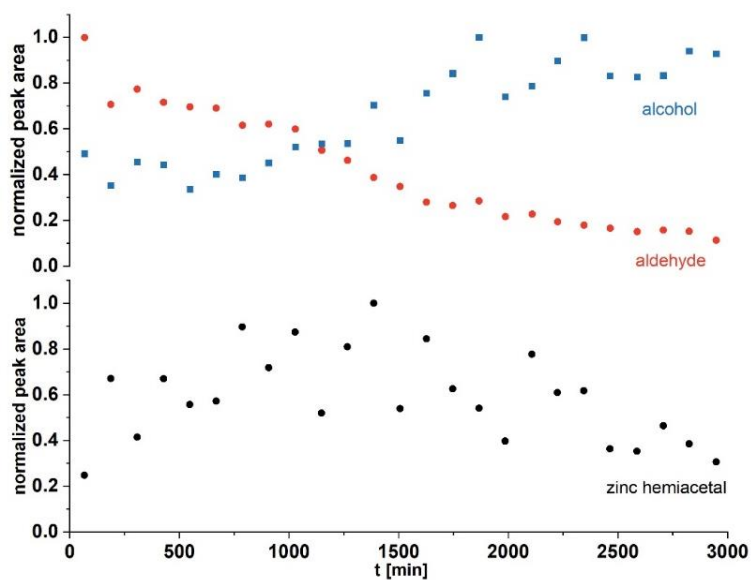

**Fig. 3.2.3:** Normalized peak areas of the aldehyde **AdPym-CHO** and the alcohol **AdPym-OH** (top) and the zinc hemiacetalate complex **I<sub>5</sub>** (bottom) plotted against time. Reaction conditions: 30.0 mM **AdPym-CHO**, 1.5 mM **AdPym-OH** (*ee* > 99%) and 40 mM *i*Pr<sub>2</sub>Zn in toluene at r.t.



### 3.3 Identification of Reaction Intermediates

#### 3.3.1 Intermediates of the TMSPyr autocatalytic system

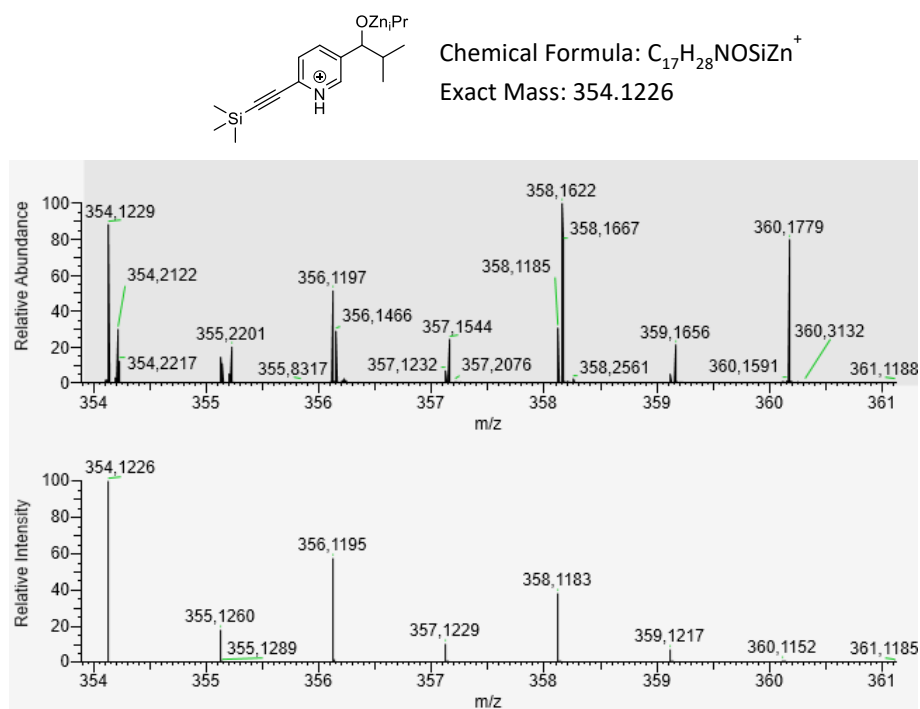

**Fig. 3.3.1:** Measured (top) and calculated (bottom) mass spectrum of intermediate  $I_{1, TMSPyr}$ .

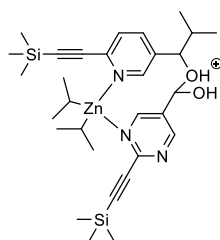

Chemical Formula:  $C_{31}H_{49}N_2O_2Si_2Zn^+$   
Exact Mass: 601,2619

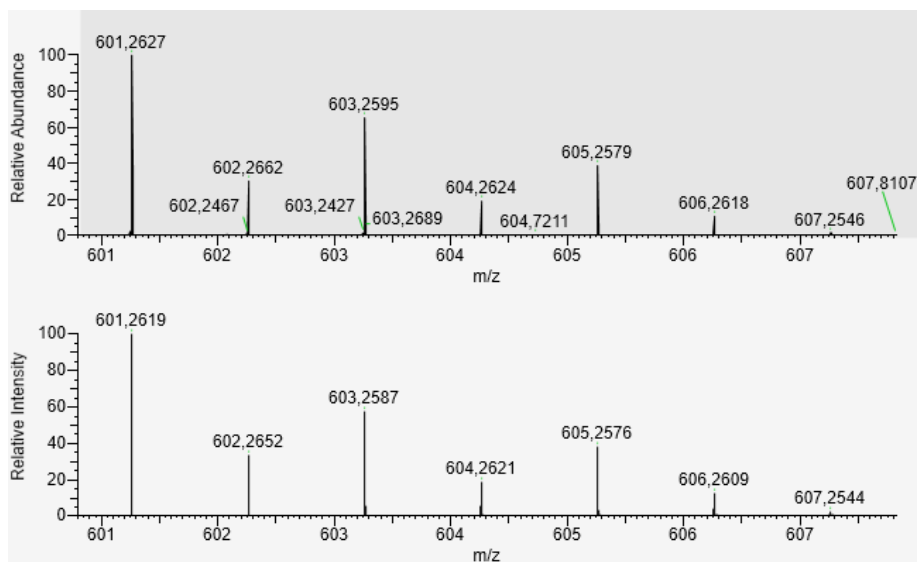

**Fig. 3.3.2:** Measured (top) and calculated (bottom) mass spectrum of an intermediate complex of  $I_{3,TMSPyr}$  and diisopropyl zinc.

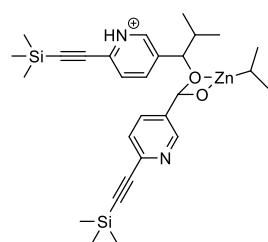

Chemical Formula:  $C_{28}H_{41}N_2O_2Si_2Zn^+$

Exact Mass: 557.1993

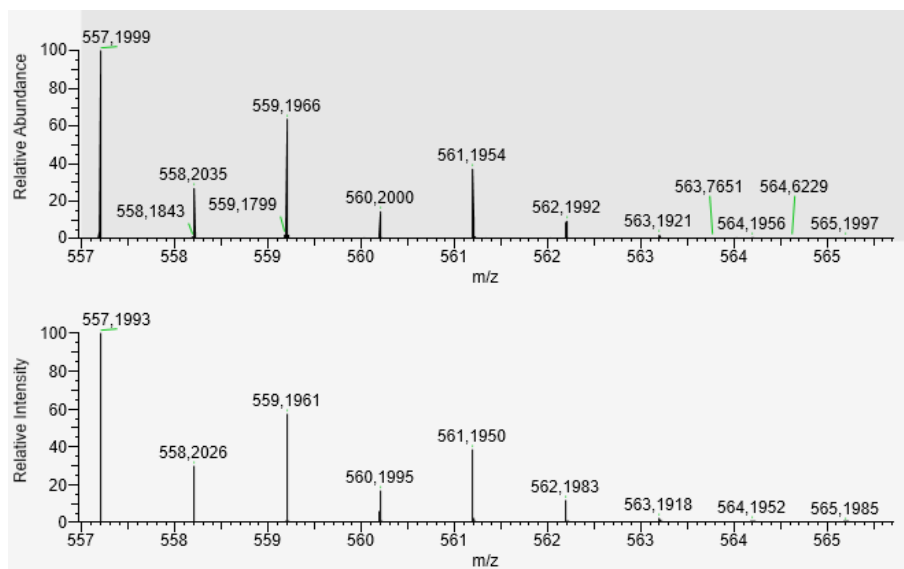

**Fig. 3.3.3:** Measured (top) and calculated (bottom) mass spectrum of intermediate  $I_{5, TMSPyr}$ .

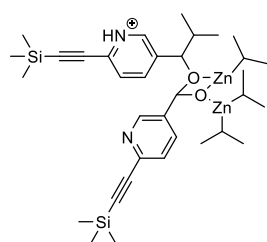

Chemical Formula:  $C_{34}H_{55}N_2O_2Si_2Zn_2^+$   
Exact Mass: 707,2380

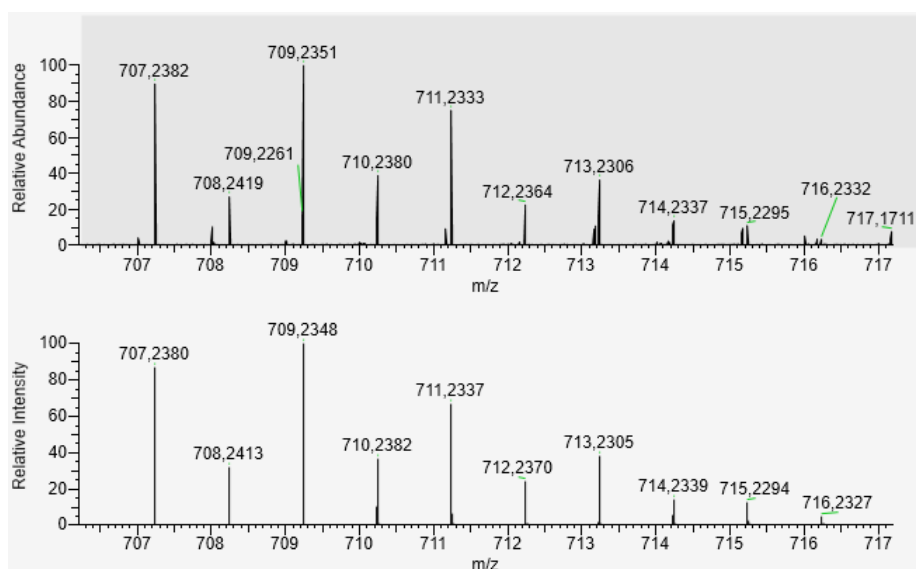

**Fig. 3.3.4:** Measured (top) and calculated (bottom) mass spectrum of intermediate  $I_{7, TMSPyr}$ .

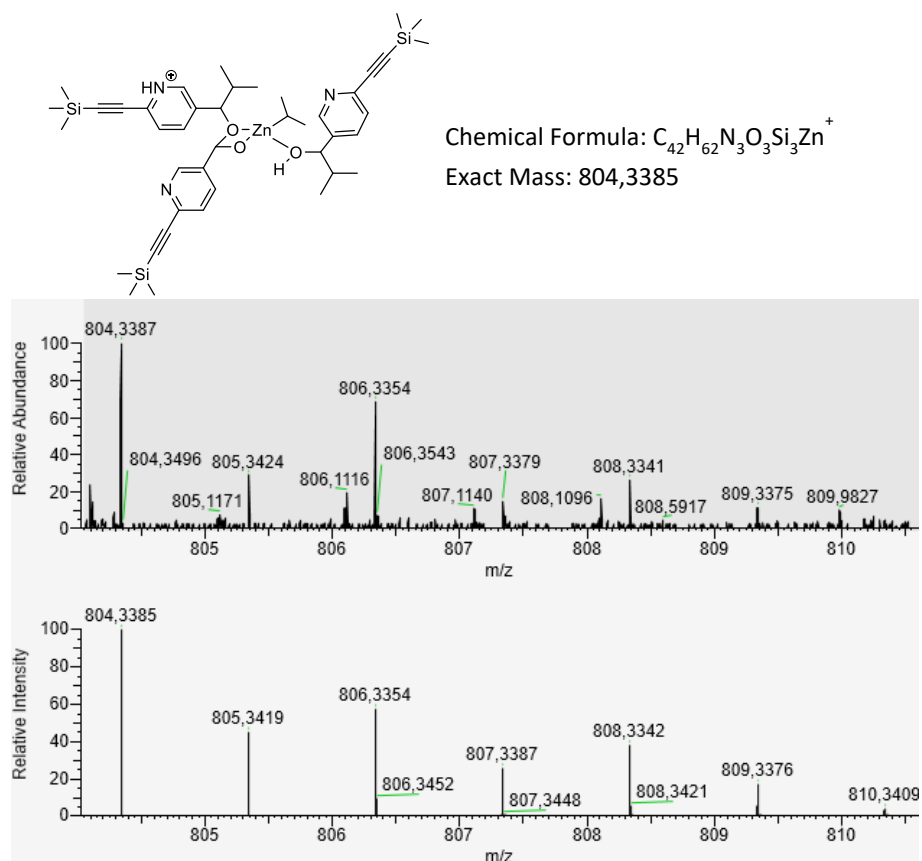

**Fig. 3.3.5:** Measured (top) and calculated (bottom) mass spectrum of intermediate **18**,  $TMSPyr$ .

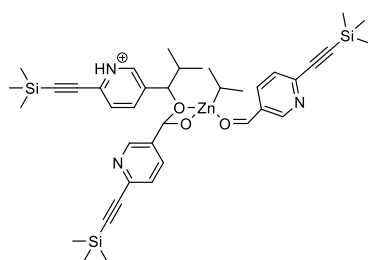

Chemical Formula:  $C_{39}H_{54}N_3O_3Si_3Zn^+$

Exact Mass: 760.2759

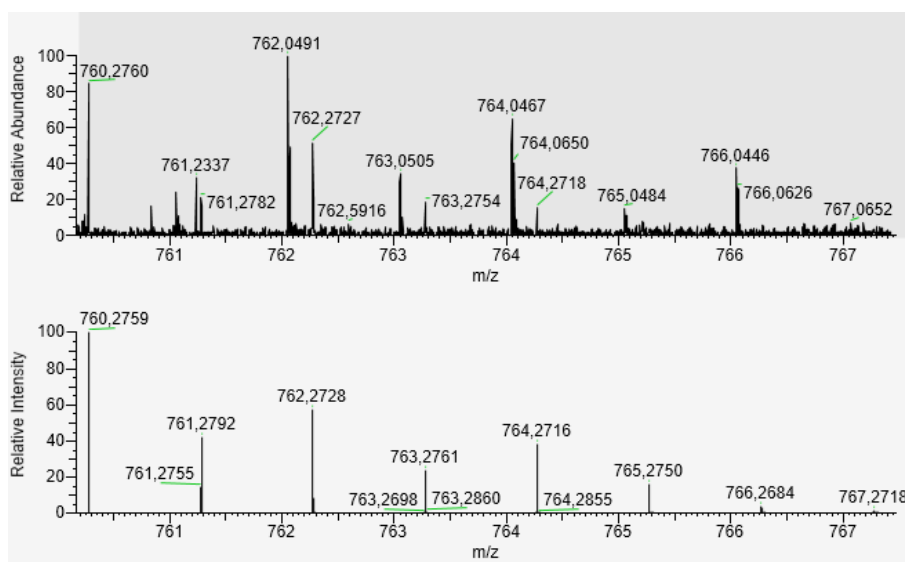

**Fig. 3.3.6:** Measured (top) and calculated (bottom) mass spectrum of intermediate **I**<sub>6</sub>, TMSPyr<sup>+</sup>.

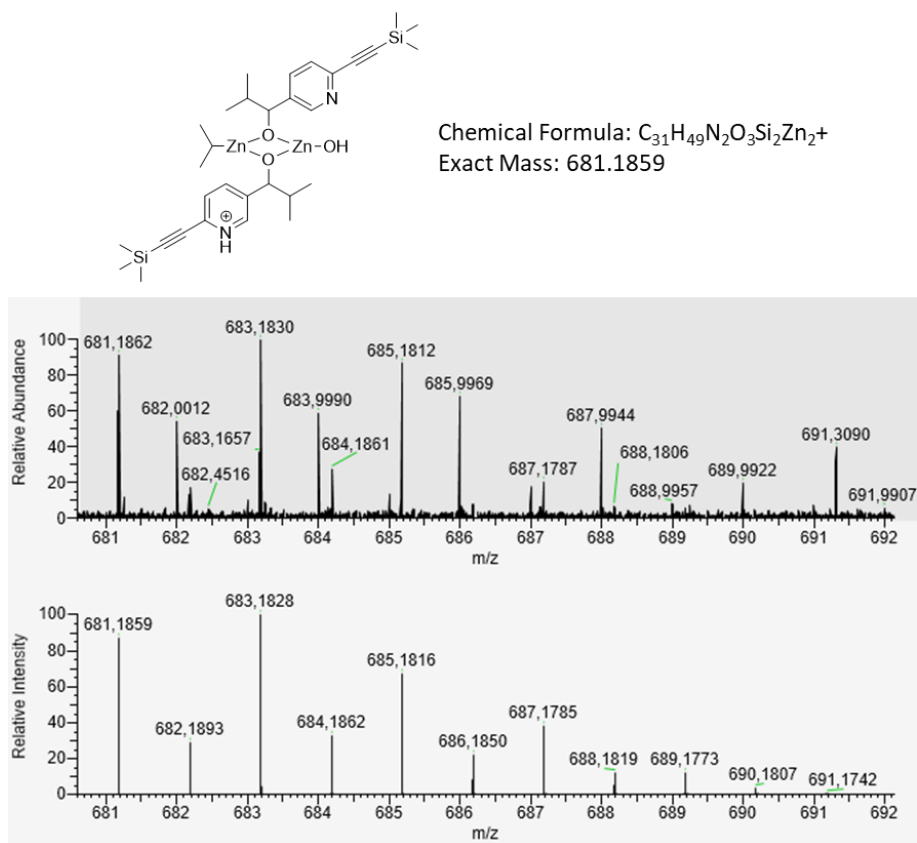

**Fig. 3.3.7:** Measured (top) and calculated (bottom) mass spectrum of intermediate  $I_{2,TMSPyr}$  (hydroxylated).

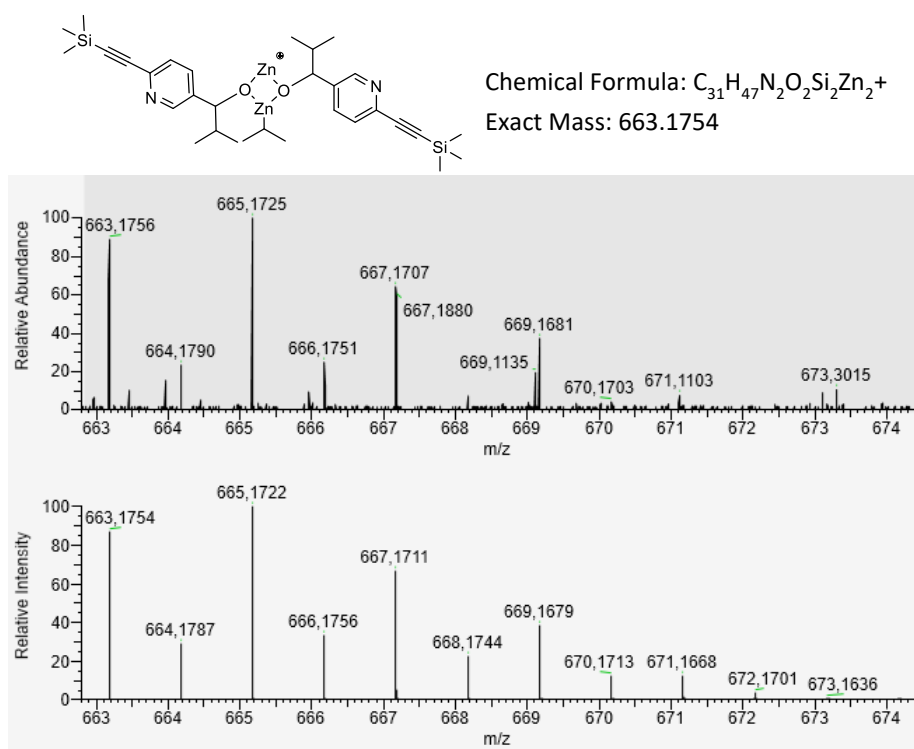

**Fig. 3.3.8:** Measured (top) and calculated (bottom) mass spectrum of intermediate  $I_{2, TMSPyr}$  (isopropyl group).



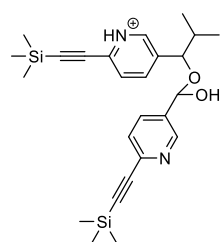

Chemical Formula:  $C_{25}H_{35}N_2O_2Si_2^+$   
Exact Mass: 451.2232

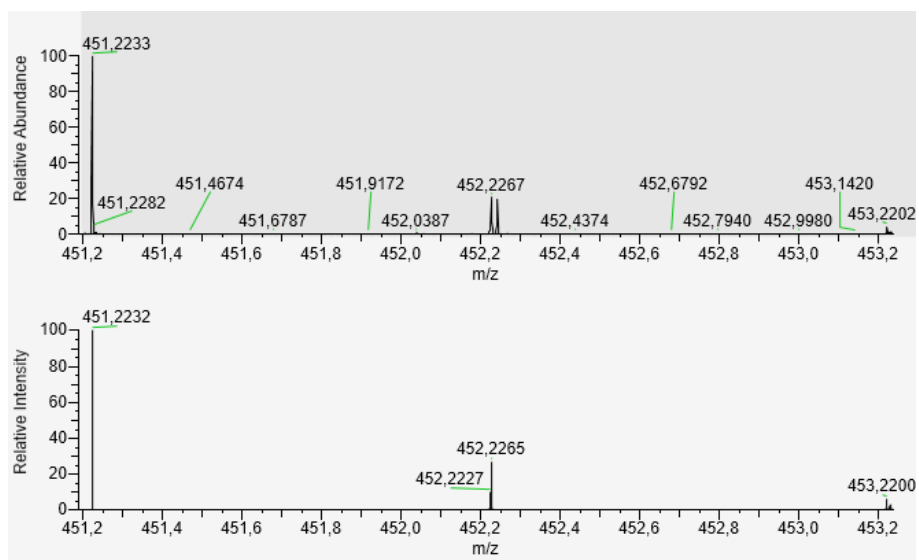

**Fig. 3.3.10:** Measured (top) and calculated (bottom) mass spectrum of intermediate  $I_{3,TMSPyr}$ .

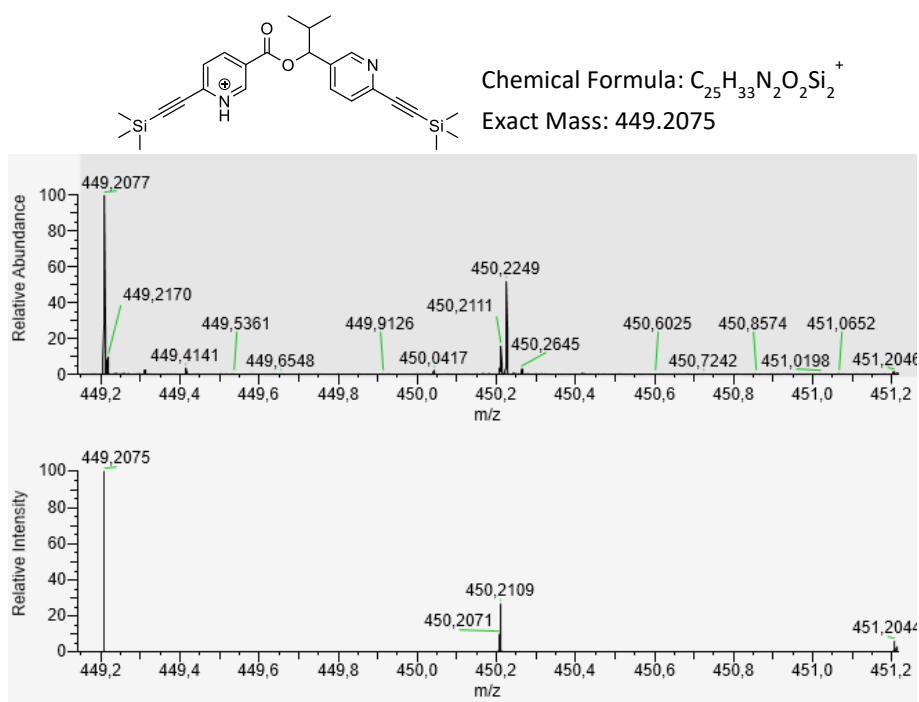

**Fig 3.3.11:** Measured (top) and calculated (bottom) mass spectrum of intermediate **I<sub>4</sub>,<sub>TMSPyr</sub>**.

### 3.3.2 Intermediates of the AdPyr autocatalytic system

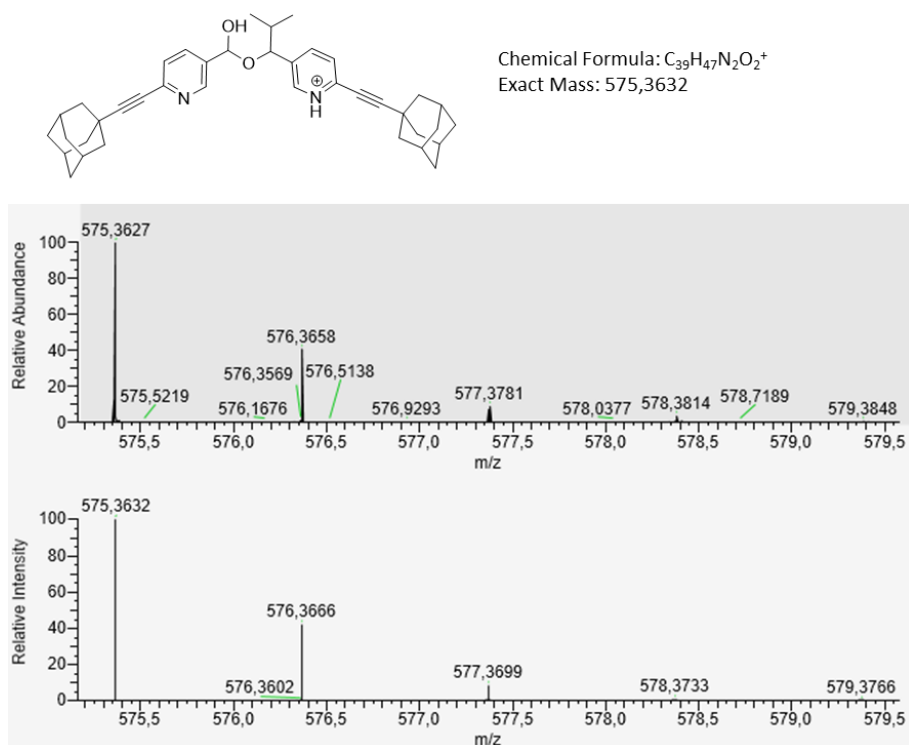

**Fig. 3.3.12:** Measured (top) and calculated (bottom) mass spectrum of intermediate  $I_{3,AdPyr}$ .

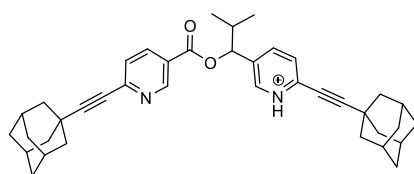

Chemical Formula:  $C_{39}H_{45}N_2O_2^+$

Exact Mass: 573.3476

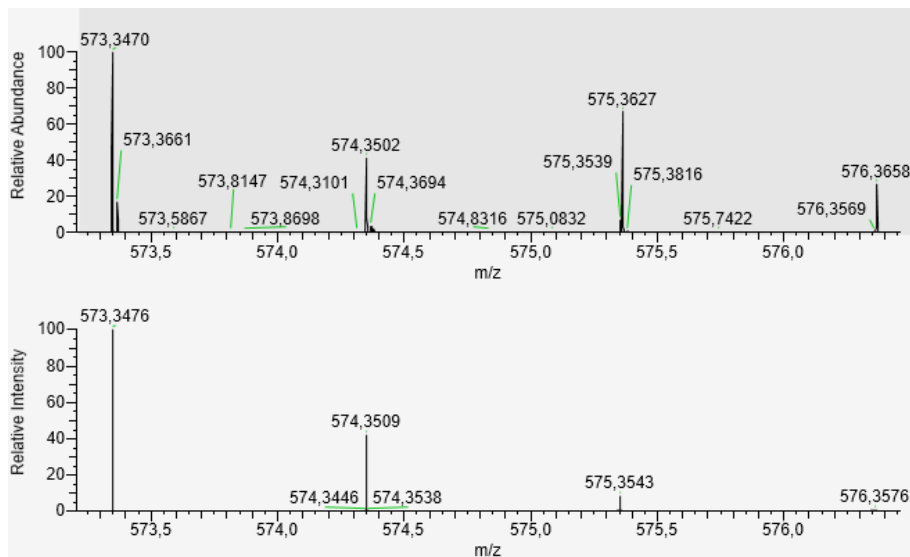

**Fig. 3.3.13:** Measured (top) and calculated (bottom) mass spectrum of intermediate **I<sub>4,AdP</sub>**

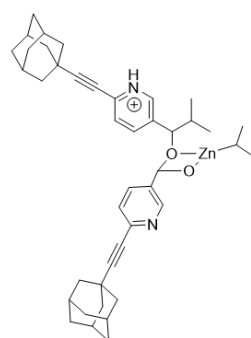

Chemical Formula:  $C_{42}H_{53}N_2O_2Zn^+$   
Exact Mass: 681,3393

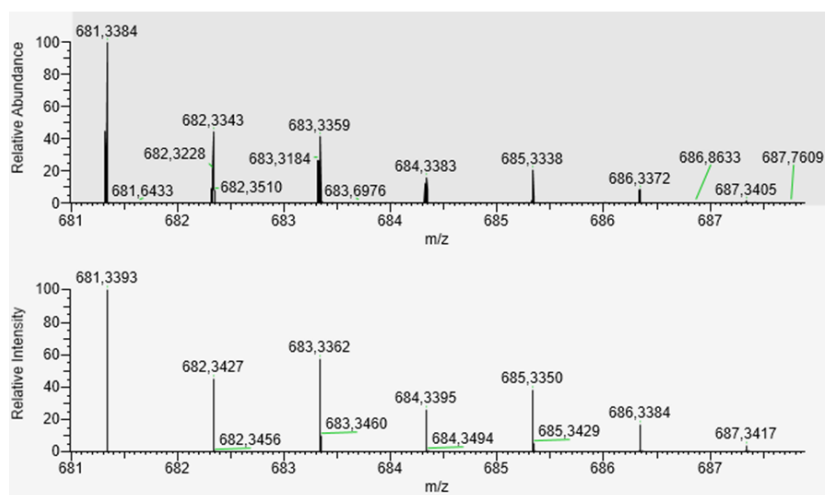

**Fig. 3.3.14:** Measured (top) and calculated (bottom) mass spectrum of intermediate  $I_{5,AdPyr}$ .

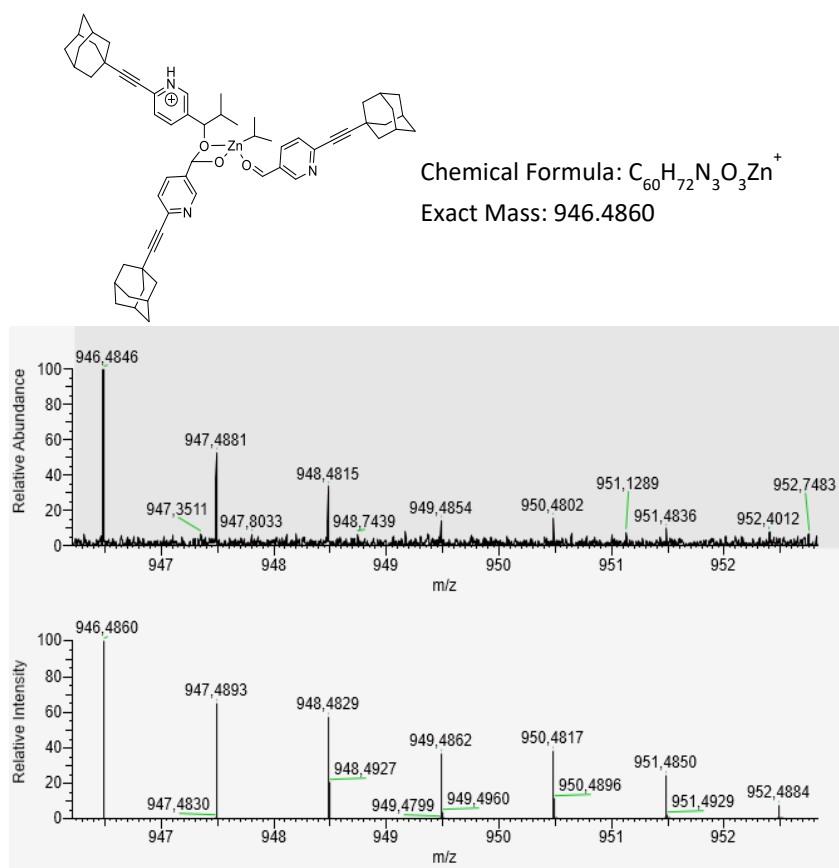

**Fig. 3.3.15:** Measured (top) and calculated (bottom) mass spectrum of intermediate **I<sub>6,AdPyr</sub>**.

### 3.3.3 Intermediates of the TMSPym autocatalytic system

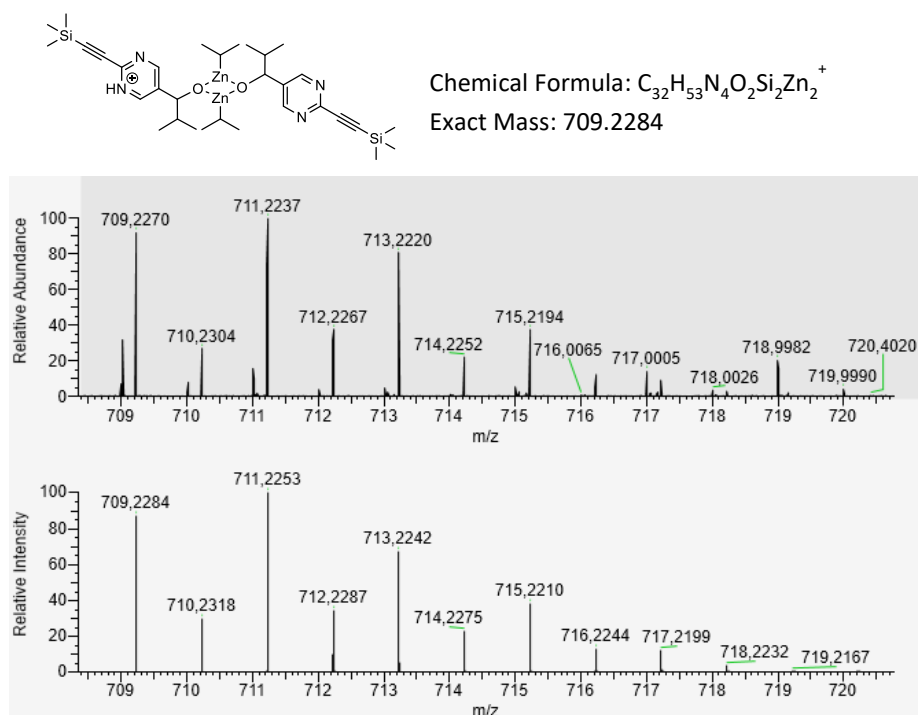

**Fig. 3.3.16:** Measured (top) and calculated (bottom) mass spectrum of intermediate  $I_{2, TMSPym}$ .

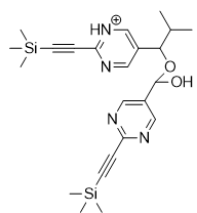

Chemical Formula:  $C_{23}H_{33}N_4O_2Si_2^+$   
Exact Mass: 453.2137

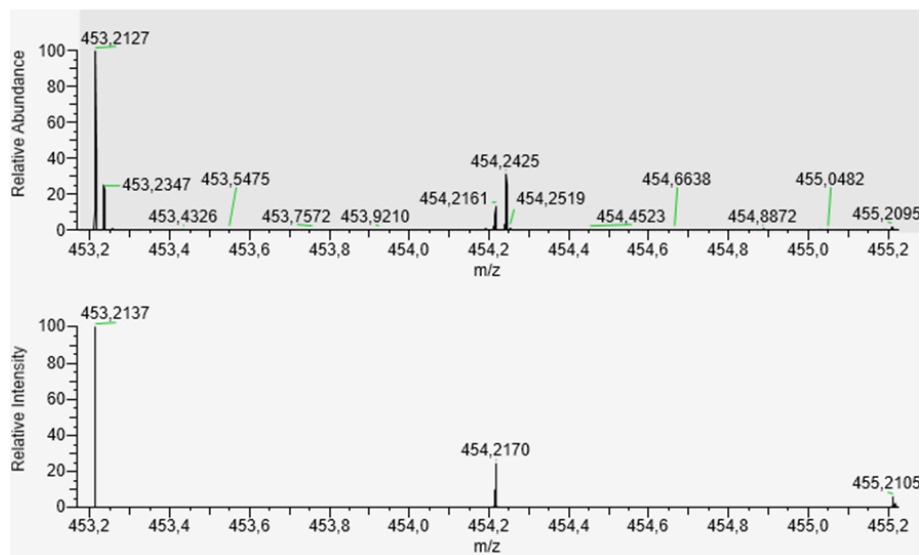

**Fig. 3.3.17:** Measured (top) and calculated (bottom) mass spectrum of intermediate  $I_{3, TMSPym}$ .



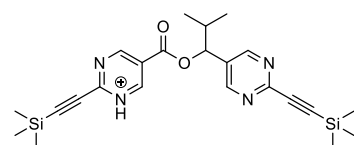

Chemical Formula:  $C_{23}H_{31}N_4O_2Si_2^+$

Exact Mass: 451.1980

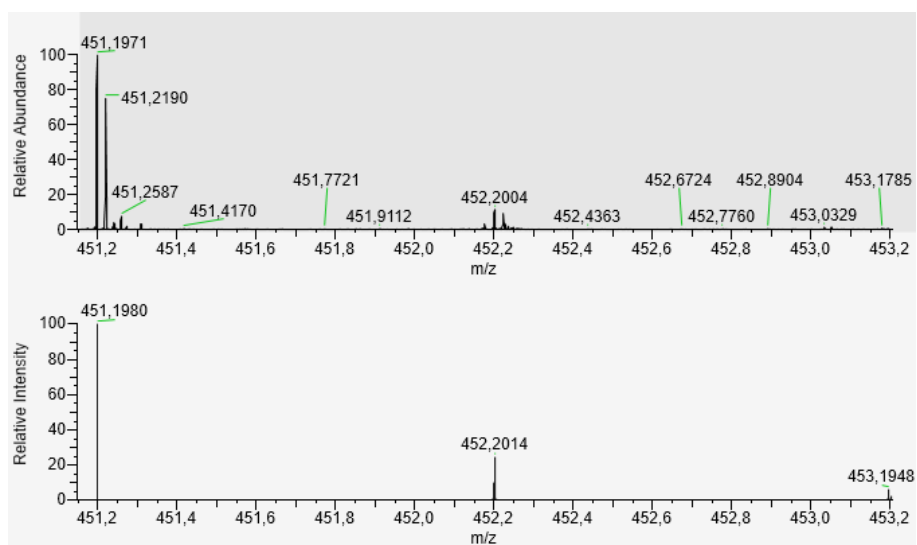

**Fig 3.3.18:** Measured (top) and calculated (bottom) mass spectrum of intermediate **I<sub>4,TMSPym</sub>**.

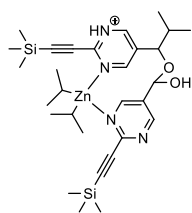

Chemical Formula:  $C_{29}H_{47}N_4O_2Si_2Zn^+$   
Exact Mass: 603.2524

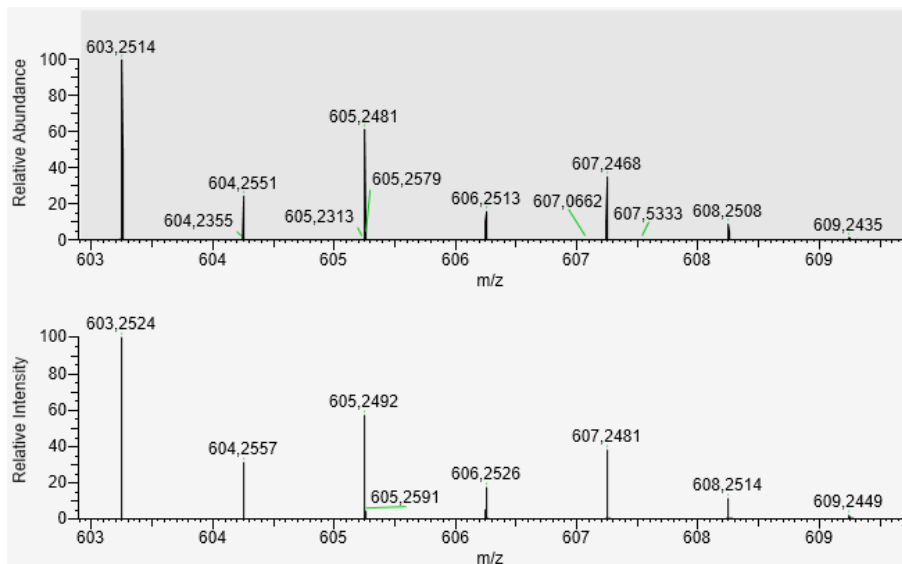

**Fig. 3.3.19:** Measured (top) and calculated (bottom) mass spectrum of intermediate complex of  $I_{3,TMSPyrim}$  and diisopropyl zinc.

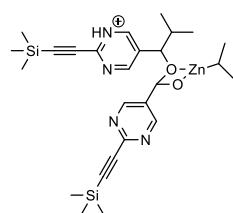

Chemical Formula:  $C_{26}H_{39}N_4O_2Si_2Zn^+$   
Exact Mass: 559.1898

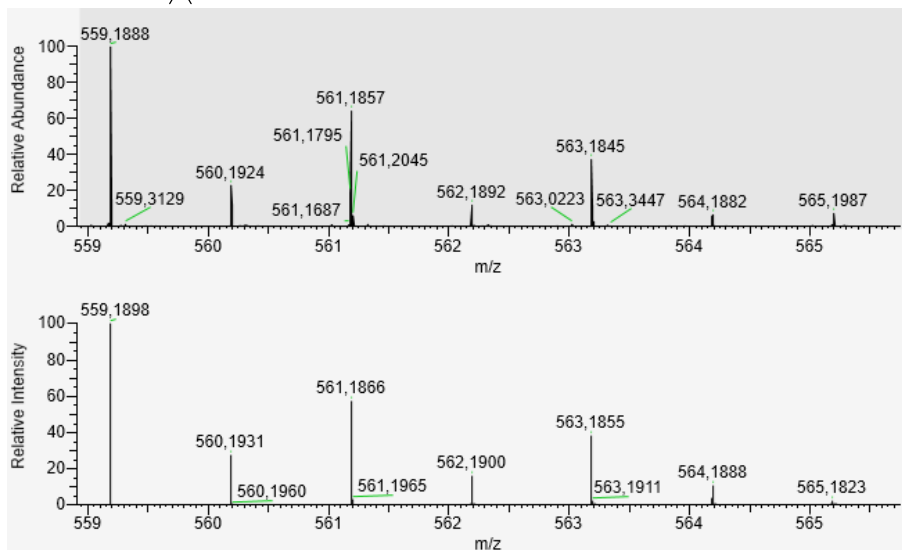

**Fig. 3.3.20:** Measured (top) and calculated (bottom) mass spectrum of intermediate  $I_{5, TMSPym}$ .

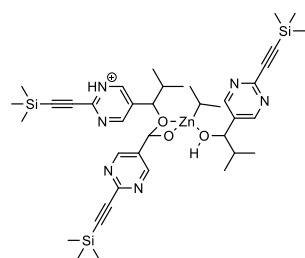

Chemical Formula:  $C_{39}H_{59}N_6O_3Si_3Zn^+$   
Exact Mass: 807.3242

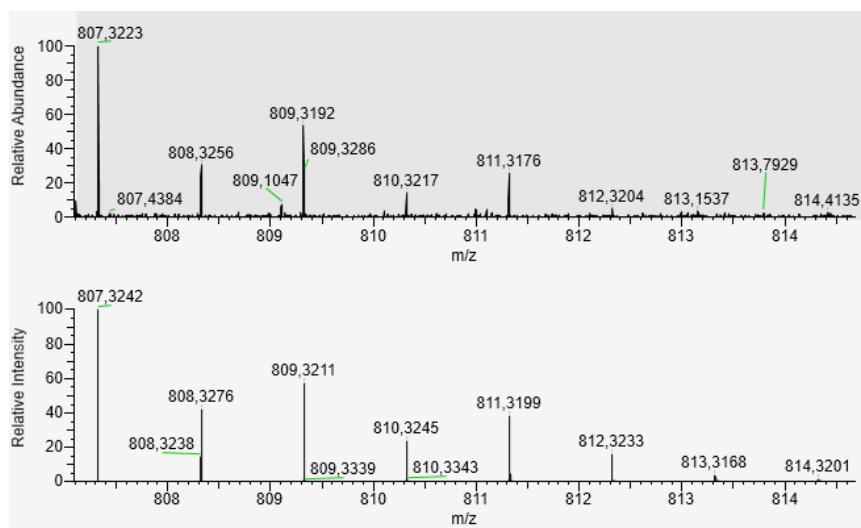

**Fig. 3.3.21:** Measured (top) and calculated (bottom) mass spectrum of intermediate **I<sub>8</sub>**, TMSPym.

### 3.3.4 Intermediates of the AdPym autocatalytic system

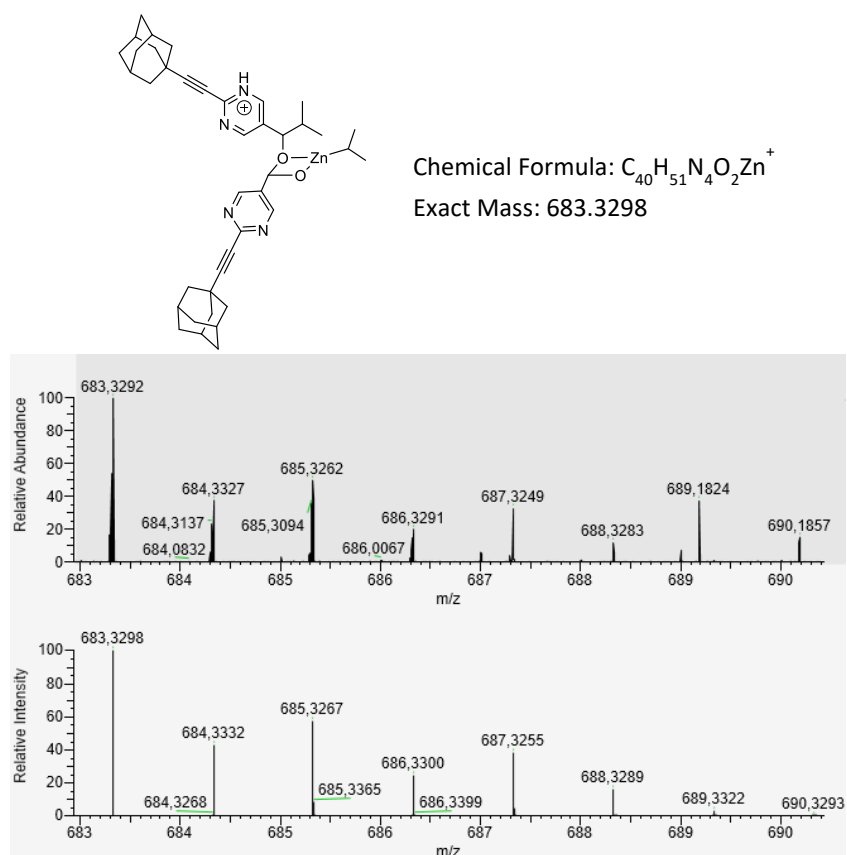

**Fig. 3.3.22:** Measured (top) and calculated (bottom) mass spectrum of intermediate  $I_{5,AdPym}$ .

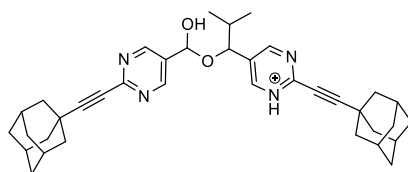

Chemical Formula:  $C_{37}H_{45}N_4O_2^+$   
Exact Mass: 577.3537

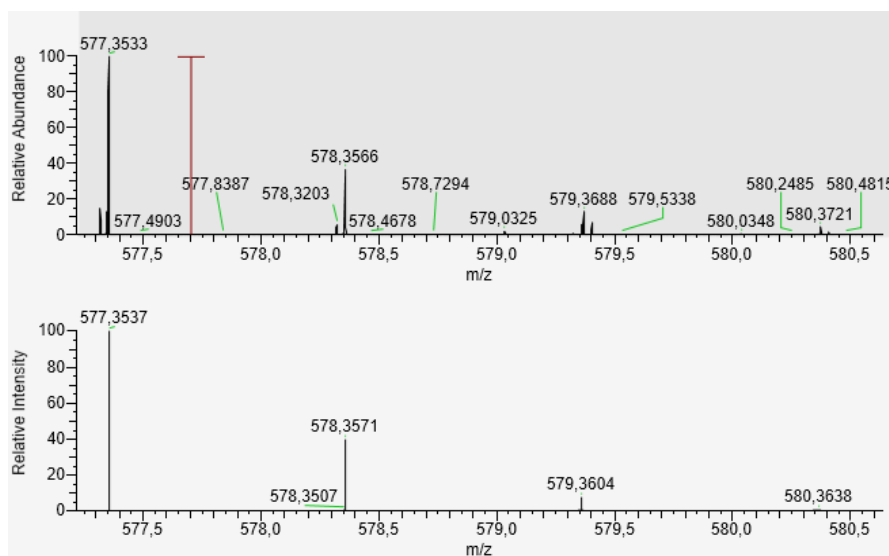

**Fig. 3.3.23:** Measured (top) and calculated (bottom) mass spectrum of intermediate **I<sub>5,AdPym</sub>**.

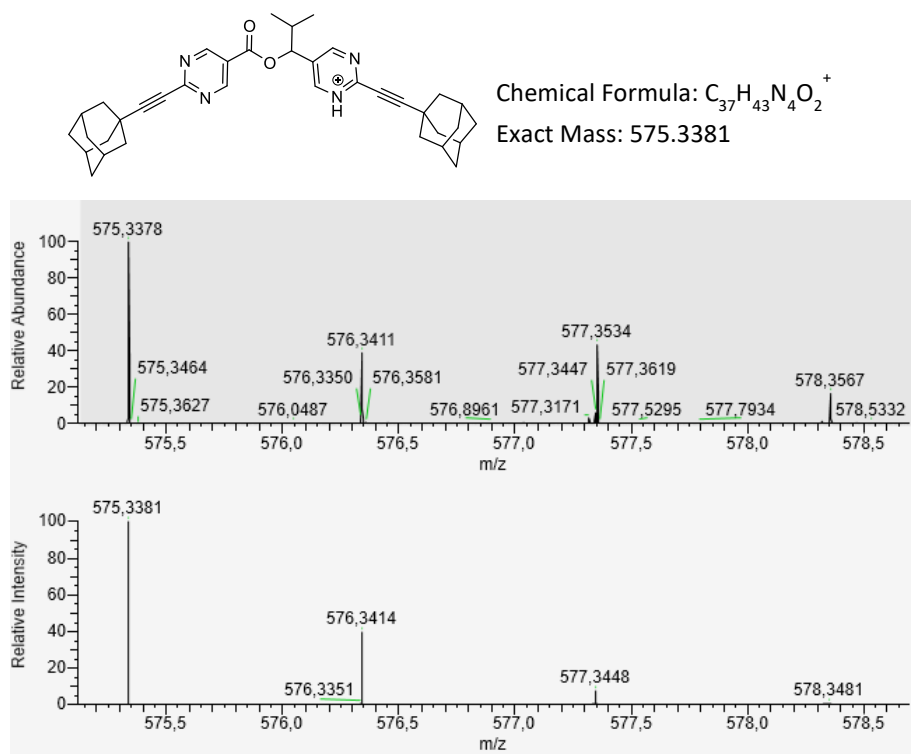

**Fig. 3.3.24:** Measured (top) and calculated (bottom) mass spectrum of intermediate **I<sub>4,AdPym</sub>**.

## 4 Kinetic Investigations

### 4.1 General procedure for flow injection analysis (FIA) HPLC measurements

All kinetic measurements were carried out in new glass HPLC vials (Duran) which were dried in a 500 mL *Schlenk* flask prior to use and stored under Argon atmosphere. Stock solutions were prepared to mix them in a HPLC vial under argon atmosphere. All kinetic measurements were performed at room temperature. To ensure reproducibility, the measurements for one concentration were carried out three times and the respective mean value was used for further calculation.

An HPLC vial (1.5 mL) was filled with toluene stock solutions of aldehyde (0.86 mL) and alcohol (0.10 mL) under argon atmosphere. The vial was capped. Immediately after the addition of the diisopropylzinc stock solution (40  $\mu$ L, 40 mM) the reaction mixture (total volume 1 mL) was vortexed and the FIA-HPLC measurement was started. A solvent mixture of *n*-hexane/THF was chosen as eluent to obtain separate the substrates and reaction products and to avoid hemiacetal formation of the aldehyde with isopropanol.

For the kinetic analysis of the pyridine system **TMSPyr**, a Chiralpak® ID column (250 mm, i.D. 4.6 mm, particle size: 5  $\mu$ m) from *Chiral Technologies* was used as stationary phase. A *n*-hexane/THF mixture = 80/20 was used as eluent at a 1.2 ml/min flow rate. The injection of the reaction mixture into the column was performed in time intervals of 2.3 min.

For the kinetic analysis of the pyridine system **AdPyr**, a Chiralpak® ID column (250 mm, i.D. 4.6 mm, particle size: 5  $\mu$ m) from *Chiral Technologies* was used as stationary phase. A *n*-hexane/THF mixture = 75/25 was used as eluent at a 1.0 ml/min flow rate. The injection of the reaction mixture into the column was performed in time intervals of 4.3 min.

For the kinetic analysis of the pyrimidine system **TMSPym**, a Chiralpak® IB column (250 mm, i.D. 4.6 mm, particle size: 5  $\mu$ m) from *Chiral Technologies* was used as stationary phase. A *n*-hexane/THF mixture = 70/30 was used as eluent at a 1.2 ml/min flow rate. The injection of the reaction mixture into the column was performed in time intervals of 2.2 min.

For the kinetic analysis of the pyrimidine system **AdPym**, a Chiralpak® IC column (250 mm, i.D. 4.6 mm, particle size: 5  $\mu$ m) from *Chiral Technologies* was used as stationary phase. A *n*-hexane/THF mixture = 75/25 was used as eluent at a 1.0 ml/min flow rate. The injection of the reaction mixture into the column was performed in time intervals of 3.6 min.



## 4.2 TMSPyr-CHO/TMSPyr-OH System

### 4.2.1 Calibration plots for quantitative analysis of kinetic measurements

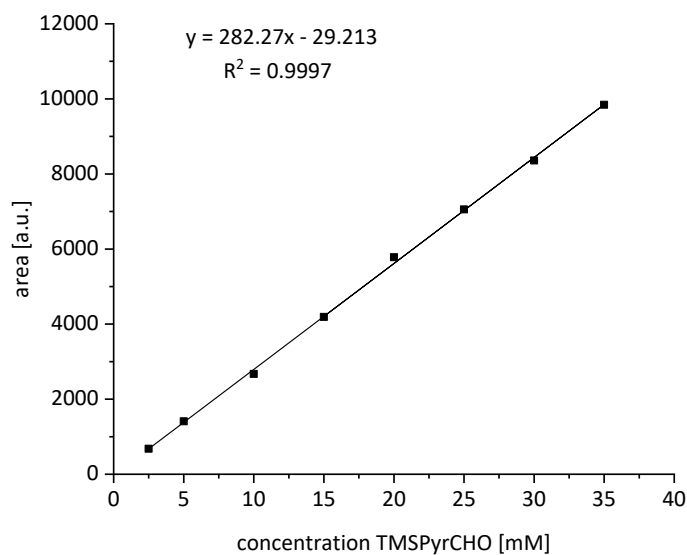

**Fig. 4.2.1:** Calibration plot on HPLC for **TMSPyr-CHO** on a Chiralpak ID<sup>®</sup> column (250 mm, i.D. 4.6 mm, particle size: 5  $\mu$ m), *n*-hexane/THF = 80/20, 1.2 mL/min,  $\lambda$  = 250 nm, r.t.

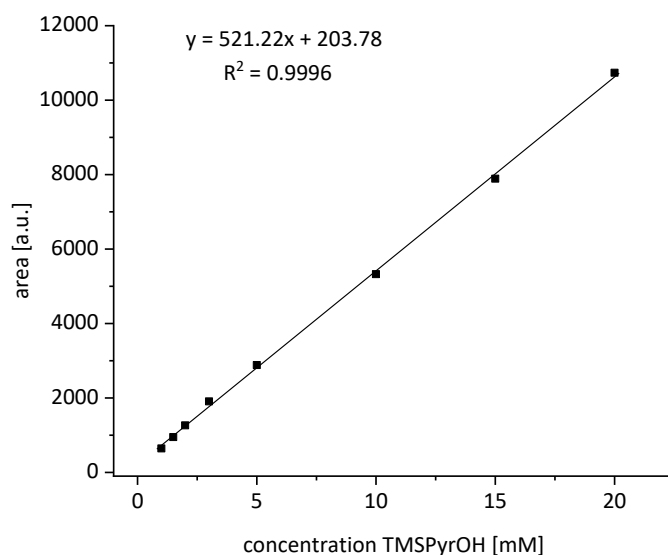

**Fig. 4.2.2:** Calibration plot on HPLC for **TMSPyr-OH** (*ee* > 99%) on a Chiralpak ID<sup>®</sup> column (250 mm, i.D. 4.6 mm, particle size: 5  $\mu$ m), *n*-hexane/THF = 80/20, 1.2 mL/min,  $\lambda$  = 250 nm, r.t.

#### 4.2.2 Variation of the TMSPyr-CHO concentration

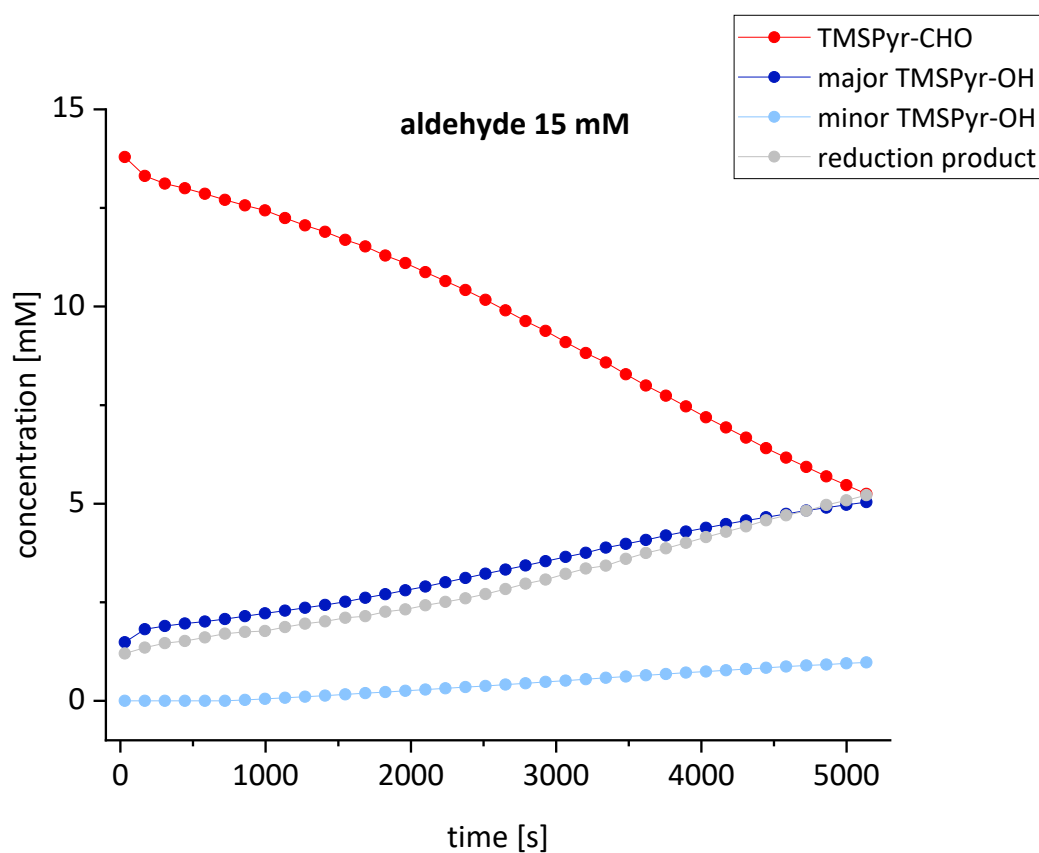

**Fig. 4.2.3:** Concentration-time profile of the *Soai* reaction in toluene (15 mM 6-((trimethylsilyl)ethynyl)nicotinaldehyde **TMSPyr-CHO**, 1.5 mM (1*R*)-2-methyl-(6-((trimethylsilyl)ethynyl)-pyridine-3-yl)propanol **TMSPyr-OH** (*ee* > 99.9%) and 40 mM *i*Pr<sub>2</sub>Zn; r.t.

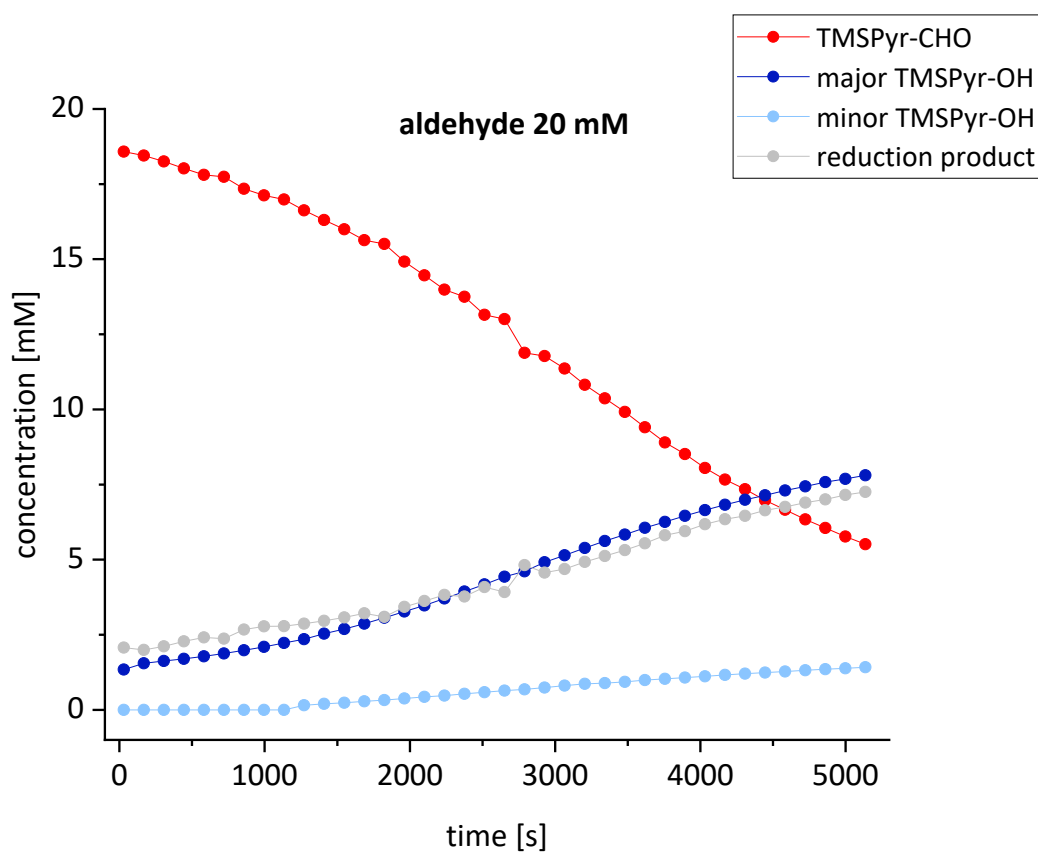

**Fig. 4.2.4:** Concentration-time profile of the *Soai* reaction in toluene (20 mM 6-((trimethylsilyl)ethynyl)nicotinaldehyde **TMSPyr-CHO**, 1.5 mM (1*R*)-2-methyl-(6-((trimethylsilyl)ethynyl)pyridine-3-yl)propanol **TMSPyr-OH** (*ee* > 99.9%) and 40 mM *i*Pr<sub>2</sub>Zn; r.t.

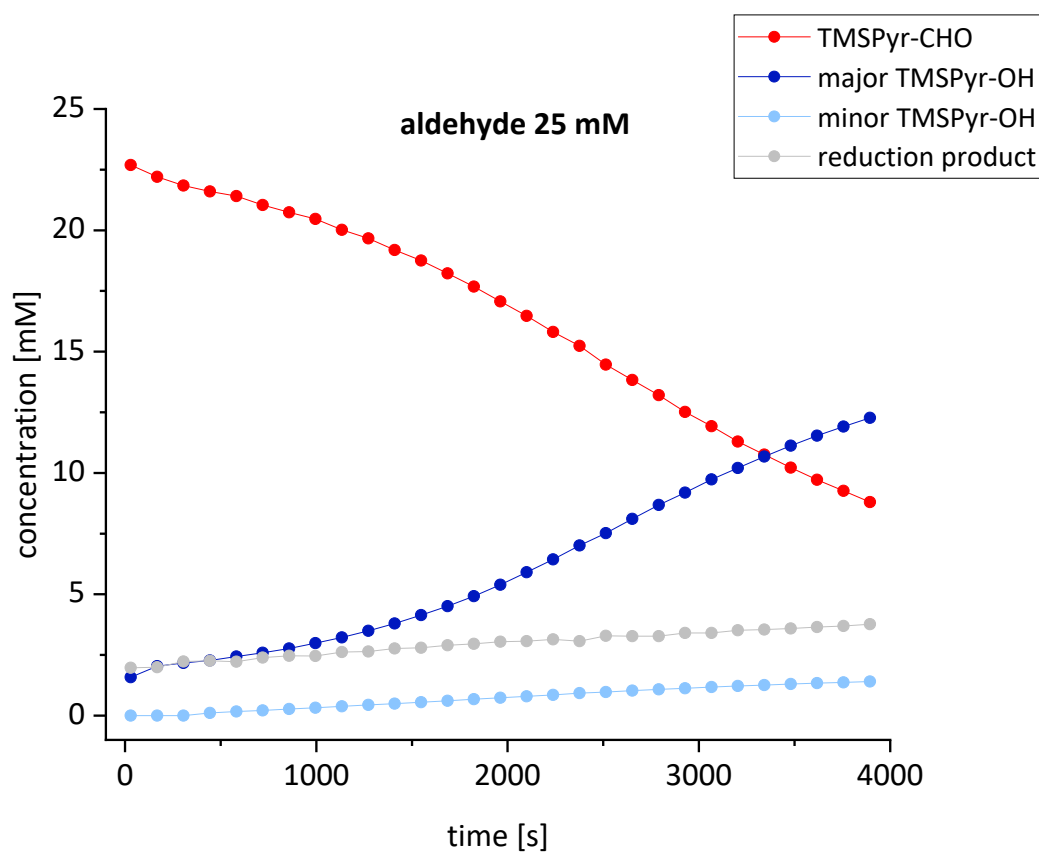

**Fig. 4.2.5:** Concentration-time profile of the *Soai* reaction in toluene (25 mM 6-((trimethylsilyl)ethynyl)nicotinaldehyde **TMSPyr-CHO**, 1.5 mM (1*R*)-2-methyl-(6-((trimethylsilyl)ethynyl)-pyridine-3-yl)propanol **TMSPyr-OH** (*ee* > 99.9%) and 40 mM *i*Pr<sub>2</sub>Zn; r.t.

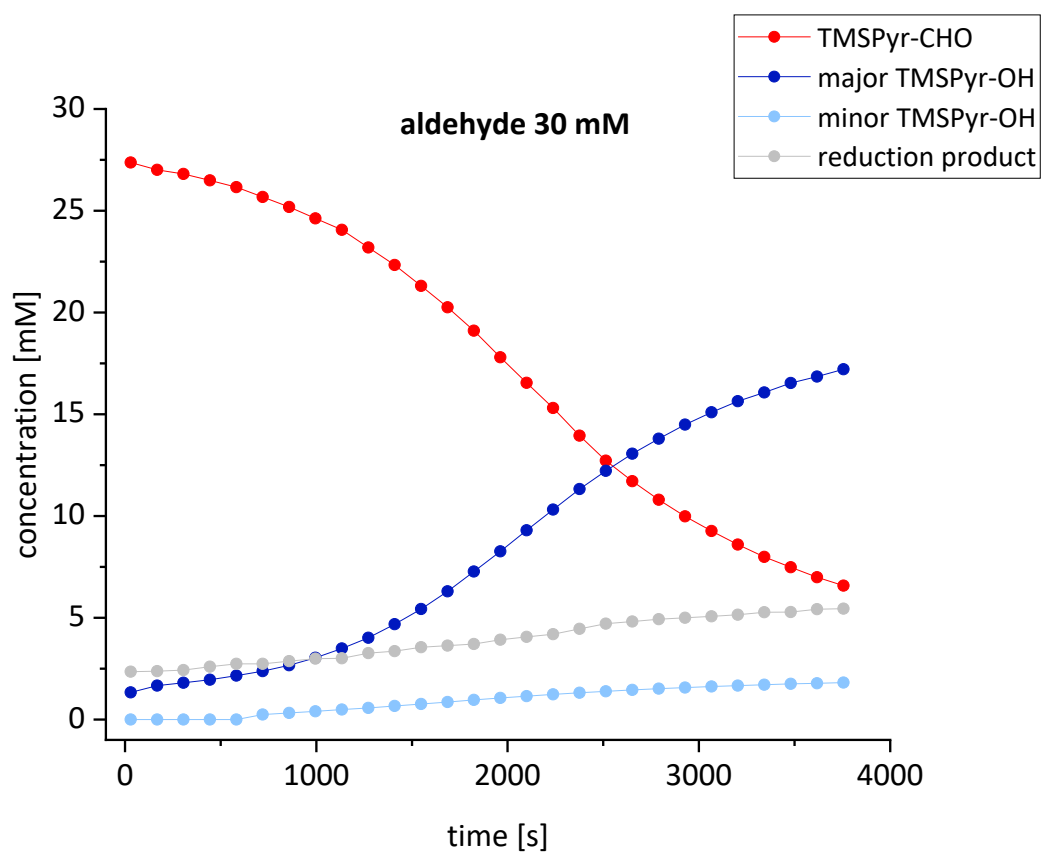

**Fig. 4.2.6:** Concentration-time profile of the *Soai* reaction in toluene (30 mM 6-((trimethylsilyl)ethynyl)nicotinaldehyde **TMSPyr-CHO**, 1.5 mM (1*R*)-2-methyl-6-((trimethylsilyl)ethynyl)-pyridine-3-yl)propanol **TMSPyr-OH** (*ee* > 99.9%) and 40 mM *i*Pr<sub>2</sub>Zn; r.t.

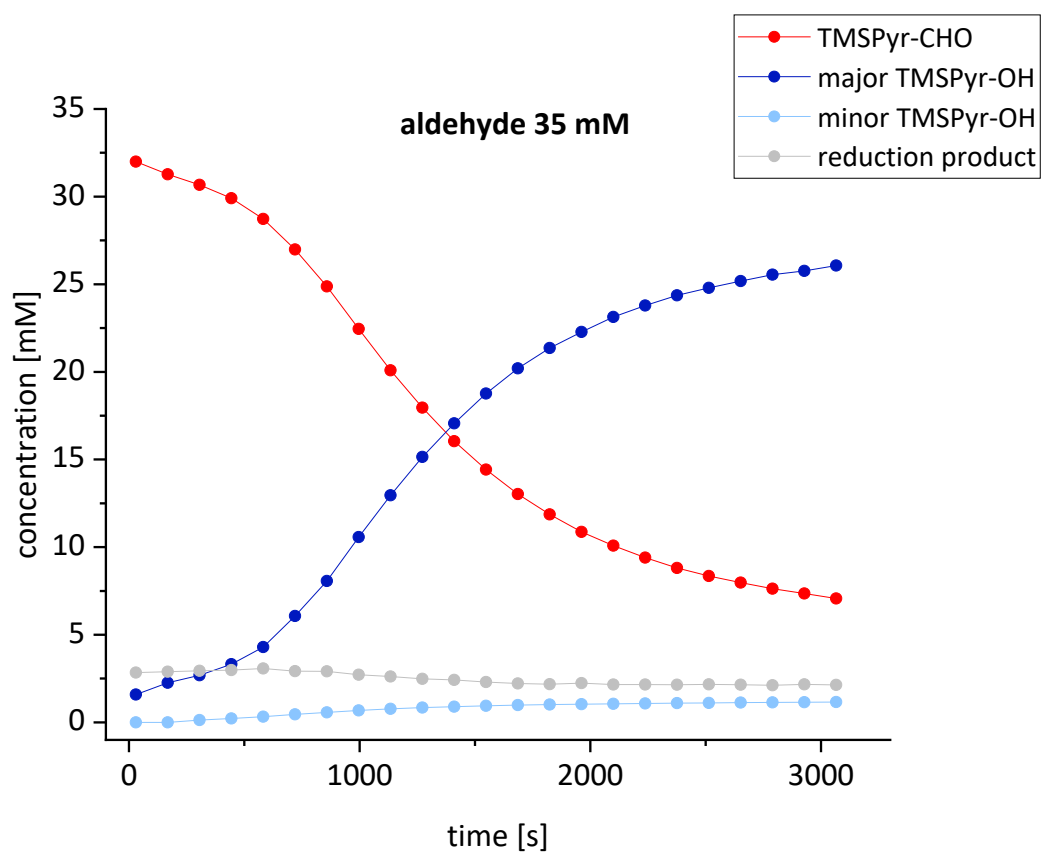

**Fig. 4.2.7:** Concentration-time profile of the *Soai* reaction in toluene (35 mM 6-((trimethylsilyl)ethynyl)nicotinaldehyde **TMSPyr-CHO**, 1.5 mM (1*R*)-2-methyl-(6-((trimethylsilyl)ethynyl)-pyridine-3-yl)propanol **TMSPyr-OH** (*ee* > 99.9%) and 40 mM *i*Pr<sub>2</sub>Zn; r.t.

#### 4.2.3 Variation of the TMSPyr-OH concentration

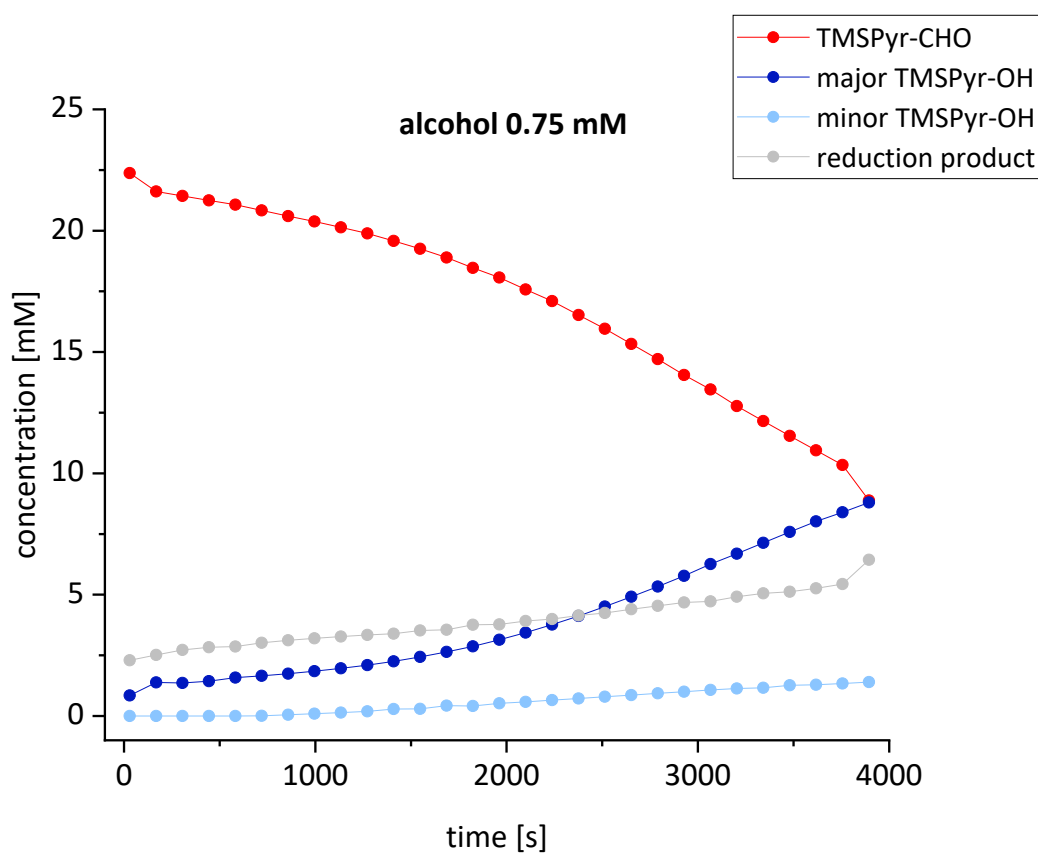

**Fig. 4.2.8:** Concentration-time profile of the *Soai* reaction in toluene (25 mM 6-((trimethylsilyl)ethynyl)nicotinaldehyde **TMSPyr-CHO**, 0.75 mM (1*R*)-2-methyl-(6-((trimethylsilyl)ethynyl)pyridine-3-yl)propanol **TMSPyr-OH** (*ee* > 99.9%) and 40 mM *i*Pr<sub>2</sub>Zn; r.t.

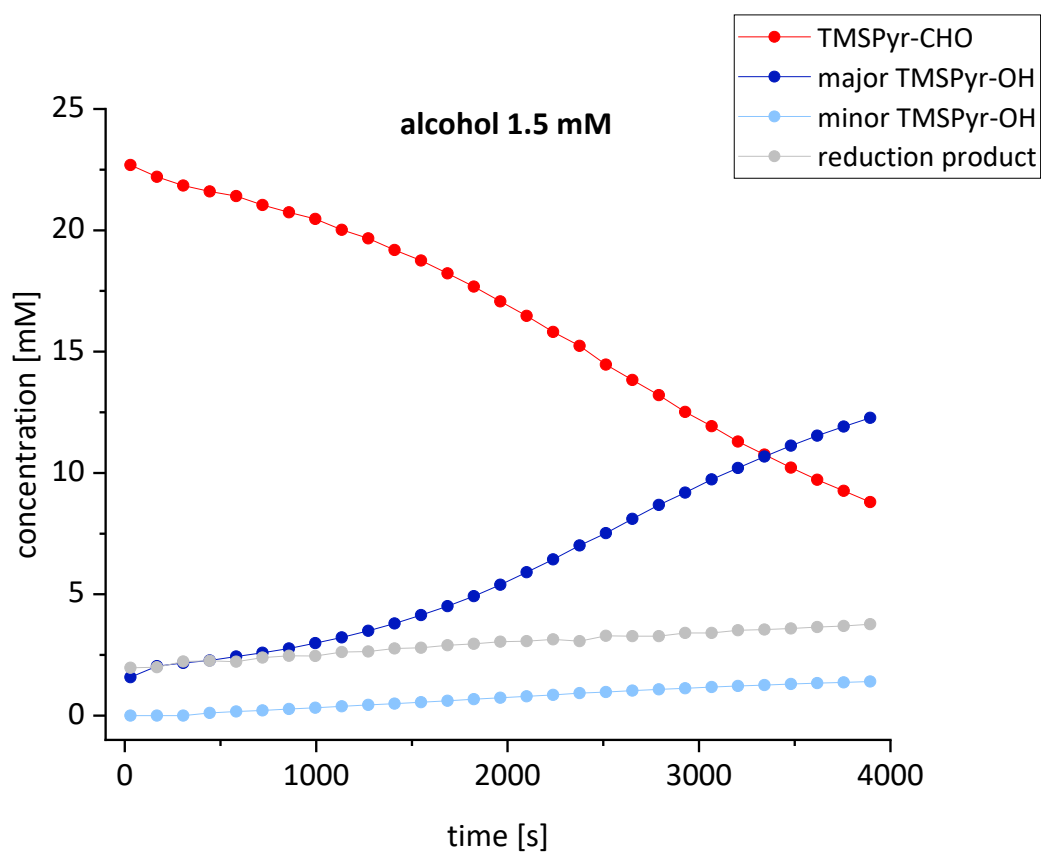

**Fig. 4.2.9:** Concentration-time profile of the *Soai* reaction in toluene (25 mM 6-((trimethylsilyl)ethynyl)nicotinaldehyde **TMSPyr-CHO**, 1.5 mM (1*R*)-2-methyl-(6-((trimethylsilyl)ethynyl)pyridine-3-yl)propanol **TMSPyr-OH** (*ee* > 99.9%) and 40 mM *i*Pr<sub>2</sub>Zn; r.t.



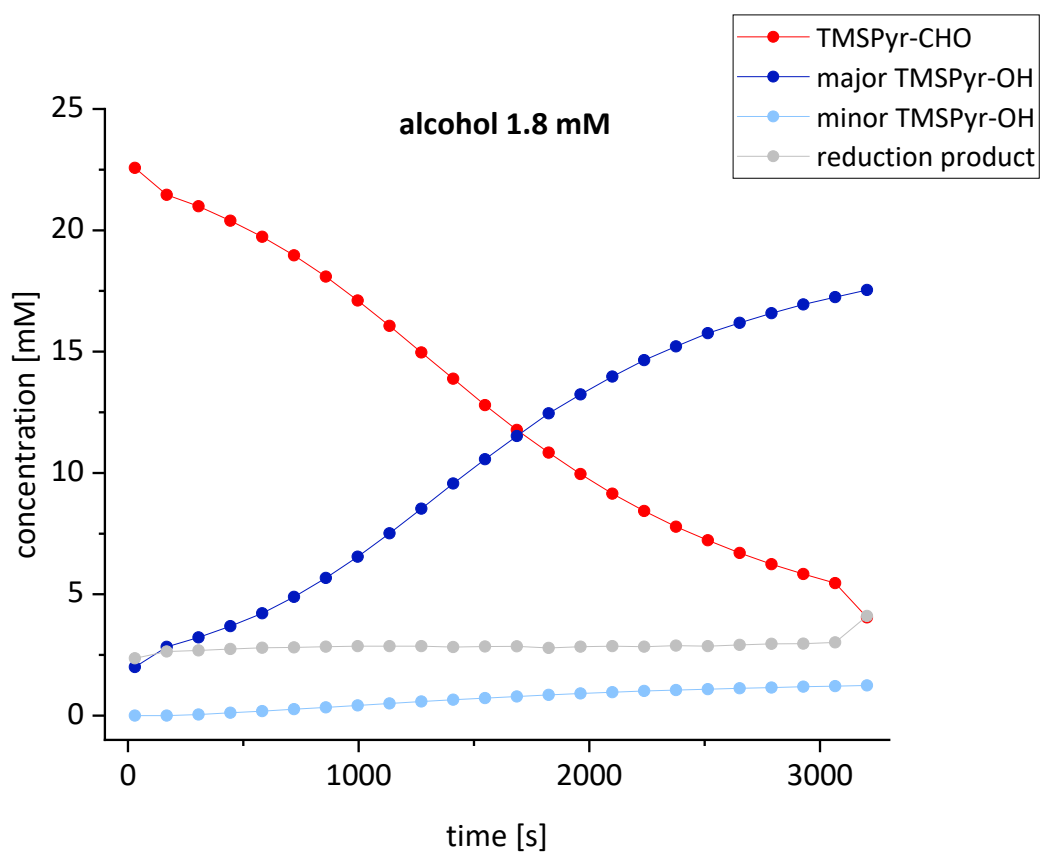

**Fig. 4.2.10:** Concentration-time profile of the *Soai* reaction in toluene (25 mM 6-((trimethylsilyl)ethynyl)nicotinaldehyde **TMSPyr-CHO**, 1.8 mM (1*R*)-2-methyl-(6-((trimethylsilyl)ethynyl)pyridine-3-yl)propanol **TMSPyr-OH** (*ee* > 99.9%) and 40 mM *i*Pr<sub>2</sub>Zn; r.t.

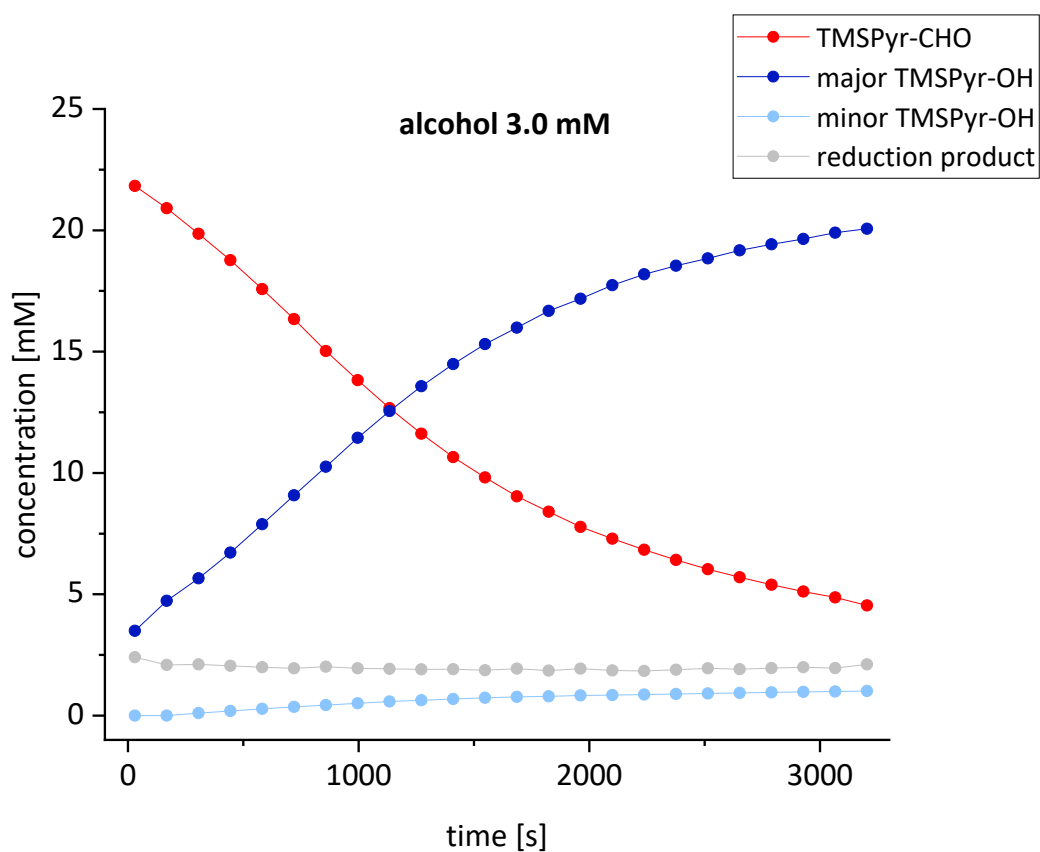

**Fig. 4.2.11:** Concentration-time profile of the *Soai* reaction in toluene (25 mM 6-((trimethylsilyl)ethynyl)nicotinaldehyde **TMSPyr-CHO**, 3.0 mM (1*R*)-2-methyl-(6-((trimethylsilyl)ethynyl)pyridine-3-yl)propanol **TMSPyr-OH** (*ee* > 99.9%) and 40 mM *i*Pr<sub>2</sub>Zn; r.t.

#### 4.2.4 Determination of the Reaction Orders

##### a. Reaction Order for aldehyde TMSPyr-CHO

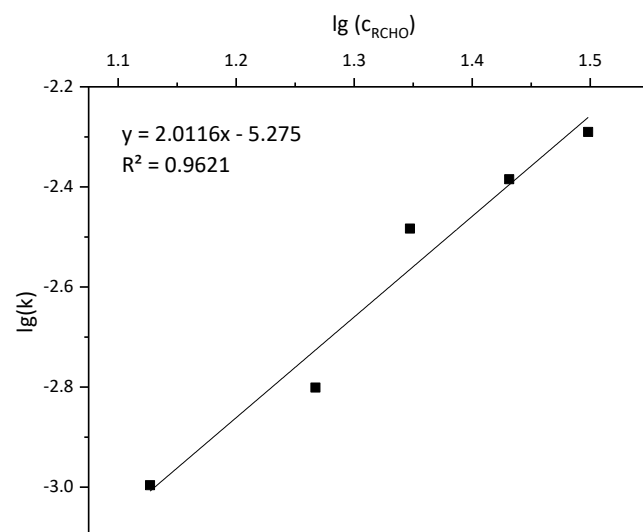

**Fig. 4.2.12:** Determination of the reaction order of **TMSPyr-CHO** by linear regression analysis of  $\lg(k_0)$  vs.  $\lg(c_{\text{aldehyde}})$ .

##### b. Reaction Order for alcohol TMSPyr-OH

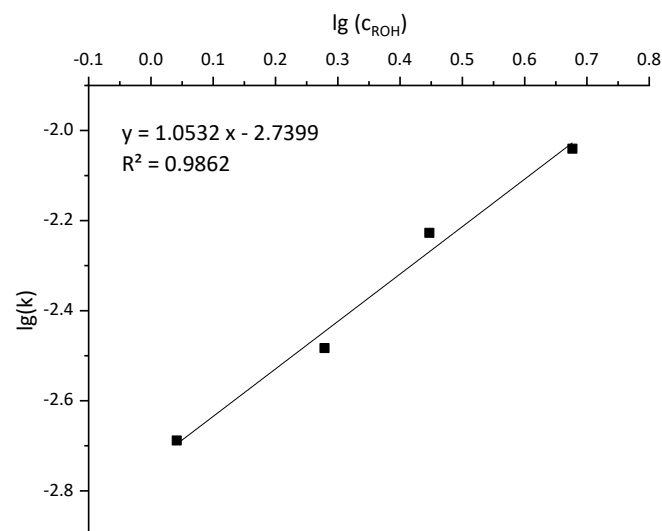

**Fig. 4.2.13:** Determination of the reaction order of **TMSPyr-OH** by linear regression analysis of  $\lg(k_0)$  vs.  $\lg(c_{\text{alcohol}})$ .

### 4.3 AdPyr-CHO/AdPyr-OH System

#### 4.3.1 Calibration plots for quantitative analysis of kinetic measurements

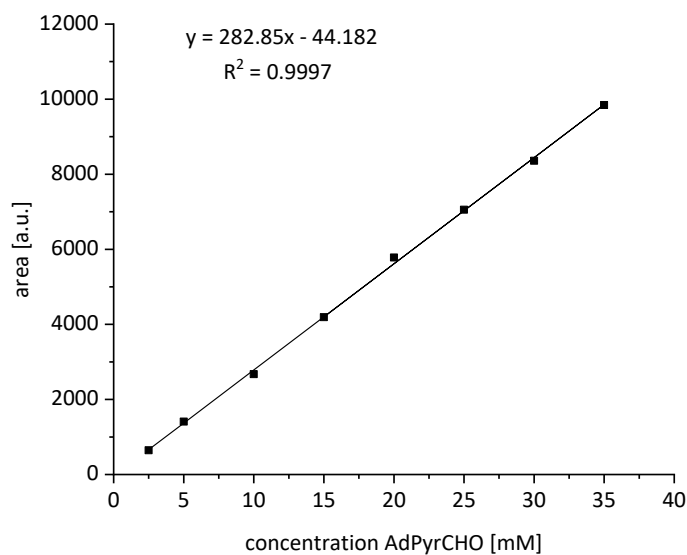

**Fig. 4.3.1:** Calibration plot on HPLC for **AdPyr-CHO** on a Chiralpak ID® column (250 mm, i.D. 4.6 mm, particle size: 5  $\mu$ m), *n*-hexane/THF = 75/25, 1.0 mL/min,  $\lambda$  = 250 nm, r.t.

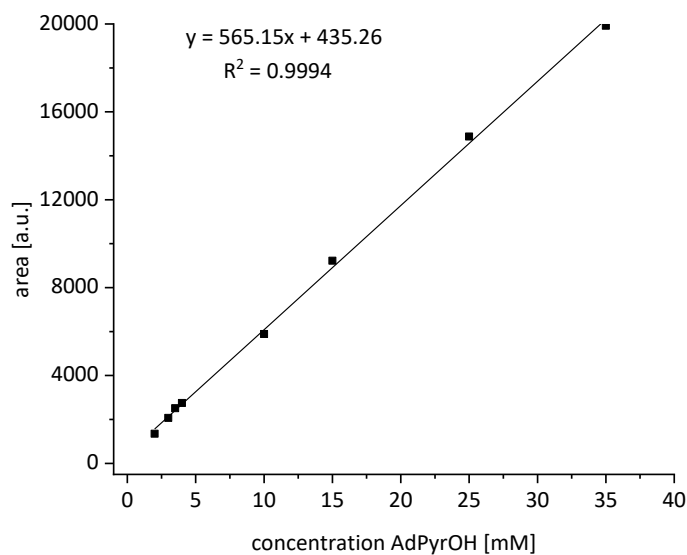

**Fig. 4.3.2:** Calibration plot on HPLC for **AdPyr-OH** on a Chiralpak ID® column (250 mm, i.D. 4.6 mm, particle size: 5  $\mu$ m), *n*-hexane/THF = 75/25, 1.0 mL/min,  $\lambda$  = 250 nm, r.t.

#### 4.3.2 Variation of the AdPyr-CHO concentration

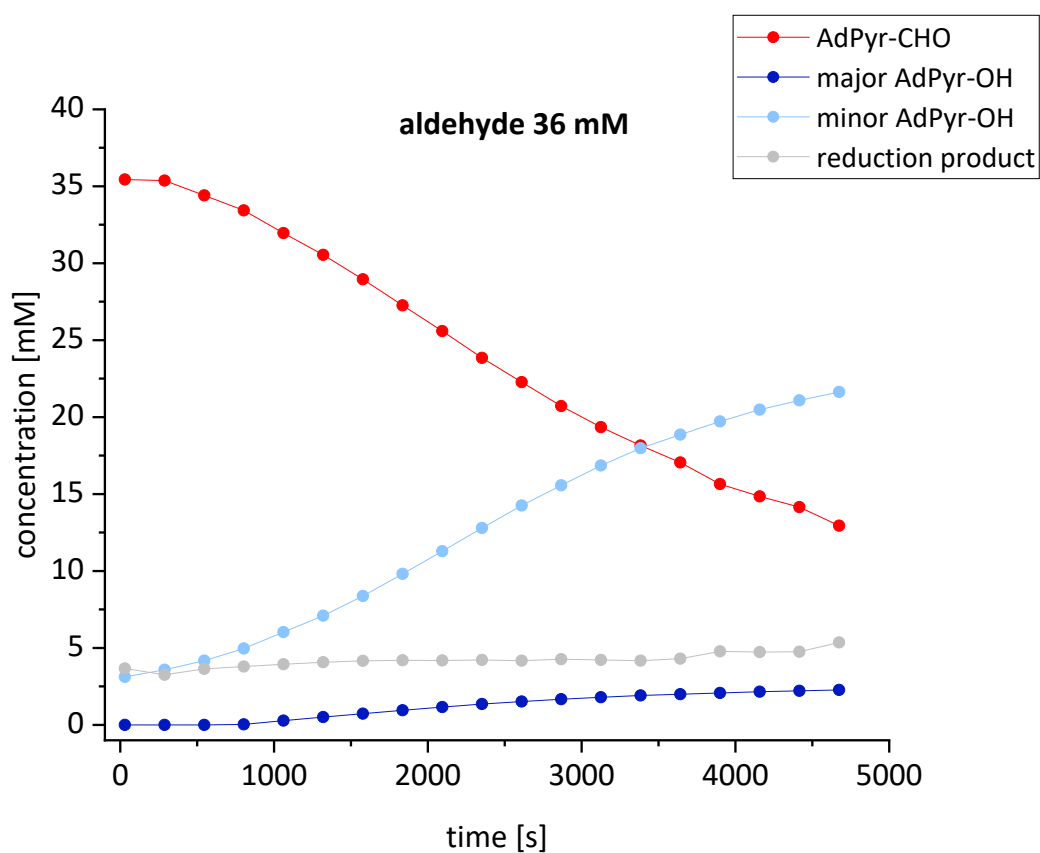

**Fig. 4.3.3:** Concentration-time profile of the *Soai* reaction in toluene (36 mM 6-((adamantan-1-yl)ethynyl)nicotinaldehyde **AdPyr-CHO**, 3.0 mM (1*R*)-1-(6-((adamantan-1-yl)ethynyl)pyridin-3-yl)-2-methylpropan-1-ol **AdPyr-OH** (*ee* > 99.9%) and 40 mM *i*Pr<sub>2</sub>Zn; r.t.

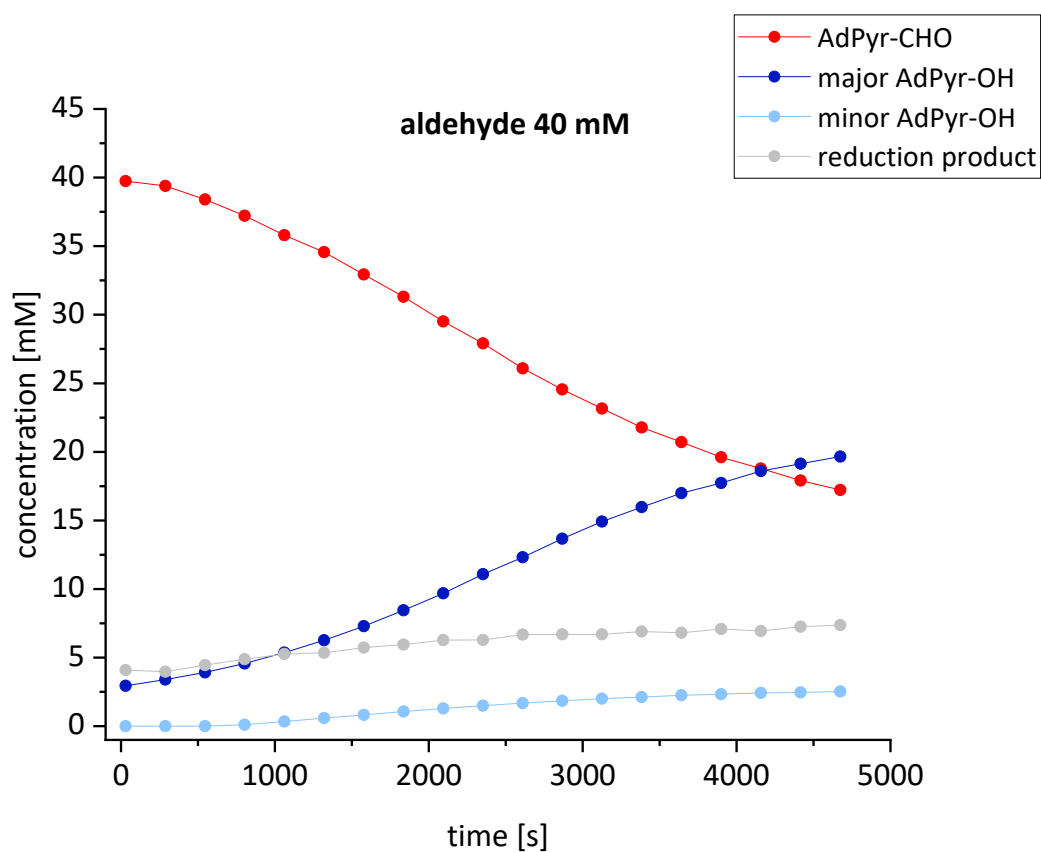

**Fig. 4.3.4:** Concentration-time profile of the *Soai* reaction in toluene (40 mM 6-((adamantan-1-yl)ethynyl)nicotinaldehyde **AdPyr-CHO**, 3.0 mM (1*R*)-1-(6-((adamantan-1-yl)ethynyl)pyridin-3-yl)-2-methylpropan-1-ol **AdPyr-OH** (*ee* > 99.9%) and 40 mM *i*Pr<sub>2</sub>Zn; r.t.

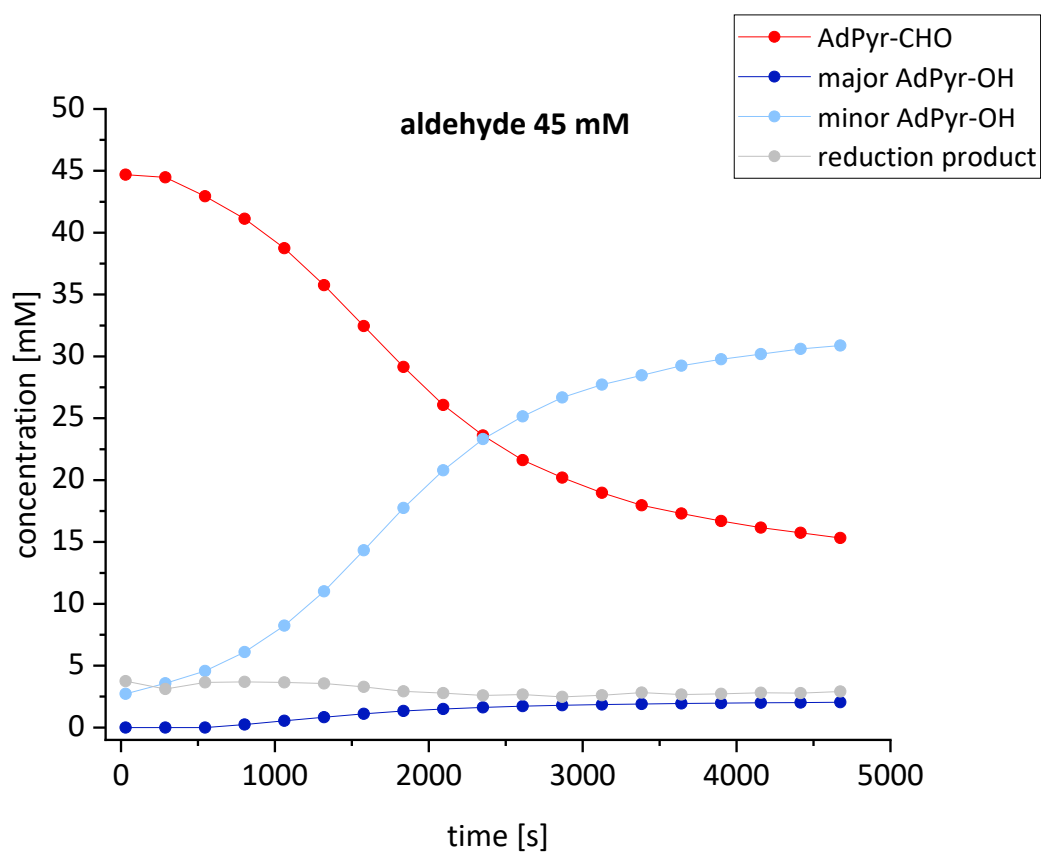

**Fig. 4.3.5:** Concentration-time profile of the *Soai* reaction in toluene (45 mM 6-((adamantan-1-yl)ethynyl)nicotinaldehyde **AdPyr-CHO**, 3.0 mM (1*R*)-1-(6-((adamantan-1-yl)ethynyl)pyridin-3-yl)-2-methylpropan-1-ol **AdPyr-OH** (*ee* > 99.9%) and 40 mM *i*Pr<sub>2</sub>Zn; r.t.

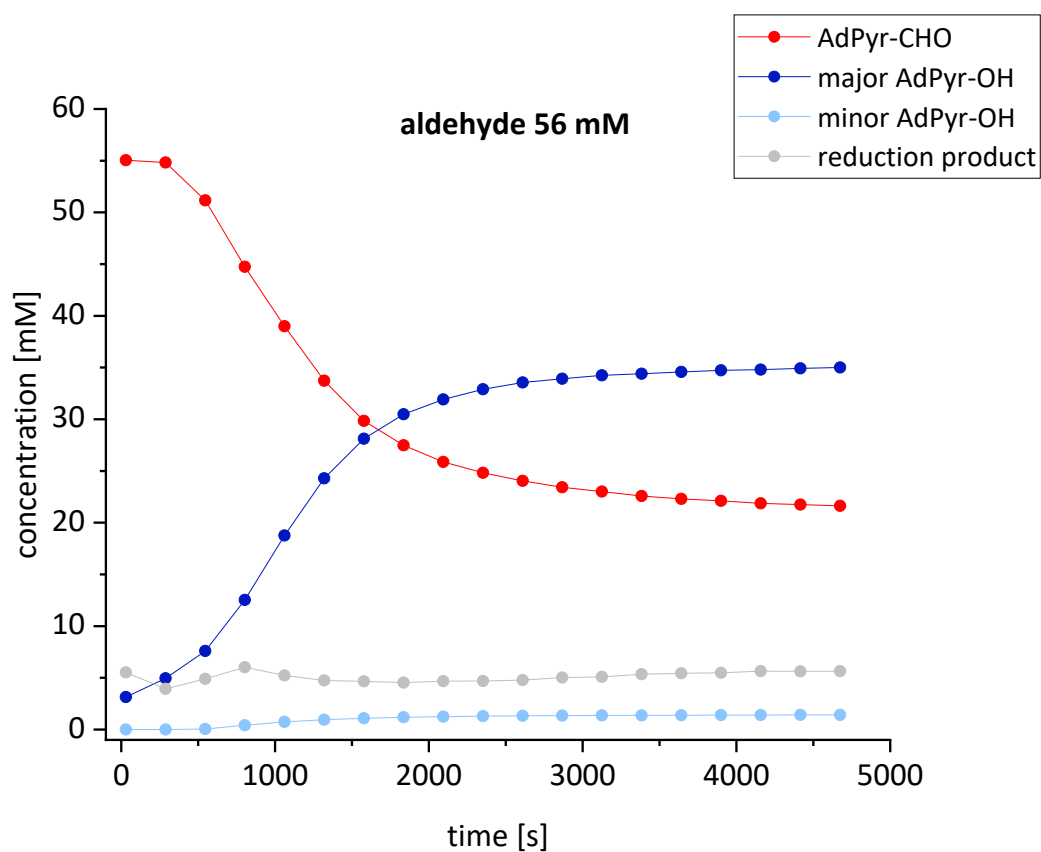

**Fig. 4.3.6:** Concentration-time profile of the *Soai* reaction in toluene (56 mM 6-((adamantan-1-yl)ethynyl)nicotinaldehyde **AdPyr-CHO**, 3.0 mM (1*R*)-1-(6-((adamantan-1-yl)ethynyl)pyridin-3-yl)-2-methylpropan-1-ol **AdPyr-OH** (*ee* > 99.9%) and 40 mM *i*Pr<sub>2</sub>Zn; r.t.



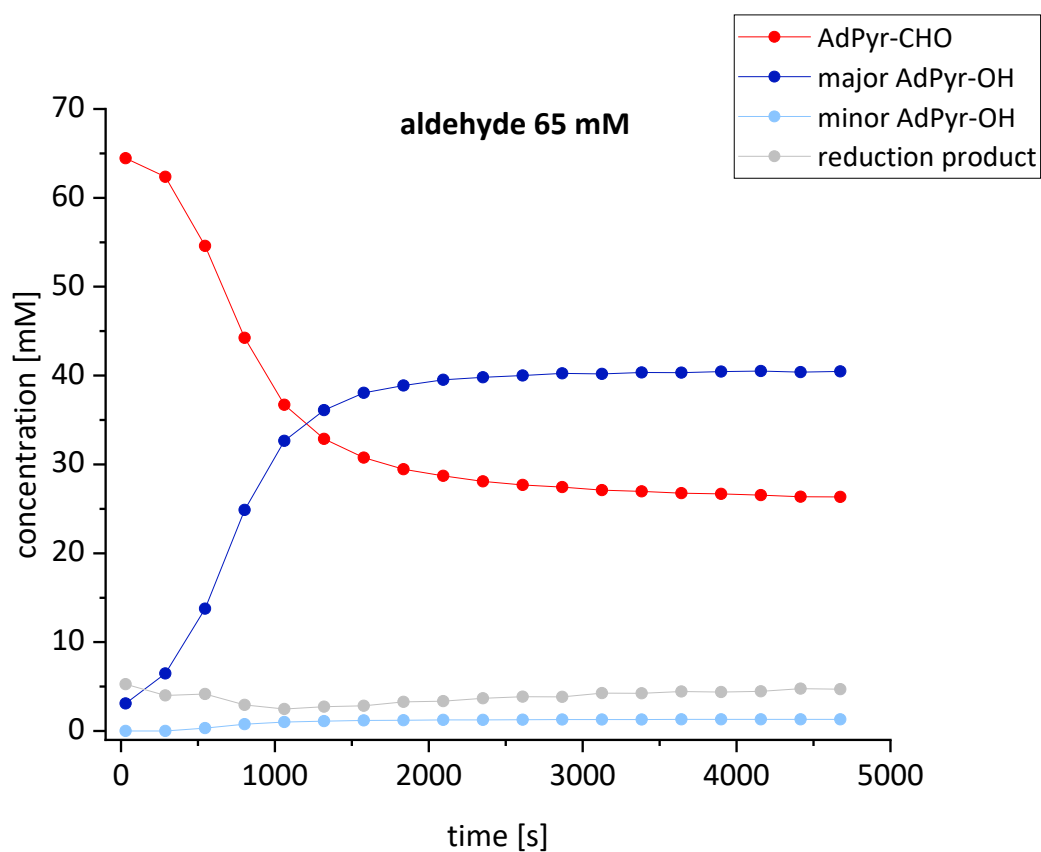

**Fig. 4.3.7:** Concentration-time profile of the *Soai* reaction in toluene (65 mM 6-((adamantan-1-yl)ethynyl)nicotinaldehyde **AdPyr-CHO**, 3.0 mM (1*R*)-1-(6-((adamantan-1-yl)ethynyl)pyridin-3-yl)-2-methylpropan-1-ol **AdPyr-OH** (*ee* > 99.9%) and 40 mM *i*Pr<sub>2</sub>Zn; r.t.

#### 4.3.3 Variation of the AdPyr-OH concentration

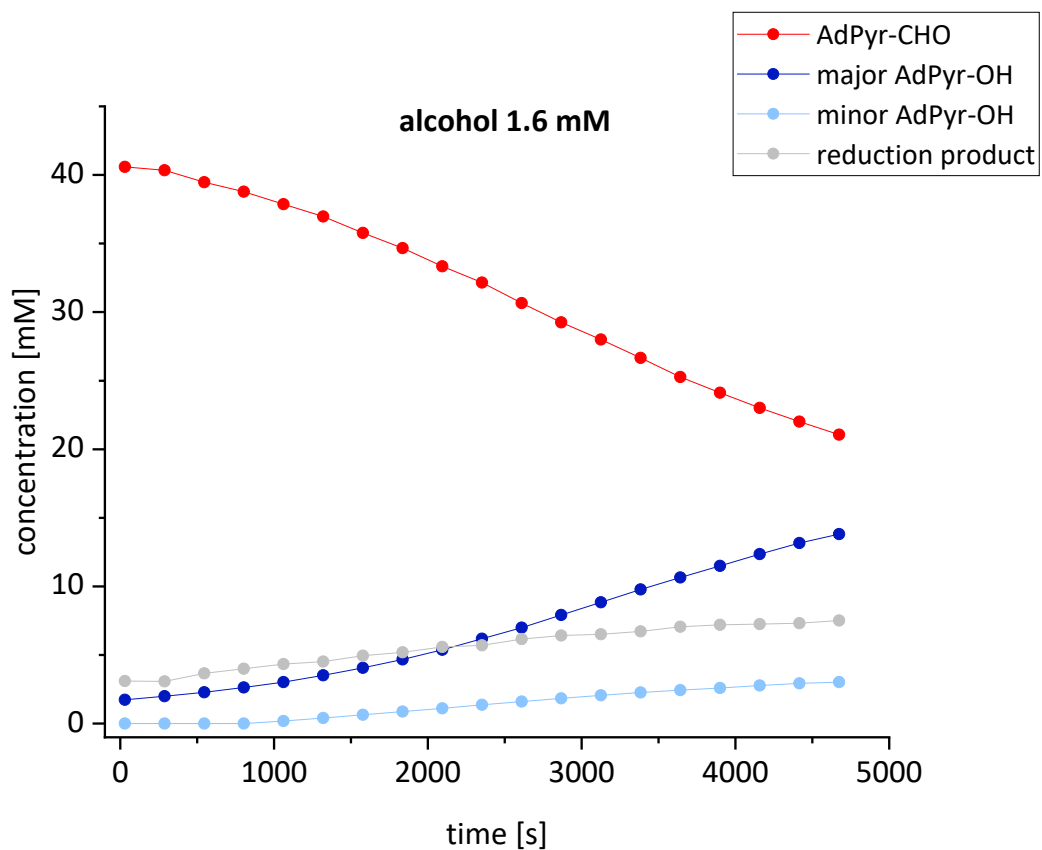

**Fig. 4.3.8:** Concentration-time profile of the *Soai* reaction in toluene (40 mM 6-((adamantan-1-yl)ethynyl)nicotinaldehyde **AdPyr-CHO**, 1.6 mM (1*R*)-1-(6-((adamantan-1-yl)ethynyl)pyridin-3-yl)-2-methylpropan-1-ol **AdPyr-OH** (*ee* > 99.9%) and 40 mM *i*Pr<sub>2</sub>Zn; r.t.

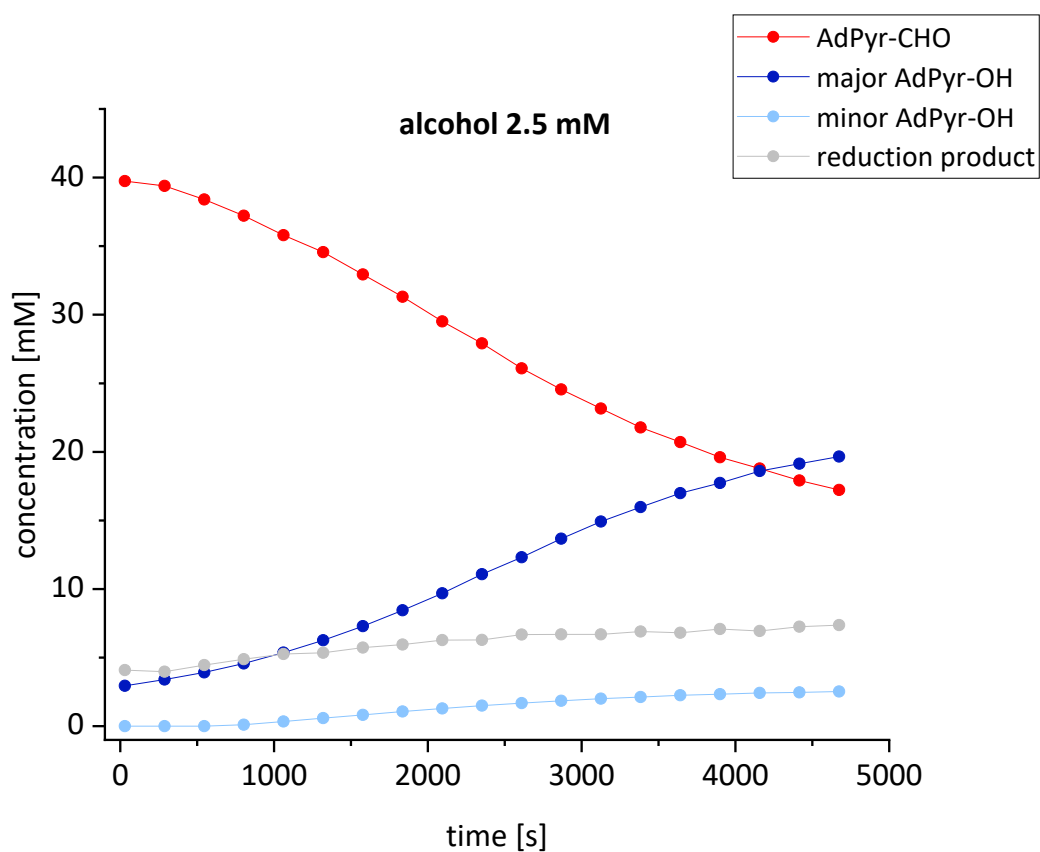

**Fig. 4.3.9:** Concentration-time profile of the *Soai* reaction in toluene (40 mM 6-((adamantan-1-yl)ethynyl)nicotinaldehyde **AdPyr-CHO**, 2.5 mM (1*R*)-1-(6-((adamantan-1-yl)ethynyl)pyridin-3-yl)-2-methylpropan-1-ol **AdPyr-OH** (*ee* > 99.9%) and 40 mM *i*Pr<sub>2</sub>Zn; r.t.

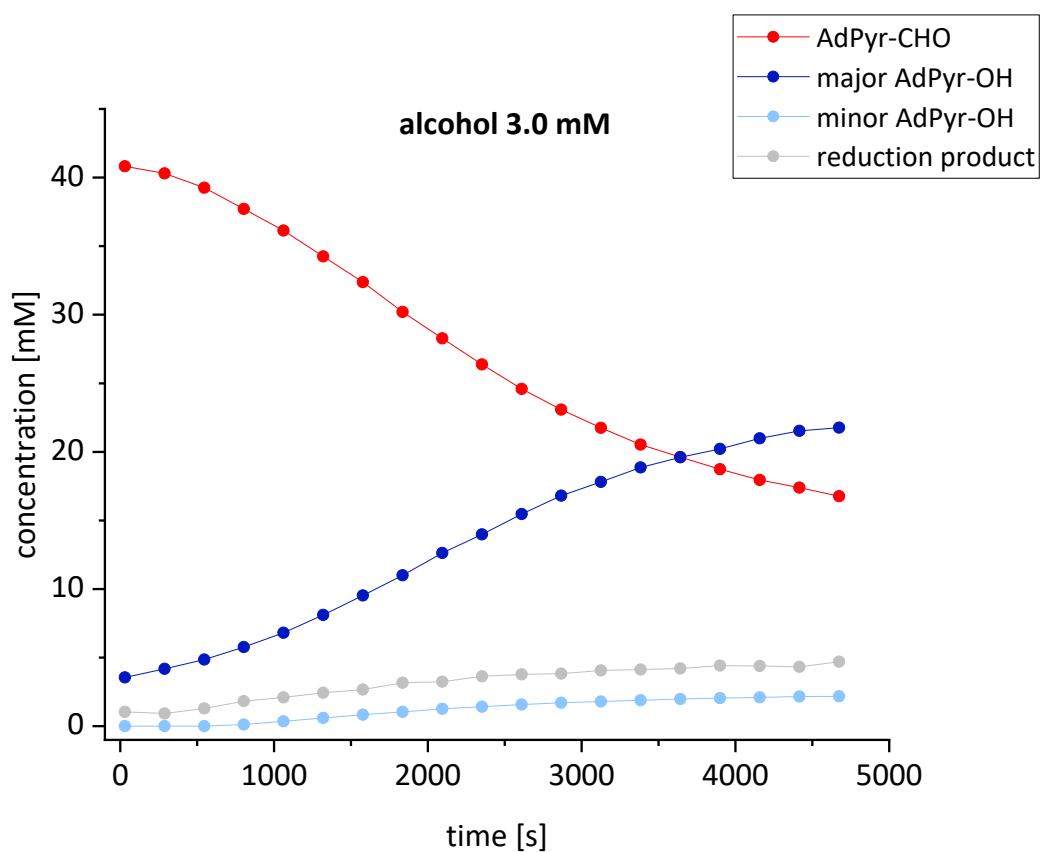

**Fig. 4.3.10:** Concentration-time profile of the *Soai* reaction in toluene (40 mM 6-((adamantan-1-yl)ethynyl)nicotinaldehyde **AdPyr-CHO**, 3.0 mM (1*R*)-1-(6-((adamantan-1-yl)ethynyl)pyridin-3-yl)-2-methylpropan-1-ol **AdPyr-OH** (*ee* > 99.9%) and 40 mM *i*Pr<sub>2</sub>Zn; r.t.

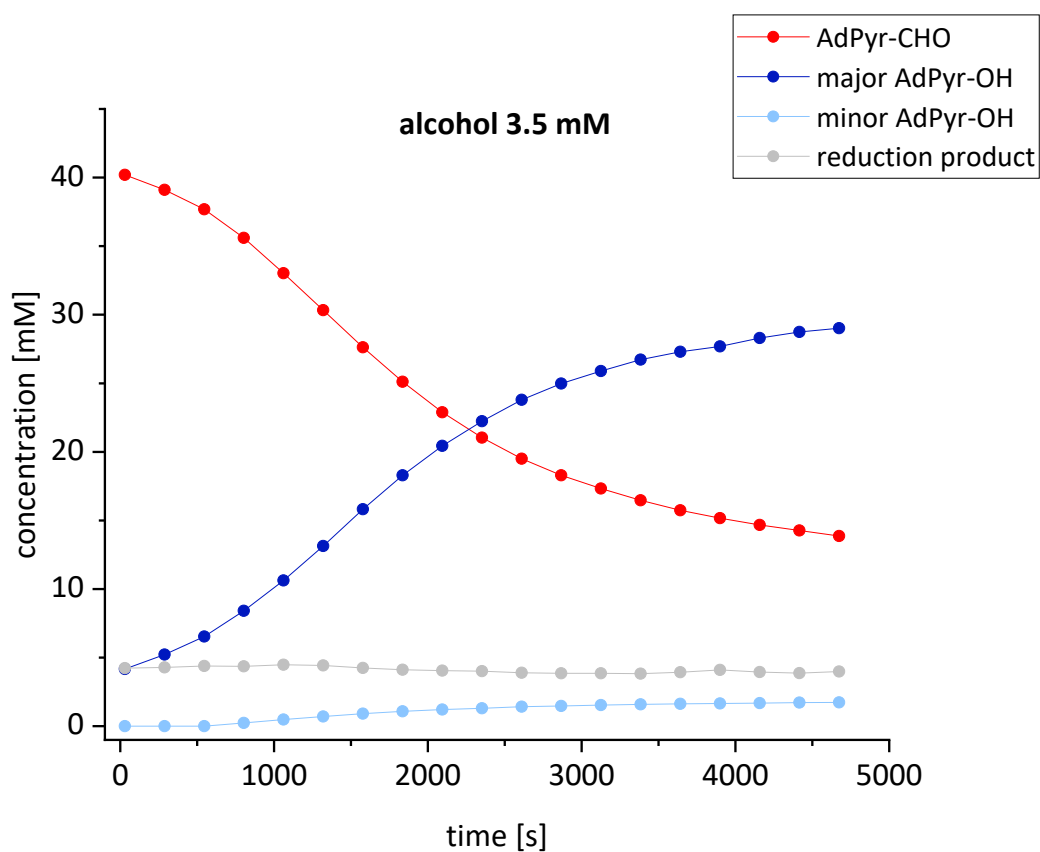

**Fig. 4.3.11:** Concentration-time profile of the *Soai* reaction in toluene (40 mM 6-((adamantan-1-yl)ethynyl)nicotinaldehyde **AdPyr-CHO**, 3.5 mM (1*R*)-1-(6-((adamantan-1-yl)ethynyl)pyridin-3-yl)-2-methylpropan-1-ol **AdPyr-OH** (*ee* > 99.9%) and 40 mM *i*Pr<sub>2</sub>Zn; r.t.

#### 4.3.4 Determination of the Reaction Orders

##### a. Reaction Order for aldehyde AdPyr-CHO

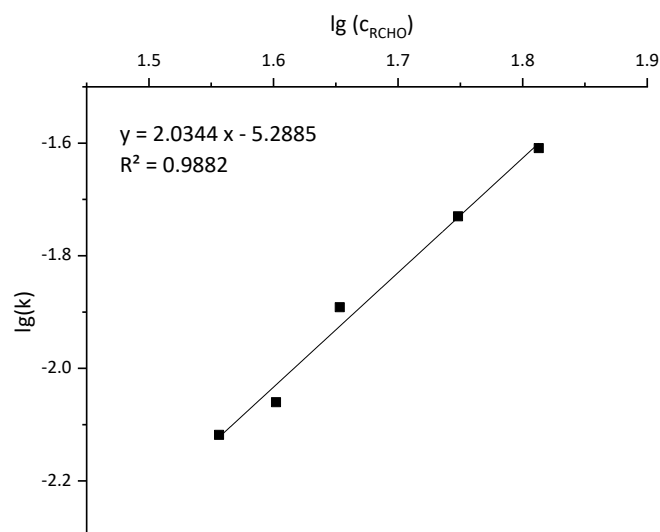

**Fig. 4.3.12:** Determination of the reaction order of **AdPyr-OH** by linear regression analysis of  $\lg(k_0)$  vs.  $\lg(c_{\text{aldehyde}})$ .

##### b. Reaction Order for alcohol AdPyr-OH

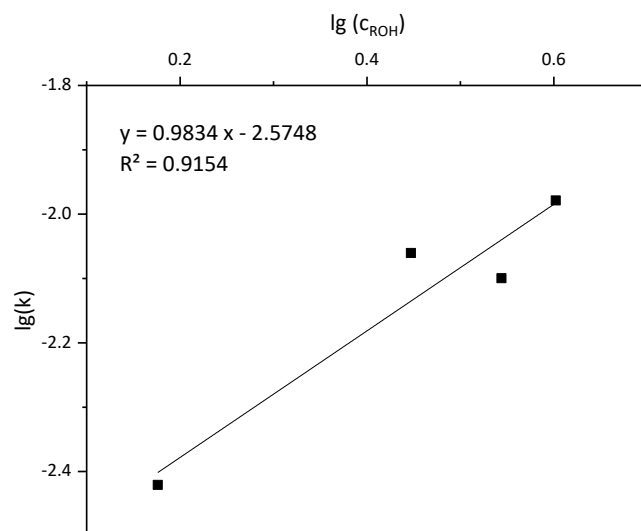

**Fig. 4.3.13:** Determination of the reaction order of **AdPyr-OH** by linear regression analysis of  $\lg(k_0)$  vs.  $\lg(c_{\text{alcohol}})$ .

## 4.4 AdPym-CHO/AdPym-OH System

### 4.4.1 Calibration plots for quantitative analysis of kinetic measurements

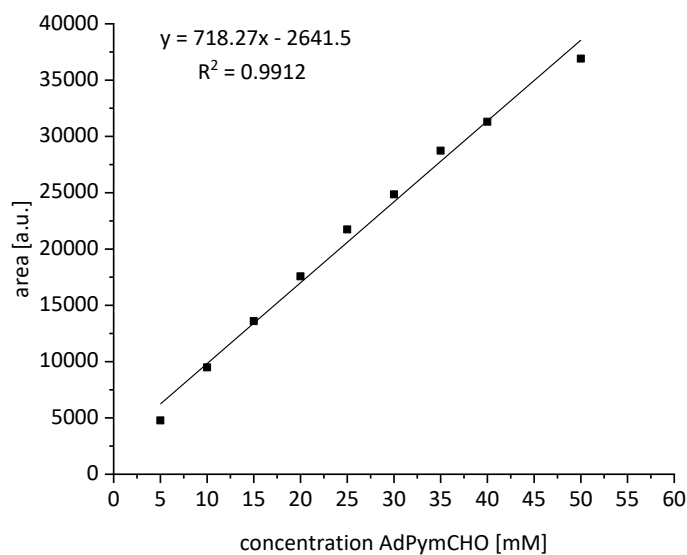

**Fig. 4.4.1:** Calibration plot on HPLC for **AdPym-CHO** on a Chiralpak IC<sup>®</sup> column (250 mm, i.D. 20 mm, particle size: 5  $\mu$ m), *n*-hexane/THF = 75/25, 1.0 mL/min,  $\lambda$  = 280 nm, r.t.

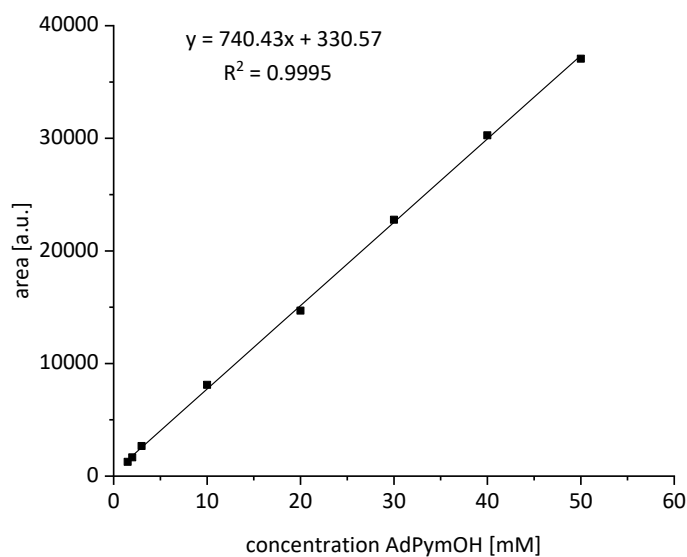

**Fig. 4.4.2:** Calibration plot on HPLC for **AdPym-OH** on a Chiralpak IC<sup>®</sup> column (250 mm, i.D. 20 mm, particle size: 5  $\mu$ m), *n*-hexane/THF = 75/25, 1.0 mL/min,  $\lambda$  = 250 nm, r.t.

#### 4.4.2 Variation of the AdPym-CHO concentration

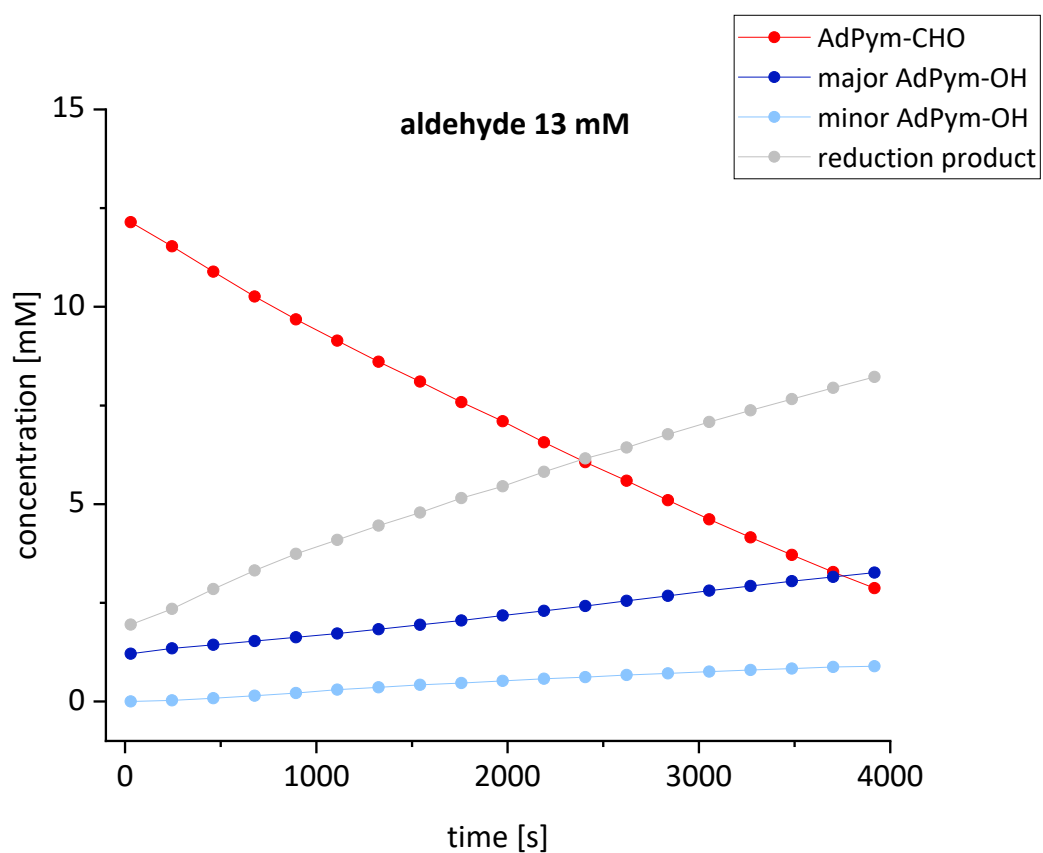

**Fig. 4.4.3:** Concentration-time profile of the *Soai* reaction in toluene (13 mM 2-((adamantan-1-yl)ethynyl)pyrimidine-5-carbaldehyde **AdPym-CHO**, 1.5 mM (1*R*)-1-(2-((adamantan-1-yl)ethynyl)pyrimidin-5-yl)-2-methylpropan-1-ol **AdPym-OH** (*ee* > 99.9%) and 40 mM *i*Pr<sub>2</sub>Zn; r.t.



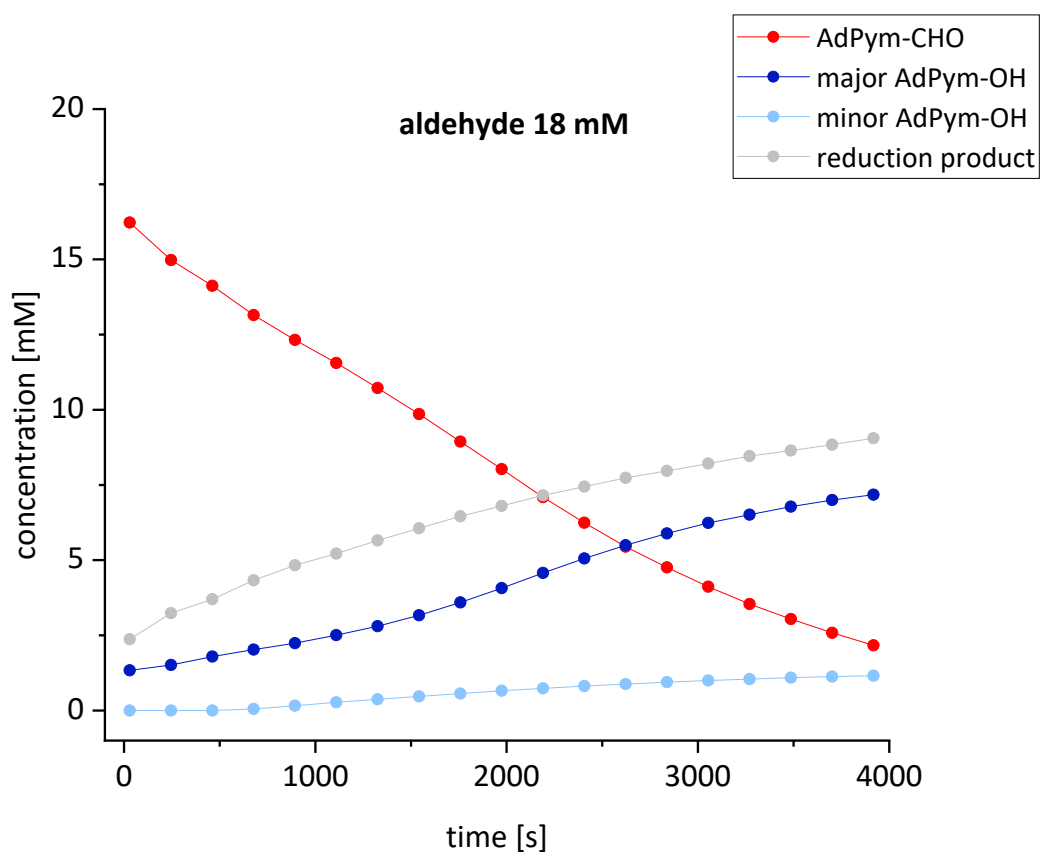

**Fig. 4.4.5:** Concentration-time profile of the *Soai* reaction in toluene (18 mM 2-((adamantan-1-yl)ethynyl)pyrimidine-5-carbaldehyde **AdPym-CHO**, 1.5 mM (1*R*)-1-(2-((adamantan-1-yl)ethynyl)pyrimidin-5-yl)-2-methylpropan-1-ol **AdPym-OH** (*ee* > 99.9%) and 40 mM *i*Pr<sub>2</sub>Zn; r.t.

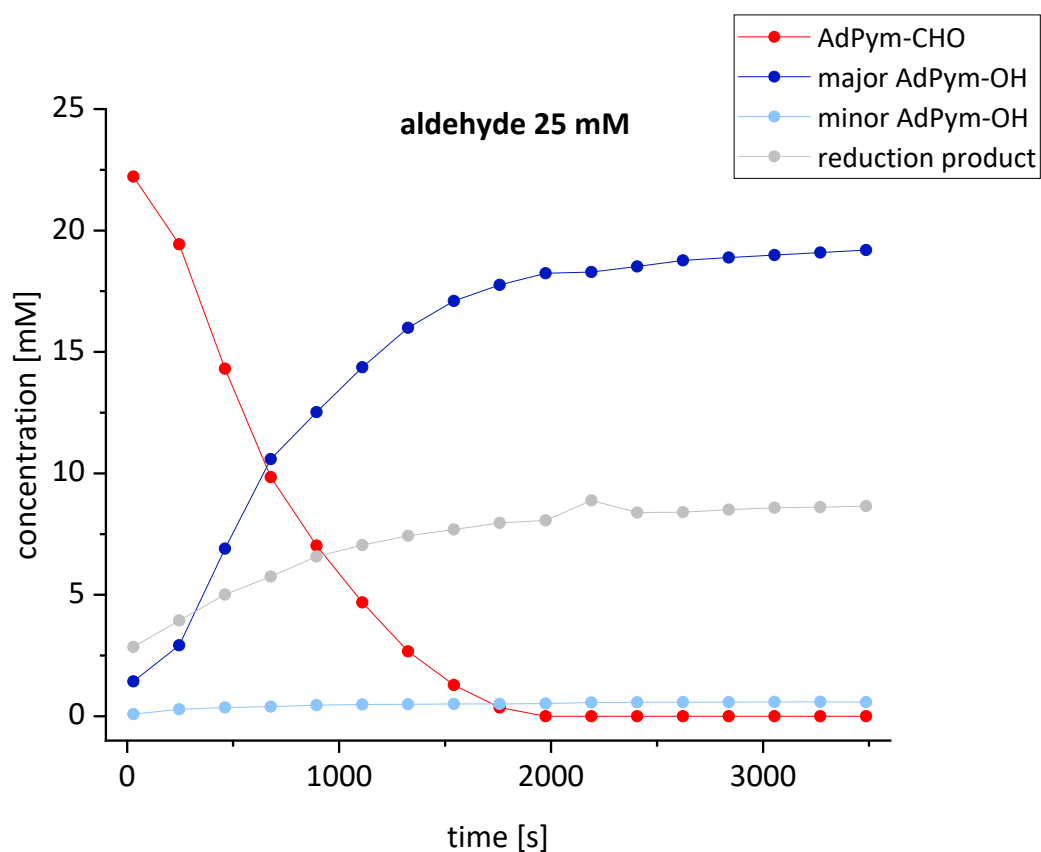

**Fig. 4.4.6:** Concentration-time profile of the *Soai* reaction in toluene (25 mM 2-((adamantan-1-yl)ethynyl)pyrimidine-5-carbaldehyde **AdPym-CHO**, 1.5 mM (1*R*)-1-(2-((adamantan-1-yl)ethynyl)pyrimidin-5-yl)-2-methylpropan-1-ol **AdPym-OH** (*ee* > 99.9%) and 40 mM *i*Pr<sub>2</sub>Zn; r.t.

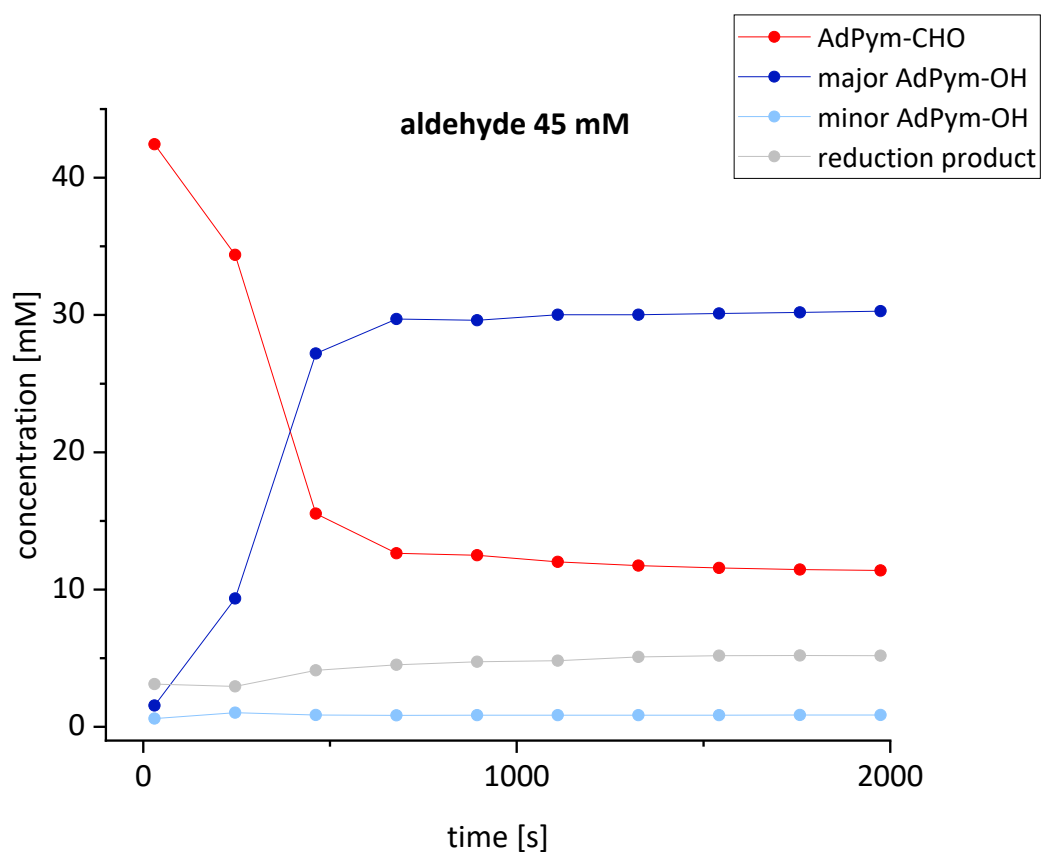

**Fig. 4.4.7:** Concentration-time profile of the *Soai* reaction in toluene (45 mM 2-((adamantan-1-yl)ethynyl)pyrimidine-5-carbaldehyde **AdPym-CHO**, 1.5 mM (1*R*)-1-(2-((adamantan-1-yl)ethynyl)pyrimidin-5-yl)-2-methylpropan-1-ol **AdPym-OH** (*ee* > 99.9%) and 40 mM *i*Pr<sub>2</sub>Zn; r.t.

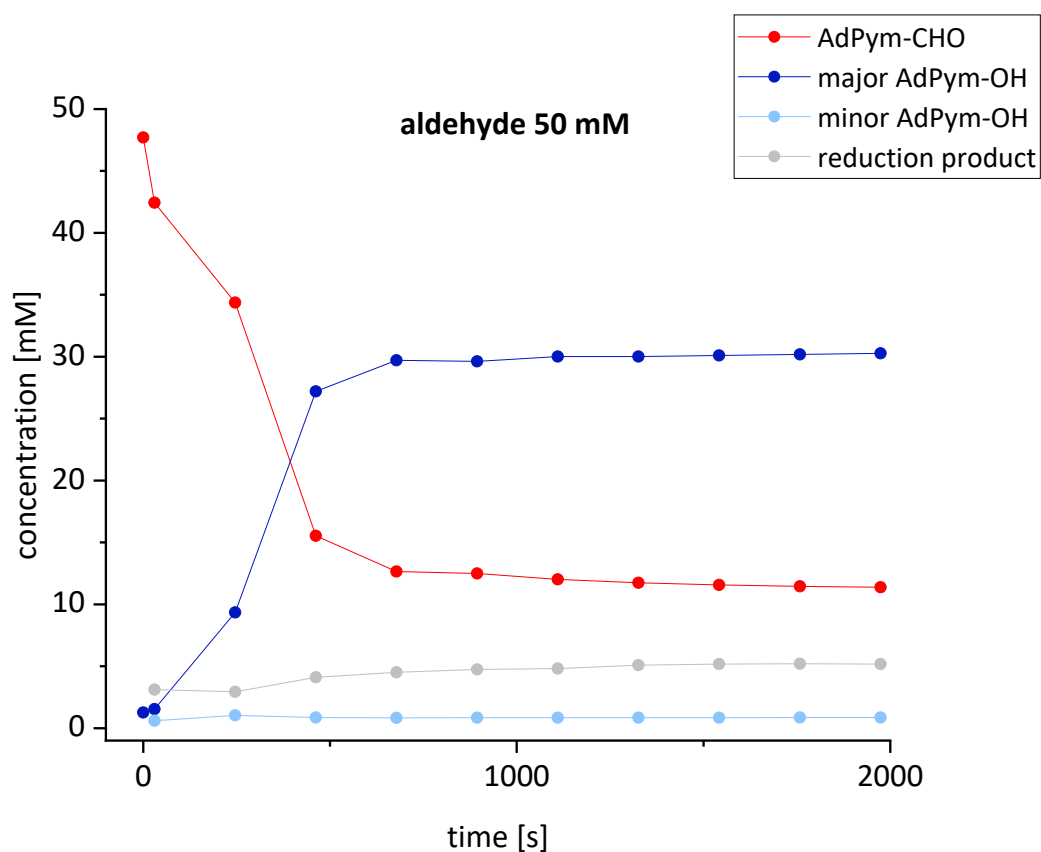

**Fig. 4.4.8:** Concentration-time profile of the *Soai* reaction in toluene (50 mM 2-((adamantan-1-yl)ethynyl)pyrimidine-5-carbaldehyde **AdPym-CHO**, 1.5 mM (1*R*)-1-(2-((adamantan-1-yl)ethynyl)pyrimidin-5-yl)-2-methylpropan-1-ol **AdPym-OH** (*ee* > 99.9%) and 40 mM *i*Pr<sub>2</sub>Zn; r.t.

#### 4.4.3 Variation of the AdPym-OH concentration

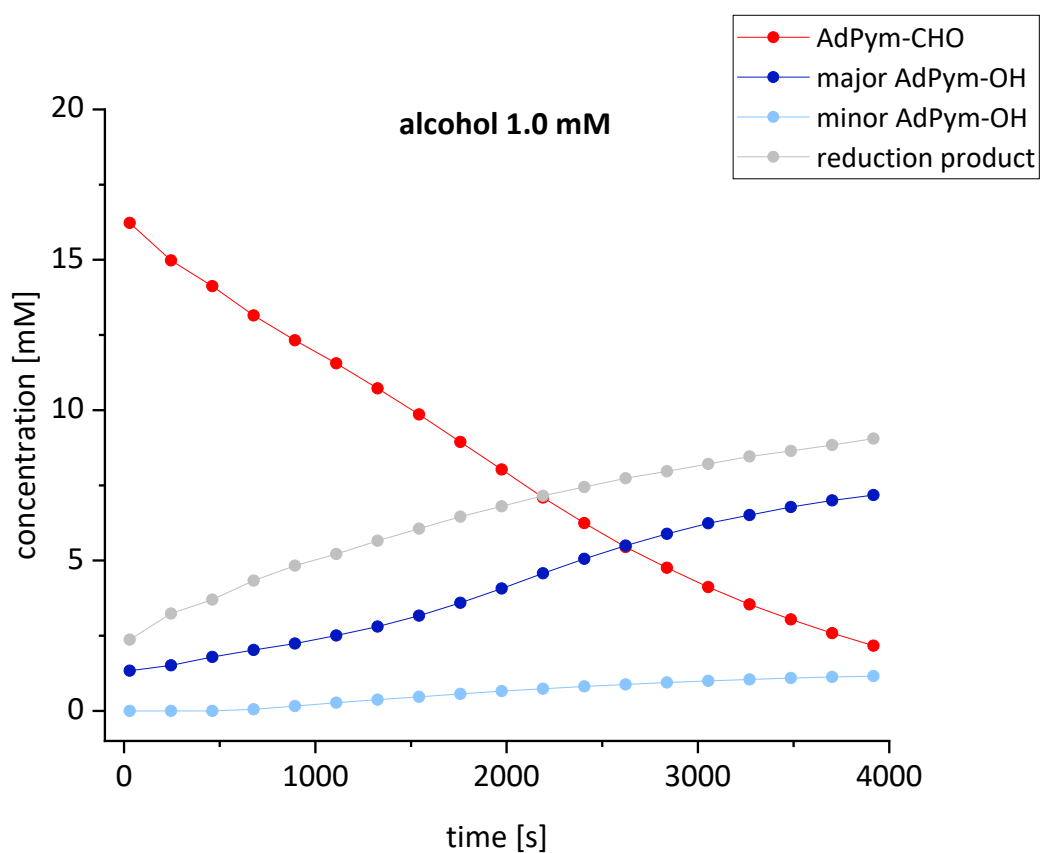

**Fig. 4.4.9:** Concentration-time profile of the *Soai* reaction in toluene (20 mM 2-((adamantan-1-yl)ethynyl)pyrimidine-5-carbaldehyde **AdPym-CHO**, 1.0 mM (1*R*)-1-(2-((adamantan-1-yl)ethynyl)pyrimidin-5-yl)-2-methylpropan-1-ol **AdPym-OH** (*ee* > 99.9%) and 40 mM *i*Pr<sub>2</sub>Zn; r.t.

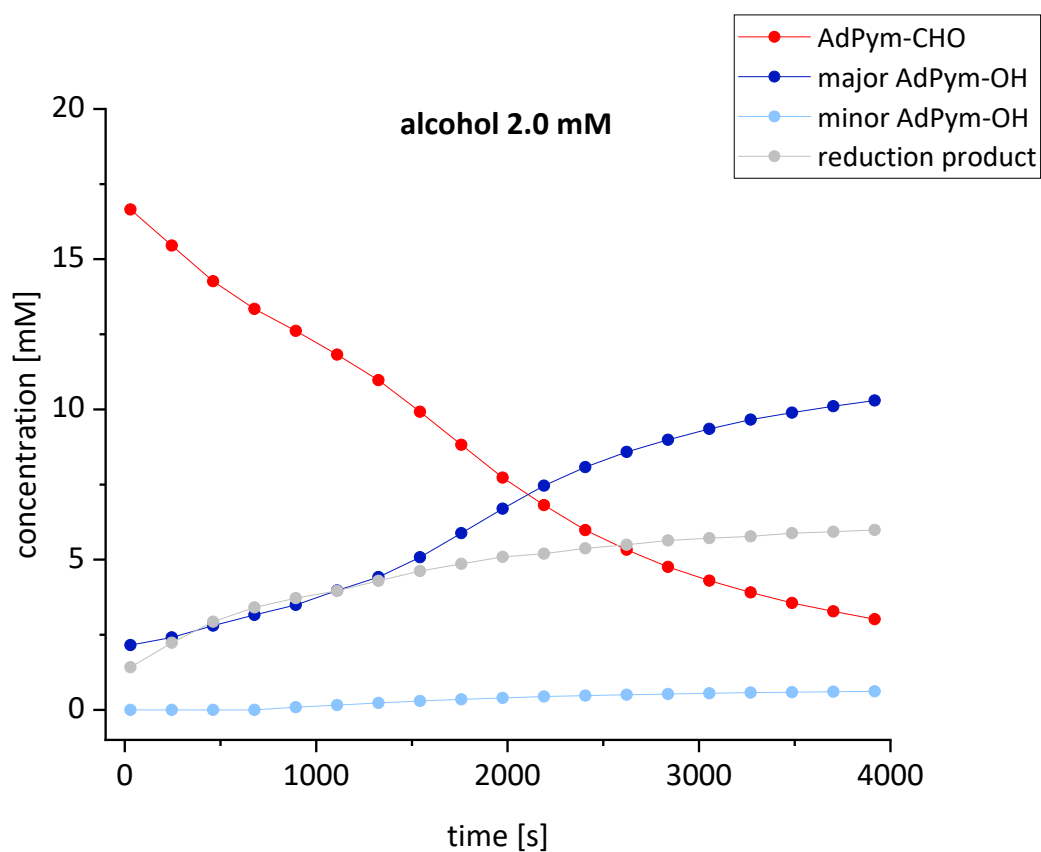

**Fig. 4.4.10:** Concentration-time profile of the *Soai* reaction in toluene (20 mM 2-((adamantan-1-yl)ethynyl)pyrimidine-5-carbaldehyde **AdPym-CHO**, 2.0 mM (1*R*)-1-(2-((adamantan-1-yl)ethynyl)pyrimidin-5-yl)-2-methylpropan-1-ol **AdPym-OH** (*ee* > 99.9%) and 40 mM *i*Pr<sub>2</sub>Zn; r.t.

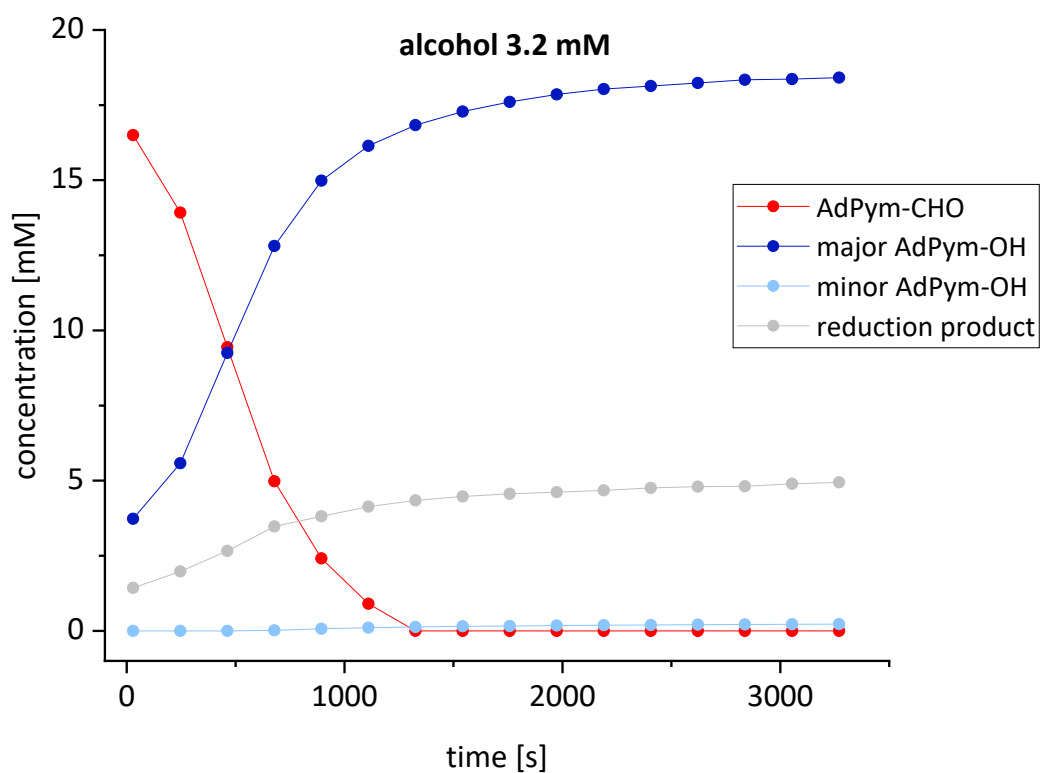

**Fig. 4.4.11:** Concentration-time profile of the *Soai* reaction in toluene (20 mM 2-((adamantan-1-yl)ethynyl)pyrimidine-5-carbaldehyde **AdPym-CHO**, 3.2 mM (1*R*)-1-(2-((adamantan-1-yl)ethynyl)pyrimidin-5-yl)-2-methylpropan-1-ol **AdPym-OH** (*ee* > 99.9%) and 40 mM *i*Pr<sub>2</sub>Zn; r.t.

#### 4.4.4 Determination of the Reaction Orders

##### a. Reaction Order for aldehyde AdPym-CHO

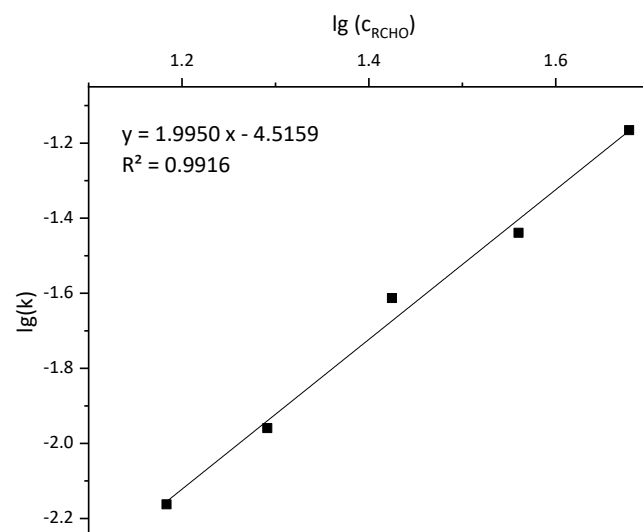

**Fig. 4.4.12:** Determination of the reaction order of **AdPym-OH** by linear regression analysis of  $\lg(k_0)$  vs.  $\lg(c_{\text{aldehyde}})$ .

##### b. Reaction Order for alcohol AdPym-OH

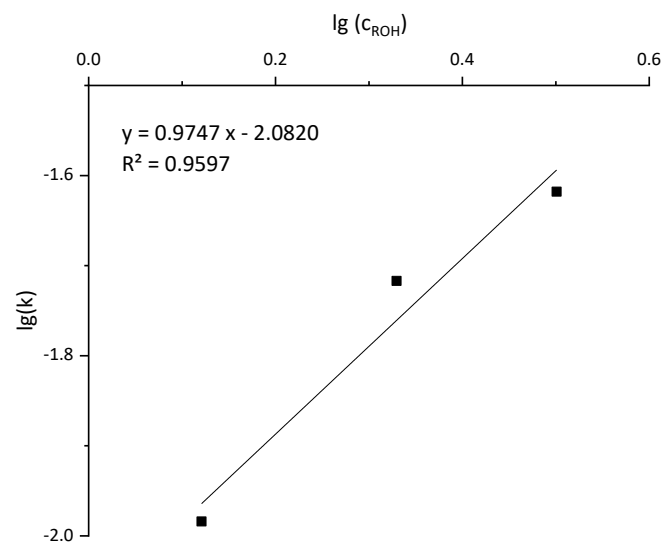

**Fig. 4.4.13:** Determination of the reaction order of **AdPym-OH** by linear regression analysis of  $\lg(k_0)$  vs.  $\lg(c_{\text{alcohol}})$ .



## 4.5 TMSPym-CHO/TMSPym-OH System

### 4.5.1 Calibration plots for quantitative analysis of kinetic measurements

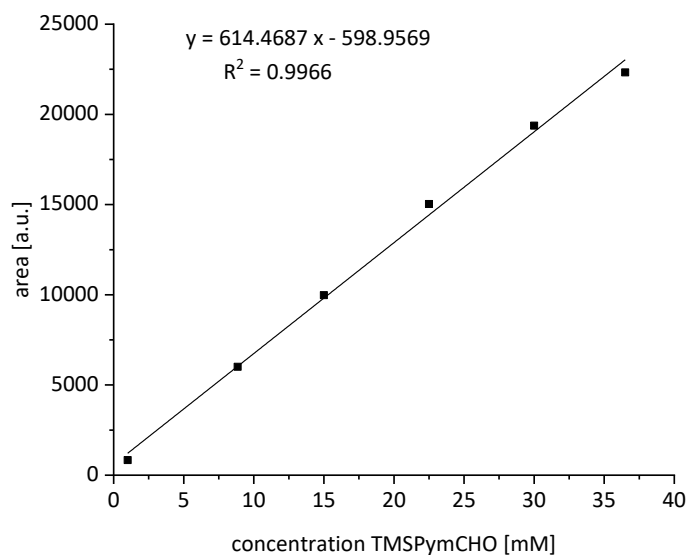

**Fig. 4.5.1:** Calibration plot on HPLC for **TMSPym-CHO** on a Chiralpak IB® column (250 mm, i.D. 4.6 mm, particle size: 5  $\mu$ m), *n*-hexane/THF = 70/30, 1.2 mL,  $\lambda$  = 280 nm, r.t.

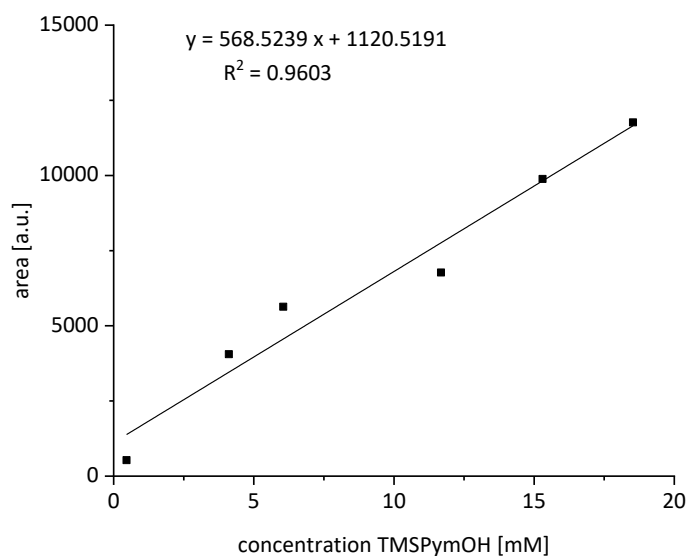

**Fig. 4.5.2:** Calibration plot on HPLC for **TMSPym-OH** on a Chiralpak IB® column (250 mm, i.D. 4.6 mm, particle size: 5  $\mu$ m), *n*-hexane/THF = 70/30, 1.2 mL,  $\lambda$  = 250 nm, r.t.

#### 4.5.2 Variation of the TMSPym-CHO concentration

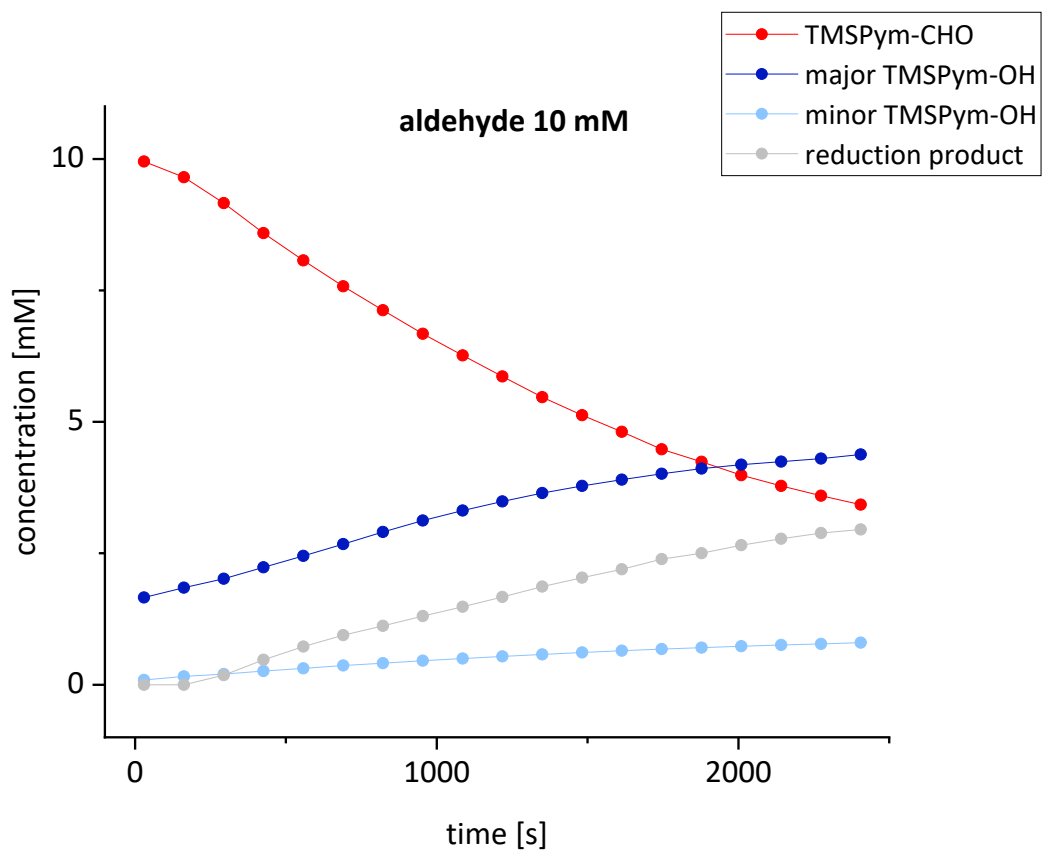

**Fig. 4.5.3:** Concentration-time profile of the *Soai* reaction in toluene (10 mM 2-((trimethylsilyl)ethynyl)pyrimidine-5-carbaldehyde **TMSPym-CHO**, 1.5 mM (1*R*)-2-methyl-1-(2-((trimethylsilyl)ethynyl)pyrimidin-5-yl)propan-1-ol **TMSPym-OH** (*ee* > 99.9%) and 40 mM *i*Pr<sub>2</sub>Zn; r.t.

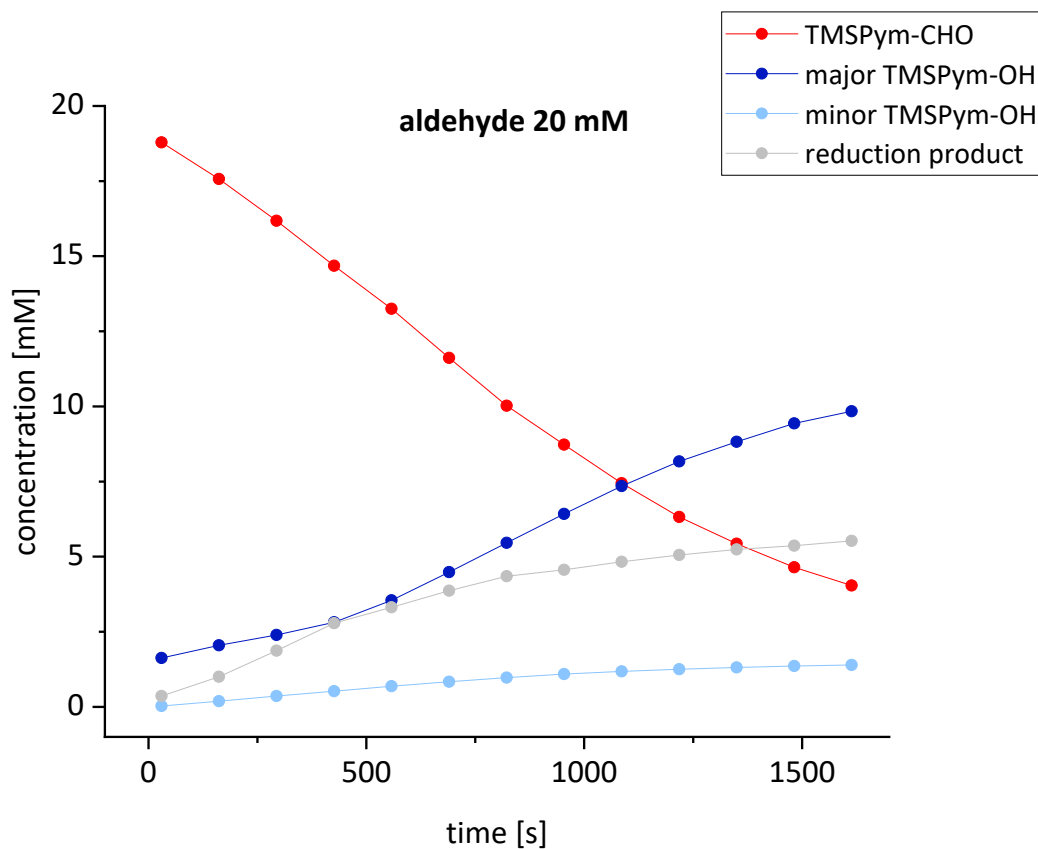

**Fig. 4.5.4:** Concentration-time profile of the *Soai* reaction in toluene (20 mM 2-((trimethylsilyl)ethynyl)pyrimidine-5-carbaldehyde **TMSPy-CHO**, 1.5 mM (1*R*)-2-methyl-1-(2-((trimethylsilyl)ethynyl)pyrimidin-5-yl)propan-1-ol **TMSPy-OH** (*ee* > 99.9%) and 40 mM *i*Pr<sub>2</sub>Zn; r.t.

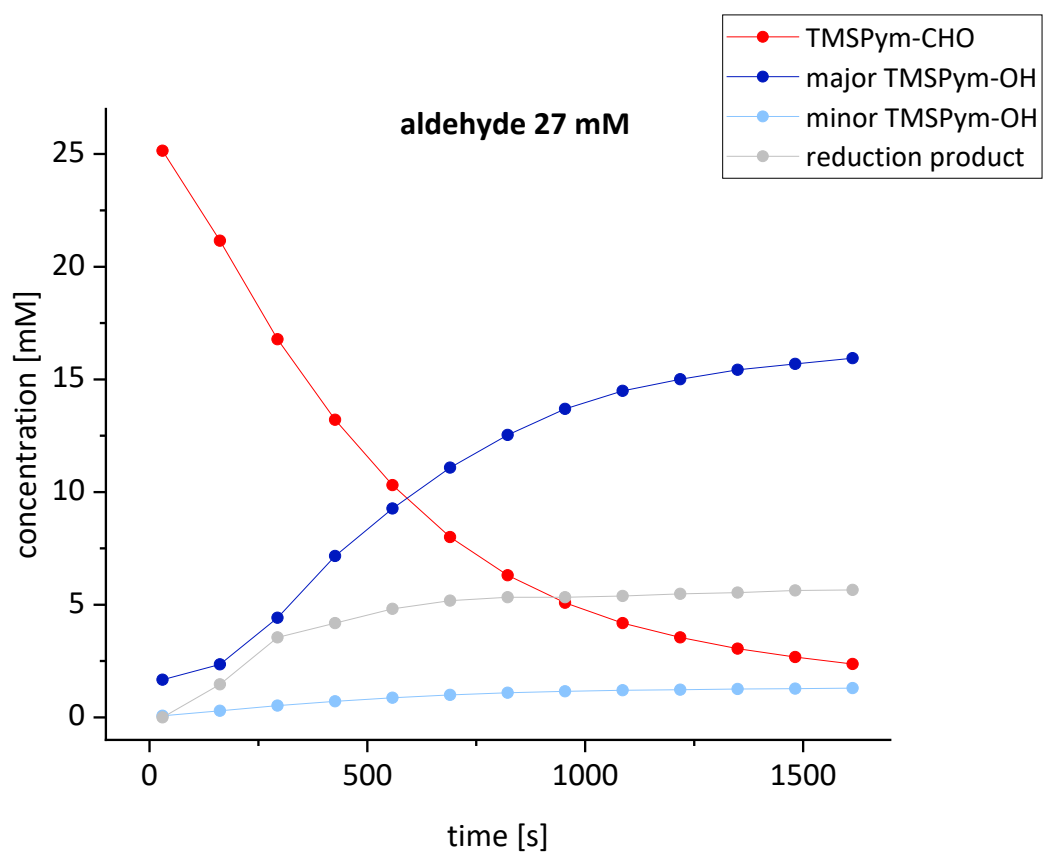

**Fig. 4.5.5:** Concentration-time profile of the *Soai* reaction in toluene (27 mM 2-((trimethylsilyl)ethynyl)pyrimidine-5-carbaldehyde **TMSPym-CHO**, 1.5 mM (1*R*)-2-methyl-1-(2-((trimethylsilyl)ethynyl)pyrimidin-5-yl)propan-1-ol **TMSPym-OH** (*ee* > 99.9%) and 40 mM *i*Pr<sub>2</sub>Zn; r.t.

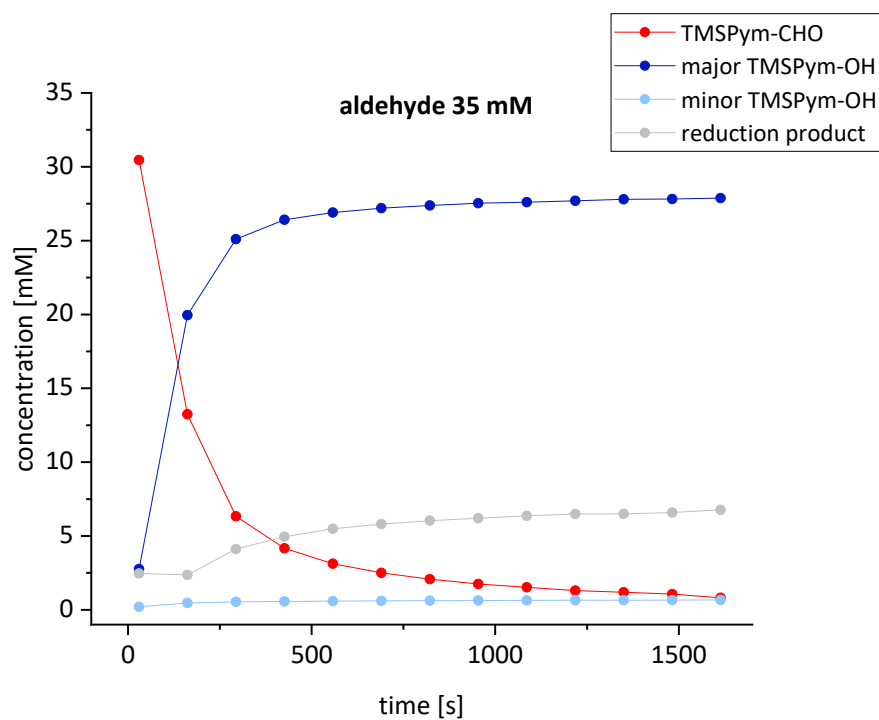

**Fig. 4.5.6:** Concentration-time profile of the *Soai* reaction in toluene (35 mM 2-((trimethylsilyl)ethynyl)pyrimidine-5-carbaldehyde **TMSPym-CHO**, 1.5 mM (1*R*)-2-methyl-1-(2-((trimethylsilyl)ethynyl)pyrimidin-5-yl)propan-1-ol **TMSPym-OH** (*ee* > 99.9%) and 40 mM *i*Pr<sub>2</sub>Zn; r.t.

#### 4.5.3 Variation of the TMSPym-OH concentration

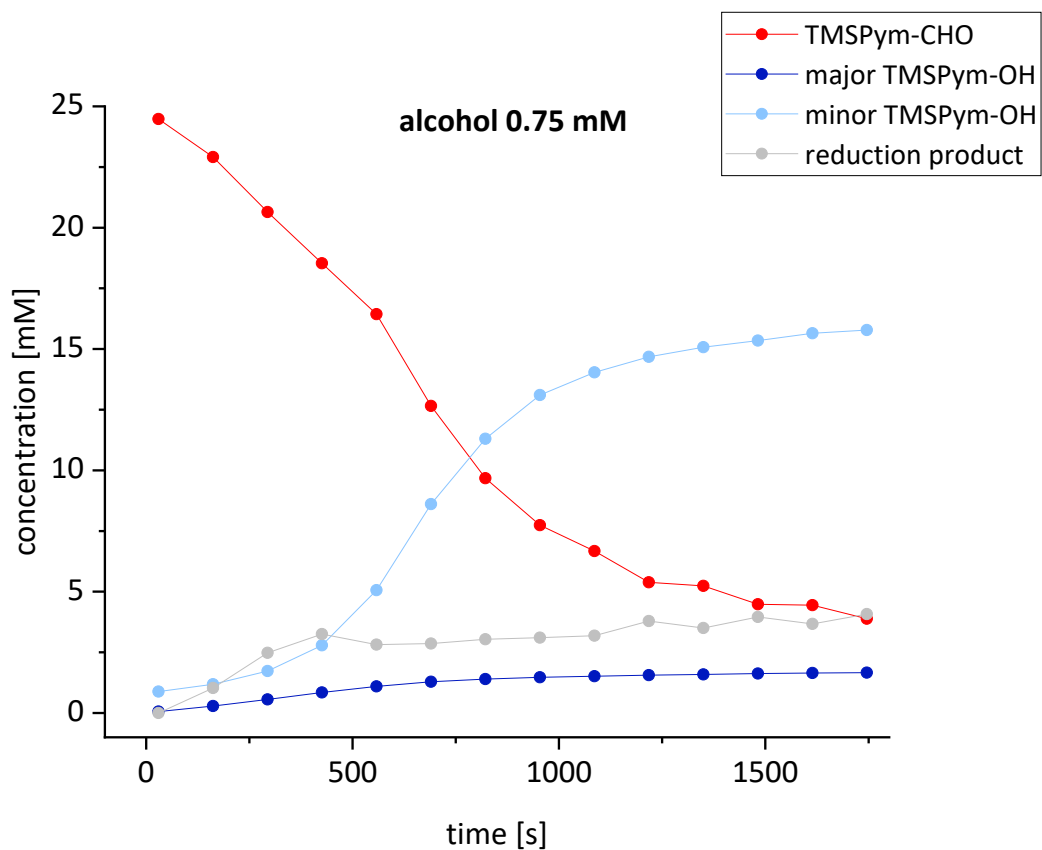

**Fig. 4.5.7:** Concentration-time profile of the *Soai* reaction in toluene (25 mM 2-((trimethylsilyl)ethynyl)pyrimidine-5-carbaldehyde **TMSPym-CHO**, 0.75 mM (1*R*)-2-methyl-1-(2-((trimethylsilyl)ethynyl)pyrimidin-5-yl)propan-1-ol **TMSPym-OH** (*ee* > 99.9%) and 40 mM *i*Pr<sub>2</sub>Zn; r.t.

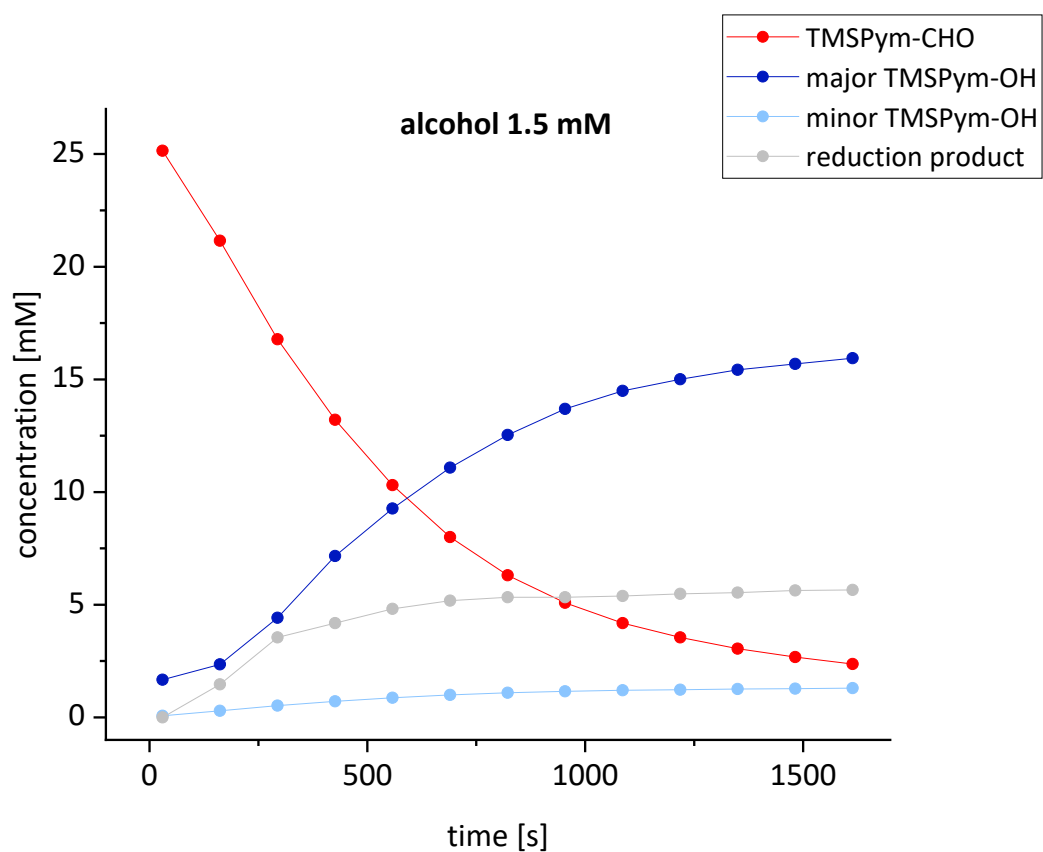

**Fig. 4.5.8:** Concentration-time profile of the *Soai* reaction in toluene (25 mM 2-((trimethylsilyl)ethynyl)pyrimidine-5-carbaldehyde **TMSPym-CHO**, 1.5 mM (1*R*)-2-methyl-1-(2-((trimethylsilyl)ethynyl)pyrimidin-5-yl)propan-1-ol **TMSPym-OH** (*ee* > 99.9%) and 40 mM *i*Pr<sub>2</sub>Zn; r.t.

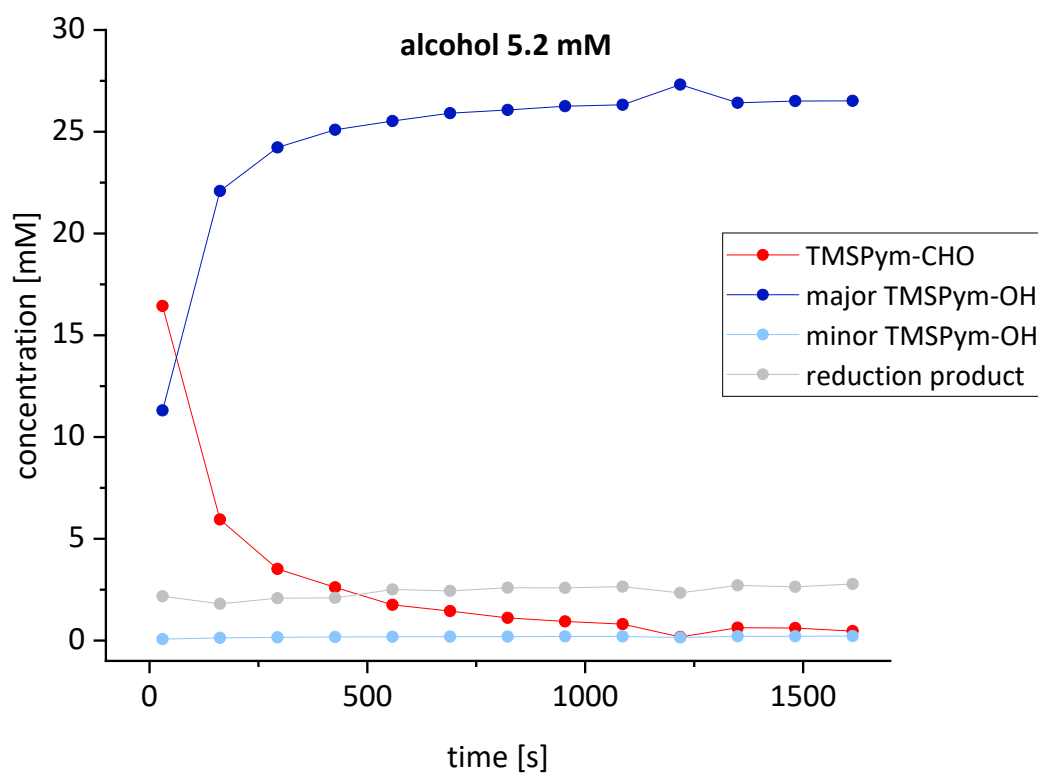

**Fig. 4.5.9:** Concentration-time profile of the *Soai* reaction in toluene (25 mM 2-((trimethylsilyl)ethynyl)pyrimidine-5-carbaldehyde **TMSPym-CHO**, 5.2 mM (1*R*)-2-methyl-1-(2-((trimethylsilyl)ethynyl)pyrimidin-5-yl)propan-1-ol **TMSPym-OH** (*ee* > 99.9%) and 40 mM *i*Pr<sub>2</sub>Zn; r.t.



#### 4.5.4 Determination of the Reaction Orders

##### a. Reaction Order for aldehyde TMSPyr-CHO

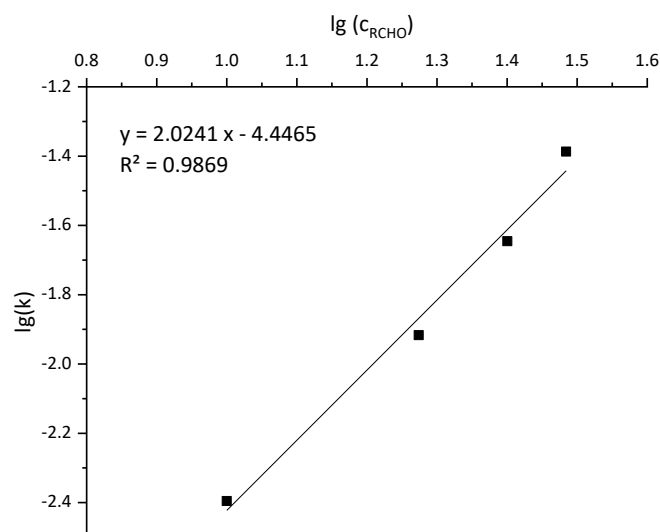

**Fig. 4.5.10:** Determination of the reaction order of **TMSPym-OH** by linear regression analysis of  $\lg(k_0)$  vs.  $\lg(c_{\text{aldehyde}})$ .

##### b. Reaction Order for alcohol TMSPyr-OH

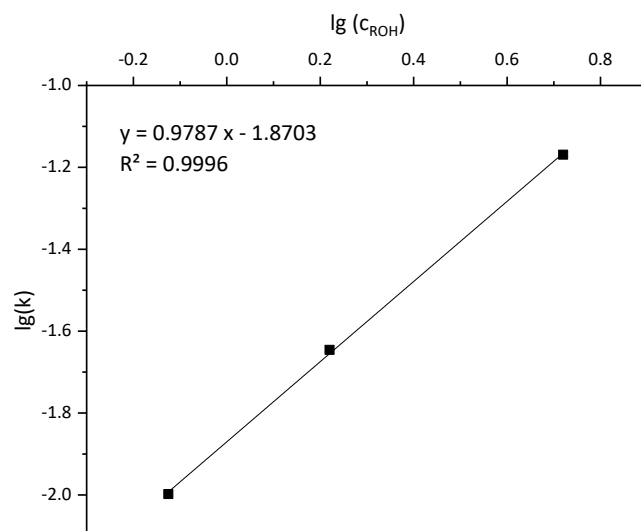

**Fig. 4.5.11:** Determination of the reaction order of **TMSPym-OH** by linear regression analysis of  $\lg(k_0)$  vs.  $\lg(c_{\text{alcohol}})$ .

## 5 Dynamic HPLC measurements of hemiacetal formation

### 5.1 Enantioselective dynamic HPLC measurements

Dynamic HPLC (DHPLC) measurements were performed on an *Agilent* 1200 Infinity HPLC equipped with a binary pump, an autosampler (*Agilent* HiP+), a thermostated column oven and a photodiode array detector (DAD). All operations were controlled by the *Agilent Chemstation* software. The separations were performed on an immobilized stationary phase using *n*-hexane/*i*PrOH = 60/40 as mobile phase at a flow rate of 1.0 mL/min.

The on-column equilibrium between the aldehyde and the hemiacetal of the pyridine system **TMSPyr**, was monitored on a Chiralpak® IC column (250 mm, i.D. 4.6 mm, particle size: 5 µm) from *Chiral Technologies*. The equilibrium was monitored between 10 °C and 70 °C.

The on-column equilibrium between the aldehyde and the hemiacetal of the pyridine system **AdPyr**, was monitored on a Chiralpak® IA column (250 mm, i.D. 4.6 mm, particle size: 5 µm) from *Chiral Technologies*. The equilibrium was monitored between 10 °C and 70 °C.

The on-column equilibrium between the aldehyde and the hemiacetal of the pyridine system **TMSPym**, was monitored on a Chiralpak® IB column (250 mm, i.D. 4.6 mm, particle size: 5 µm) from *Chiral Technologies*. The equilibrium was monitored between 10 °C and 60 °C.

The on-column equilibrium between the aldehyde and the hemiacetal of the pyridine system **AdPym**, was monitored on a Chiralpak® IB column (250 mm, i.D. 4.6 mm, particle size: 5 µm) from *Chiral Technologies*. The equilibrium was monitored between 10 °C and 60 °C.

### 5.2 Evaluation of the dynamic HPLC profiles

The evaluation of chromatographic profiles obtained from the DHPLC measurements was conducted according to a previously described method.<sup>[7]</sup> The rate constants *k* of hemiacetal formation were determined by analysis of the chromatographic peak profiles using the unified equation of dynamic chromatography implemented in the software *DCXplorer*.<sup>[8, 9]</sup>

### 5.3 DHPLC measurements of Soai aldehyde TMSPyr-CHO

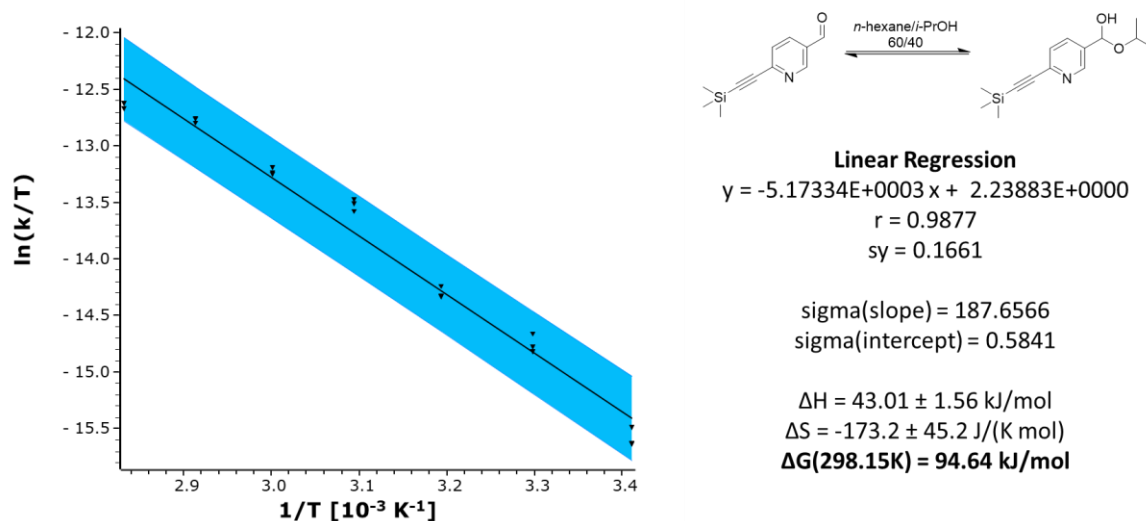

**Fig 5.3.1:** Eyring plot for the determination of the activation parameters  $\Delta H$ ,  $\Delta S$  and  $\Delta G$  of the hemiacetal formation with isopropanol obtained from the DHPLC experiment with the *Soai* aldehyde **TMSPyr-CHO**. The upper and lower curves represent the error bands of the linear regression with a level of confidence of 95%.

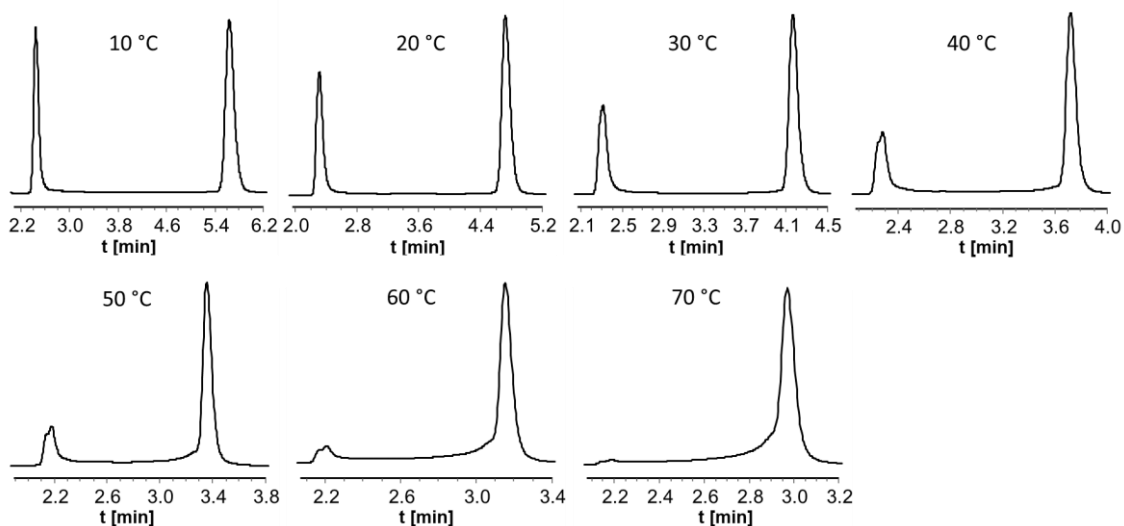

**Fig. 5.3.2:** Chromatographic profiles obtained from temperature dependent DHPLC measurements of the pyridine based aldehyde **TMSPyr-CHO**.

## 5.4 DHPLC measurements of *Soai* aldehyde TMSPym-CHO

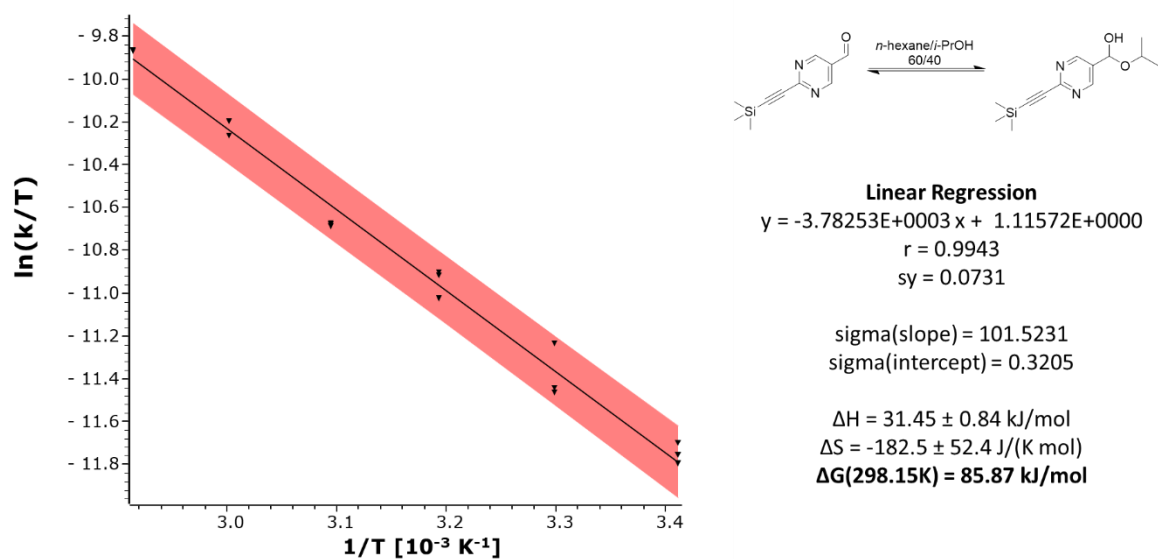

**Fig. 5.4.1:** Eyring plot for the determination of the activation parameters  $\Delta H$ ,  $\Delta S$  and  $\Delta G$  of the hemiacetal formation with isopropanol obtained from the DHPLC experiment with the *Soai* aldehyde **TMSPym-CHO**. The upper and lower curves represent the error bands of the linear regression with a level of confidence of 95%.

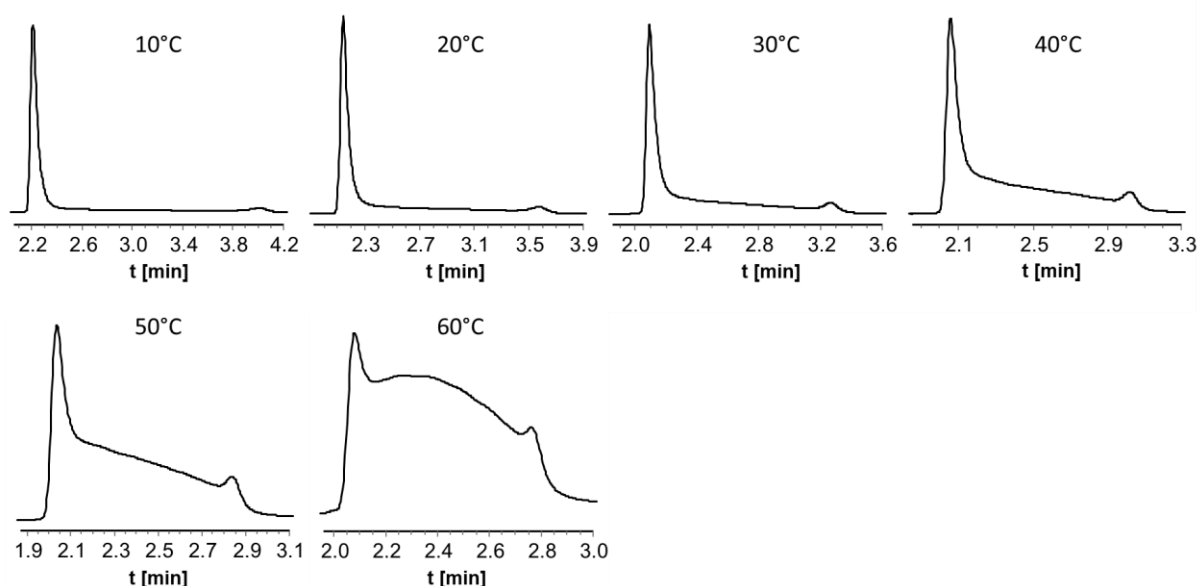

**Fig. 5.4.2.:** Chromatographic profiles obtained from temperature dependent DHPLC measurements of the pyridine based aldehyde **TMSPym-CHO**.

## 5.5 DHPLC measurements of *Soai* aldehyde AdPyr-CHO

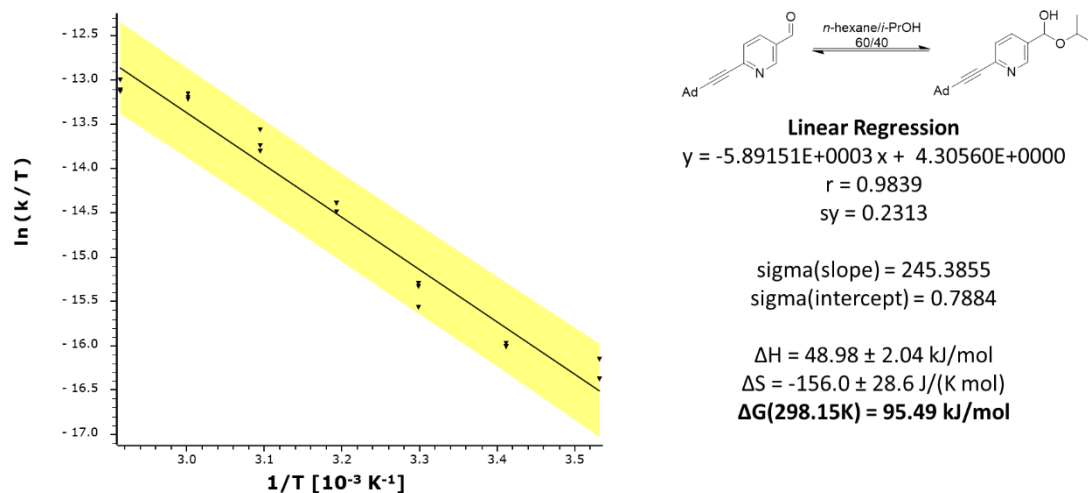

**Fig. 5.5.1:** Eyring plot for the determination of the activation parameters  $\Delta H$ ,  $\Delta S$  and  $\Delta G$  of the hemiacetal formation with isopropanol obtained from the DHPLC experiment with the *Soai* aldehyde **AdPyr-CHO**. The upper and lower curves represent the error bands of the linear regression with a level of confidence of 95%.

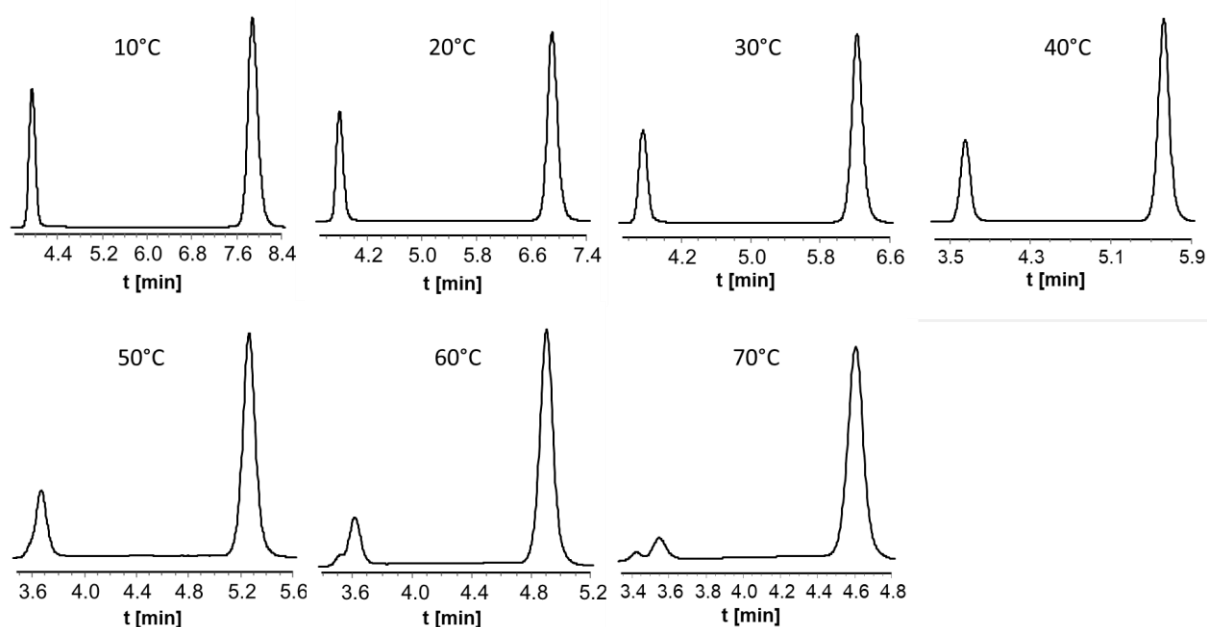

**Fig. 5.5.2:** Chromatographic profiles obtained from temperature dependent DHPLC measurements of the pyridine based aldehyde **TMSPyr-CHO**.

## 5.6 DHPLC measurements of *Soai* aldehyde AdPym-CHO

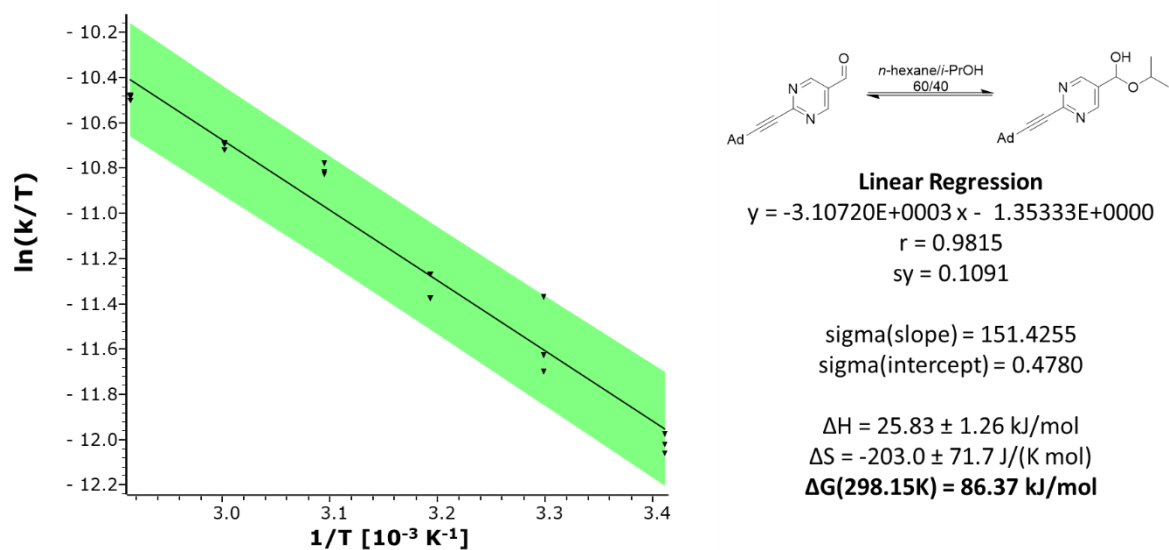

**Fig. 5.6.1:** Eyring plot for the determination of the activation parameters  $\Delta H$ ,  $\Delta S$  and  $\Delta G$  of the hemiacetal formation with isopropanol obtained from the DHPLC experiment with the *Soai* aldehyde **AdPym-CHO**. The upper and lower curves represent the error bands of the linear regression with a level of confidence of 95%.

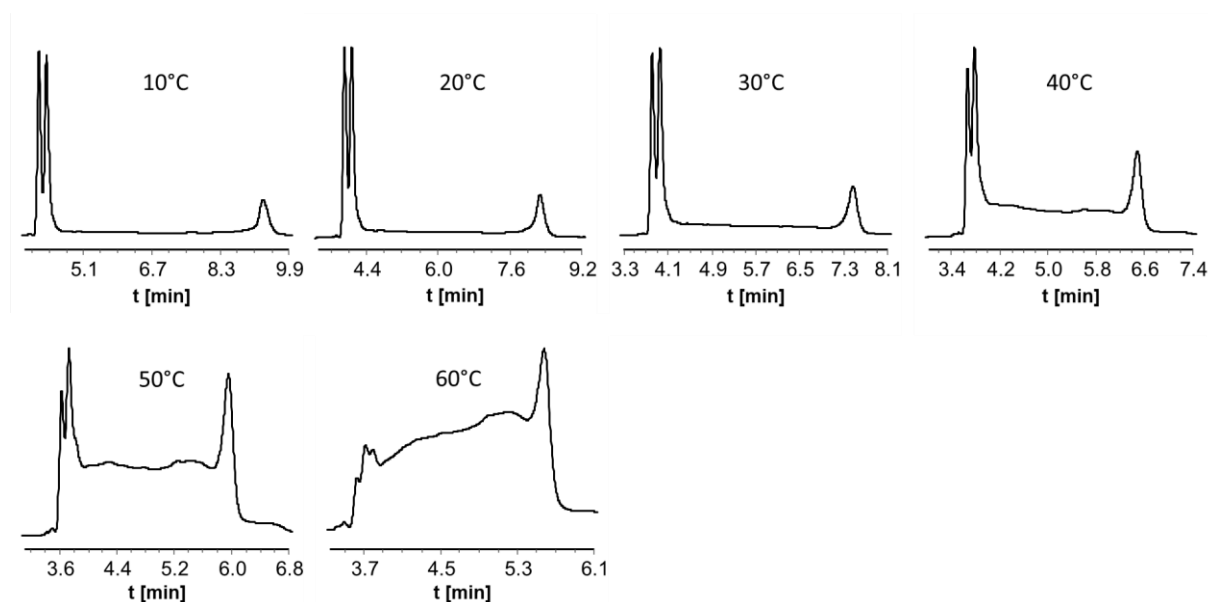

**Fig. 5.6.2:** Chromatographic profiles obtained from temperature dependent DHPLC measurements of the pyridine based aldehyde **TMSPyr-CHO**.

## 6 Kinetic Analysis and Simulation of Reaction Profiles

### 6.1 Reaction Rates of the Side Reaction

To precisely determine the reaction kinetics of the Soai reaction, it is first necessary to determine the reaction kinetics of the observed side reaction, in this case the reduction of the aldehyde to the achiral benzylic alcohol. Depending on the substrate, this side reaction has a considerable influence on the temporal concentration change of the aldehyde and thus also on the reaction order, as explained in this publication. We have first carried out an evaluation of the side reaction and the resulting reaction using their net reaction equations. It is known from the literature that the reaction order with regard to the aldehyde is between 1.6 and 1.9, without taking the side reaction into account. It must again be expressly pointed out that this side reaction does not occur to any great extent with all substrates, but only with those that lead to a relatively slow reaction.

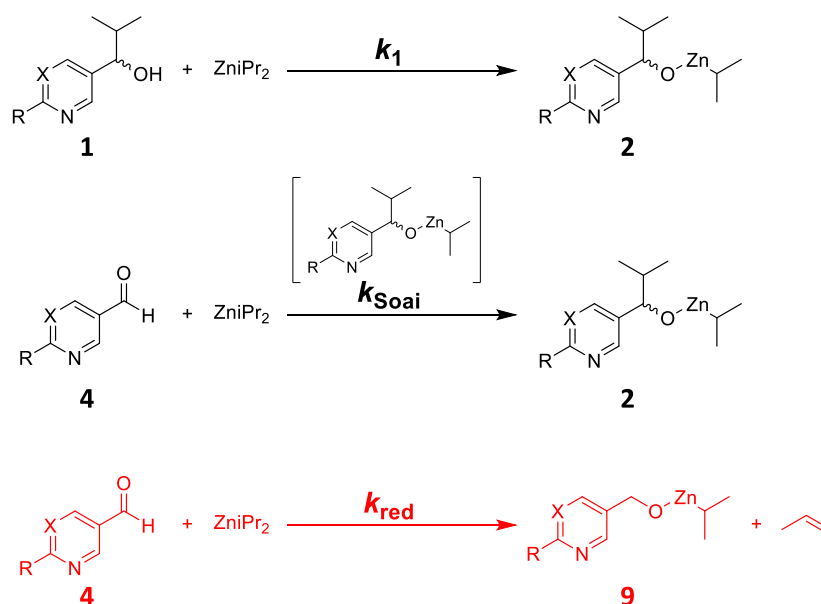

**Fig. 6.1.1:** Net reaction equations of the Soai reaction and the side reaction, here the reduction of the aldehyde to the corresponding alcohol (red). Pyridyl ( $\text{X}=\text{CH}$ ) and pyrimidyl ( $\text{X}=\text{N}$ ) derivatives.

The exact analysis of the reaction orders, as described above, has shown that these result in 2 for the aldehyde and 1 for the alcohol for the Soai reaction.

This can also be determined by a model-free kinetic analysis with a variable reaction order in the aldehyde as follows.

$$\frac{d[1]}{dt} = -k_1[1][\text{ZnR}_2] \quad (\text{Eq. 5.1.1})$$

$$\frac{d[2]}{dt} = k_1[1][\text{ZnR}_2] + k_{\text{Soai}}[4]^x[2] \quad (\text{Eq. 5.1.2})$$

$$\frac{d[4]}{dt} = -k_{\text{Soai}}[4]^x[2] - k_{\text{red}}[4][\text{Zn}] \quad (\text{Eq. 5.1.3})$$

$$\frac{d[9]}{dt} = k_{\text{red}}[4][\text{Zn}] \quad (\text{Eq. 5.1.4})$$

$$\frac{d[\text{ZnR}_2]}{dt} = -k_{\text{Soai}}[4]^x[2] - k_{\text{red}}[4][\text{Zn}] - k_1[1][\text{ZnR}_2] \quad (\text{Eq. 5.1.5})$$

This system of ordinary differential equations considers the formation of the alcoholate from the alcohol additive in the first step. In this system the selectivity is neglected, because experimentally only enantiomerically pure/ highly enriched alcohols were used.

Reaction rate  $k_1$  is fixed to  $1.5 \cdot 10^2 \pm 7 \text{ M}^{-1}\text{s}^{-1}$  for a very rapid process. The equation for the alcoholate formation could be neglected, however for the mass balance of the reaction it should be included.

Reaction rates  $k_{\text{Soai}}$  and  $k_{\text{red}}$  and the reaction order  $x$  were varied in the following ranges (Table 6.1.1) with the given number of steps (logarithmic scaling for the reaction rates).

**Table 6.1.1:** Parameter ranges for variables to determine the reaction kinetics and the reaction order.  $\text{M} = \text{mol} \cdot \text{L}^{-1}$ .

| Parameter         | Low                                           | High                                       | Number of steps |
|-------------------|-----------------------------------------------|--------------------------------------------|-----------------|
| $k_1$             | 150                                           |                                            | 1               |
| $k_{\text{Soai}}$ | $1 \cdot 10^{-1} \text{ M}^{-2}\text{s}^{-1}$ | $1 \cdot 10^3 \text{ M}^{-2}\text{s}^{-1}$ | 500             |
| $k_{\text{red}}$  | $1 \cdot 10^{-5} \text{ M}^{-1}\text{s}^{-1}$ | $1 \text{ M}^{-1}\text{s}^{-1}$            | 500             |
| $x$               | 1.5                                           | 2.5                                        | 11              |

Kinetic reaction profiles were calculated with the given experimental starting parameters (concentrations) and the measured reaction time of one of the kinetic profiles. By this approach 2,750,000 reaction profiles are obtained and compared with the selected experimental profile. The parameter sets of the calculated profiles with a deviation less than  $3\sigma$  of the experimental profile were



selected. This process was then repeated with all other experimental profiles until the parameter range was applicable to all profiles with a deviation within  $3\sigma$ . The new parameter range was then split again into  $500 \times 500$  sub-steps. The reaction order of 2 for the aldehyde was already obtained after the first iteration for all reactions investigated.

$$\frac{d[1]}{dt} = -k_1[1][\text{ZnR}_2] \quad (\text{Eq. 5.1.6})$$

$$\frac{d[2]}{dt} = k_1[1][\text{ZnR}_2] + k_{\text{Soai}}[4]^2[2] \quad (\text{Eq. 5.1.7})$$

$$\frac{d[4]}{dt} = -k_{\text{Soai}}[4]^2[2] - k_{\text{red}}[4][\text{ZnR}_2] \quad (\text{Eq. 5.1.8})$$

$$\frac{d[9]}{dt} = k_{\text{red}}[4][\text{ZnR}_2] \quad (\text{Eq. 5.1.9})$$

$$\frac{d[\text{ZnR}_2]}{dt} = -k_{\text{Soai}}[4]^2[2] - k_{\text{red}}[4][\text{ZnR}_2] - k_1[1][\text{ZnR}_2] \quad (\text{Eq. 5.1.10})$$

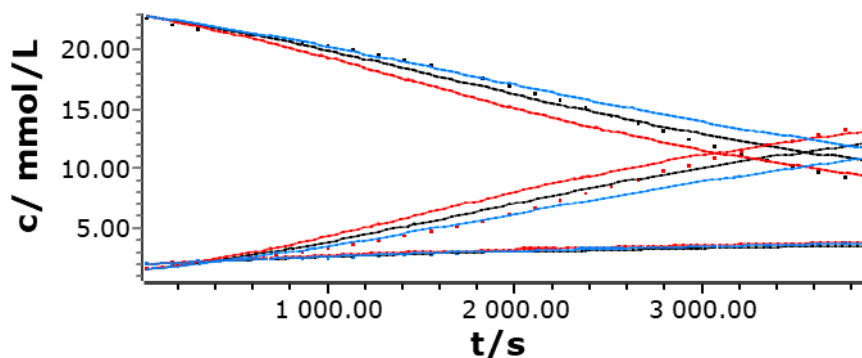

**Fig. 6.1.2:** Kinetic analysis of the Soai reaction (net reaction) and the side reaction for TMSPyr-CHO. First iteration to narrow down the parameter range for  $k_{\text{Soai}}$  and  $k_{\text{red}}$ , and determine the reaction order for the aldehyde.

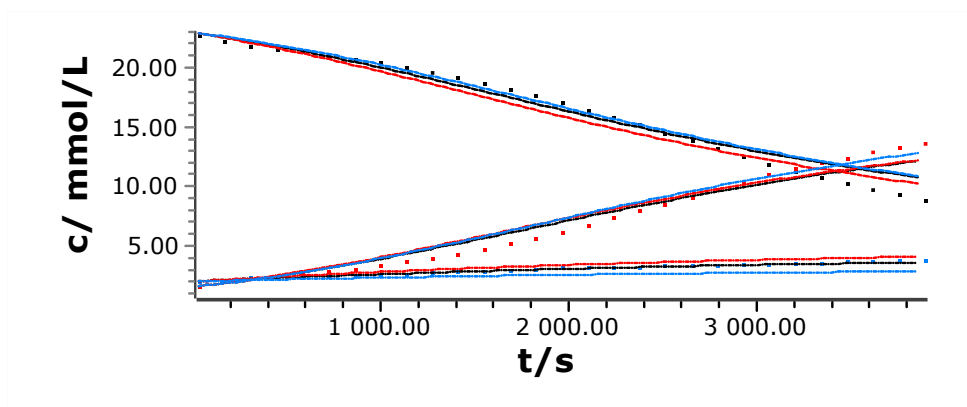

**Fig. 6.1.2:** Kinetic analysis of the Soai reaction (net reaction) and the side reaction for TMSPyr-CHO. Second iteration to refine the parameter range for  $k_{\text{Soai}}$  and  $k_{\text{red}}$ .

The reaction rates of the reducing side reaction  $k_{\text{red}}$  for all substrates obtained by this procedure are summarized in Table 6.1.2.

**Table 6.1.2:** Reaction rates  $k_{\text{red}}$  of the side reaction.

| Substrate                      | 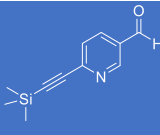 |  |  |  |
|--------------------------------|-------------------------------------------------------------------------------------|-------------------------------------------------------------------------------------|--------------------------------------------------------------------------------------|---------------------------------------------------------------------------------------|
| Reaction rate $k_{\text{red}}$ | $1.21 \cdot 10^{-3} \text{ M}^{-2} \text{ s}^{-1}$                                  | $1.93 \cdot 10^{-3} \text{ M}^{-2} \text{ s}^{-1}$                                  | $9.60 \cdot 10^{-3} \text{ M}^{-2} \text{ s}^{-1}$                                   | $1.88 \cdot 10^{-2} \text{ M}^{-2} \text{ s}^{-1}$                                    |

## 6.2 Mechanistic Model and Algorithm for the Kinetic Analysis of the Soai Reaction

Based on the experimentally identified intermediates and reaction traces obtained in situ high-resolution mass spectrometric (HRMS) reaction profiling the following mechanism is proposed.

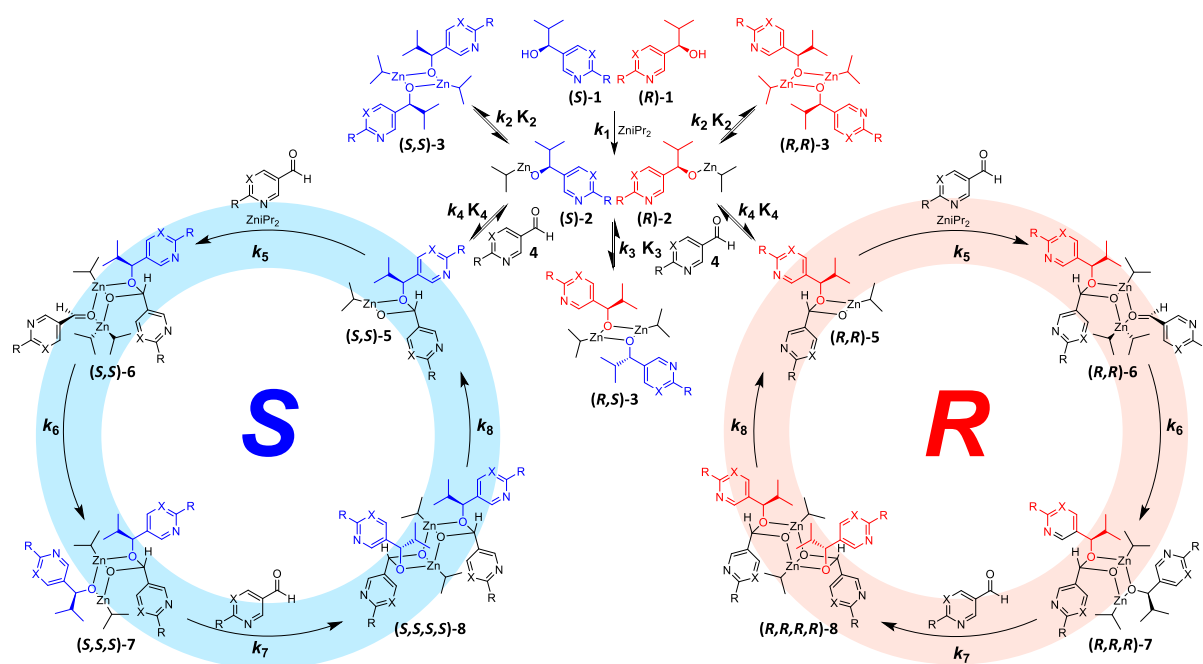

**Fig. 6.2.1:** Proposed reaction mechanism of the Soai reaction considering the *R*- and *S*-pathway of autocatalysis. Pyridyl (X=CH) and pyrimidyl (X=N) derivatives.

Based on this proposed mechanism the following system of ordinary differential equations (ODEs) was derived to describe the reaction kinetics of the Soai reaction. In addition, the side reaction (reduction) of the aldehyde is considered as an additional ODE and has been added to the corresponding differential equations for the conversion of the aldehyde and diisopropyl zinc. This system is numerically solved by a self-adaptive 4<sup>th</sup> order Runge-Kutta algorithm<sup>[10]</sup> programmed in Object Pascal (compiler Embarcadero Delphi XE 7). The program Soai 7 plus (plus: addition of the side reaction) has a graphical user interface to input single data sets, to graphically plot calculation results and an interface for the calculation of large data sets with definable ranges and steps of the reaction rate constants  $k_n$  and equilibrium constants  $K_n$ . Typically, datasets of 1,953,125 reaction profiles for given experimental parameters were generated and compared with the selected experimental profiles of (*R*)-1, (*S*)-1 and 4 to refine the kinetic parameters and thus the rate constants for the respective partial steps were determined. The parameter sets of the calculated profiles with a deviation less than  $3\sigma$  of the experimental profile were selected and the experimental parameters adjusted to the next experimental conditions. This process was then repeated with all other experimental profiles until the parameter range was applicable to all profiles with a deviation within  $3\sigma$ . For the refinement of the kinetic parameters, this process was repeated 3 times (sets A,

B, C, and D). In total around 20,000,000 reaction profiles were calculated for each experimental dataset. The remaining reaction profiles with a deviation within  $3\sigma$  were statistically evaluated to obtain the mean value and the standard deviation of the reaction rates and equilibrium constants.

In the following the ODEs describing the Soai reaction network are summarized.

Differential equations to describe the time-dependent change of the concentration of the alcohol **1**:

$$\frac{d[(R)-1]}{dt} = -k_1[(R) - 1][ZnR_2] \quad (\text{Eq. 5.2.1})$$

$$\frac{d[(S)-1]}{dt} = -k_1[(S) - 1][ZnR_2] \quad (\text{Eq. 5.2.2})$$

Differential equation to describe the time-dependent change of the concentration of the dialkyl zinc reagent:

$$\begin{aligned} \frac{d[ZnR_2]}{dt} = & -k_1[(R) - 1][ZnR_2] - k_1[(S) - 1][ZnR_2] - k_5[(R, R) - 5][ZnR_2][4] - \\ & k_5[(S, S) - 5][ZnR_2][4] - k_{red}[4][ZnR_2] \end{aligned} \quad (\text{Eq. 5.2.3})$$

Differential equations to describe the time-dependent change of the concentration of the zinc alcoholates **2**:

$$\begin{aligned} \frac{d[(R)-2]}{dt} = & k_1[(R) - 1][ZnR_2] - 2k_2[(R) - 2]^2 + 2k_{-2}[(R, R) - 3] - k_3[(R) - 2][(S) - 2] + \\ & k_{-3}[(R, S) - 3] - k_4[4][(R) - 2] + k_{-4}[(R, R) - 5] \end{aligned} \quad (\text{Eq. 5.2.4})$$

$$\begin{aligned} \frac{d[(S)-2]}{dt} = & k_1[(S) - 1][ZnR_2] - 2k_2[(S) - 2]^2 + 2k_{-2}[(S, S) - 3] - k_3[(R) - 2][(S) - 2] + \\ & k_{-3}[(R, S) - 3] - k_4[4][(S) - 2] + k_{-4}[(S, S) - 5] \end{aligned} \quad (\text{Eq. 5.2.5})$$

Differential equations to describe the time-dependent change of the concentration of the homochiral and heterochiral dimeric zinc alcoholates **3**. The heterochiral dimeric zinc alcoholate can be dissolved (diss) or precipitated (solid):

$$\frac{d[(R,R)-3]}{dt} = k_2[(R) - 2]^2 - k_{-2}[(R, R) - 3] \quad (\text{Eq. 5.2.6})$$

$$\frac{d[(S,S)-3]}{dt} = k_2[(S) - 2]^2 - k_{-2}[(S,S) - 3] \quad (\text{Eq. 5.2.7})$$

$$\frac{d[(R,S)-3_{diss}]}{dt} = k_3[(R) - 2][(S) - 2] - k_{-3}[(R,S) - 3_{diss}] - k_d[(R,S) - 3_{diss}] + k_{-d}[(R,S) - 3_{solid}] \quad (\text{Eq. 5.2.8})$$

$$\frac{d[(R,S)-3_{solid}]}{dt} = k_d[(R,S) - 3_{diss}] - k_{-d}[(R,S) - 3_{solid}] \quad (\text{Eq. 5.2.9})$$

Differential equation to describe the time-dependent change of the concentration of the aldehyde **4**:

$$\frac{d[4]}{dt} = -k_4[(R) - 2][4] + k_{-4}[(R,R) - 5] - k_4[(S) - 2][4] + k_{-4}[(S,S) - 5] - k_5[(R,R) - 5][4][ZnR_2] - k_5[(S,S) - 5][4][ZnR_2] - k_7[(R,R,R) - 7][4] - k_7[(S,S,S) - 7][4] \quad (\text{Eq. 5.2.10})$$

Differential equation to describe the time-dependent change of the concentration of the hemiacetals **5**:

$$\frac{d[(R,R)-5]}{dt} = k_4[(R) - 2][4] - k_{-4}[(R,R) - 5] - k_5[(R,R) - 5][4][ZnR_2] + 2k_8[(R,R,R,R) - 8] \quad (\text{Eq. 5.2.11})$$

$$\frac{d[(S,S)-5]}{dt} = k_4[(S) - 2][4] - k_{-4}[(S,S) - 5] - k_5[(S,S) - 5][4][ZnR_2] + 2k_8[(S,S,S,S) - 8] \quad (\text{Eq. 5.2.12})$$

Differential equation to describe the time-dependent change of the concentration of the addition of aldehyde and dialkyl zinc to the hemiacetals **5**, forming enantiomers **6**:

$$\frac{d[(R,R)-6]}{dt} = k_5[(R,R) - 5][4][ZnR_2] - k_6[(R,R) - 6] \quad (\text{Eq. 5.2.13})$$

$$\frac{d[(S,S)-6]}{dt} = k_5[(S,S) - 5][4][ZnR_2] - k_6[(S,S) - 6] \quad (\text{Eq. 5.2.14})$$

Differential equation to describe the time-dependent change of the insertion of the alkyl residue into the hemiacetal complex **6**, forming **7**:

$$\frac{d[(R,R,R)-7]}{dt} = k_6[(R,R) - 6] - k_7[(R,R,R) - 7][4] \quad (\text{Eq. 5.2.15})$$

$$\frac{d[(S,S,S)-7]}{dt} = k_6[(S,S) - 6] - k_7[(S,S,S) - 7][4] \quad (\text{Eq. 5.2.16})$$

Differential equation to describe the time-dependent formation of dimeric hemiacetal **8**:

$$\frac{d[(R,R,R,R)-8]}{dt} = k_7[(R,R,R) - 7][4] - k_8[(R,R,R,R) - 8] \quad (\text{Eq. 5.2.17})$$

$$\frac{d[(S,S,S,S)-8]}{dt} = k_7[(S,S,S) - 7][4] - k_8[(S,S,S,S) - 8] \quad (\text{Eq. 5.2.18})$$

Differential equation to describe the time-dependent formation of reduction side product **9**:

$$\frac{d[9]}{dt} = k_{\text{red}}[4][ZnR_2] \quad (\text{Eq. 5.2.19})$$



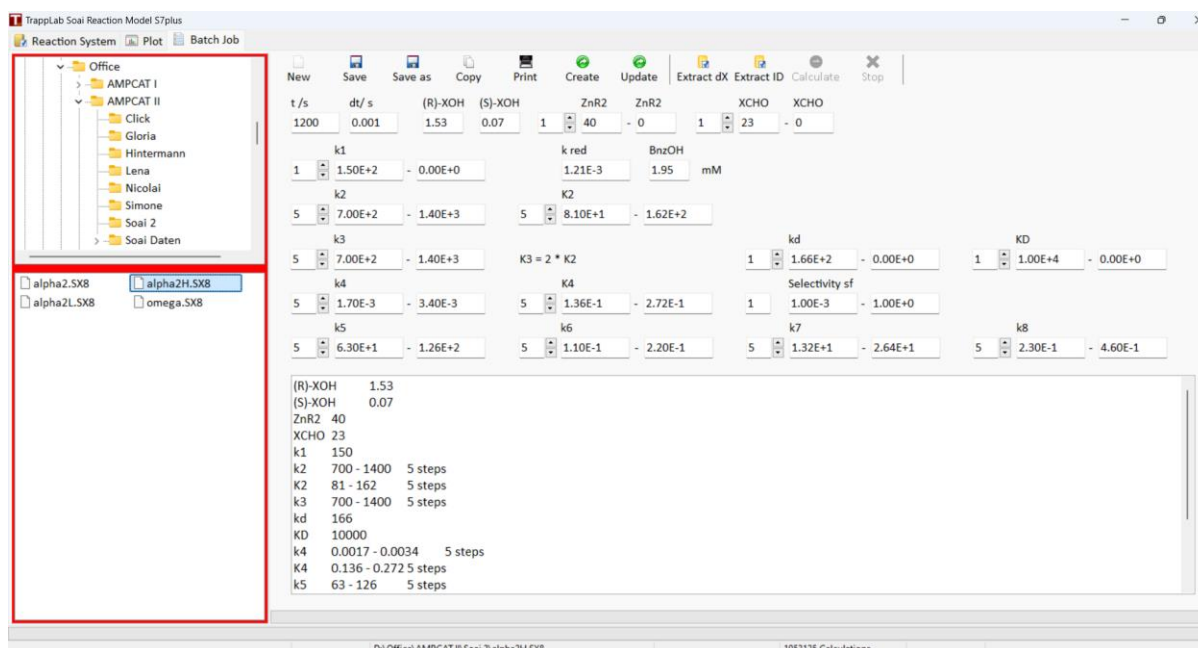

**Fig. 6.2.4:** User interface of the Soai 7 plus application to perform batch job calculations with systematic variation of reaction parameters.

Finally, a Microsoft Excel data sheet is generated based on this data. The calculation time for a data set of 1.9 mio. profiles is about 1 day on a HP Z4 G4 workstation (Xeon W5-2445, 96 GB RAM, 10 TB SSD).



### 6.3 Summary of the Reaction Rates Determined from the Experimental Data

**Table 6.3.1:** Summarized kinetic data for the four aldehydes (TMSPyr-CHO, Ad-Pyr-CHO, TMSPym-CHO, AdPym-CHO) in comparison with *tert*-butylacetylene-1-yl)pyrimidyl-5-carbaldehyde (TBuPym-CHO).

|   |           | 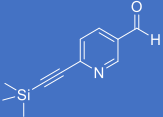 |  |  |  |  |
|---|-----------|-----------------------------------------------------------------------------------|-----------------------------------------------------------------------------------|-----------------------------------------------------------------------------------|------------------------------------------------------------------------------------|-------------------------------------------------------------------------------------|
| 1 | $k_1$     | $1.5 \cdot 10^2$<br>$\pm 9 \text{ M}^{-1}\text{s}^{-1}$                           | $1.5 \cdot 10^2$<br>$\pm 11 \text{ M}^{-1}\text{s}^{-1}$                          | $1.5 \cdot 10^2$<br>$\pm 6 \text{ M}^{-1}\text{s}^{-1}$                           | $1.5 \cdot 10^2$<br>$\pm 10 \text{ M}^{-1}\text{s}^{-1}$                           | $1.5 \cdot 10^2$<br>$\pm 7 \text{ M}^{-1}\text{s}^{-1}$                             |
| 2 | $k_2$     | $6.4 \cdot 10^1$<br>$\pm 11 \text{ M}^{-1}\text{s}^{-1}$                          | $4.9 \cdot 10^1$<br>$\pm 12 \text{ M}^{-1}\text{s}^{-1}$                          | $3.6 \cdot 10^2$<br>$\pm 6 \text{ M}^{-1}\text{s}^{-1}$                           | $2.5 \cdot 10^2$<br>$\pm 37 \text{ M}^{-1}\text{s}^{-1}$                           | $7.0 \cdot 10^2$<br>$\pm 32 \text{ M}^{-1}\text{s}^{-1}$                            |
|   | $k_{-2}$  | $2.8 \cdot 10^1$<br>$\pm 5 \text{ M}^{-1}\text{s}^{-1}$                           | $3.7 \cdot 10^1$<br>$\pm 1.7 \text{ s}^{-1}$                                      | 2.1<br>$\pm 0.1 \text{ s}^{-1}$                                                   | 1.2<br>$\pm 0.3 \text{ s}^{-1}$                                                    | 8.6<br>$\pm 0.8 \text{ s}^{-1}$                                                     |
|   | $K_2$     | 2.2<br>$\pm 0.03 \text{ M}^{-1}$                                                  | 1.35<br>$\pm 0.16 \text{ M}^{-1}$                                                 | 171<br>$\pm 2 \text{ M}^{-1}$                                                     | 208<br>$\pm 6 \text{ M}^{-1}$                                                      | 81<br>$\pm 4 \text{ M}^{-1}$                                                        |
| 3 | $k_3$     | $4.0 \cdot 10^2$<br>$\pm 8 \text{ M}^{-1}\text{s}^{-1}$                           | $2.6 \cdot 10^2$<br>$\pm 10 \text{ M}^{-1}\text{s}^{-1}$                          | $9.9 \cdot 10^2$<br>$\pm 64 \text{ M}^{-1}\text{s}^{-1}$                          | $5.8 \cdot 10^2$<br>$\pm 60 \text{ M}^{-1}\text{s}^{-1}$                           | $7.0 \cdot 10^2$<br>$\pm 32 \text{ M}^{-1}\text{s}^{-1}$                            |
|   | $k_{-3}$  | 90.9<br>$\pm 1.7 \text{ s}^{-1}$                                                  | 97.7<br>$\pm 0.5 \text{ s}^{-1}$                                                  | 2.9<br>$\pm 0.2 \text{ s}^{-1}$                                                   | 1.4<br>$\pm 0.1 \text{ s}^{-1}$                                                    | 4.3<br>$\pm 0.4 \text{ s}^{-1}$                                                     |
|   | $K_3$     | 4.4<br>$\pm 0.2 \text{ M}^{-1}$                                                   | 2.7<br>$\pm 0.3 \text{ M}^{-1}$                                                   | 342<br>$\pm 10 \text{ M}^{-1}$                                                    | 416<br>$\pm 21 \text{ M}^{-1}$                                                     | 162<br>$\pm 8 \text{ M}^{-1}$                                                       |
| 4 | $k_4$     | $3.1 \cdot 10^{-4}$<br>$\pm 0.2 \cdot 10^{-4} \text{ M}^{-1}\text{s}^{-1}$        | $3.5 \cdot 10^{-4}$<br>$\pm 0.5 \cdot 10^{-4} \text{ M}^{-1}\text{s}^{-1}$        | $2.5 \cdot 10^{-3}$<br>$\pm 3.2 \cdot 10^{-5} \text{ M}^{-1}\text{s}^{-1}$        | $1.4 \cdot 10^{-3}$<br>$\pm 5.9 \cdot 10^{-5} \text{ M}^{-1}\text{s}^{-1}$         | $1.7 \cdot 10^{-3}$<br>$\pm 1.2 \cdot 10^{-4} \text{ M}^{-1}\text{s}^{-1}$          |
|   | $k_{-4}$  | $4.4 \cdot 10^{-4}$<br>$\pm 0.3 \cdot 10^{-4} \text{ s}^{-1}$                     | $3.3 \cdot 10^{-4}$<br>$\pm 0.7 \cdot 10^{-4} \text{ s}^{-1}$                     | $2.6 \cdot 10^{-2}$<br>$\pm 3.5 \cdot 10^{-4} \text{ s}^{-1}$                     | $5.6 \cdot 10^{-3}$<br>$\pm 2.1 \cdot 10^{-4} \text{ s}^{-1}$                      | $1.3 \cdot 10^{-2}$<br>$\pm 1.0 \cdot 10^{-3} \text{ s}^{-1}$                       |
|   | $K_4$     | 0.704<br>$\pm 0.002 \text{ M}^{-1}$                                               | 1.055<br>$\pm 0.006 \text{ M}^{-1}$                                               | 0.094<br>$\pm 0.001 \text{ M}^{-1}$                                               | 0.258<br>$\pm 0.004 \text{ M}^{-1}$                                                | 0.136<br>$\pm 0.001 \text{ M}^{-1}$                                                 |
| 5 | $k_5$     | 5.1<br>$\pm 0.1 \text{ M}^{-2}\text{s}^{-1}$                                      | 4.2<br>$\pm 0.2 \text{ M}^{-2}\text{s}^{-1}$                                      | 90.9<br>$\pm 1.0 \text{ M}^{-2}\text{s}^{-1}$                                     | 150.9<br>$\pm 0.9 \text{ M}^{-2}\text{s}^{-1}$                                     | 63.0<br>$\pm 5.0 \text{ M}^{-2}\text{s}^{-1}$                                       |
| 6 | $k_6$     | 0.90<br>$\pm 0.02 \text{ s}^{-1}$                                                 | 0.22<br>$\pm 0.01 \text{ s}^{-1}$                                                 | 0.19<br>$\pm 0.02 \text{ s}^{-1}$                                                 | $6.0 \cdot 10^{-2}$<br>$\pm 0.6 \cdot 10^{-3} \text{ s}^{-1}$                      | 0.11<br>$\pm 0.01 \text{ s}^{-1}$                                                   |
| 7 | $k_7$     | 32.5<br>$\pm 1.3 \text{ M}^{-1}\text{s}^{-1}$                                     | 127.8<br>$\pm 14.6 \text{ M}^{-1}\text{s}^{-1}$                                   | 4.4<br>$\pm 0.1 \text{ M}^{-1}\text{s}^{-1}$                                      | 9.4<br>$\pm 0.1 \text{ M}^{-1}\text{s}^{-1}$                                       | 13.2<br>$\pm 0.2 \text{ M}^{-1}\text{s}^{-1}$                                       |
| 8 | $k_8$     | $6.3 \cdot 10^{-1}$<br>$\pm 0.1 \cdot 10^{-1} \text{ s}^{-1}$                     | $1.8 \cdot 10^{-1}$<br>$\pm 0.4 \cdot 10^{-1} \text{ s}^{-1}$                     | $1.6 \cdot 10^{-1}$<br>$\pm 0.3 \cdot 10^{-1} \text{ s}^{-1}$                     | $5.6 \cdot 10^{-2}$<br>$\pm 0.6 \cdot 10^{-2} \text{ s}^{-1}$                      | $2.3 \cdot 10^{-1}$<br>$\pm 0.2 \cdot 10^{-1} \text{ s}^{-1}$                       |
|   | $k_{red}$ | $1.21 \cdot 10^{-3} \text{ M}^{-1}\text{s}^{-1}$                                  | $1.93 \cdot 10^{-3} \text{ M}^{-1}\text{s}^{-1}$                                  | $9.60 \cdot 10^{-3} \text{ M}^{-1}\text{s}^{-1}$                                  | $1.88 \cdot 10^{-2} \text{ M}^{-1}\text{s}^{-1}$                                   |                                                                                     |

## 6.4 Simulation of concentration-time profiles

### 6.4.1 TMSPyr-CHO/TMSPyr-OH System

**Table 6.4.1:** Simulation Parameters for the TMSPyr-CHO/TMSPyr-OH System.

|    | TMSPyrCHO<br>[mmol/L] | (R)-TMSPyrOH<br>[mmol/L] | (S)-TMSPyrOH<br>[mmol/L] | ee [%] | er   | ZnPr <sub>2</sub><br>[mmol/L] | t [s] |
|----|-----------------------|--------------------------|--------------------------|--------|------|-------------------------------|-------|
| 1  | 15                    | 1.49925                  | 0.00075                  | 99.9   | 1999 | 40                            | 5000  |
| 2  | 20                    | 1.49925                  | 0.00075                  | 99.9   | 1999 | 40                            | 5000  |
| 3  | 25                    | 1.49925                  | 0.00075                  | 99.9   | 1999 | 40                            | 5000  |
| 4  | 30                    | 1.49925                  | 0.00075                  | 99.9   | 1999 | 40                            | 5000  |
| 5  | 35                    | 1.49925                  | 0.00075                  | 99.9   | 1999 | 40                            | 5000  |
| 6  | 25                    | 0.749625                 | 0.000375                 | 99.9   | 1999 | 40                            | 5000  |
| 7  | 25                    | 1.49925                  | 0.00075                  | 99.9   | 1999 | 40                            | 5000  |
| 8  | 25                    | 1.7991                   | 0.0009                   | 99.9   | 1999 | 40                            | 5000  |
| 9  | 25                    | 2.9985                   | 0.0015                   | 99.9   | 1999 | 40                            | 5000  |
| 10 | 25                    | 1.49925                  | 0.00075                  | 99.9   | 1999 | 25                            | 5000  |
| 11 | 25                    | 1.49925                  | 0.00075                  | 99.9   | 1999 | 50                            | 5000  |
| 12 | 25                    | 1.49925                  | 0.00075                  | 99.9   | 1999 | 75                            | 5000  |
| 13 | 25                    | 1.49925                  | 0.00075                  | 99.9   | 1999 | 100                           | 5000  |

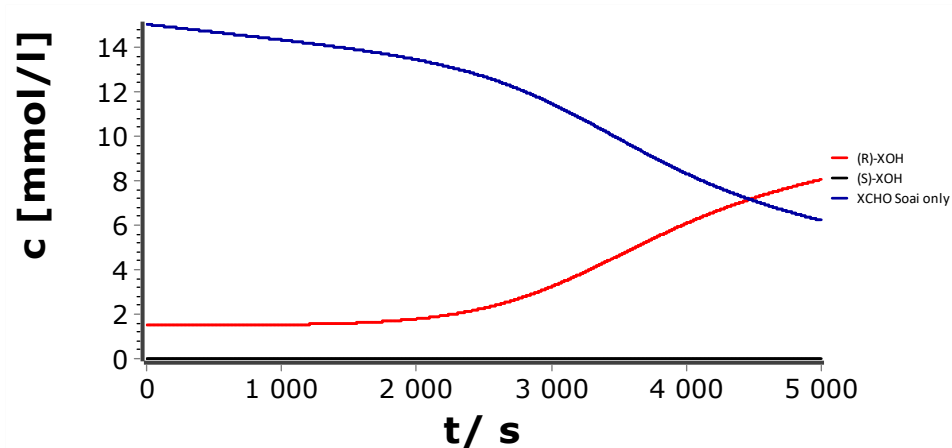

**Fig. 6.4.1:** Simulated concentration-time profile of the *Soai* reaction (15 mM 6-((Trimethylsilyl)ethynyl)nicotinaldehyde **TMSPyr-CHO**, 1.5 mM 2-Methyl-6-((trimethylsilyl)ethynyl)-pyridine-3-yl)propanol **TMSPyr-OH** ( $ee > 99.9\%$ ) and 40 mM  $iPr_2Zn$ ).

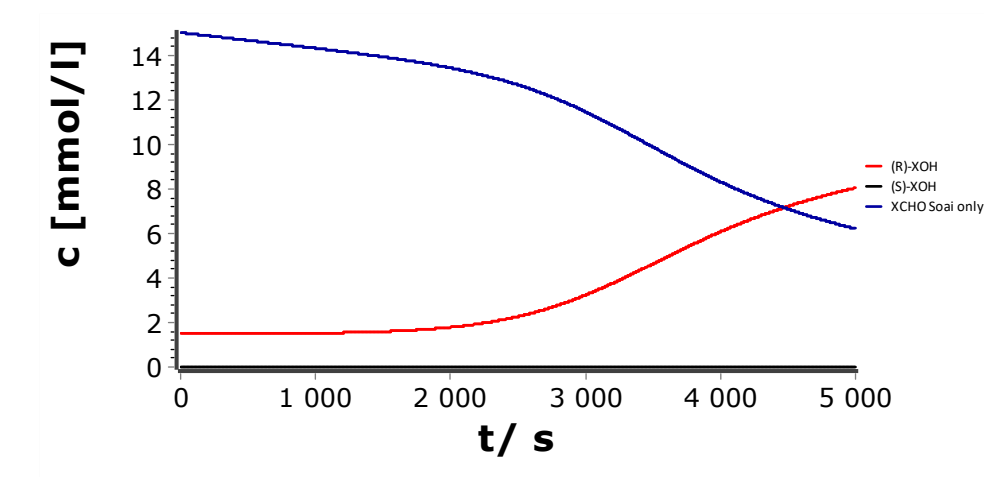

**Fig. 6.4.2:** Simulated concentration-time profile of the *Soai* reaction (20 mM 6-((Trimethylsilyl)ethynyl)nicotinaldehyde **TMSPyr-CHO**, 1.5 mM 2-Methyl-6-((trimethylsilyl)ethynyl)-pyridine-3-yl)propanol **TMSPyr-OH** ( $ee > 99.9\%$ ) and 40 mM  $iPr_2Zn$ ).

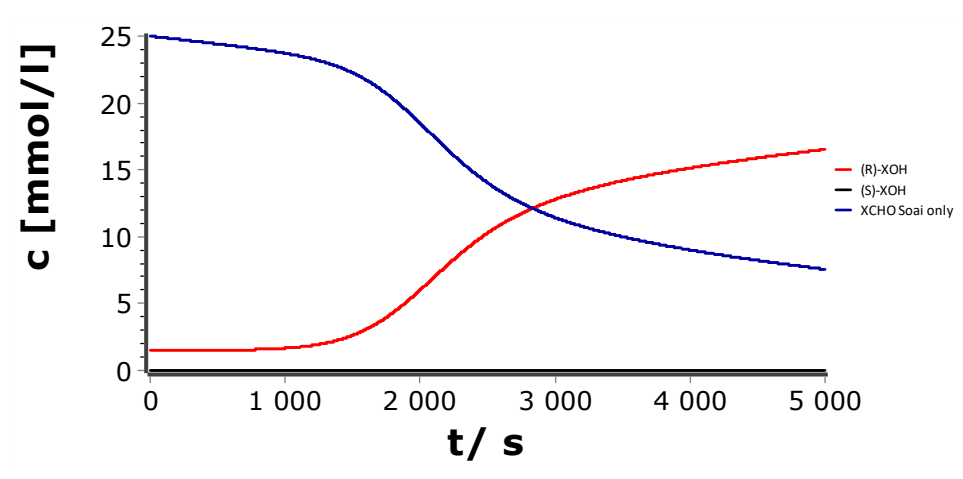

**Fig. 6.4.3:** Simulated concentration-time profile of the *Soai* reaction (25 mM 6-((Trimethylsilyl)ethynyl)nicotinaldehyde **TMSPyr-CHO**, 1.5 mM 2-Methyl-6-((trimethylsilyl)ethynyl)-pyridine-3-yl)propanol **TMSPyr-OH** ( $ee > 99.9\%$ ) and 40 mM  $iPr_2Zn$ ).

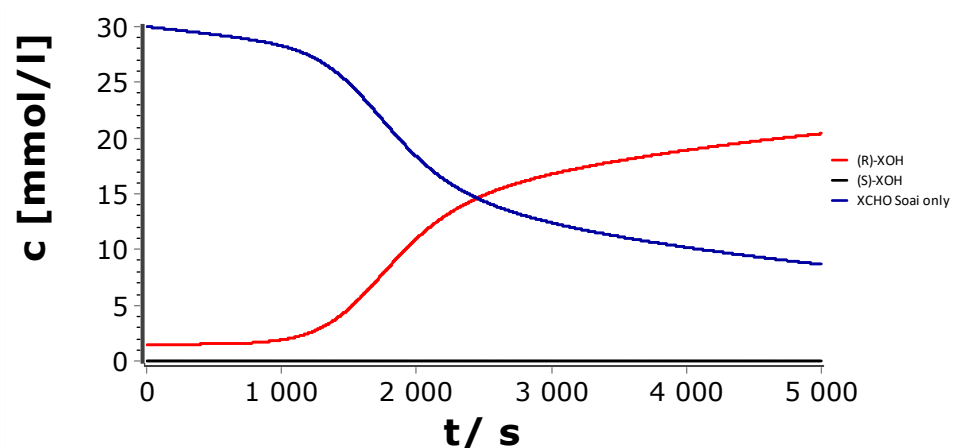

**Fig. 6.4.4:** Simulated concentration-time profile of the *Soai* reaction (30 mM 6-((Trimethylsilyl)ethynyl)nicotinaldehyde **TMSPyr-CHO**, 1.5 mM 2-Methyl-(6-((trimethylsilyl)ethynyl)-pyridine-3-yl)propanol **TMSPyr-OH** ( $ee > 99.9\%$ ) and 40 mM  $i\text{Pr}_2\text{Zn}$ ).

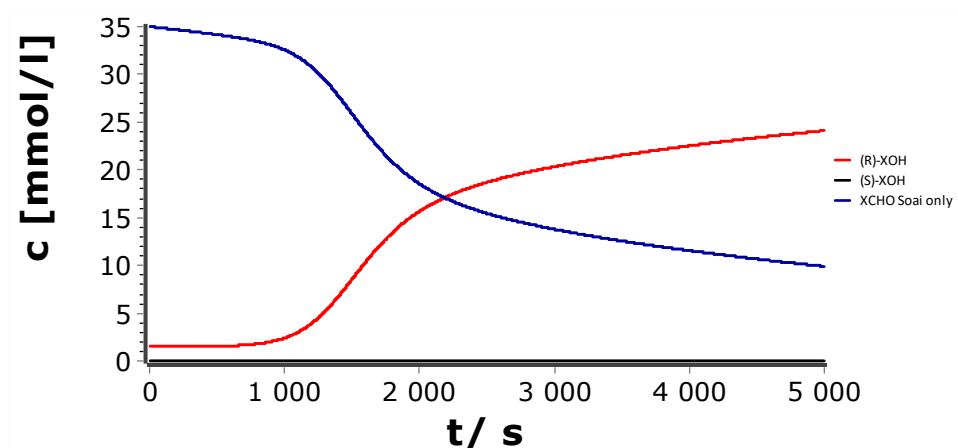

**Fig. 6.4.5:** Simulated concentration-time profile of the *Soai* reaction (35 mM 6-((Trimethylsilyl)ethynyl)nicotinaldehyde **TMSPyr-CHO**, 1.5 mM 2-Methyl-(6-((trimethylsilyl)ethynyl)-pyridine-3-yl)propanol **TMSPyr-OH** ( $ee > 99.9\%$ ) and 40 mM  $i\text{Pr}_2\text{Zn}$ ).

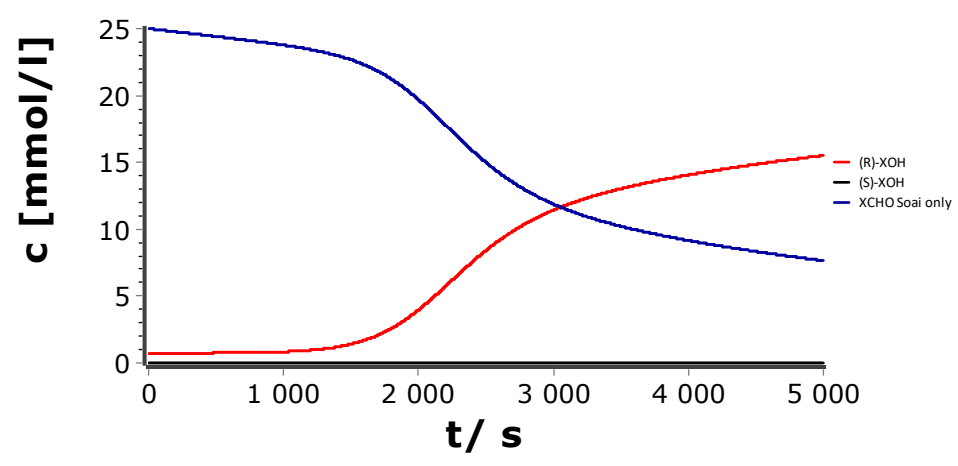

**Fig. 6.4.6:** Simulated concentration-time profile of the *Soai* reaction (25 mM 6-((Trimethylsilyl)ethynyl)nicotinaldehyde **TMSPyr-CHO**, 0.75 mM 2-Methyl-(6-((trimethylsilyl)ethynyl)-pyridine-3-yl)propanol **TMSPyr-OH** (*ee* > 99.9%) and 40 mM *i*Pr<sub>2</sub>Zn).

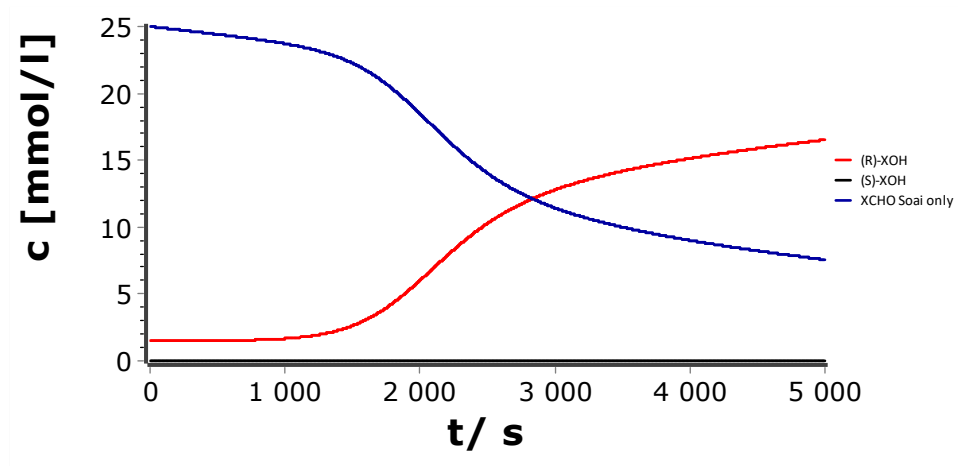

**Fig. 6.4.7:** Simulated concentration-time profile of the *Soai* reaction (25 mM 6-((Trimethylsilyl)ethynyl)nicotinaldehyde **TMSPyr-CHO**, 1.5 mM 2-Methyl-(6-((trimethylsilyl)ethynyl)-pyridine-3-yl)propanol **TMSPyr-OH** (*ee* > 99.9%) and 40 mM *i*Pr<sub>2</sub>Zn).

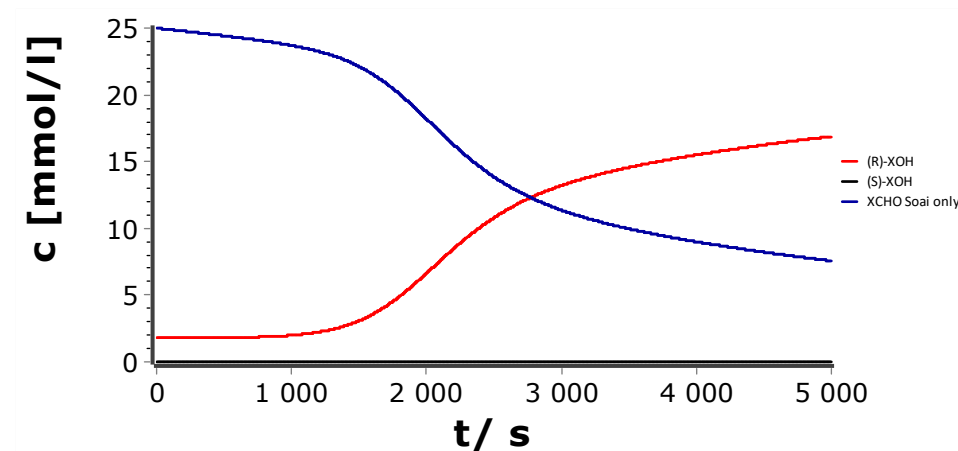

**Fig. 6.4.8:** Simulated concentration-time profile of the *Soai* reaction (25 mM 6-((Trimethylsilyl)ethynyl)nicotinaldehyde **TMSPyr-CHO**, 1.8 mM 2-Methyl-(6-((trimethylsilyl)ethynyl)-pyridine-3-yl)propanol **TMSPyr-OH** (*ee* > 99.9%) and 40 mM *i*Pr<sub>2</sub>Zn).

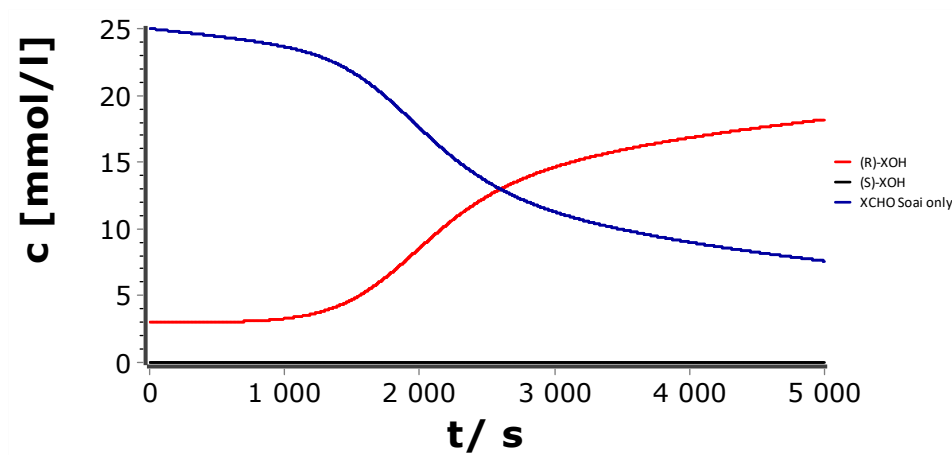

**Fig. 6.4.9:** Simulated concentration-time profile of the *Soai* reaction (25 mM 6-((Trimethylsilyl)ethynyl)nicotinaldehyde **TMSPyr-CHO**, 3.0 mM 2-Methyl-6-((trimethylsilyl)ethynyl)-pyridine-3-yl)propanol **TMSPyr-OH** ( $ee > 99.9\%$ ) and 40 mM  $i\text{Pr}_2\text{Zn}$ ).

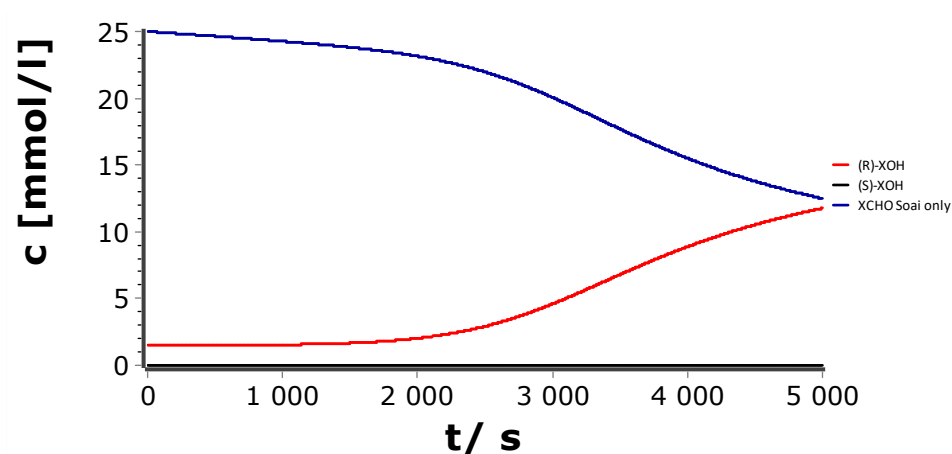

**Fig. 6.4.10:** Simulated concentration-time profile of the *Soai* reaction (25 mM 6-((Trimethylsilyl)ethynyl)nicotinaldehyde **TMSPyr-CHO**, 1.5 mM 2-Methyl-6-((trimethylsilyl)ethynyl)-pyridine-3-yl)propanol **TMSPyr-OH** ( $ee > 99.9\%$ ) and 25 mM  $i\text{Pr}_2\text{Zn}$ ).

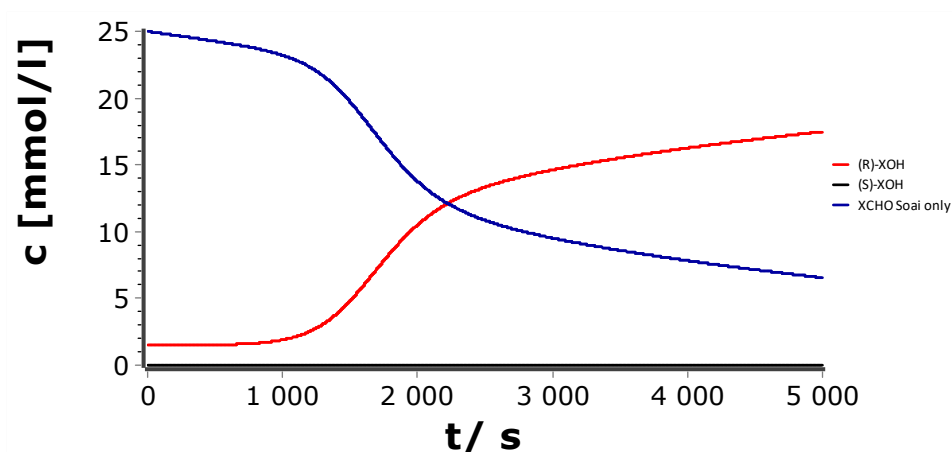

**Fig. 6.4.11:** Simulated concentration-time profile of the *Soai* reaction (25 mM 6-((Trimethylsilyl)ethynyl)nicotinaldehyde **TMSPyr-CHO**, 1.5 mM 2-Methyl-6-((trimethylsilyl)ethynyl)-pyridine-3-yl)propanol **TMSPyr-OH** ( $ee > 99.9\%$ ) and 50 mM  $i\text{Pr}_2\text{Zn}$ ).

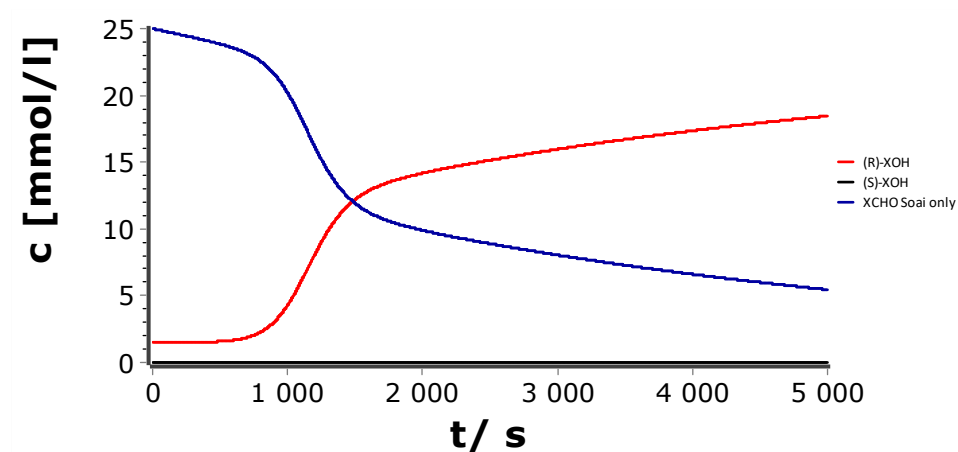

**Fig. 6.4.12:** Simulated concentration-time profile of the *Soai* reaction (25 mM 6-((Trimethylsilyl)ethynyl)nicotinaldehyde **TMSPyr-CHO**, 1.5 mM 2-Methyl-(6-((trimethylsilyl)ethynyl)-pyridine-3-yl)propanol **TMSPyr-OH** ( $ee > 99.9\%$ ) and 75 mM  $iPr_2Zn$ ).

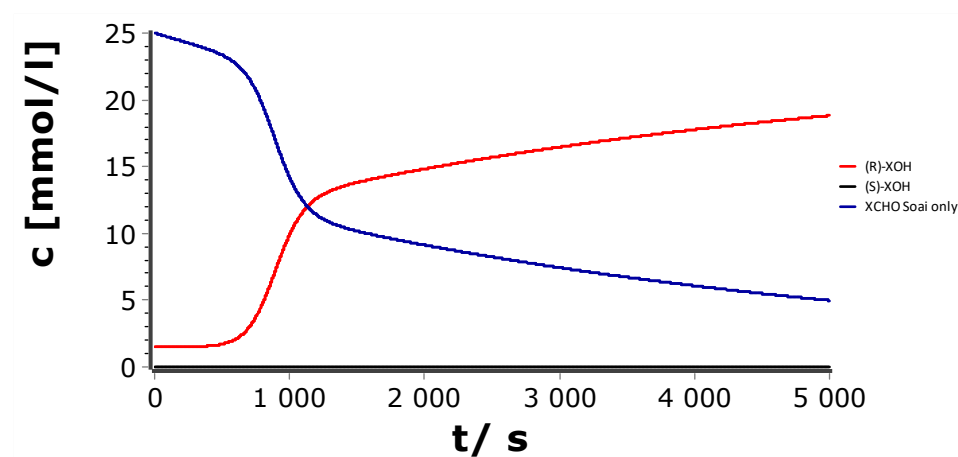

**Fig. 6.4.13:** Simulated concentration-time profile of the *Soai* reaction (25 mM 6-((Trimethylsilyl)ethynyl)nicotinaldehyde **TMSPyr-CHO**, 1.5 mM 2-Methyl-(6-((trimethylsilyl)ethynyl)-pyridine-3-yl)propanol **TMSPyr-OH** ( $ee > 99.9\%$ ) and 100 mM  $iPr_2Zn$ ).

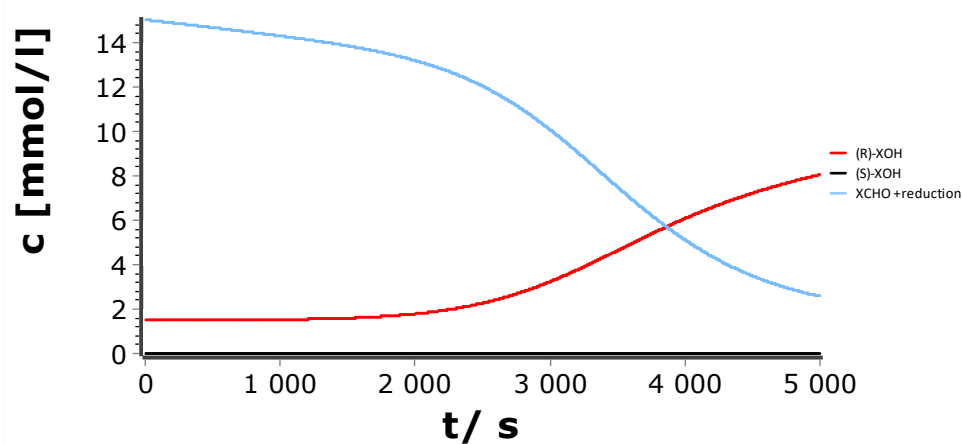

**Fig. 6.4.14:** Simulated concentration-time profile of the *Soai* reaction and the reduction side reaction (15 mM 6-((Trimethylsilyl)ethynyl)nicotinaldehyde **TMSPyr-CHO**, 1.5 mM 2-Methyl-(6-((trimethylsilyl)ethynyl)-pyridine-3-yl)propanol **TMSPyr-OH** ( $ee > 99.9\%$ ) and 40 mM  $iPr_2Zn$ ).

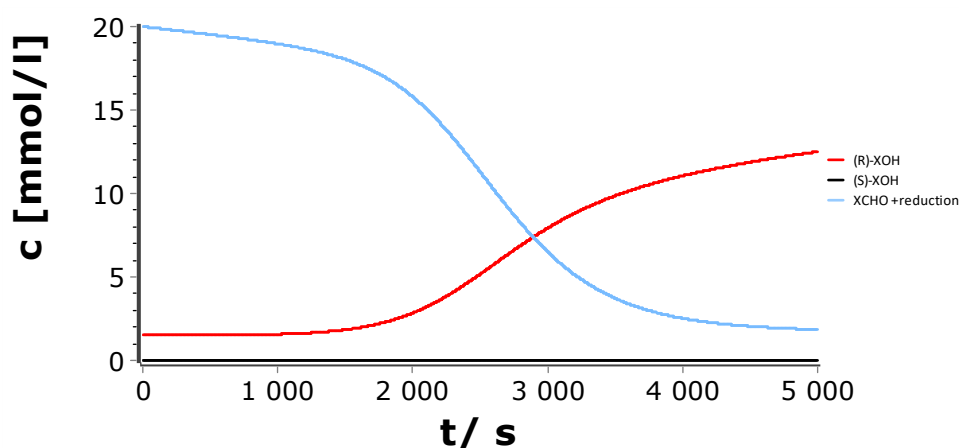

**Fig. 6.4.15:** Simulated concentration-time profile of the *Soai* reaction and the reduction side reaction (20 mM 6-((Trimethylsilyl)ethynyl)nicotinaldehyde **TMSPyr-CHO**, 1.5 mM 2-Methyl-(6-((trimethylsilyl)ethynyl)-pyridine-3-yl)propanol **TMSPyr-OH** (*ee* > 99.9%) and 40 mM *i*Pr<sub>2</sub>Zn).

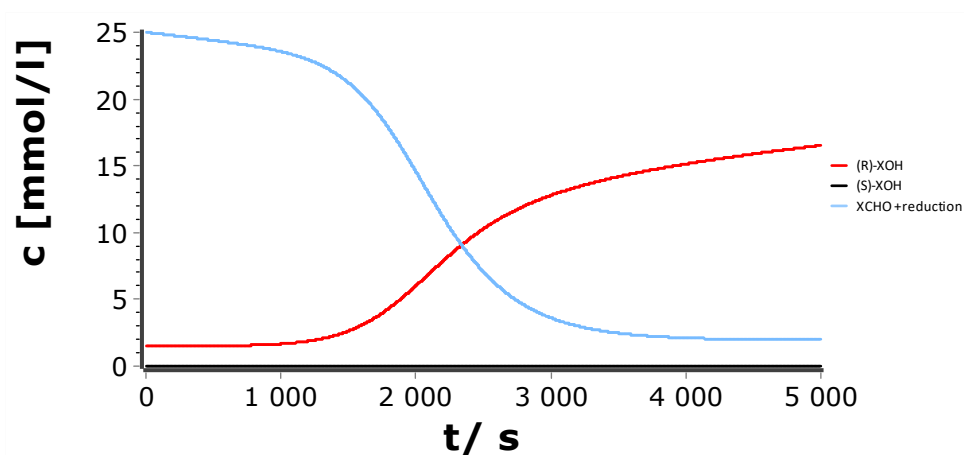

**Fig. 6.4.16:** Simulated concentration-time profile of the *Soai* reaction and the reduction side reaction (25 mM 6-((Trimethylsilyl)ethynyl)nicotinaldehyde **TMSPyr-CHO**, 1.5 mM 2-Methyl-(6-((trimethylsilyl)ethynyl)-pyridine-3-yl)propanol **TMSPyr-OH** (*ee* > 99.9%) and 40 mM *i*Pr<sub>2</sub>Zn).

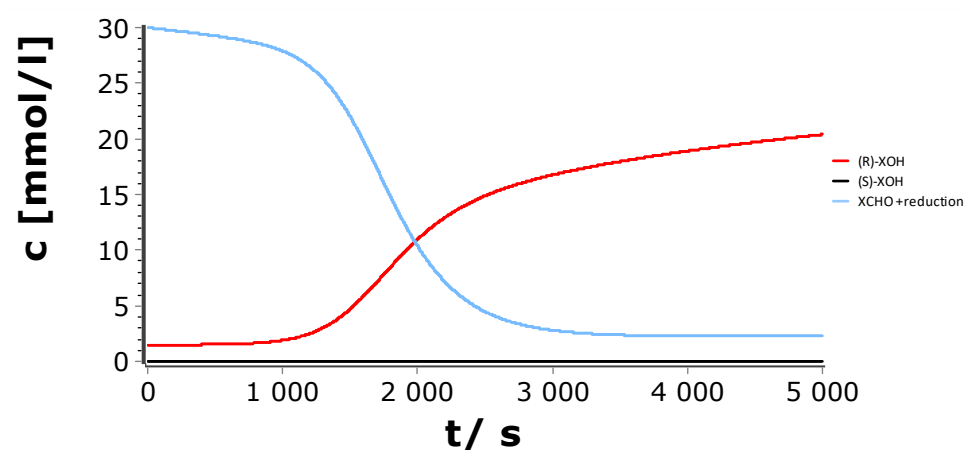

**Fig. 6.4.17:** Simulated concentration-time profile of the *Soai* reaction and the reduction side reaction (30 mM 6-((Trimethylsilyl)ethynyl)nicotinaldehyde **TMSPyr-CHO**, 1.5 mM 2-Methyl-(6-((trimethylsilyl)ethynyl)-pyridine-3-yl)propanol **TMSPyr-OH** (*ee* > 99.9%) and 40 mM *i*Pr<sub>2</sub>Zn).



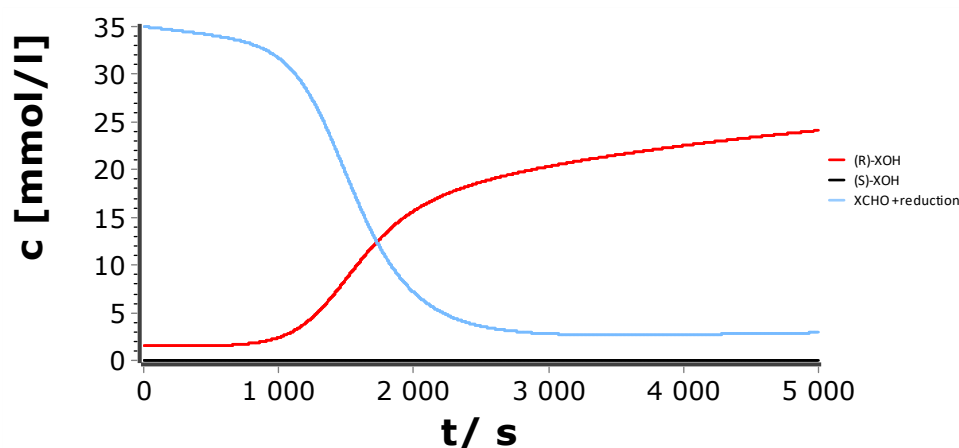

**Fig. 6.4.18:** Simulated concentration-time profile of the *Soai* reaction and the reduction side reaction (35 mM 6-((Trimethylsilyl)ethynyl)nicotinaldehyde **TMSPyr-CHO**, 1.5 mM 2-Methyl-(6-((trimethylsilyl)ethynyl)-pyridine-3-yl)propanol **TMSPyr-OH** (*ee* > 99.9%) and 40 mM *i*Pr<sub>2</sub>Zn).

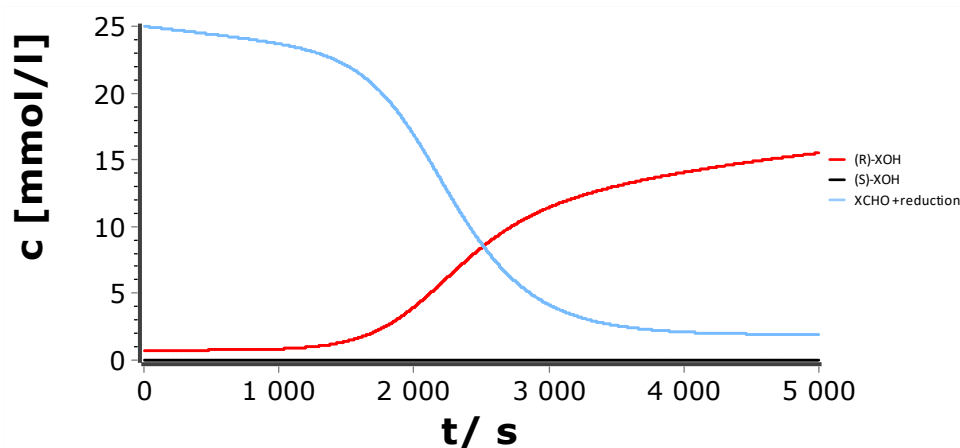

**Fig. 6.4.19:** Simulated concentration-time profile of the *Soai* reaction and the reduction side reaction (25 mM 6-((Trimethylsilyl)ethynyl)nicotinaldehyde **TMSPyr-CHO**, 0.75 mM 2-Methyl-(6-((trimethylsilyl)ethynyl)-pyridine-3-yl)propanol **TMSPyr-OH** (*ee* > 99.9%) and 40 mM *i*Pr<sub>2</sub>Zn).

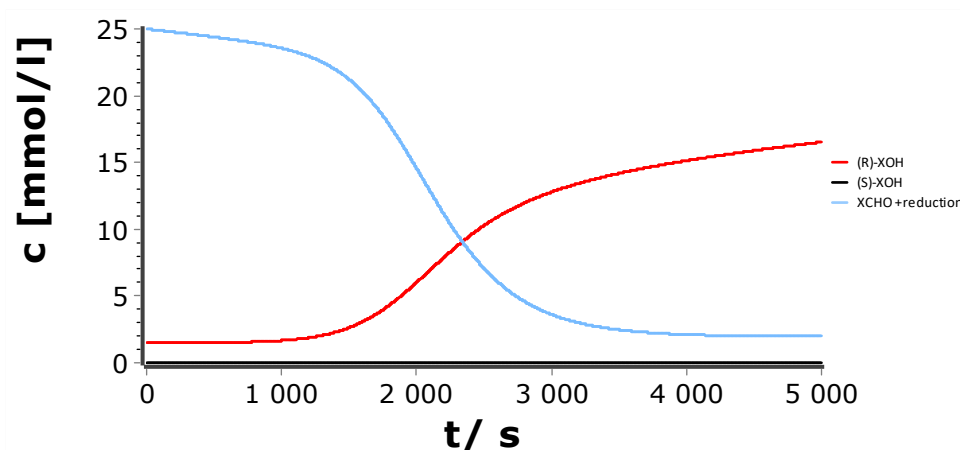

**Fig. 6.4.20:** Simulated concentration-time profile of the *Soai* reaction and the reduction side reaction (25 mM 6-((Trimethylsilyl)ethynyl)nicotinaldehyde **TMSPyr-CHO**, 1.5 mM 2-Methyl-(6-((trimethylsilyl)ethynyl)-pyridine-3-yl)propanol **TMSPyr-OH** (*ee* > 99.9%) and 40 mM *i*Pr<sub>2</sub>Zn).

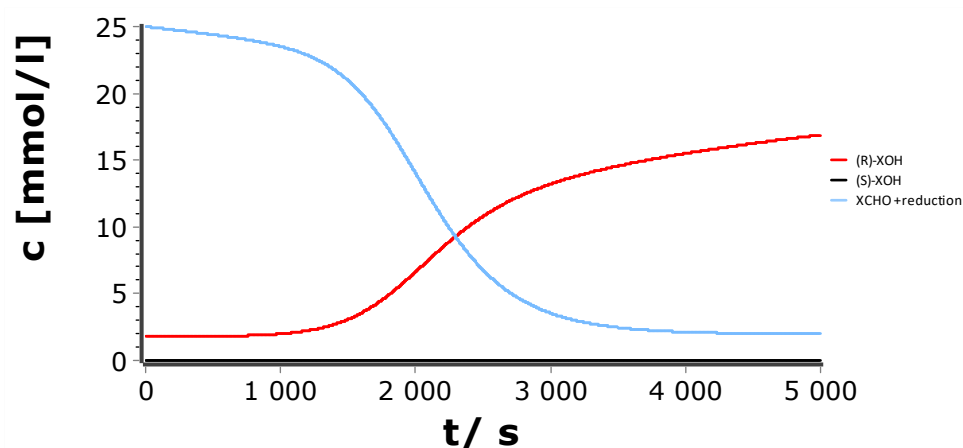

**Fig. 6.4.21:** Simulated concentration-time profile of the *Soai* reaction and the reduction side reaction (25 mM 6-((Trimethylsilyl)ethynyl)nicotinaldehyde **TMSPyr-CHO**, 1.8 mM 2-Methyl-(6-((trimethylsilyl)ethynyl)-pyridine-3-yl)propanol **TMSPyr-OH** (*ee* > 99.9%) and 40 mM *i*Pr<sub>2</sub>Zn).

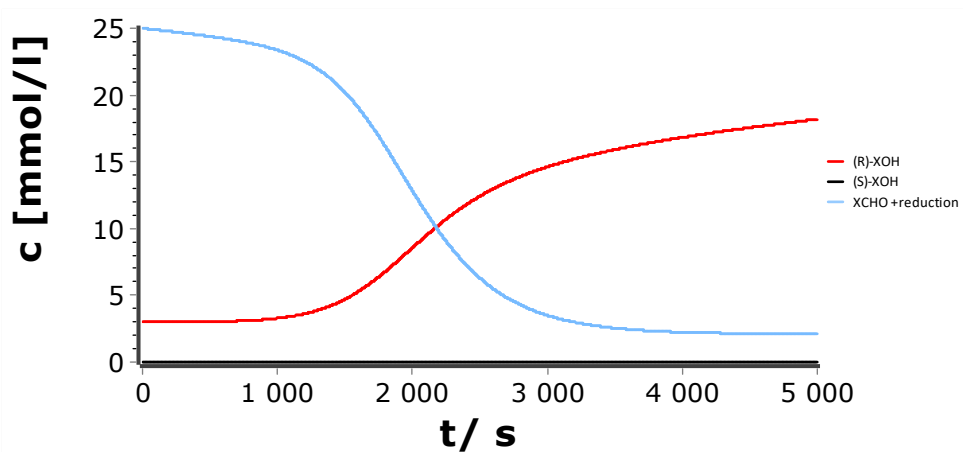

**Fig. 6.4.22:** Simulated concentration-time profile of the *Soai* reaction and the reduction side reaction (25 mM 6-((Trimethylsilyl)ethynyl)nicotinaldehyde **TMSPyr-CHO**, 3.0 mM 2-Methyl-(6-((trimethylsilyl)ethynyl)-pyridine-3-yl)propanol **TMSPyr-OH** (*ee* > 99.9%) and 40 mM *i*Pr<sub>2</sub>Zn).

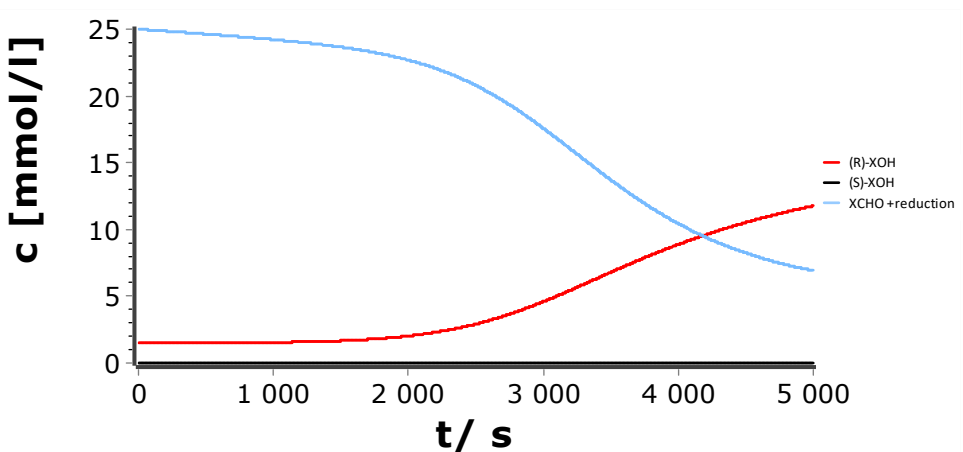

**Fig. 6.4.23:** Simulated concentration-time profile of the *Soai* reaction and the reduction side reaction (25 mM 6-((Trimethylsilyl)ethynyl)nicotinaldehyde **TMSPyr-CHO**, 1.5 mM 2-Methyl-(6-((trimethylsilyl)ethynyl)-pyridine-3-yl)propanol **TMSPyr-OH** (*ee* > 99.9%) and 25 mM *i*Pr<sub>2</sub>Zn).

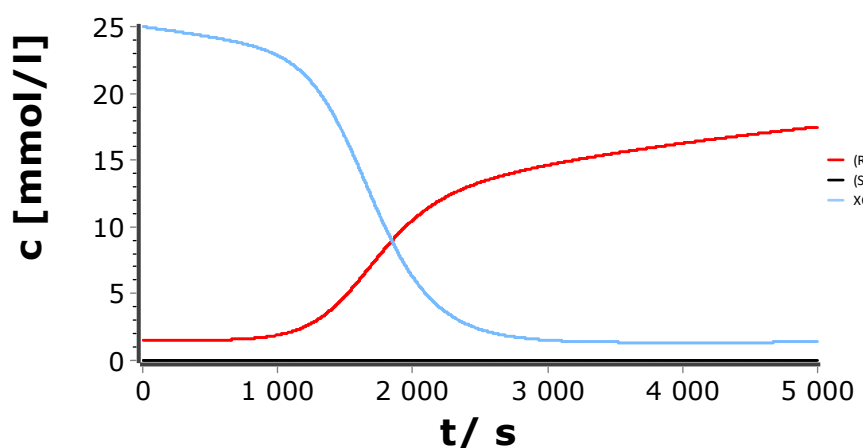

**Fig. 6.4.24:** Simulated concentration-time profile of the *Soai* reaction and the reduction side reaction (25 mM 6-((Trimethylsilyl)ethynyl)nicotinaldehyde **TMSPyr-CHO**, 1.5 mM 2-Methyl-(6-((trimethylsilyl)ethynyl)-pyridine-3-yl)propanol **TMSPyr-OH** (*ee* > 99.9%) and 50 mM *iPr*<sub>2</sub>Zn).

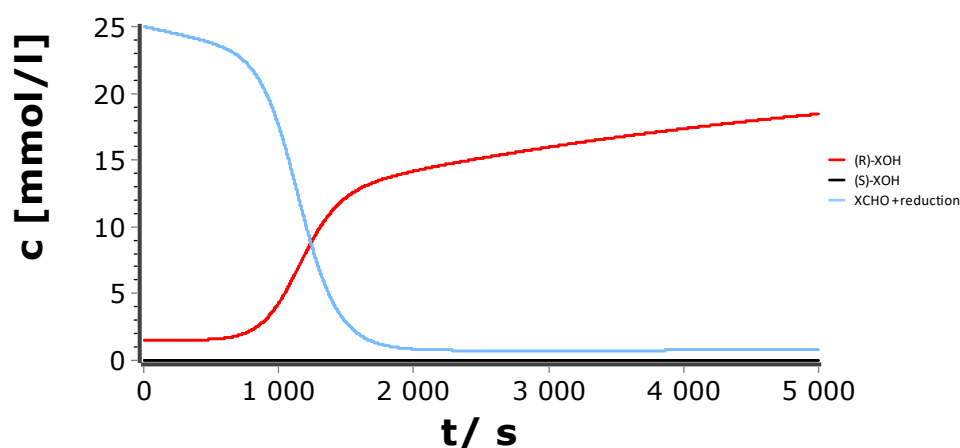

**Fig. 6.4.25:** Simulated concentration-time profile of the *Soai* reaction and the reduction side reaction (25 mM 6-((Trimethylsilyl)ethynyl)nicotinaldehyde **TMSPyr-CHO**, 1.5 mM 2-Methyl-(6-((trimethylsilyl)ethynyl)-pyridine-3-yl)propanol **TMSPyr-OH** (*ee* > 99.9%) and 75 mM *iPr*<sub>2</sub>Zn).

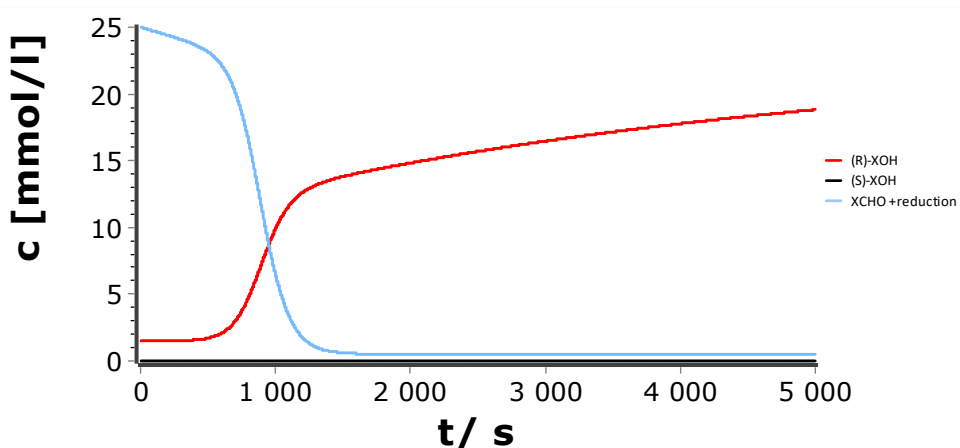

**Fig. 6.4.26:** Simulated concentration-time profile of the *Soai* reaction and the reduction side reaction (25 mM 6-((Trimethylsilyl)ethynyl)nicotinaldehyde **TMSPyr-CHO**, 1.5 mM 2-Methyl-(6-((trimethylsilyl)ethynyl)-pyridine-3-yl)propanol **TMSPyr-OH** (*ee* > 99.9%) and 100 mM *iPr*<sub>2</sub>Zn).

#### 6.4.2 AdPyr-CHO/AdPyr-OH System

**Table 6.4.2:** Simulation Parameters for the AdPyr-CHO/AdPyr-OH System.

|    | AdPyrCHO<br>[mmol/L] | (R)-AdPyrOH<br>[mmol/L] | (S)-AdPyrOH<br>[mmol/L] | ee [%] | er   | ZnPr <sub>2</sub><br>[mmol/L] | t [s] |
|----|----------------------|-------------------------|-------------------------|--------|------|-------------------------------|-------|
| 1  | 36                   | 2.9985                  | 0.0015                  | 99.9   | 1999 | 40                            | 4800  |
| 2  | 40                   | 2.9985                  | 0.0015                  | 99.9   | 1999 | 40                            | 4800  |
| 3  | 45                   | 2.9985                  | 0.0015                  | 99.9   | 1999 | 40                            | 4800  |
| 4  | 56                   | 2.9985                  | 0.0015                  | 99.9   | 1999 | 40                            | 4800  |
| 5  | 65                   | 2.9985                  | 0.0015                  | 99.9   | 1999 | 40                            | 4800  |
| 6  | 40                   | 1.5992                  | 0.0008                  | 99.9   | 1999 | 40                            | 4800  |
| 7  | 40                   | 2.49875                 | 0.00125                 | 99.9   | 1999 | 40                            | 4800  |
| 8  | 40                   | 2.9985                  | 0.0015                  | 99.9   | 1999 | 40                            | 4800  |
| 9  | 40                   | 3.49825                 | 0.00175                 | 99.9   | 1999 | 40                            | 4800  |
| 10 | 40                   | 2.9985                  | 0.0015                  | 99.9   | 1999 | 25                            | 4800  |
| 11 | 40                   | 2.9985                  | 0.0015                  | 99.9   | 1999 | 50                            | 4800  |
| 12 | 40                   | 2.9985                  | 0.0015                  | 99.9   | 1999 | 75                            | 4800  |
| 13 | 40                   | 2.9985                  | 0.0015                  | 99.9   | 1999 | 100                           | 4800  |

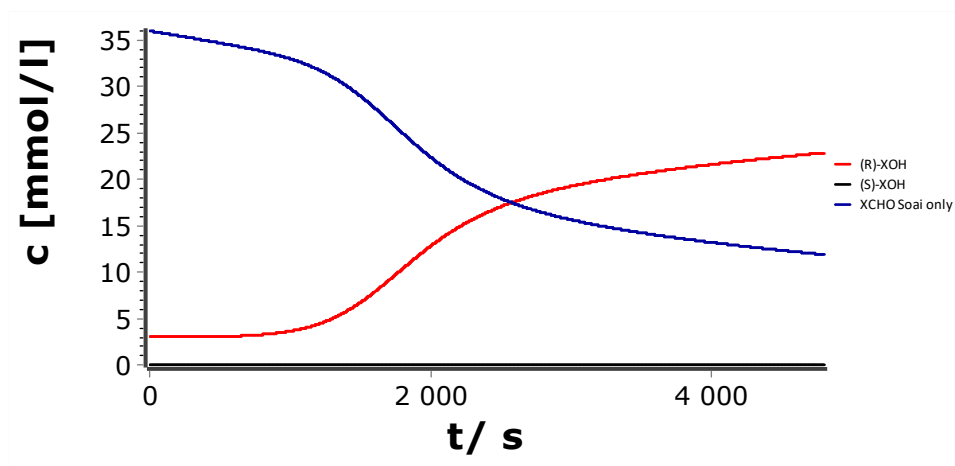

**Fig. 6.4.27:** Simulated concentration-time profile of the *Soai* reaction (36 mM 6-((adamantan-1-yl)ethynyl)nicotinaldehyde **AdPyr-CHO**, 3.0 mM (1R)-1-(6-((adamantan-1-yl)ethynyl)pyridin-3-yl)-2-methylpropan-1-ol **AdPyr-OH** (*ee* > 99.9%) and 40 mM *i*Pr<sub>2</sub>Zn).

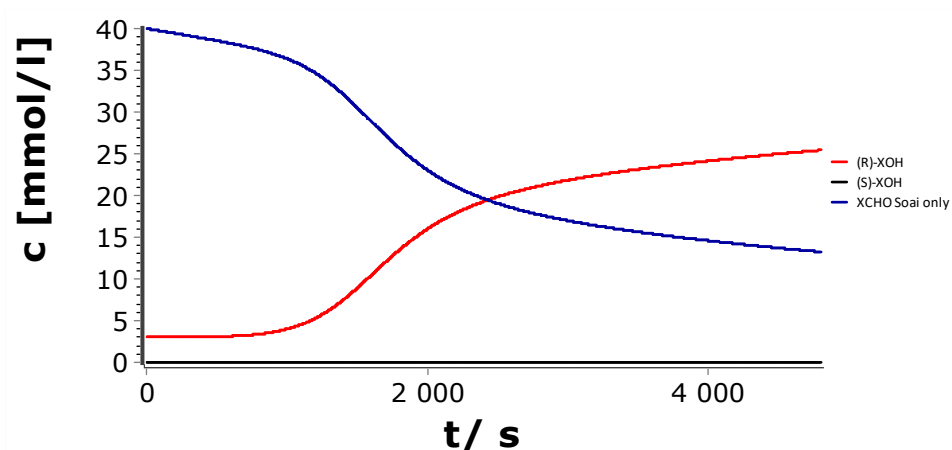

**Fig. 6.4.28:** Simulated concentration-time profile of the *Soai* reaction (40 mM 6-((adamantan-1-yl)ethynyl)nicotinaldehyde **AdPyr-CHO**, 3.0 mM (1R)-1-(6-((adamantan-1-yl)ethynyl)pyridin-3-yl)-2-methylpropan-1-ol **AdPyr-OH** ( $ee > 99.9\%$ ) and 40 mM  $i\text{Pr}_2\text{Zn}$ ).

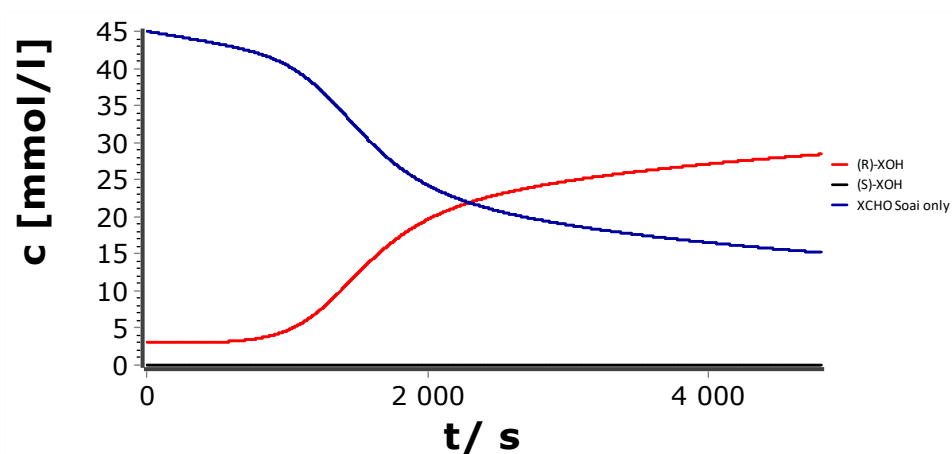

**Fig. 6.4.29:** Simulated concentration-time profile of the *Soai* reaction (45 mM 6-((adamantan-1-yl)ethynyl)nicotinaldehyde **AdPyr-CHO**, 3.0 mM (1R)-1-(6-((adamantan-1-yl)ethynyl)pyridin-3-yl)-2-methylpropan-1-ol **AdPyr-OH** ( $ee > 99.9\%$ ) and 40 mM  $i\text{Pr}_2\text{Zn}$ ).

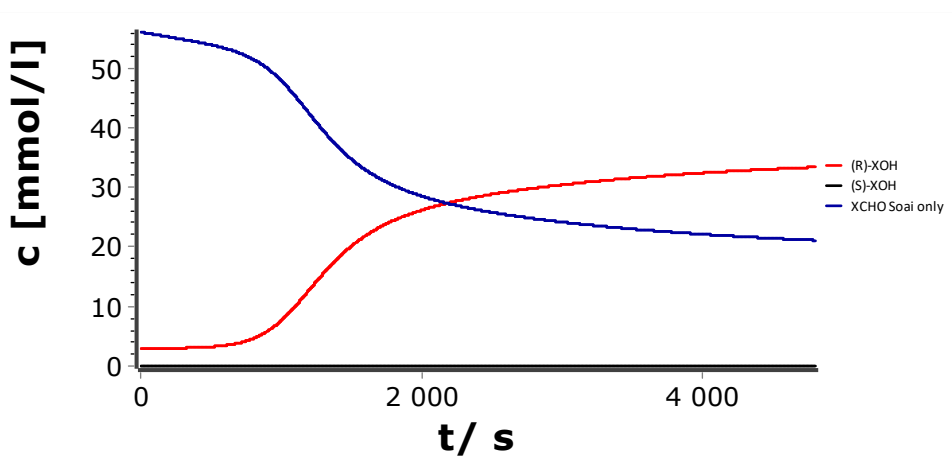

**Fig. 6.4.30:** Simulated concentration-time profile of the *Soai* reaction (56 mM 6-((adamantan-1-yl)ethynyl)nicotinaldehyde **AdPyr-CHO**, 3.0 mM (1R)-1-(6-((adamantan-1-yl)ethynyl)pyridin-3-yl)-2-methylpropan-1-ol **AdPyr-OH** ( $ee > 99.9\%$ ) and 40 mM  $i\text{Pr}_2\text{Zn}$ ).

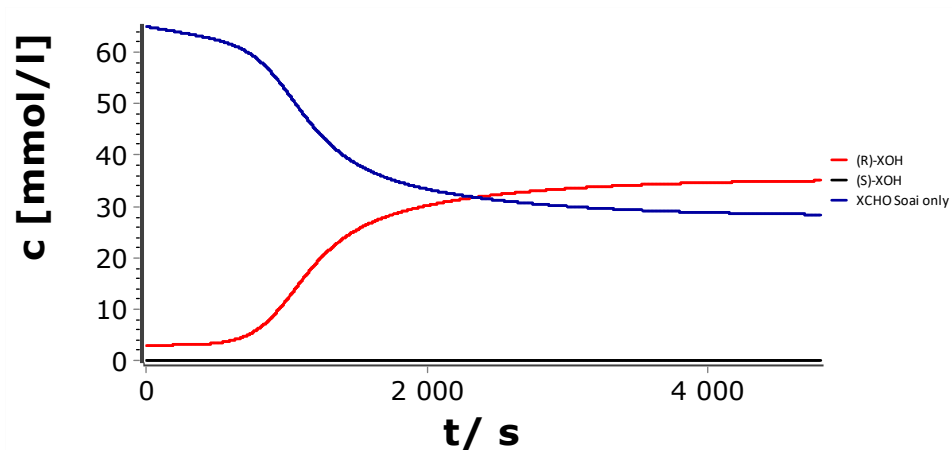

**Fig. 6.4.31:** Simulated concentration-time profile of the *Soai* reaction (65 mM 6-((adamantan-1-yl)ethynyl)nicotinaldehyde **AdPyr-CHO**, 3.0 mM (1R)-1-(6-((adamantan-1-yl)ethynyl)pyridin-3-yl)-2-methylpropan-1-ol **AdPyr-OH** (*ee* > 99.9%) and 40 mM *i*Pr<sub>2</sub>Zn).

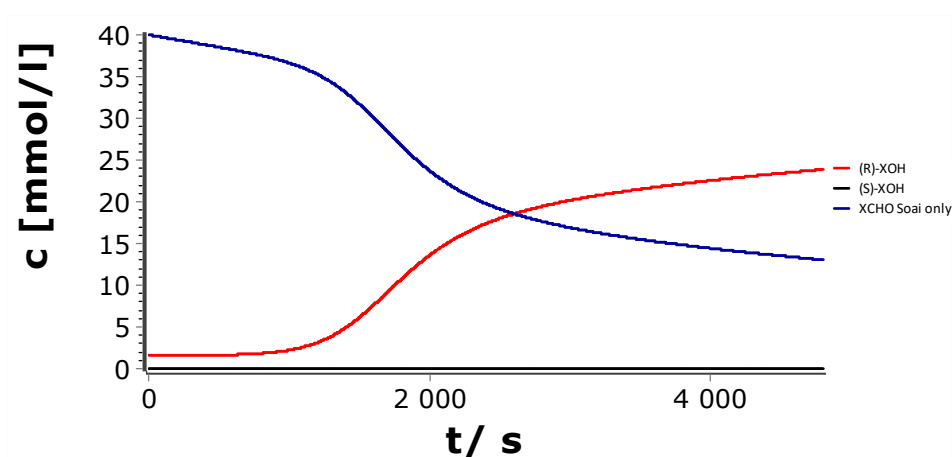

**Fig. 6.4.32:** Simulated concentration-time profile of the *Soai* reaction (40 mM 6-((adamantan-1-yl)ethynyl)nicotinaldehyde **AdPyr-CHO**, 1.6 mM (1R)-1-(6-((adamantan-1-yl)ethynyl)pyridin-3-yl)-2-methylpropan-1-ol **AdPyr-OH** (*ee* > 99.9%) and 40 mM *i*Pr<sub>2</sub>Zn).

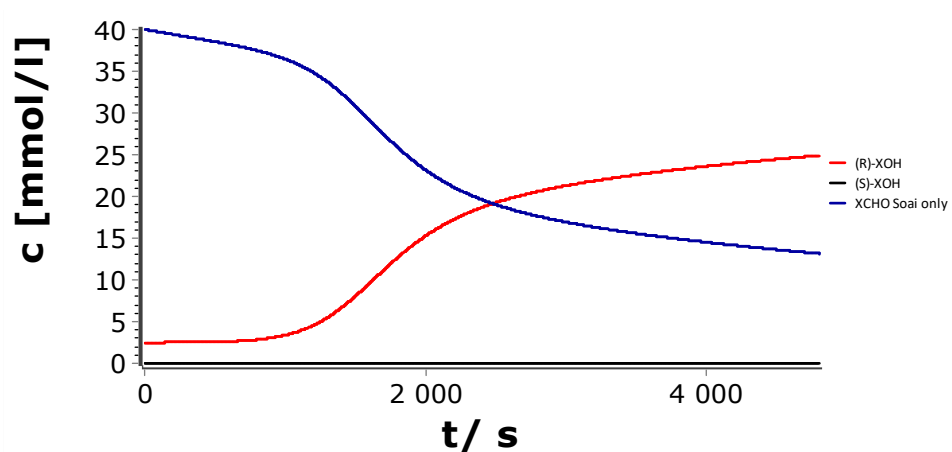

**Fig. 6.4.33:** Simulated concentration-time profile of the *Soai* reaction (40 mM 6-((adamantan-1-yl)ethynyl)nicotinaldehyde **AdPyr-CHO**, 2.5 mM (1R)-1-(6-((adamantan-1-yl)ethynyl)pyridin-3-yl)-2-methylpropan-1-ol **AdPyr-OH** (*ee* > 99.9%) and 40 mM *i*Pr<sub>2</sub>Zn).

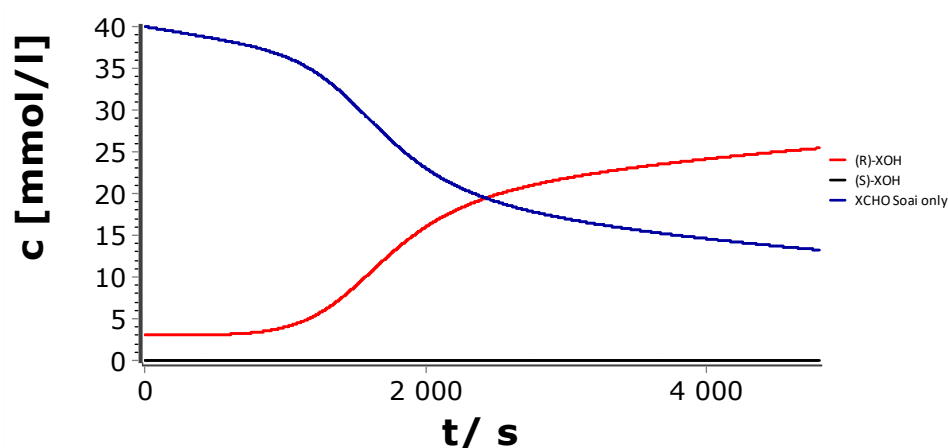

**Fig. 6.4.34:** Simulated concentration-time profile of the *Soai* reaction (40 mM 6-((adamantan-1-yl)ethynyl)nicotinaldehyde **AdPyr-CHO**, 3.0 mM (1R)-1-(6-((adamantan-1-yl)ethynyl)pyridin-3-yl)-2-methylpropan-1-ol **AdPyr-OH** (*ee* > 99.9%) and 40 mM *i*Pr<sub>2</sub>Zn).

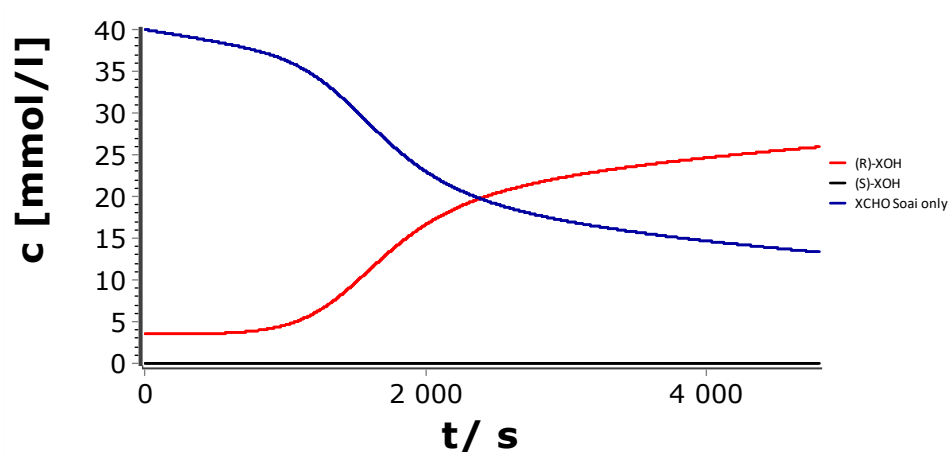

**Fig. 6.4.35:** Simulated concentration-time profile of the *Soai* reaction (40 mM 6-((adamantan-1-yl)ethynyl)nicotinaldehyde **AdPyr-CHO**, 3.5 mM (1R)-1-(6-((adamantan-1-yl)ethynyl)pyridin-3-yl)-2-methylpropan-1-ol **AdPyr-OH** (*ee* > 99.9%) and 40 mM *i*Pr<sub>2</sub>Zn).

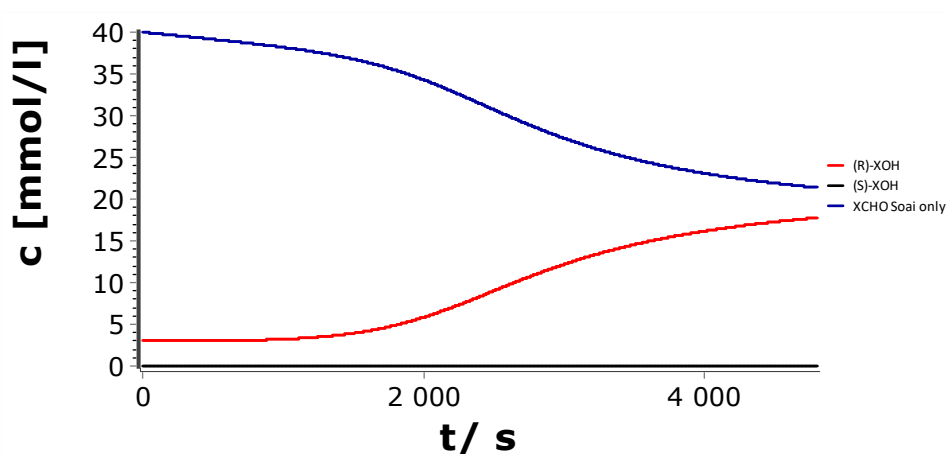

**Fig. 6.4.36:** Simulated concentration-time profile of the *Soai* reaction (40 mM 6-((adamantan-1-yl)ethynyl)nicotinaldehyde **AdPyr-CHO**, 3.0 mM (1R)-1-(6-((adamantan-1-yl)ethynyl)pyridin-3-yl)-2-methylpropan-1-ol **AdPyr-OH** (*ee* > 99.9%) and 25 mM *i*Pr<sub>2</sub>Zn).

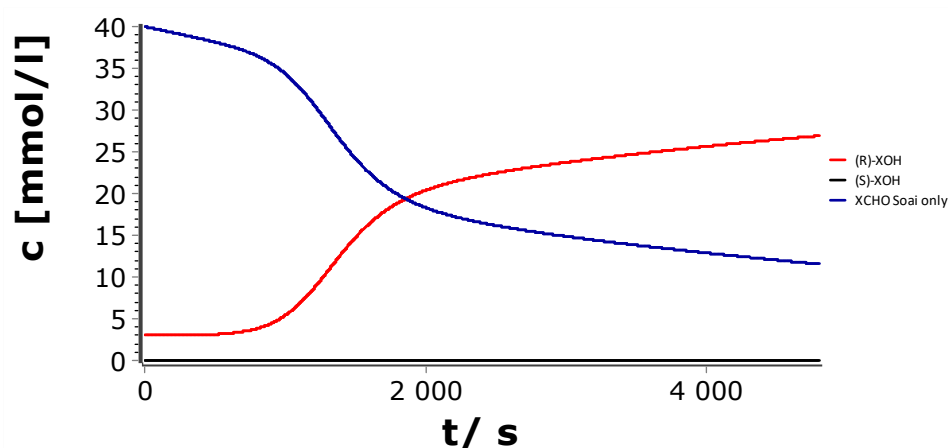

**Fig. 6.4.37:** Simulated concentration-time profile of the *Soai* reaction (40 mM 6-((adamantan-1-yl)ethynyl)nicotinaldehyde **AdPyr-CHO**, 3.0 mM (1R)-1-(6-((adamantan-1-yl)ethynyl)pyridin-3-yl)-2-methylpropan-1-ol **AdPyr-OH** ( $ee > 99.9\%$ ) and 50 mM  $i\text{Pr}_2\text{Zn}$ ).

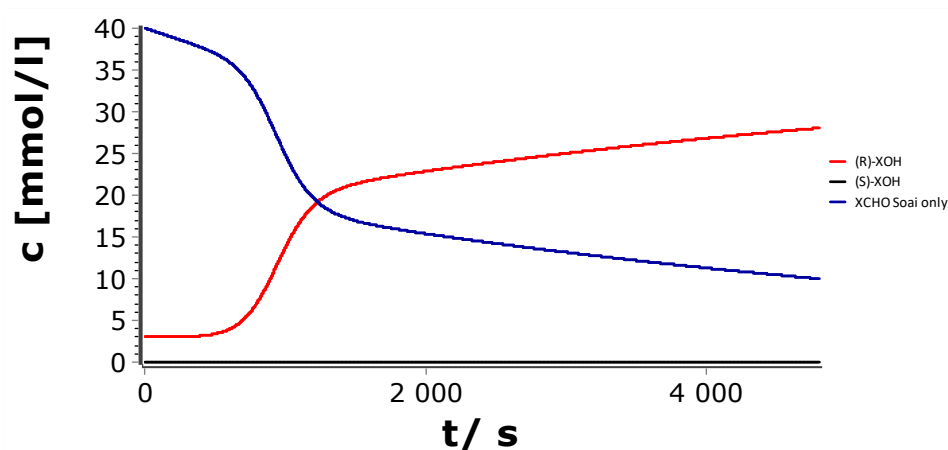

**Fig. 6.4.38:** Simulated concentration-time profile of the *Soai* reaction (40 mM 6-((adamantan-1-yl)ethynyl)nicotinaldehyde **AdPyr-CHO**, 3.0 mM (1R)-1-(6-((adamantan-1-yl)ethynyl)pyridin-3-yl)-2-methylpropan-1-ol **AdPyr-OH** ( $ee > 99.9\%$ ) and 75 mM  $i\text{Pr}_2\text{Zn}$ ).

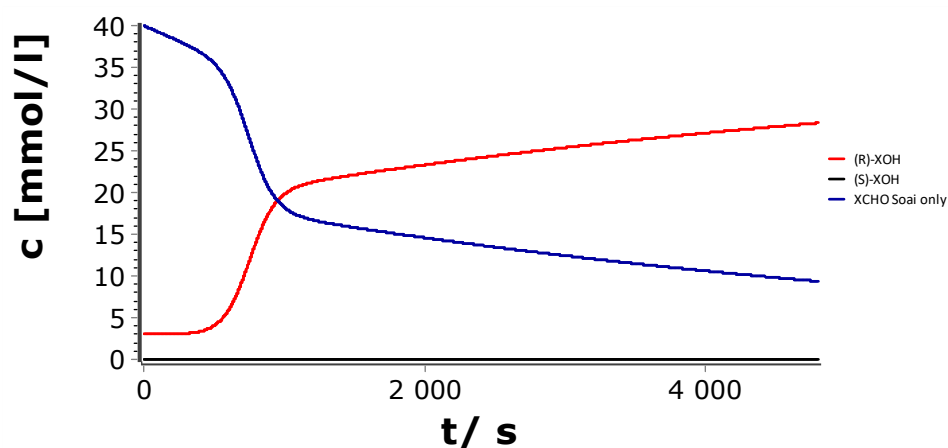

**Fig. 6.4.39:** Simulated concentration-time profile of the *Soai* reaction (40 mM 6-((adamantan-1-yl)ethynyl)nicotinaldehyde **AdPyr-CHO**, 3.0 mM (1R)-1-(6-((adamantan-1-yl)ethynyl)pyridin-3-yl)-2-methylpropan-1-ol **AdPyr-OH** ( $ee > 99.9\%$ ) and 100 mM  $i\text{Pr}_2\text{Zn}$ ).



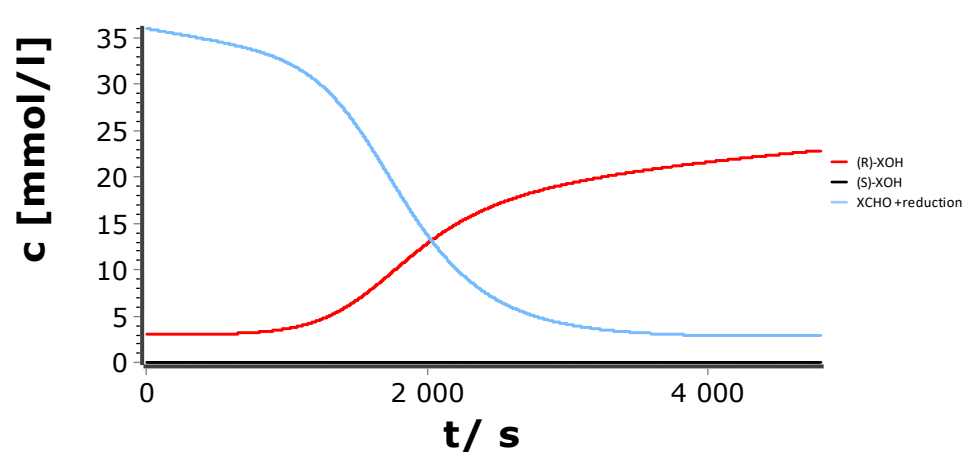

**Fig. 6.4.40:** Simulated concentration-time profile of the *Soai* reaction and the reduction side reaction (36 mM 6-((adamantan-1-yl)ethynyl)nicotinaldehyde **AdPyr-CHO**, 3.0 mM (1R)-1-(6-((adamantan-1-yl)ethynyl)pyridin-3-yl)-2-methylpropan-1-ol **AdPyr-OH** (*ee* > 99.9%) and 40 mM *i*Pr<sub>2</sub>Zn).

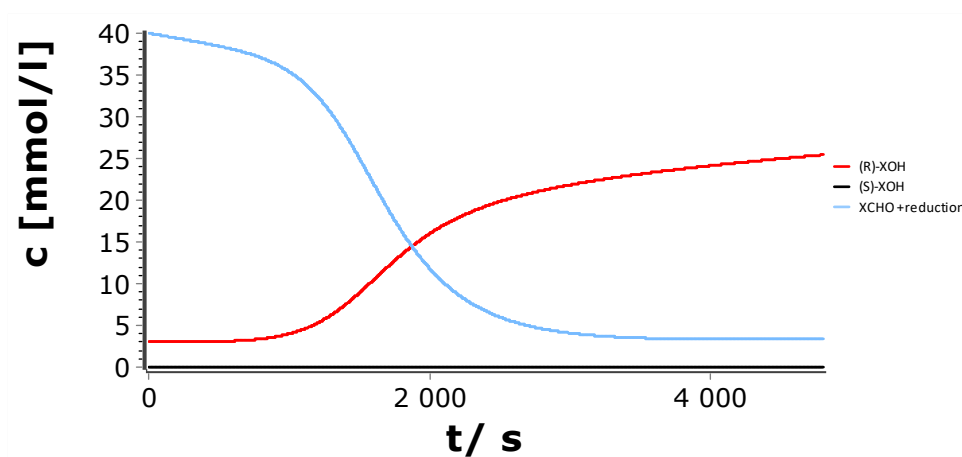

**Fig. 6.4.41:** Simulated concentration-time profile of the *Soai* reaction and the reduction side reaction (40 mM 6-((adamantan-1-yl)ethynyl)nicotinaldehyde **AdPyr-CHO**, 3.0 mM (1R)-1-(6-((adamantan-1-yl)ethynyl)pyridin-3-yl)-2-methylpropan-1-ol **AdPyr-OH** (*ee* > 99.9%) and 40 mM *i*Pr<sub>2</sub>Zn).

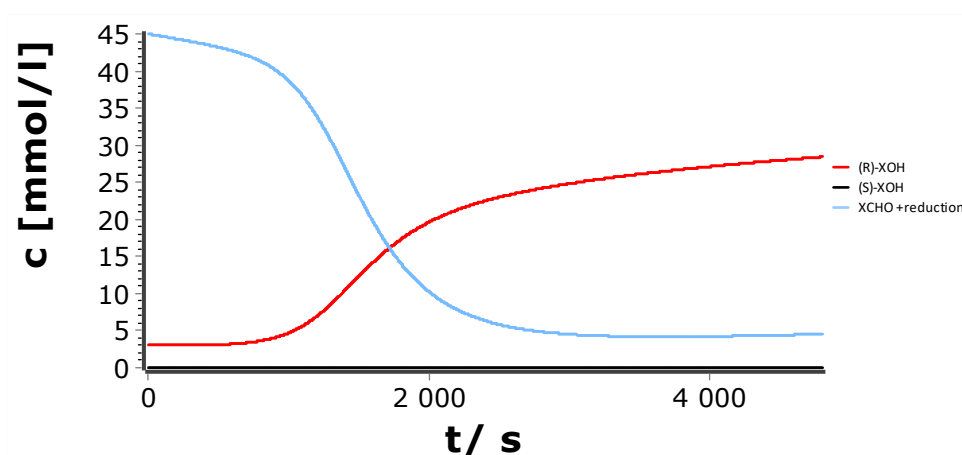

**Fig. 6.4.42:** Simulated concentration-time profile of the *Soai* reaction and the reduction side reaction (45 mM 6-((adamantan-1-yl)ethynyl)nicotinaldehyde **AdPyr-CHO**, 3.0 mM (1R)-1-(6-((adamantan-1-yl)ethynyl)pyridin-3-yl)-2-methylpropan-1-ol **AdPyr-OH** (*ee* > 99.9%) and 40 mM *i*Pr<sub>2</sub>Zn).

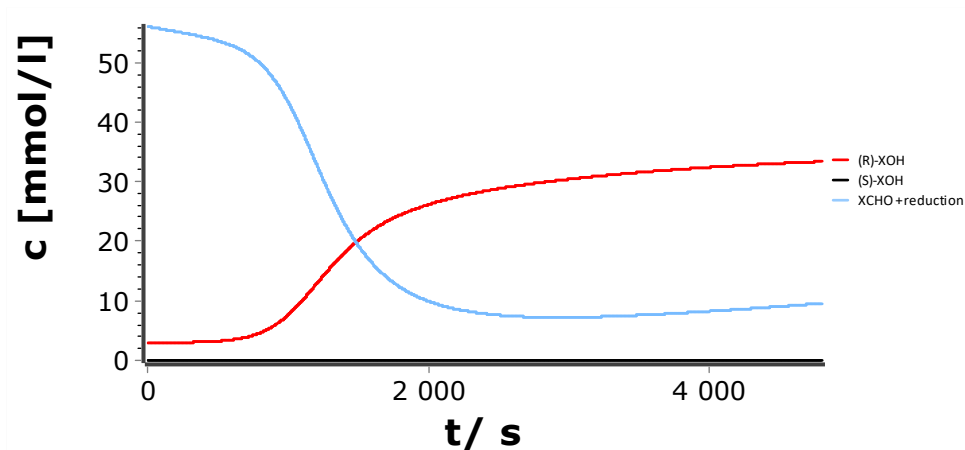

**Fig. 6.4.43:** Simulated concentration-time profile of the *Soai* reaction and the reduction side reaction (56 mM 6-((adamantan-1-yl)ethynyl)nicotinaldehyde **AdPyr-CHO**, 3.0 mM (1R)-1-(6-((adamantan-1-yl)ethynyl)pyridin-3-yl)-2-methylpropan-1-ol **AdPyr-OH** (*ee* > 99.9%) and 40 mM *i*Pr<sub>2</sub>Zn).

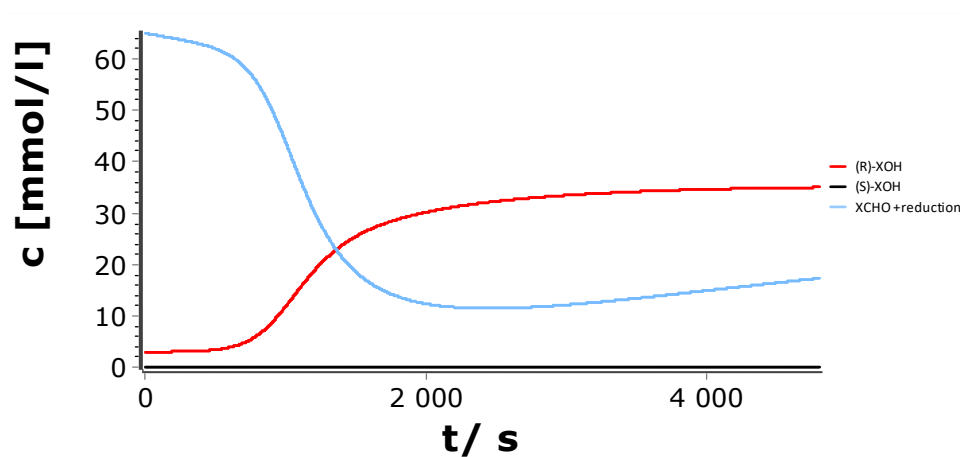

**Fig. 6.4.44:** Simulated concentration-time profile of the *Soai* reaction and the reduction side reaction (65 mM 6-((adamantan-1-yl)ethynyl)nicotinaldehyde **AdPyr-CHO**, 3.0 mM (1R)-1-(6-((adamantan-1-yl)ethynyl)pyridin-3-yl)-2-methylpropan-1-ol **AdPyr-OH** (*ee* > 99.9%) and 40 mM *i*Pr<sub>2</sub>Zn).

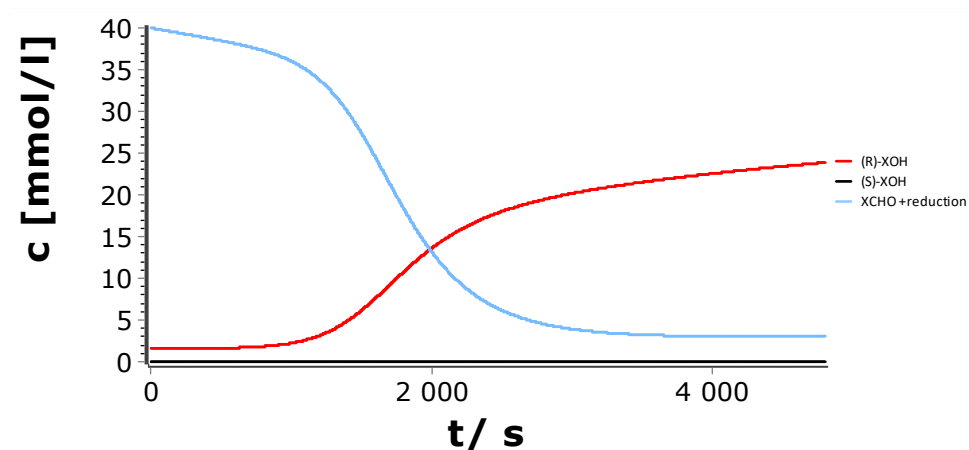

**Fig. 6.4.45:** Simulated concentration-time profile of the *Soai* reaction and the reduction side reaction (40 mM 6-((adamantan-1-yl)ethynyl)nicotinaldehyde **AdPyr-CHO**, 1.6 mM (1R)-1-(6-((adamantan-1-yl)ethynyl)pyridin-3-yl)-2-methylpropan-1-ol **AdPyr-OH** (*ee* > 99.9%) and 40 mM *i*Pr<sub>2</sub>Zn).

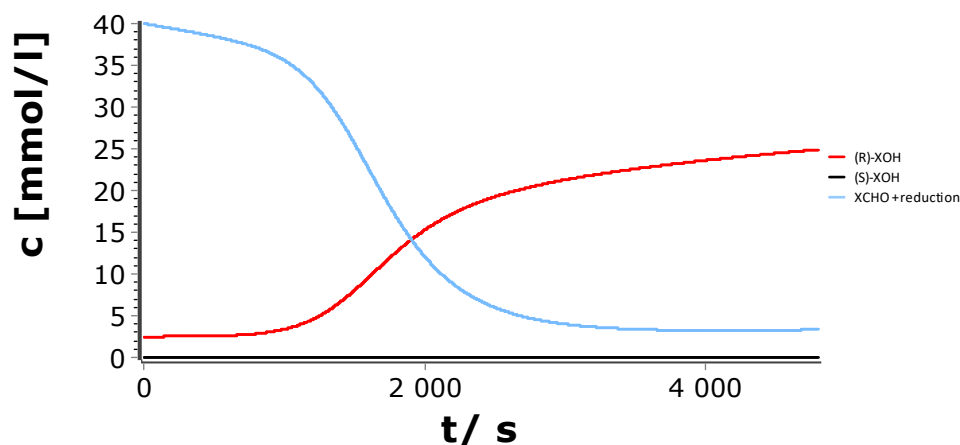

**Fig. 6.4.46:** Simulated concentration-time profile of the *Soai* reaction and the reduction side reaction (40 mM 6-((adamantan-1-yl)ethynyl)nicotinaldehyde **AdPyr-CHO**, 2.5 mM (1R)-1-(6-((adamantan-1-yl)ethynyl)pyridin-3-yl)-2-methylpropan-1-ol **AdPyr-OH** (*ee* > 99.9%) and 40 mM *i*Pr<sub>2</sub>Zn).

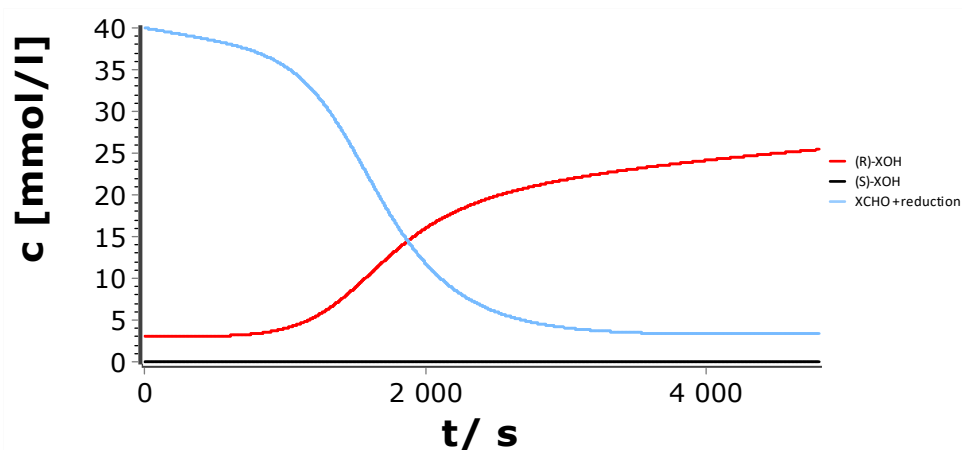

**Fig. 6.4.47:** Simulated concentration-time profile of the *Soai* reaction and the reduction side reaction (40 mM 6-((adamantan-1-yl)ethynyl)nicotinaldehyde **AdPyr-CHO**, 3.0 mM (1R)-1-(6-((adamantan-1-yl)ethynyl)pyridin-3-yl)-2-methylpropan-1-ol **AdPyr-OH** (*ee* > 99.9%) and 40 mM *i*Pr<sub>2</sub>Zn).

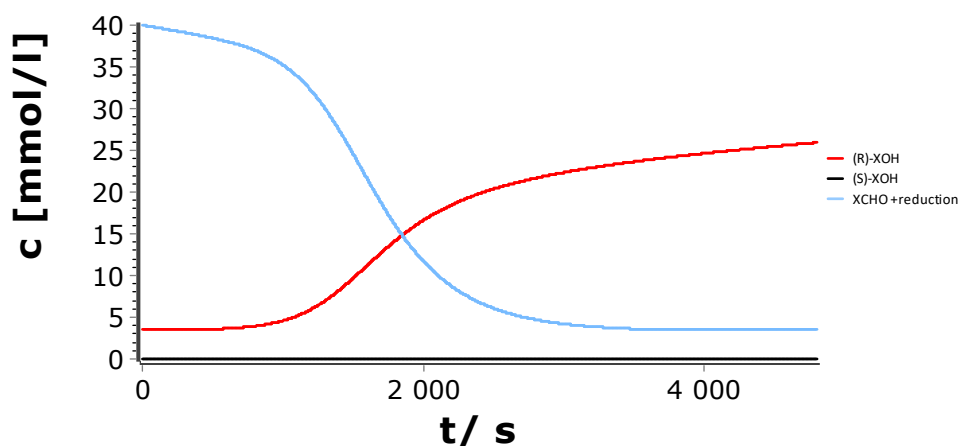

**Fig. 6.4.48:** Simulated concentration-time profile of the *Soai* reaction and the reduction side reaction (40 mM 6-((adamantan-1-yl)ethynyl)nicotinaldehyde **AdPyr-CHO**, 3.5 mM (1R)-1-(6-((adamantan-1-yl)ethynyl)pyridin-3-yl)-2-methylpropan-1-ol **AdPyr-OH** (*ee* > 99.9%) and 40 mM *i*Pr<sub>2</sub>Zn).

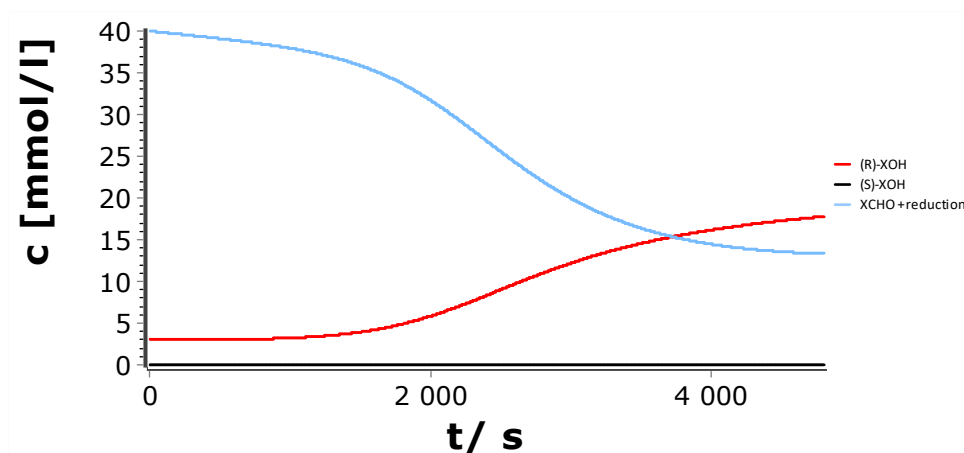

**Fig. 6.4.49:** Simulated concentration-time profile of the *Soai* reaction and the reduction side reaction (40 mM 6-((adamantan-1-yl)ethynyl)nicotinaldehyde **AdPyr-CHO**, 3.0 mM (1*R*)-1-(6-((adamantan-1-yl)ethynyl)pyridin-3-yl)-2-methylpropan-1-ol **AdPyr-OH** (*ee* > 99.9%) and 25 mM *iPr*<sub>2</sub>Zn).

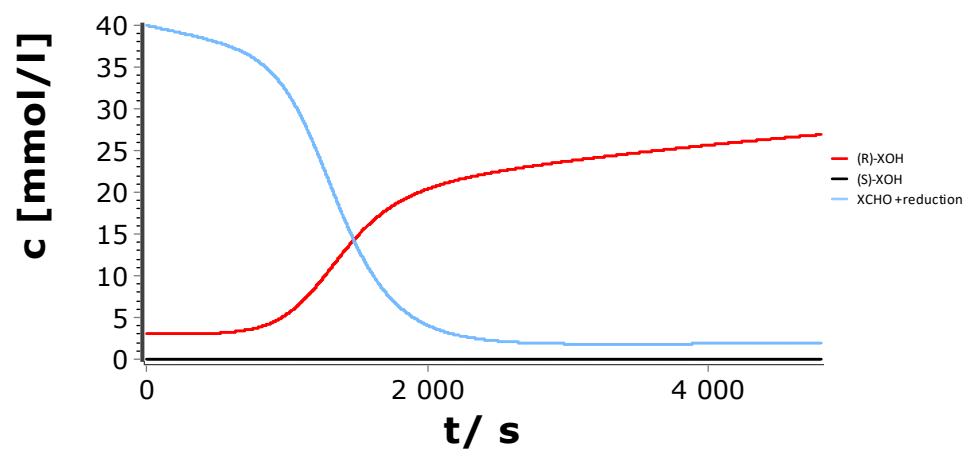

**Fig. 6.4.50:** Simulated concentration-time profile of the *Soai* reaction and the reduction side reaction (40 mM 6-((adamantan-1-yl)ethynyl)nicotinaldehyde **AdPyr-CHO**, 3.0 mM (1*R*)-1-(6-((adamantan-1-yl)ethynyl)pyridin-3-yl)-2-methylpropan-1-ol **AdPyr-OH** (*ee* > 99.9%) and 50 mM *iPr*<sub>2</sub>Zn).

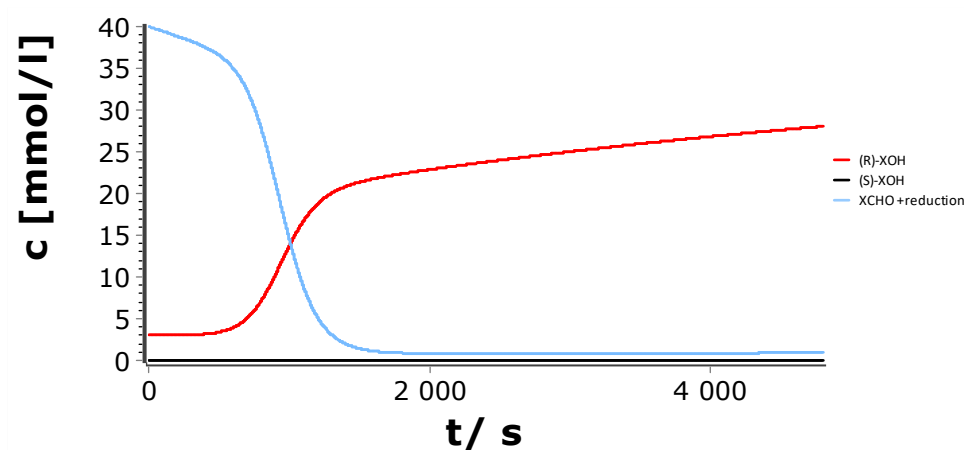

**Fig. 6.4.51:** Simulated concentration-time profile of the *Soai* reaction and the reduction side reaction (40 mM 6-((adamantan-1-yl)ethynyl)nicotinaldehyde **AdPyr-CHO**, 3.0 mM (1*R*)-1-(6-((adamantan-1-yl)ethynyl)pyridin-3-yl)-2-methylpropan-1-ol **AdPyr-OH** (*ee* > 99.9%) and 75 mM *iPr*<sub>2</sub>Zn).

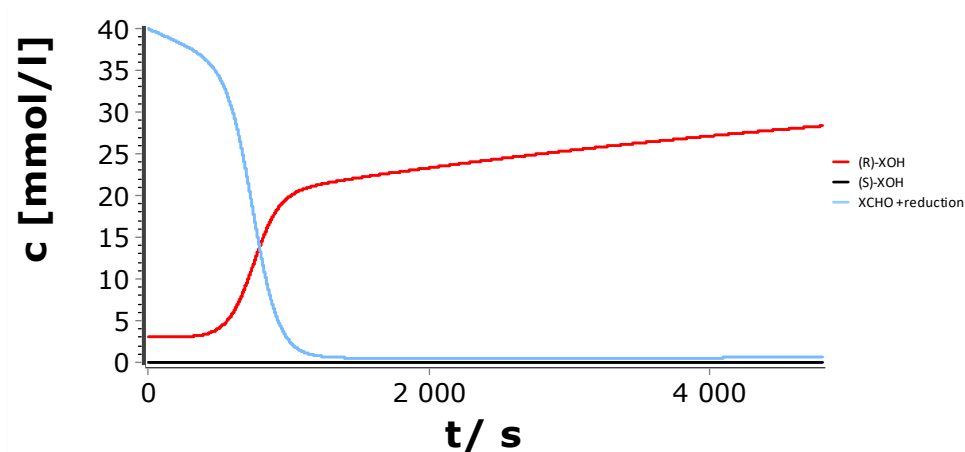

**Fig. 6.4.52:** Simulated concentration-time profile of the *Soai* reaction and the reduction side reaction (40 mM 6-((adamantan-1-yl)ethynyl)nicotinaldehyde **AdPyr-CHO**, 3.0 mM (1*R*)-1-(6-((adamantan-1-yl)ethynyl)pyridin-3-yl)-2-methylpropan-1-ol **AdPyr-OH** (*ee* > 99.9%) and 100 mM *i*Pr<sub>2</sub>Zn).

### 6.4.3 TMSPym-CHO/TMSPym-OH System

**Table 6.4.3:** Simulation Parameters for the TMSPym-CHO/TMSPym-OH System.

|    | TMSPymCHO<br>[mmol/L] | (R)-TMSPymOH<br>[mmol/L] | (S)-TMSPymOH<br>[mmol/L] | ee [%] | er   | ZnPr <sub>2</sub><br>[mmol/L] | t [s] |
|----|-----------------------|--------------------------|--------------------------|--------|------|-------------------------------|-------|
| 1  | 10                    | 1.49925                  | 0.00075                  | 99.9   | 1999 | 40                            | 2500  |
| 2  | 20                    | 1.49925                  | 0.00075                  | 99.9   | 1999 | 40                            | 2500  |
| 3  | 27                    | 1.49925                  | 0.00075                  | 99.9   | 1999 | 40                            | 2500  |
| 4  | 35                    | 1.49925                  | 0.00075                  | 99.9   | 1999 | 40                            | 2500  |
| 5  | 25                    | 0.749625                 | 0.000375                 | 99.9   | 1999 | 40                            | 2500  |
| 6  | 25                    | 1.49925                  | 0.00075                  | 99.9   | 1999 | 40                            | 2500  |
| 7  | 25                    | 5.1974                   | 0.0026                   | 99.9   | 1999 | 40                            | 2500  |
| 8  | 25                    | 1.49925                  | 0.00075                  | 99.9   | 1999 | 25                            | 2500  |
| 9  | 25                    | 1.49925                  | 0.00075                  | 99.9   | 1999 | 50                            | 2500  |
| 10 | 25                    | 1.49925                  | 0.00075                  | 99.9   | 1999 | 75                            | 2500  |
| 11 | 25                    | 1.49925                  | 0.00075                  | 99.9   | 1999 | 100                           | 2500  |

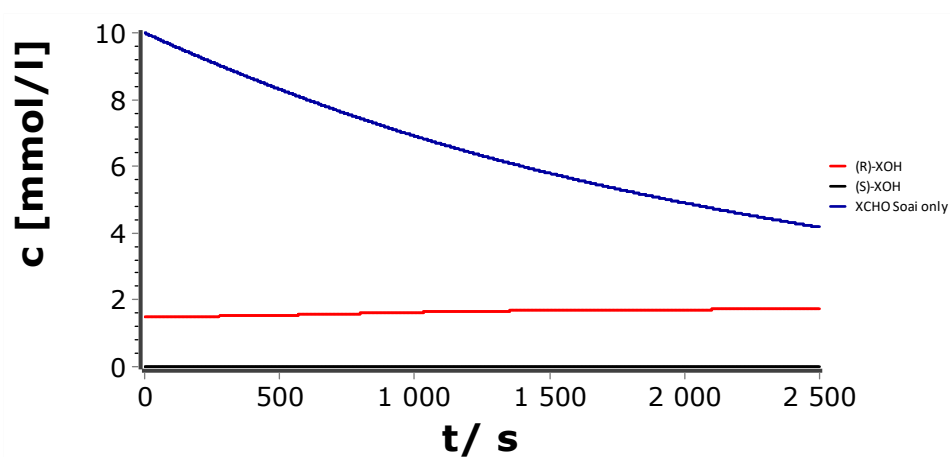

**Fig. 6.4.53:** Simulated concentration-time profile of the *Soai* reaction (10 mM 2-((trimethylsilyl)ethynyl)pyrimidine-5-carbaldehyde **TMSPym-CHO**, 1.5 mM (1*R*)-2-methyl-1-(2-((trimethylsilyl)ethynyl)pyrimidin-5-yl)propan-1-ol **TMSPym-OH** ( $ee > 99.9\%$ ) and 40 mM *i*Pr<sub>2</sub>Zn).

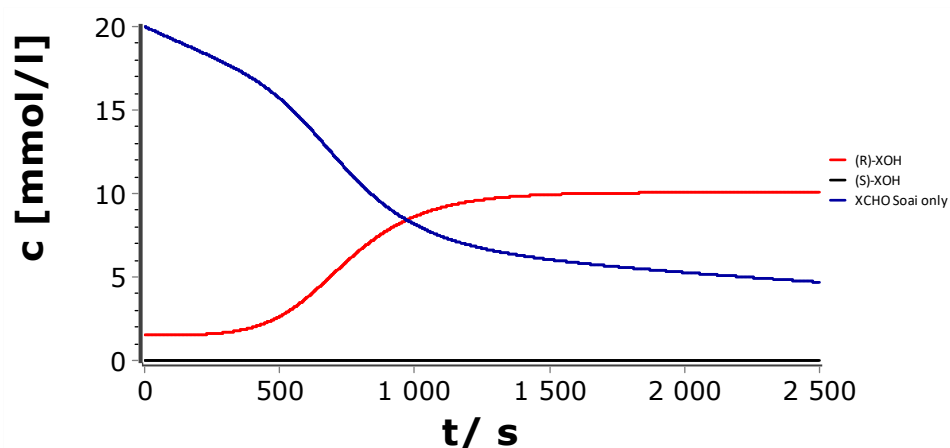

**Fig. 6.4.54:** Simulated concentration-time profile of the *Soai* reaction (20 mM 2-((trimethylsilyl)ethynyl)pyrimidine-5-carbaldehyde **TMSPym-CHO**, 1.5 mM (1*R*)-2-methyl-1-(2-((trimethylsilyl)ethynyl)pyrimidin-5-yl)propan-1-ol **TMSPym-OH** (*ee* > 99.9%) and 40 mM *i*Pr<sub>2</sub>Zn).

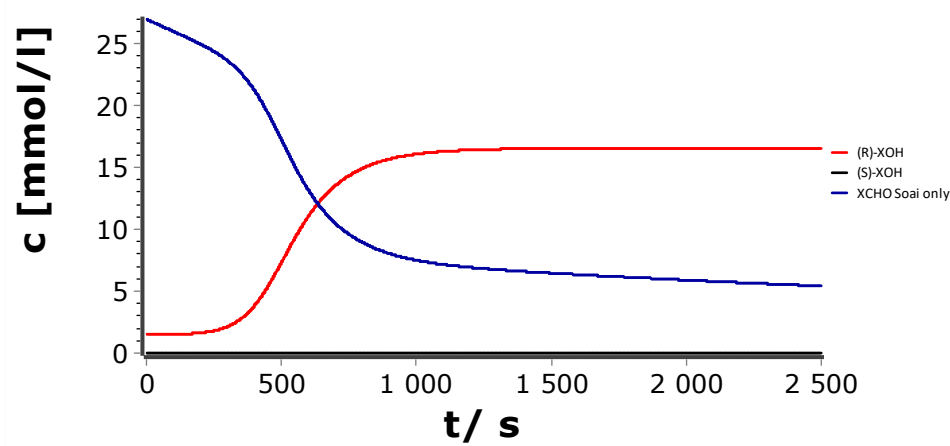

**Fig. 6.4.55:** Simulated concentration-time profile of the *Soai* reaction (27 mM 2-((trimethylsilyl)ethynyl)pyrimidine-5-carbaldehyde **TMSPym-CHO**, 1.5 mM (1*R*)-2-methyl-1-(2-((trimethylsilyl)ethynyl)pyrimidin-5-yl)propan-1-ol **TMSPym-OH** (*ee* > 99.9%) and 40 mM *i*Pr<sub>2</sub>Zn).

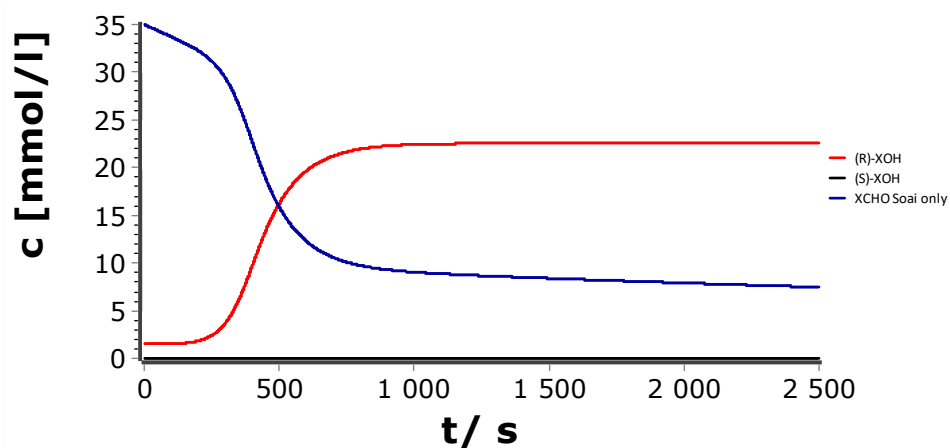

**Fig. 6.4.56:** Simulated concentration-time profile of the *Soai* reaction (35 mM 2-((trimethylsilyl)ethynyl)pyrimidine-5-carbaldehyde **TMSPym-CHO**, 1.5 mM (1*R*)-2-methyl-1-(2-((trimethylsilyl)ethynyl)pyrimidin-5-yl)propan-1-ol **TMSPym-OH** (*ee* > 99.9%) and 40 mM *i*Pr<sub>2</sub>Zn).

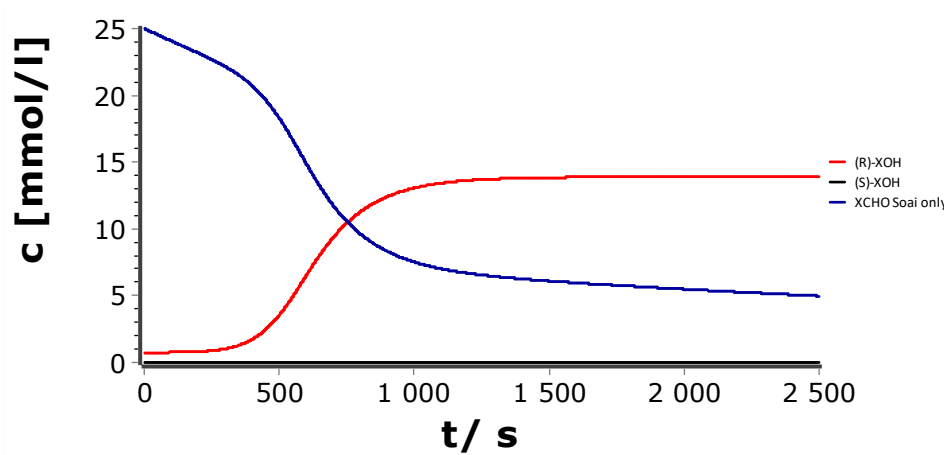

**Fig. 6.4.57:** Simulated concentration-time profile of the *Soai* reaction (25 mM 2-((trimethylsilyl)ethynyl)pyrimidine-5-carbaldehyde **TMSPym-CHO**, 0.75 mM (1*R*)-2-methyl-1-(2-((trimethylsilyl)ethynyl)pyrimidin-5-yl)propan-1-ol **TMSPym-OH** (*ee* > 99.9%) and 40 mM *i*Pr<sub>2</sub>Zn).

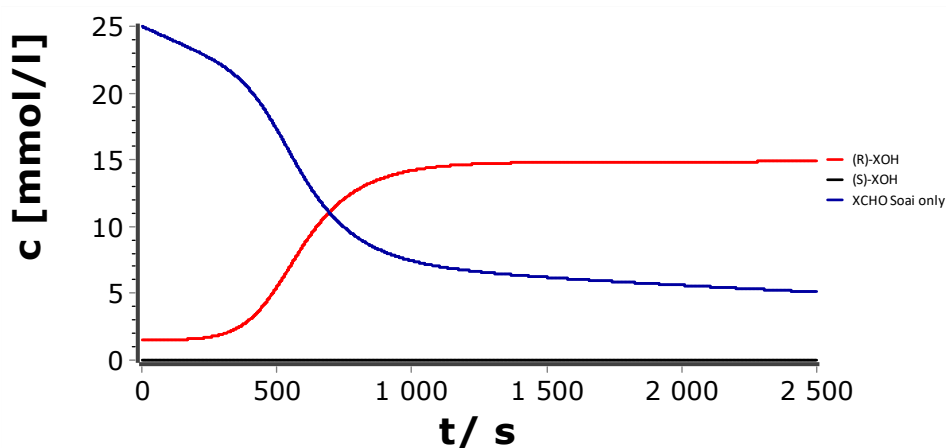

**Fig. 6.4.58:** Simulated concentration-time profile of the *Soai* reaction (25 mM 2-((trimethylsilyl)ethynyl)pyrimidine-5-carbaldehyde **TMSPym-CHO**, 1.5 mM (1*R*)-2-methyl-1-(2-((trimethylsilyl)ethynyl)pyrimidin-5-yl)propan-1-ol **TMSPym-OH** (*ee* > 99.9%) and 40 mM *i*Pr<sub>2</sub>Zn).

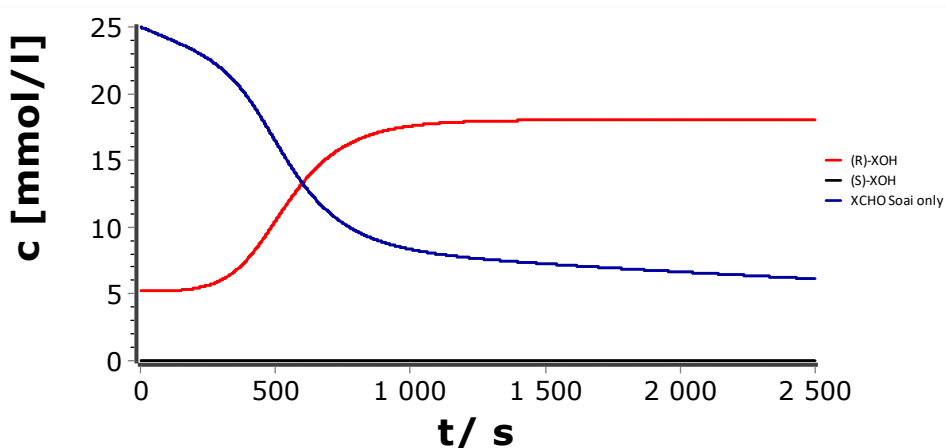

**Fig. 6.4.59:** Simulated concentration-time profile of the *Soai* reaction (25 mM 2-((trimethylsilyl)ethynyl)pyrimidine-5-carbaldehyde **TMSPym-CHO**, 5.2 mM (1*R*)-2-methyl-1-(2-((trimethylsilyl)ethynyl)pyrimidin-5-yl)propan-1-ol **TMSPym-OH** (*ee* > 99.9%) and 40 mM *i*Pr<sub>2</sub>Zn).



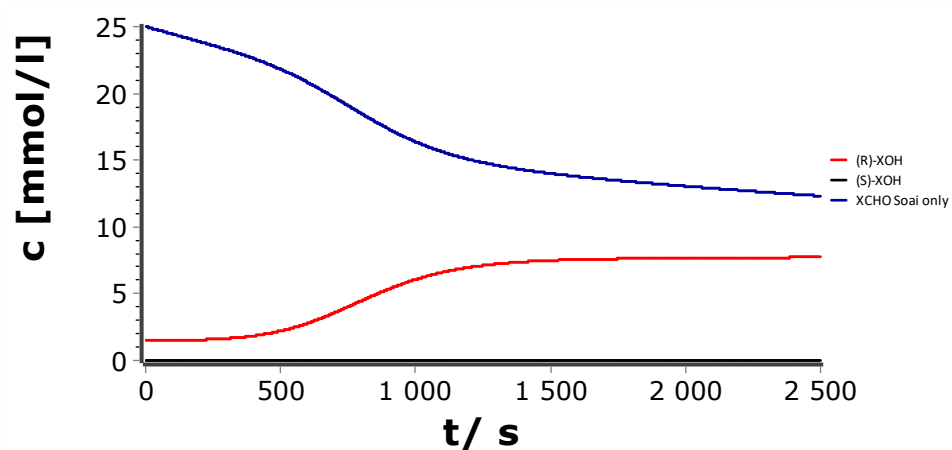

**Fig. 6.4.60:** Simulated concentration-time profile of the *Soai* reaction (25 mM 2-((trimethylsilyl)ethynyl)pyrimidine-5-carbaldehyde **TMSPym-CHO**, 1.5 mM (1*R*)-2-methyl-1-(2-((trimethylsilyl)ethynyl)pyrimidin-5-yl)propan-1-ol **TMSPym-OH** (*ee* > 99.9%) and 25 mM *iPr*<sub>2</sub>Zn).

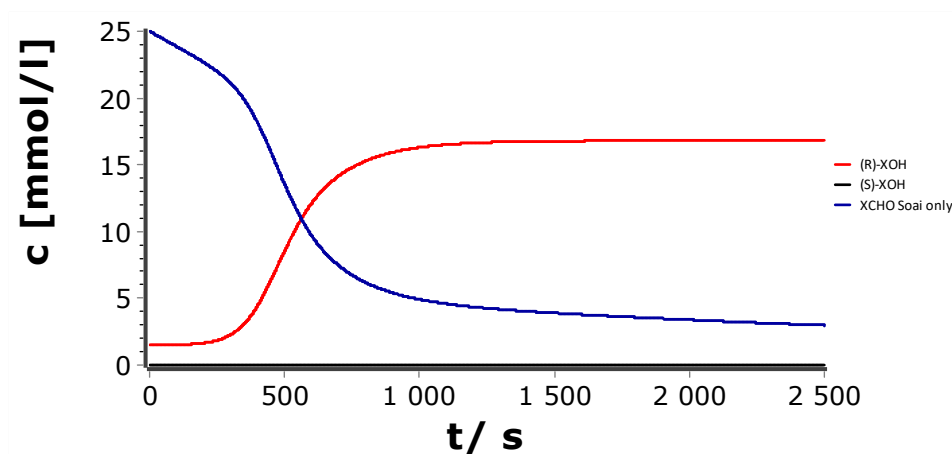

**Fig. 6.4.61:** Simulated concentration-time profile of the *Soai* reaction (25 mM 2-((trimethylsilyl)ethynyl)pyrimidine-5-carbaldehyde **TMSPym-CHO**, 1.5 mM (1*R*)-2-methyl-1-(2-((trimethylsilyl)ethynyl)pyrimidin-5-yl)propan-1-ol **TMSPym-OH** (*ee* > 99.9%) and 50 mM *iPr*<sub>2</sub>Zn).

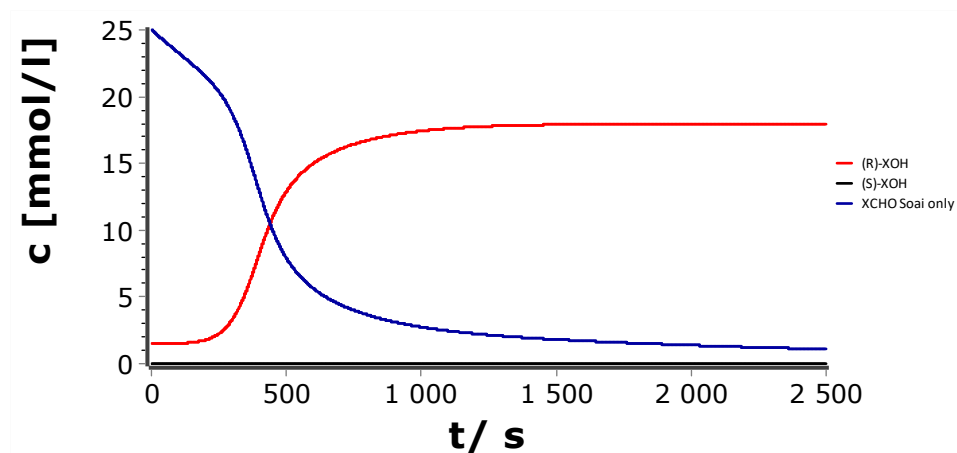

**Fig. 6.4.62:** Simulated concentration-time profile of the *Soai* reaction (25 mM 2-((trimethylsilyl)ethynyl)pyrimidine-5-carbaldehyde **TMSPym-CHO**, 1.5 mM (1*R*)-2-methyl-1-(2-((trimethylsilyl)ethynyl)pyrimidin-5-yl)propan-1-ol **TMSPym-OH** (*ee* > 99.9%) and 75 mM *iPr*<sub>2</sub>Zn).

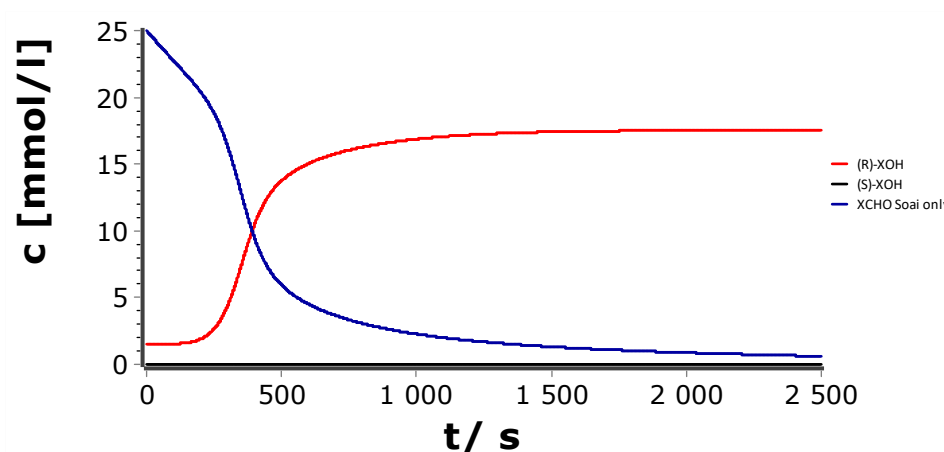

**Fig. 6.4.63:** Simulated concentration-time profile of the *Soai* reaction (25 mM 2-((trimethylsilyl)ethynyl)pyrimidine-5-carbaldehyde **TMSPym-CHO**, 1.5 mM (1*R*)-2-methyl-1-(2-((trimethylsilyl)ethynyl)pyrimidin-5-yl)propan-1-ol **TMSPym-OH** (*ee* > 99.9%) and 100 mM *i*Pr<sub>2</sub>Zn).

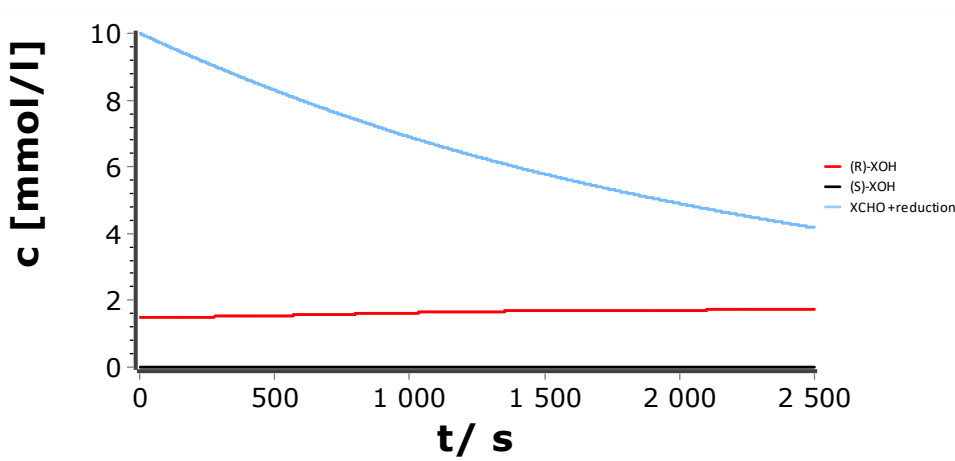

**Fig. 6.4.64:** Simulated concentration-time profile of the *Soai* reaction and the reduction side reaction (10 mM 2-((trimethylsilyl)ethynyl)pyrimidine-5-carbaldehyde **TMSPym-CHO**, 1.5 mM (1*R*)-2-methyl-1-(2-((trimethylsilyl)ethynyl)pyrimidin-5-yl)propan-1-ol **TMSPym-OH** (*ee* > 99.9%) and 40 mM *i*Pr<sub>2</sub>Zn).

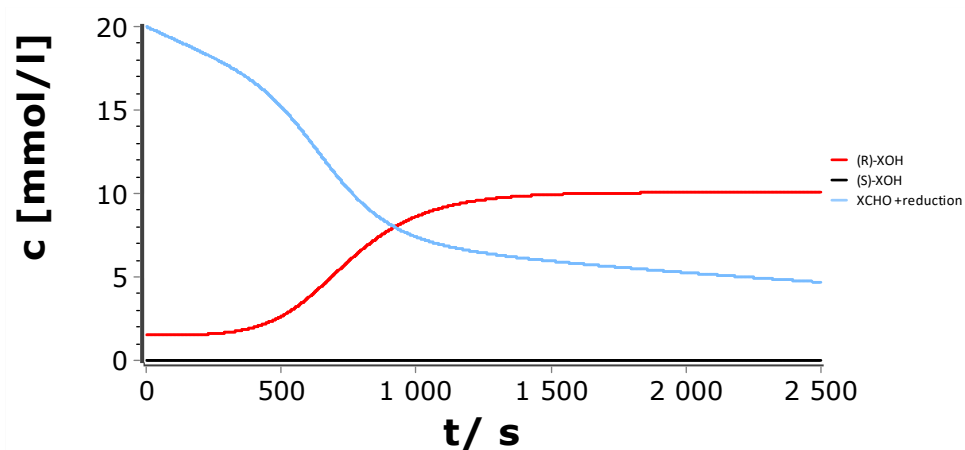

**Fig. 6.4.65:** Simulated concentration-time profile of the *Soai* reaction and the reduction side reaction (20 mM 2-((trimethylsilyl)ethynyl)pyrimidine-5-carbaldehyde **TMSPym-CHO**, 1.5 mM (1*R*)-2-methyl-1-(2-((trimethylsilyl)ethynyl)pyrimidin-5-yl)propan-1-ol **TMSPym-OH** (*ee* > 99.9%) and 40 mM *i*Pr<sub>2</sub>Zn).

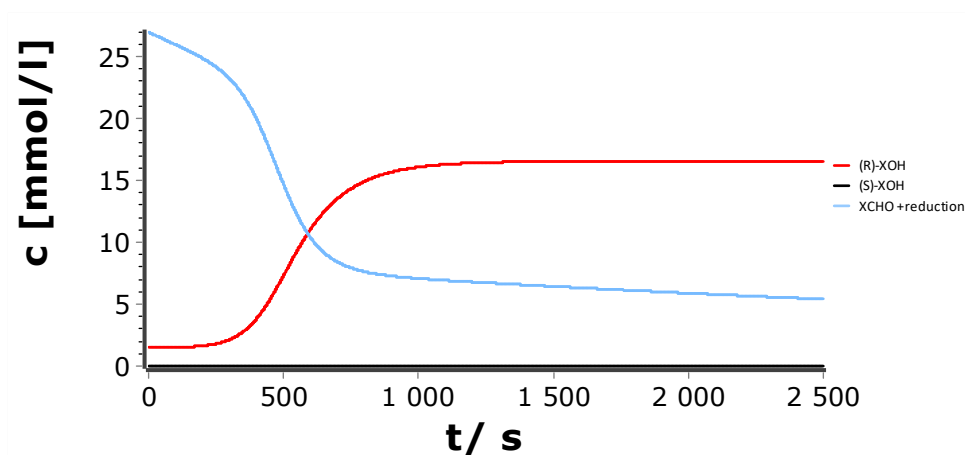

**Fig. 6.4.66:** Simulated concentration-time profile of the *Soai* reaction and the reduction side reaction (27 mM 2-((trimethylsilyl)ethynyl)pyrimidine-5-carbaldehyde **TMSPym-CHO**, 1.5 mM (1*R*)-2-methyl-1-(2-((trimethylsilyl)ethynyl)pyrimidin-5-yl)propan-1-ol **TMSPym-OH** (*ee* > 99.9%) and 40 mM *i*Pr<sub>2</sub>Zn).

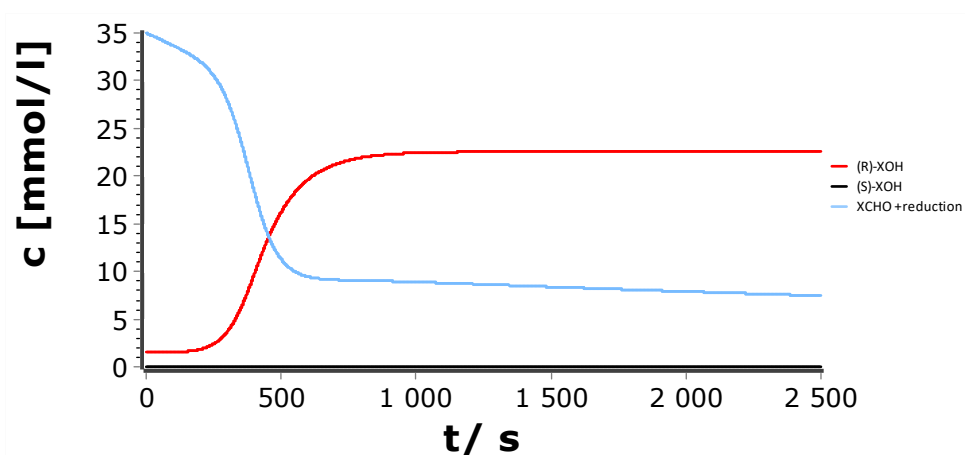

**Fig. 6.4.67:** Simulated concentration-time profile of the *Soai* reaction and the reduction side reaction (35 mM 2-((trimethylsilyl)ethynyl)pyrimidine-5-carbaldehyde **TMSPym-CHO**, 1.5 mM (1*R*)-2-methyl-1-(2-((trimethylsilyl)ethynyl)pyrimidin-5-yl)propan-1-ol **TMSPym-OH** (*ee* > 99.9%) and 40 mM *i*Pr<sub>2</sub>Zn).

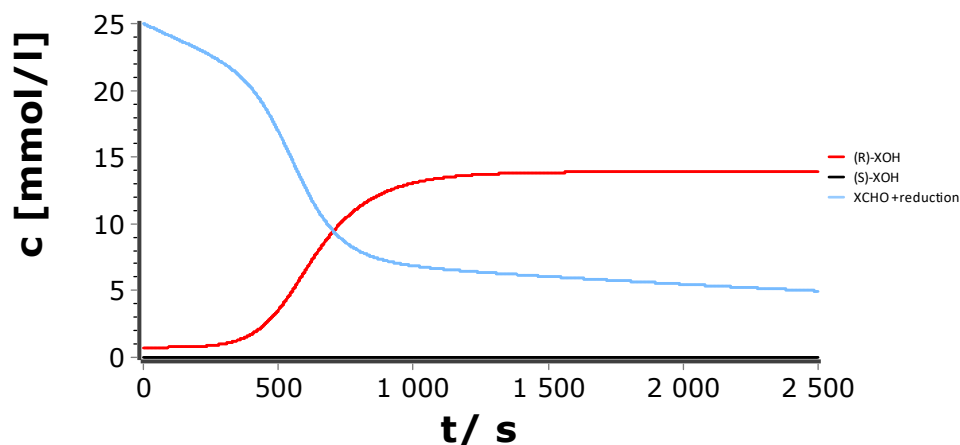

**Fig. 6.4.68:** Simulated concentration-time profile of the *Soai* reaction and the reduction side reaction (25 mM 2-((trimethylsilyl)ethynyl)pyrimidine-5-carbaldehyde **TMSPym-CHO**, 0.75 mM (1*R*)-2-methyl-1-(2-((trimethylsilyl)ethynyl)pyrimidin-5-yl)propan-1-ol **TMSPym-OH** (*ee* > 99.9%) and 40 mM *i*Pr<sub>2</sub>Zn).

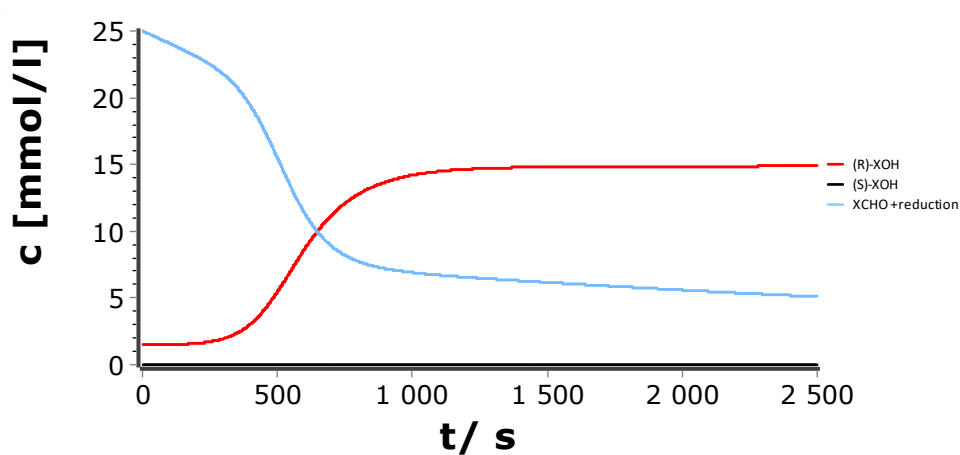

**Fig. 6.4.69:** Simulated concentration-time profile of the *Soai* reaction and the reduction side reaction (25 mM 2-((trimethylsilyl)ethynyl)pyrimidine-5-carbaldehyde **TMSPym-CHO**, 1.5 mM (1*R*)-2-methyl-1-(2-((trimethylsilyl)ethynyl)pyrimidin-5-yl)propan-1-ol **TMSPym-OH** (*ee* > 99.9%) and 40 mM *i*Pr<sub>2</sub>Zn).

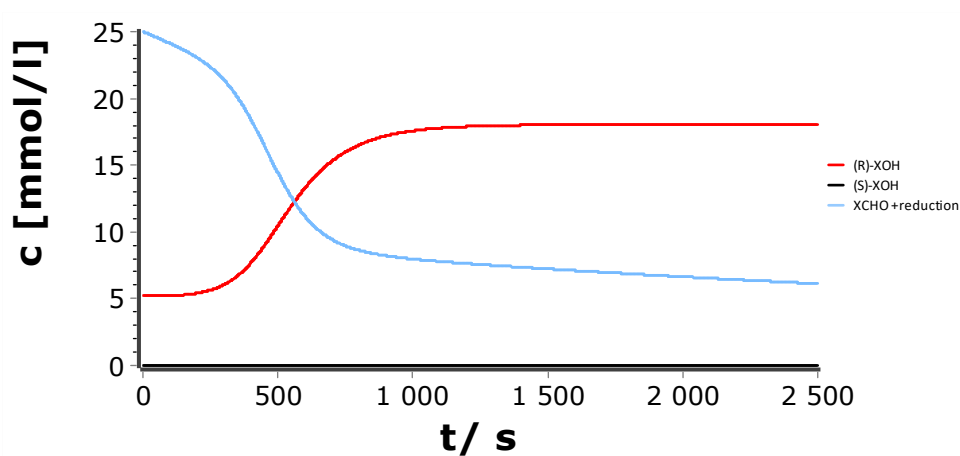

**Fig. 6.4.70:** Simulated concentration-time profile of the *Soai* reaction and the reduction side reaction (25 mM 2-((trimethylsilyl)ethynyl)pyrimidine-5-carbaldehyde **TMSPym-CHO**, 5.2 mM (1*R*)-2-methyl-1-(2-((trimethylsilyl)ethynyl)pyrimidin-5-yl)propan-1-ol **TMSPym-OH** (*ee* > 99.9%) and 40 mM *i*Pr<sub>2</sub>Zn).

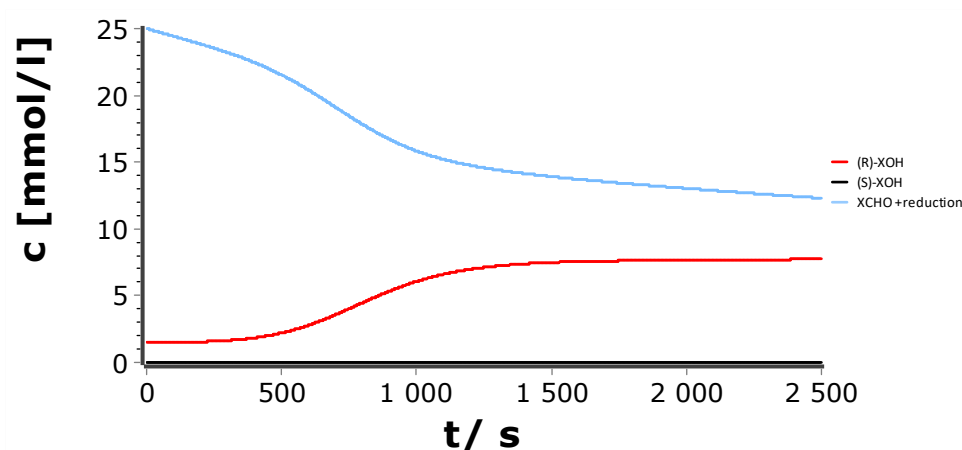

**Fig. 6.4.71:** Simulated concentration-time profile of the *Soai* reaction and the reduction side reaction (25 mM 2-((trimethylsilyl)ethynyl)pyrimidine-5-carbaldehyde **TMSPym-CHO**, 1.5 mM (1*R*)-2-methyl-1-(2-((trimethylsilyl)ethynyl)pyrimidin-5-yl)propan-1-ol **TMSPym-OH** (*ee* > 99.9%) and 25 mM *iPr*<sub>2</sub>Zn).

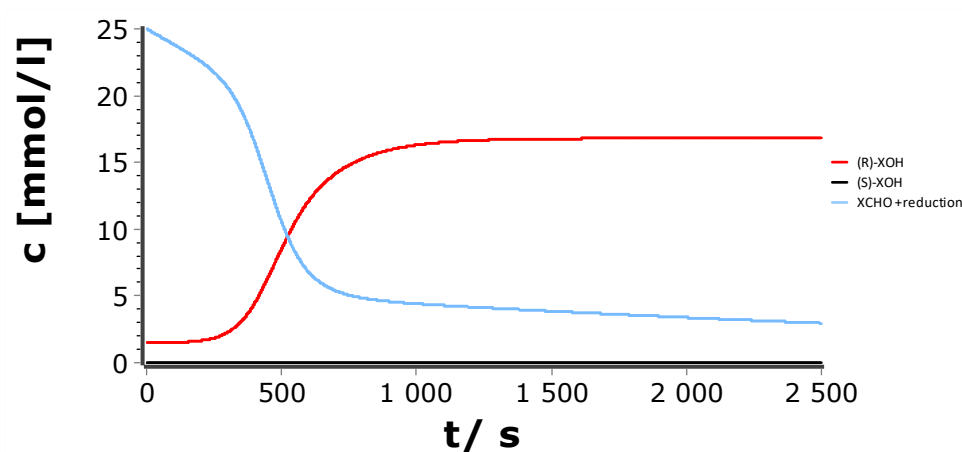

**Fig. 6.4.72:** Simulated concentration-time profile of the *Soai* reaction and the reduction side reaction (25 mM 2-((trimethylsilyl)ethynyl)pyrimidine-5-carbaldehyde **TMSPym-CHO**, 1.5 mM (1*R*)-2-methyl-1-(2-((trimethylsilyl)ethynyl)pyrimidin-5-yl)propan-1-ol **TMSPym-OH** (*ee* > 99.9%) and 50 mM *iPr*<sub>2</sub>Zn).

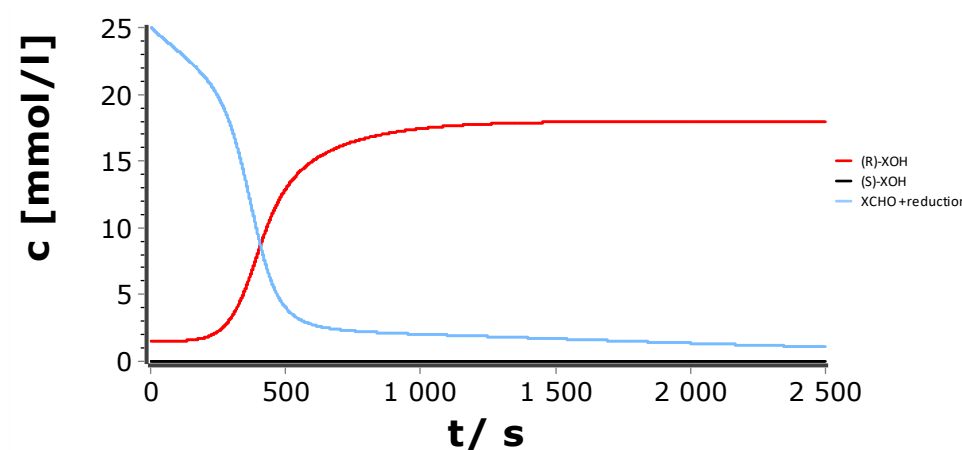

**Fig. 6.4.73:** Simulated concentration-time profile of the *Soai* reaction and the reduction side reaction (25 mM 2-((trimethylsilyl)ethynyl)pyrimidine-5-carbaldehyde **TMSPym-CHO**, 1.5 mM (1*R*)-2-methyl-1-(2-((trimethylsilyl)ethynyl)pyrimidin-5-yl)propan-1-ol **TMSPym-OH** (*ee* > 99.9%) and 75 mM *iPr*<sub>2</sub>Zn).

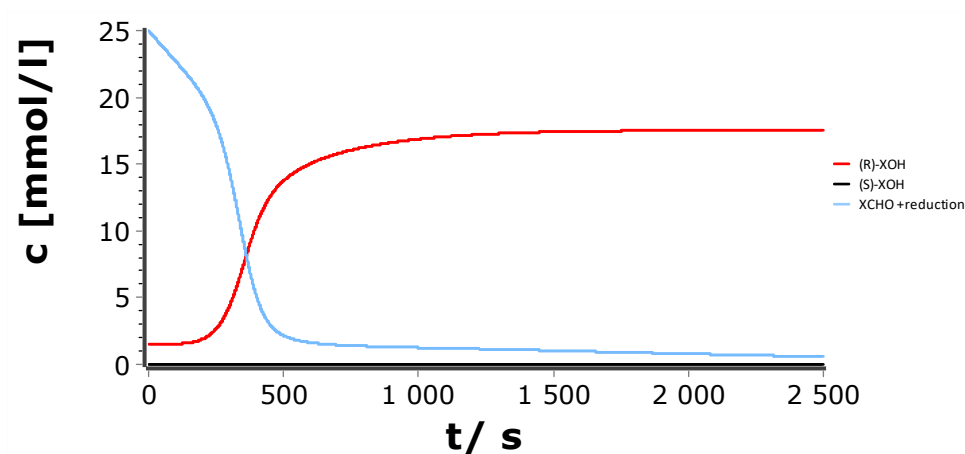

**Fig. 6.4.74:** Simulated concentration-time profile of the *Soai* reaction and the reduction side reaction (25 mM 2-((trimethylsilyl)ethynyl)pyrimidine-5-carbaldehyde **TMSPym-CHO**, 1.5 mM (1*R*)-2-methyl-1-(2-((trimethylsilyl)ethynyl)pyrimidin-5-yl)propan-1-ol **TMSPym-OH** (*ee* > 99.9%) and 100 mM *i*Pr<sub>2</sub>Zn).

#### 6.4.4 AdPym-CHO/AdPym-OH System

**Table 6.4.4:** Simulation Parameters for the AdPym-CHO/AdPym-OH System.

|    | AdPymCHO<br>[mmol/L] | (R)-AdPymOH<br>[mmol/L] | (S)-AdPymOH<br>[mmol/L] | ee [%] | er   | ZnPr <sub>2</sub><br>[mmol/L] | t [s] |
|----|----------------------|-------------------------|-------------------------|--------|------|-------------------------------|-------|
| 1  | 18                   | 1.49925                 | 0.00075                 | 99.9   | 1999 | 40                            | 4000  |
| 2  | 25                   | 1.49925                 | 0.00075                 | 99.9   | 1999 | 40                            | 4000  |
| 3  | 45                   | 1.49925                 | 0.00075                 | 99.9   | 1999 | 40                            | 4000  |
| 4  | 50                   | 1.49925                 | 0.00075                 | 99.9   | 1999 | 40                            | 4000  |
| 5  | 20                   | 0.9995                  | 0.0005                  | 99.9   | 1999 | 40                            | 4000  |
| 6  | 20                   | 1.999                   | 0.001                   | 99.9   | 1999 | 40                            | 4000  |
| 7  | 20                   | 3.1984                  | 0.0016                  | 99.9   | 1999 | 40                            | 4000  |
| 8  | 20                   | 1.49925                 | 0.00075                 | 99.9   | 1999 | 25                            | 4000  |
| 9  | 20                   | 1.49925                 | 0.00075                 | 99.9   | 1999 | 50                            | 4000  |
| 10 | 20                   | 1.49925                 | 0.00075                 | 99.9   | 1999 | 75                            | 4000  |
| 11 | 20                   | 1.49925                 | 0.00075                 | 99.9   | 1999 | 100                           | 4000  |

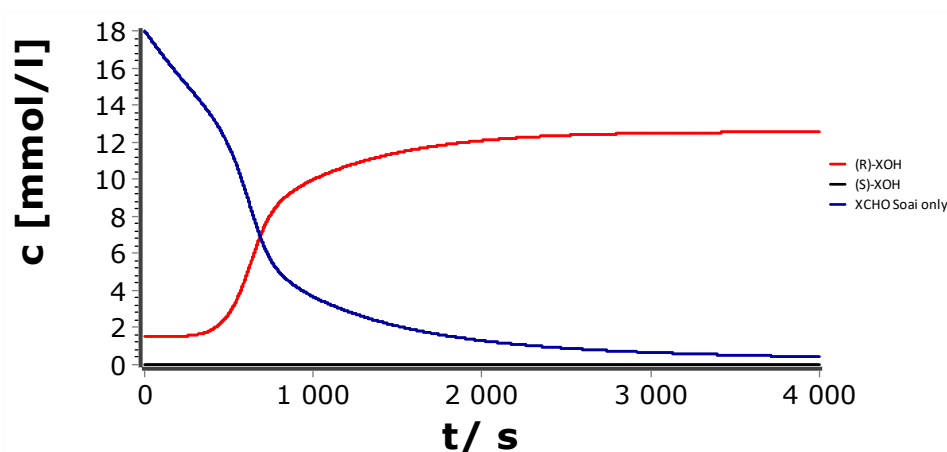

**Fig. 6.4.75:** Simulated concentration-time profile of the *Soai* reaction (18 mM 2-((adamantan-1-yl)ethynyl)pyrimidine-5-carbaldehyde **AdPym-CHO**, 1.5 mM (1*R*)-1-(2-((adamantan-1-yl)ethynyl)pyrimidin-5-yl)-2-methylpropan-1-ol **AdPym-OH** (*ee* > 99.9%) and 40 mM *i*Pr<sub>2</sub>Zn).

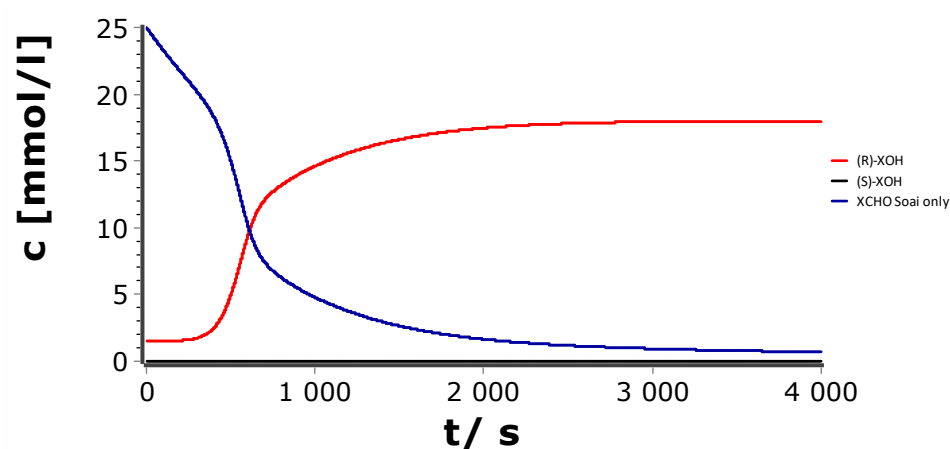

**Fig. 6.4.76:** Simulated concentration-time profile of the *Soai* reaction (25 mM 2-((adamantan-1-yl)ethynyl)pyrimidine-5-carbaldehyde **AdPym-CHO**, 1.5 mM (1*R*)-1-(2-((adamantan-1-yl)ethynyl)pyrimidin-5-yl)-2-methylpropan-1-ol **AdPym-OH** (*ee* > 99.9%) and 40 mM *i*Pr<sub>2</sub>Zn).

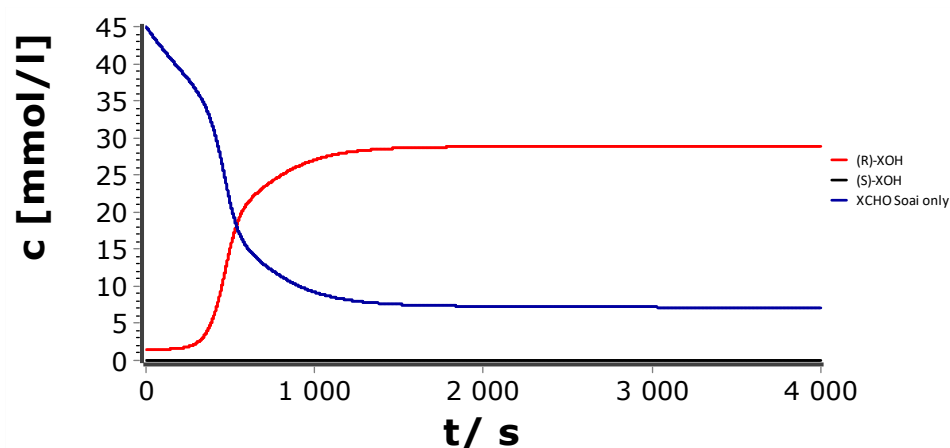

**Fig. 6.4.77:** Simulated concentration-time profile of the *Soai* reaction (45 mM 2-((adamantan-1-yl)ethynyl)pyrimidine-5-carbaldehyde **AdPym-CHO**, 1.5 mM (1*R*)-1-(2-((adamantan-1-yl)ethynyl)pyrimidin-5-yl)-2-methylpropan-1-ol **AdPym-OH** (*ee* > 99.9%) and 40 mM *i*Pr<sub>2</sub>Zn).

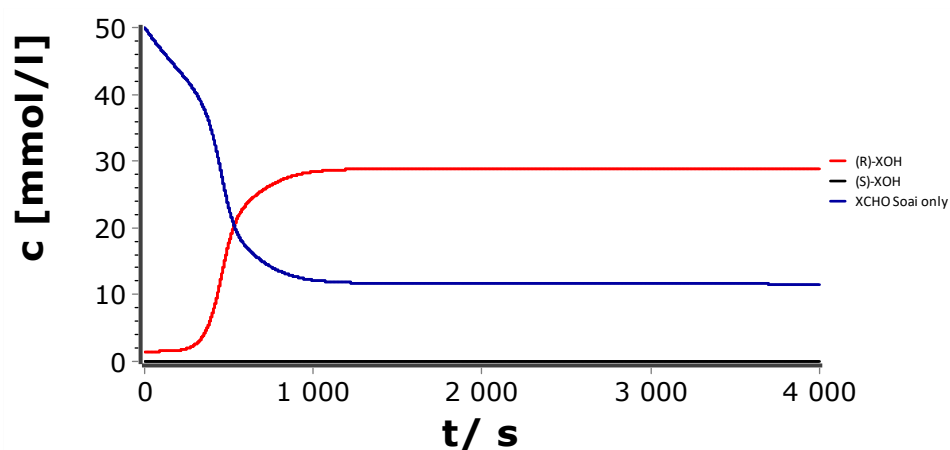

**Fig. 6.4.78:** Simulated concentration-time profile of the *Soai* reaction (50 mM 2-((adamantan-1-yl)ethynyl)pyrimidine-5-carbaldehyde **AdPym-CHO**, 1.5 mM (1*R*)-1-(2-((adamantan-1-yl)ethynyl)pyrimidin-5-yl)-2-methylpropan-1-ol **AdPym-OH** (*ee* > 99.9%) and 40 mM *i*Pr<sub>2</sub>Zn).

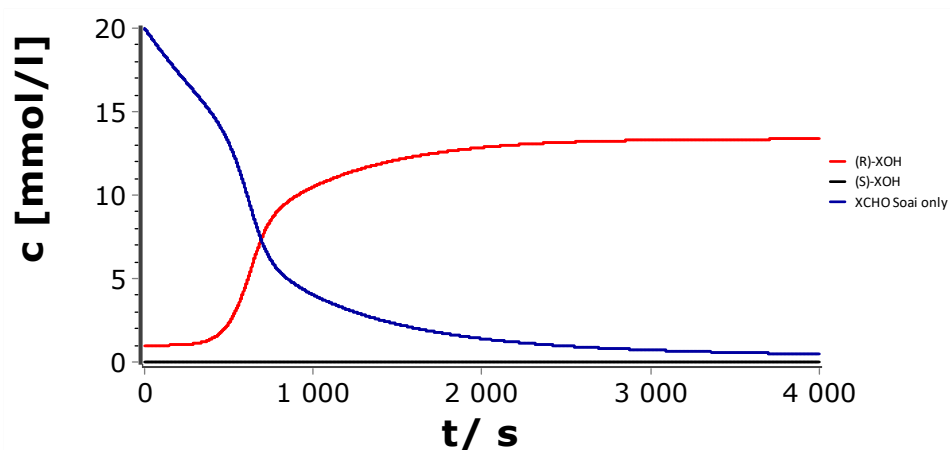

**Fig. 6.4.79:** Simulated concentration-time profile of the *Soai* reaction (20 mM 2-((adamantan-1-yl)ethynyl)pyrimidine-5-carbaldehyde **AdPym-CHO**, 1.0 mM (1*R*)-1-(2-((adamantan-1-yl)ethynyl)pyrimidin-5-yl)-2-methylpropan-1-ol **AdPym-OH** (*ee* > 99.9%) and 40 mM *i*Pr<sub>2</sub>Zn).



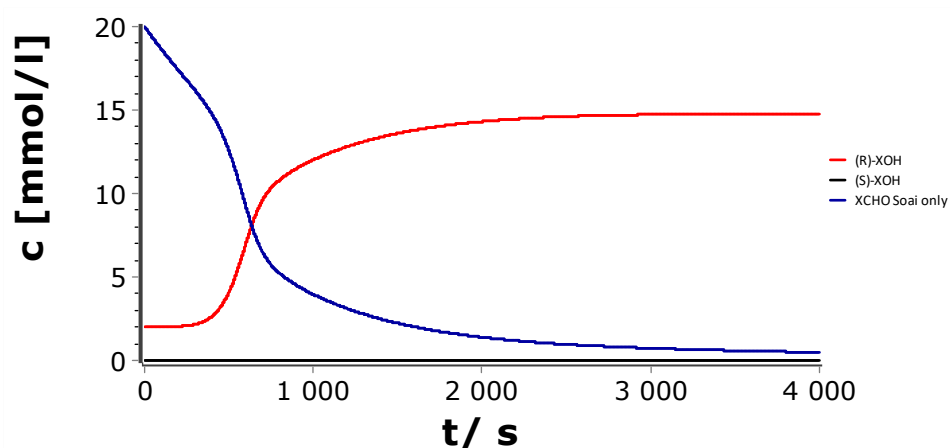

**Fig. 6.4.80:** Simulated concentration-time profile of the *Soai* reaction (20 mM 2-((adamantan-1-yl)ethynyl)pyrimidine-5-carbaldehyde **AdPym-CHO**, 2.0 mM (1*R*)-1-(2-((adamantan-1-yl)ethynyl)pyrimidin-5-yl)-2-methylpropan-1-ol **AdPym-OH** (*ee* > 99.9%) and 40 mM *i*Pr<sub>2</sub>Zn).

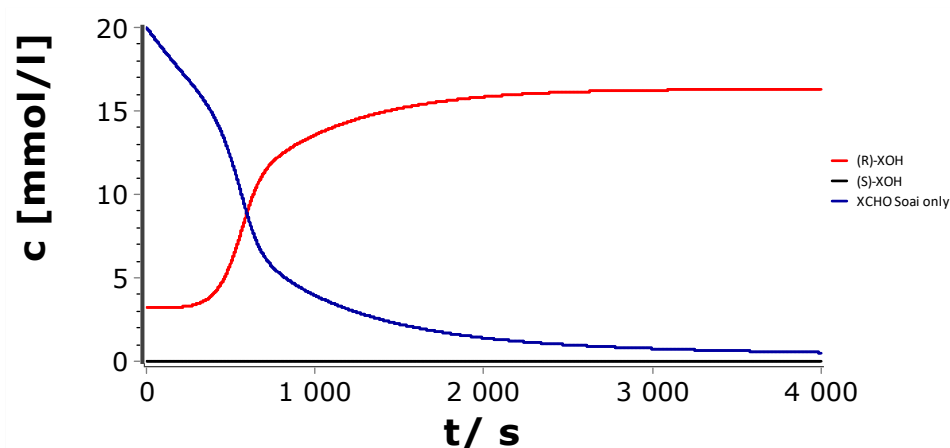

**Fig. 6.4.81:** Simulated concentration-time profile of the *Soai* reaction (20 mM 2-((adamantan-1-yl)ethynyl)pyrimidine-5-carbaldehyde **AdPym-CHO**, 3.2 mM (1*R*)-1-(2-((adamantan-1-yl)ethynyl)pyrimidin-5-yl)-2-methylpropan-1-ol **AdPym-OH** (*ee* > 99.9%) and 40 mM *i*Pr<sub>2</sub>Zn).

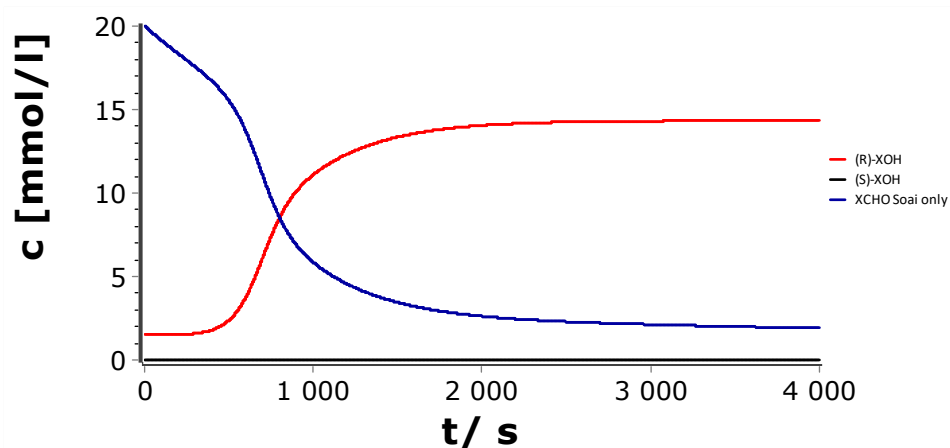

**Fig. 6.4.82:** Simulated concentration-time profile of the *Soai* reaction (20 mM 2-((adamantan-1-yl)ethynyl)pyrimidine-5-carbaldehyde **AdPym-CHO**, 1.5 mM (1*R*)-1-(2-((adamantan-1-yl)ethynyl)pyrimidin-5-yl)-2-methylpropan-1-ol **AdPym-OH** (*ee* > 99.9%) and 25 mM *i*Pr<sub>2</sub>Zn).

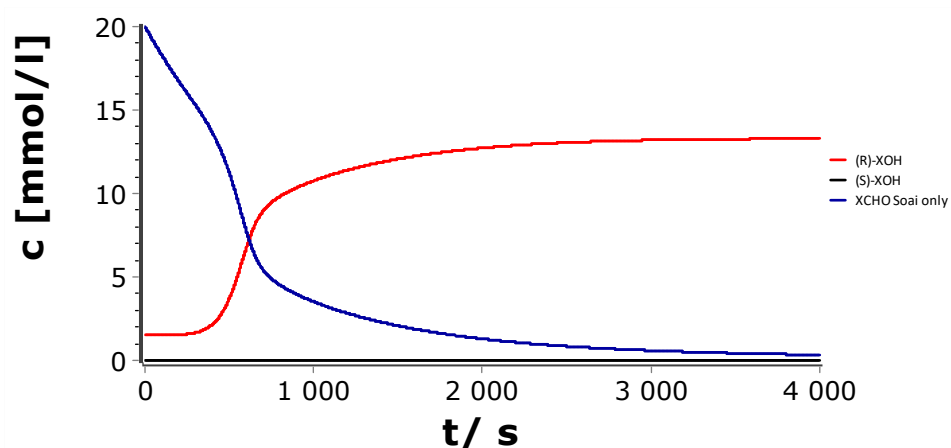

**Fig. 6.4.83:** Simulated concentration-time profile of the *Soai* reaction (20 mM 2-((adamantan-1-yl)ethynyl)pyrimidine-5-carbaldehyde **AdPym-CHO**, 1.5 mM (1*R*)-1-(2-((adamantan-1-yl)ethynyl)pyrimidin-5-yl)-2-methylpropan-1-ol **AdPym-OH** (*ee* > 99.9%) and 50 mM *i*Pr<sub>2</sub>Zn).

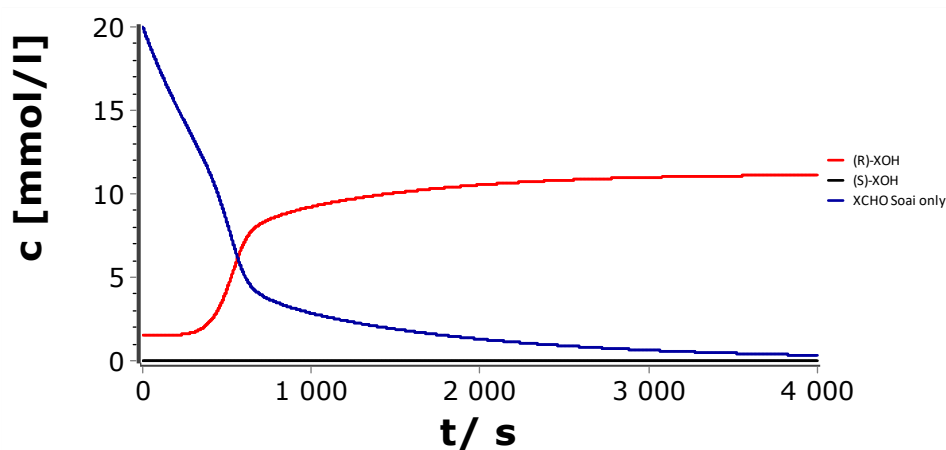

**Fig. 6.4.84:** Simulated concentration-time profile of the *Soai* reaction (20 mM 2-((adamantan-1-yl)ethynyl)pyrimidine-5-carbaldehyde **AdPym-CHO**, 1.5 mM (1*R*)-1-(2-((adamantan-1-yl)ethynyl)pyrimidin-5-yl)-2-methylpropan-1-ol **AdPym-OH** (*ee* > 99.9%) and 75 mM *i*Pr<sub>2</sub>Zn).

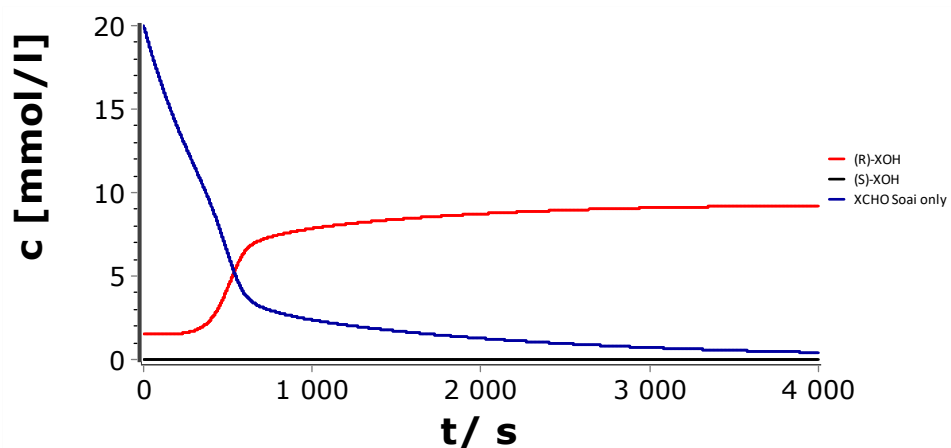

**Fig. 6.4.85:** Simulated concentration-time profile of the *Soai* reaction (20 mM 2-((adamantan-1-yl)ethynyl)pyrimidine-5-carbaldehyde **AdPym-CHO**, 1.5 mM (1*R*)-1-(2-((adamantan-1-yl)ethynyl)pyrimidin-5-yl)-2-methylpropan-1-ol **AdPym-OH** (*ee* > 99.9%) and 100 mM *i*Pr<sub>2</sub>Zn).

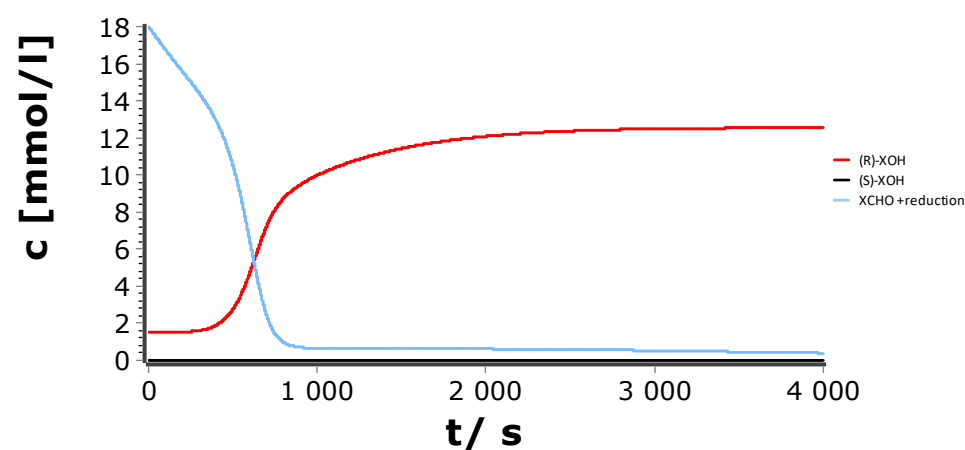

**Fig. 6.4.86:** Simulated concentration-time profile of the *Soai* reaction and the reduction side reaction (18 mM 2-((adamantan-1-yl)ethynyl)pyrimidine-5-carbaldehyde **AdPym-CHO**, 1.5 mM (1*R*)-1-(2-((adamantan-1-yl)ethynyl)pyrimidin-5-yl)-2-methylpropan-1-ol **AdPym-OH** (*ee* > 99.9%) and 40 mM *i*Pr<sub>2</sub>Zn).

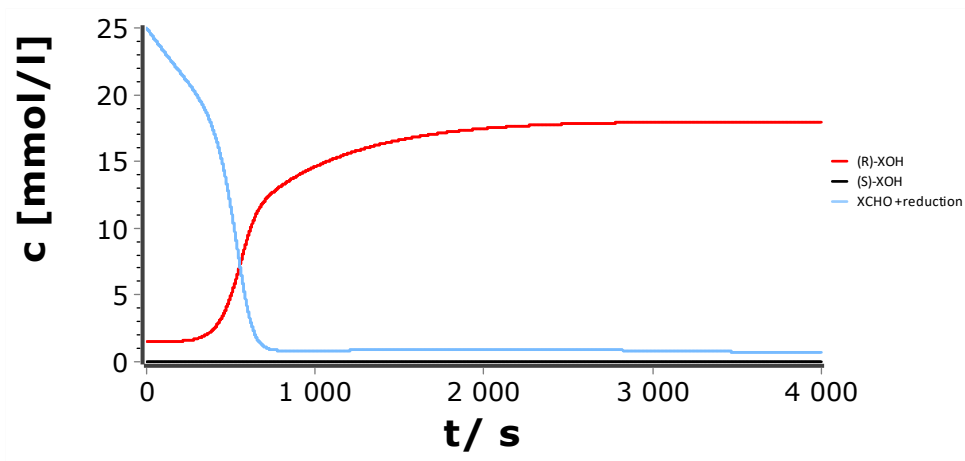

**Fig. 6.4.87:** Simulated concentration-time profile of the *Soai* reaction and the reduction side reaction (25 mM 2-((adamantan-1-yl)ethynyl)pyrimidine-5-carbaldehyde **AdPym-CHO**, 1.5 mM (1*R*)-1-(2-((adamantan-1-yl)ethynyl)pyrimidin-5-yl)-2-methylpropan-1-ol **AdPym-OH** (*ee* > 99.9%) and 40 mM *i*Pr<sub>2</sub>Zn).

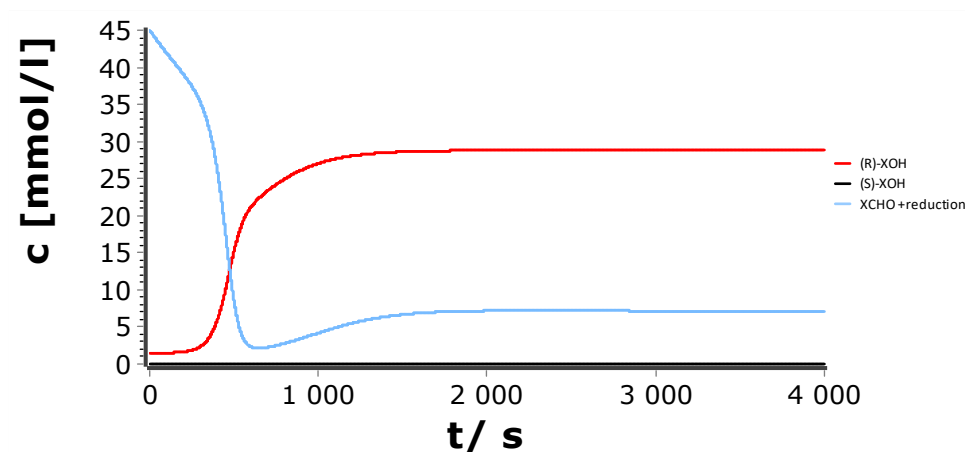

**Fig. 6.4.88:** Simulated concentration-time profile of the *Soai* reaction and the reduction side reaction (45 mM 2-((adamantan-1-yl)ethynyl)pyrimidine-5-carbaldehyde **AdPym-CHO**, 1.5 mM (1*R*)-1-(2-((adamantan-1-yl)ethynyl)pyrimidin-5-yl)-2-methylpropan-1-ol **AdPym-OH** (*ee* > 99.9%) and 40 mM *i*Pr<sub>2</sub>Zn).

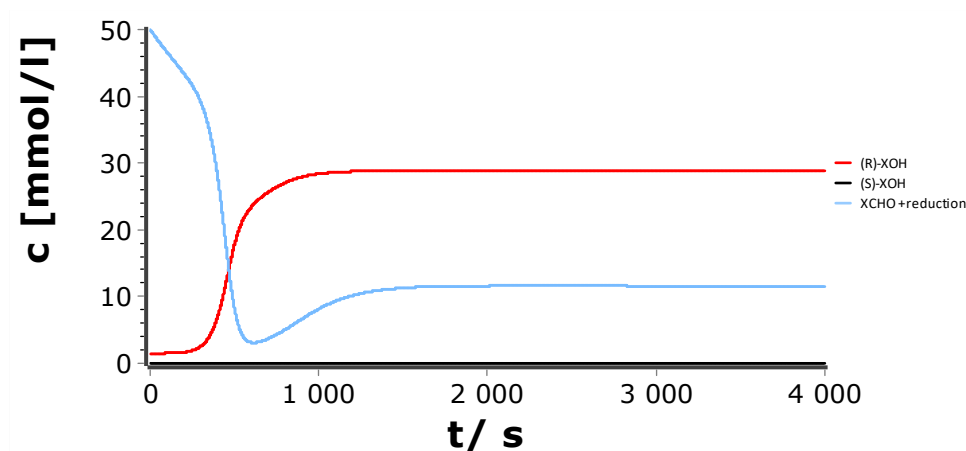

**Fig. 6.4.89:** Simulated concentration-time profile of the *Soai* reaction and the reduction side reaction (50 mM 2-((adamantan-1-yl)ethynyl)pyrimidine-5-carbaldehyde **AdPym-CHO**, 1.5 mM (1*R*)-1-(2-((adamantan-1-yl)ethynyl)pyrimidin-5-yl)-2-methylpropan-1-ol **AdPym-OH** (*ee* > 99.9%) and 40 mM *i*Pr<sub>2</sub>Zn).

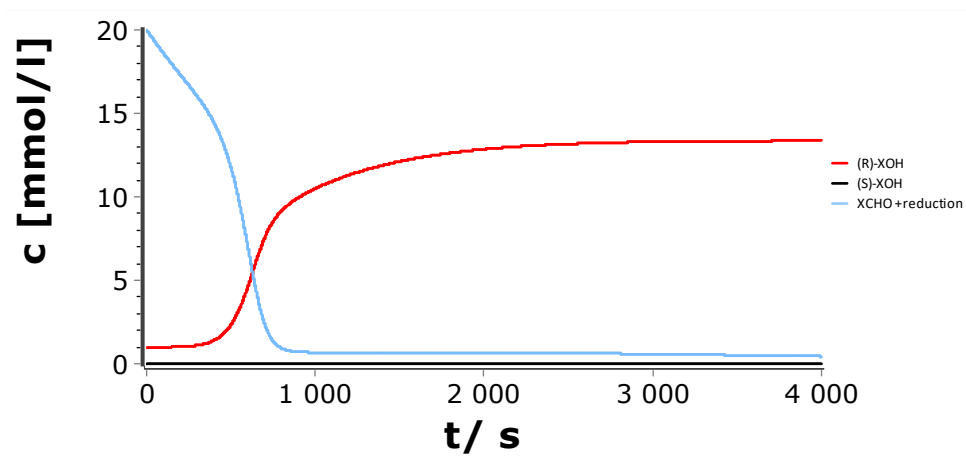

**Fig. 6.4.90:** Simulated concentration-time profile of the *Soai* reaction and the reduction side reaction (20 mM 2-((adamantan-1-yl)ethynyl)pyrimidine-5-carbaldehyde **AdPym-CHO**, 1.0 mM (1*R*)-1-(2-((adamantan-1-yl)ethynyl)pyrimidin-5-yl)-2-methylpropan-1-ol **AdPym-OH** (*ee* > 99.9%) and 40 mM *i*Pr<sub>2</sub>Zn).

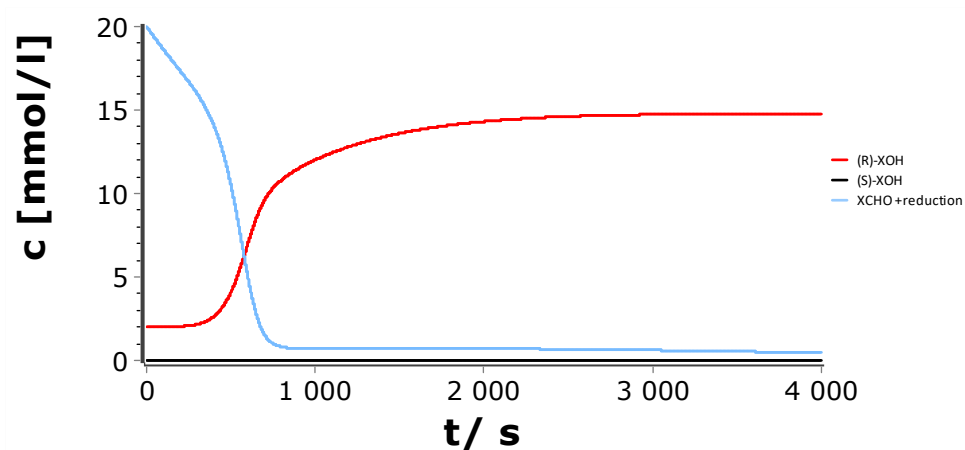

**Fig. 6.4.91:** Simulated concentration-time profile of the *Soai* reaction and the reduction side reaction (20 mM 2-((adamantan-1-yl)ethynyl)pyrimidine-5-carbaldehyde **AdPym-CHO**, 2.0 mM (1*R*)-1-(2-((adamantan-1-yl)ethynyl)pyrimidin-5-yl)-2-methylpropan-1-ol **AdPym-OH** (*ee* > 99.9%) and 40 mM *i*Pr<sub>2</sub>Zn).

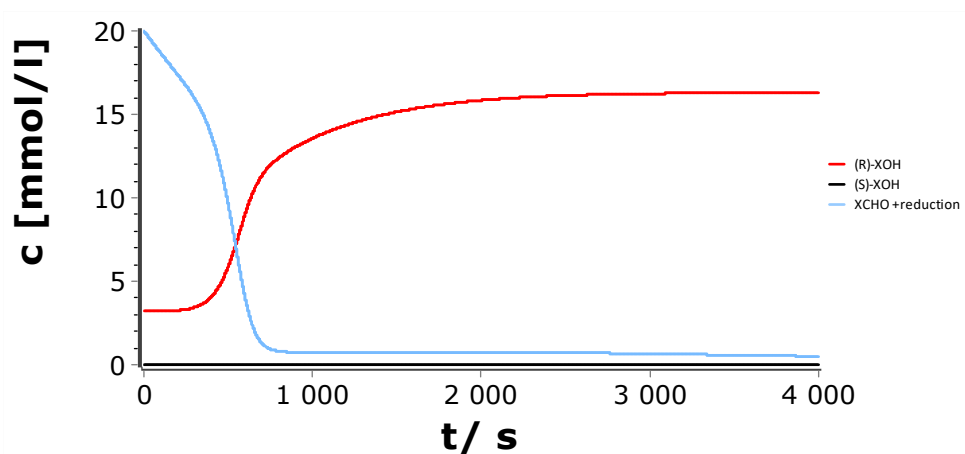

**Fig. 6.4.92:** Simulated concentration-time profile of the *Soai* reaction and the reduction side reaction (20 mM 2-((adamantan-1-yl)ethynyl)pyrimidine-5-carbaldehyde **AdPym-CHO**, 3.2 mM (1*R*)-1-(2-((adamantan-1-yl)ethynyl)pyrimidin-5-yl)-2-methylpropan-1-ol **AdPym-OH** (*ee* > 99.9%) and 40 mM *i*Pr<sub>2</sub>Zn).

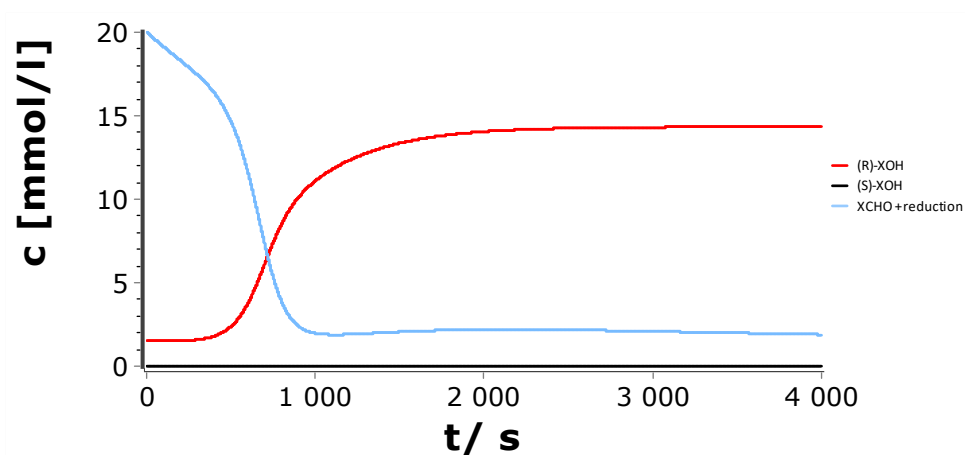

**Fig. 6.4.93:** Simulated concentration-time profile of the *Soai* reaction and the reduction side reaction (20 mM 2-((adamantan-1-yl)ethynyl)pyrimidine-5-carbaldehyde **AdPym-CHO**, 1.5 mM (1*R*)-1-(2-

((adamantan-1-yl)ethynyl)pyrimidin-5-yl)-2-methylpropan-1-ol **AdPym-OH** (*ee* > 99.9%) and 25 mM *i*Pr<sub>2</sub>Zn).

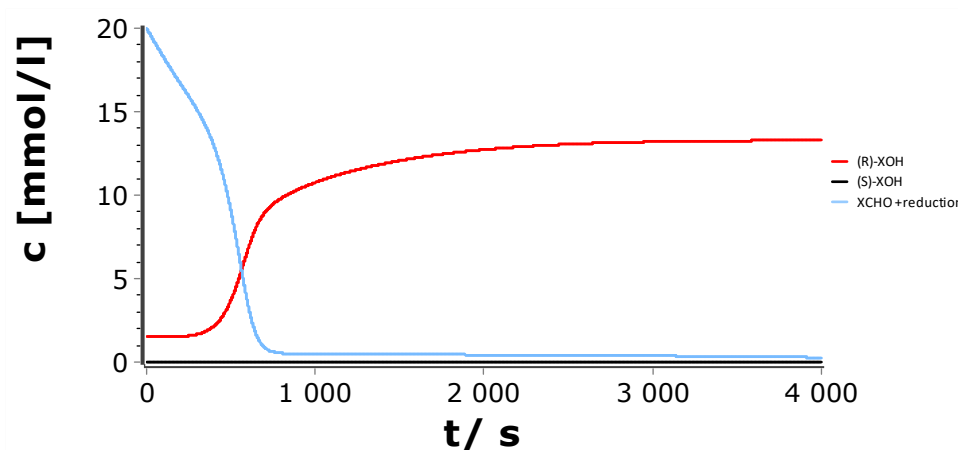

**Fig. 6.4.94:** Simulated concentration-time profile of the *Soai* reaction and the reduction side reaction (20 mM 2-((adamantan-1-yl)ethynyl)pyrimidine-5-carbaldehyde **AdPym-CHO**, 1.5 mM (1*R*)-1-(2-((adamantan-1-yl)ethynyl)pyrimidin-5-yl)-2-methylpropan-1-ol **AdPym-OH** (*ee* > 99.9%) and 50 mM *i*Pr<sub>2</sub>Zn).

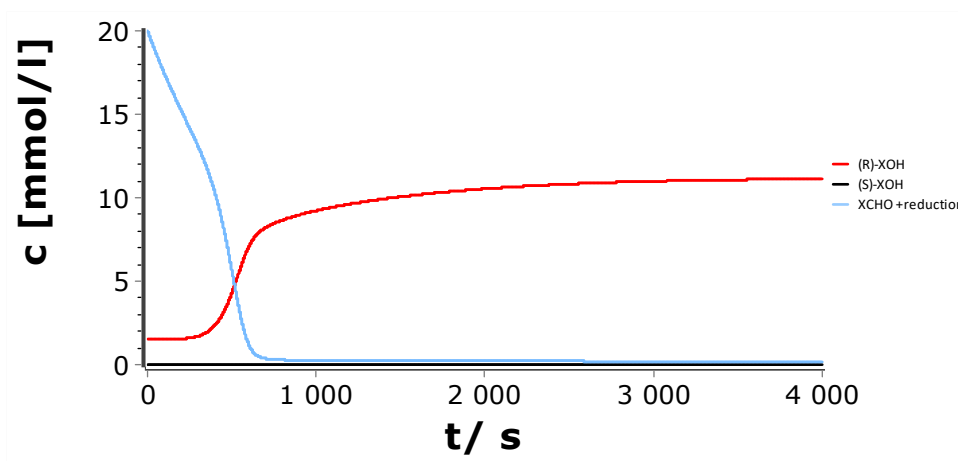

**Fig. 6.4.95:** Simulated concentration-time profile of the *Soai* reaction and the reduction side reaction (20 mM 2-((adamantan-1-yl)ethynyl)pyrimidine-5-carbaldehyde **AdPym-CHO**, 1.5 mM (1*R*)-1-(2-((adamantan-1-yl)ethynyl)pyrimidin-5-yl)-2-methylpropan-1-ol **AdPym-OH** (*ee* > 99.9%) and 75 mM *i*Pr<sub>2</sub>Zn).

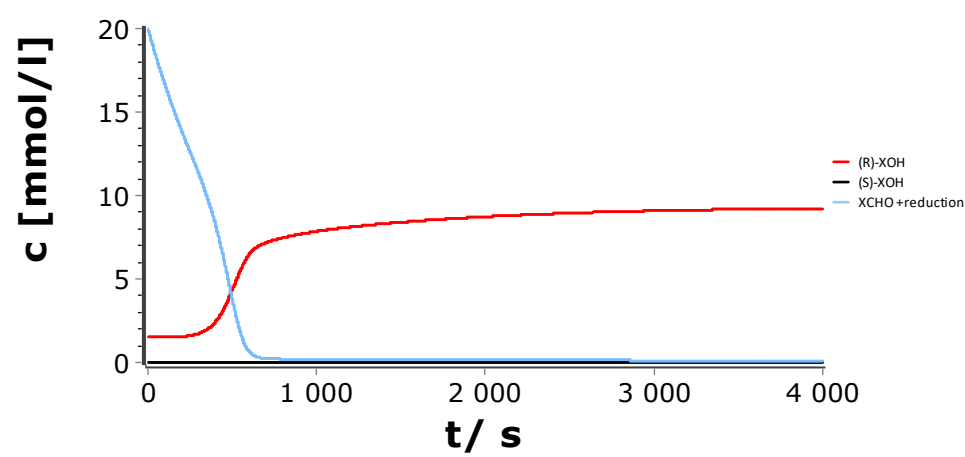

**Fig. 6.4.96:** Simulated concentration-time profile of the *Soai* reaction and the reduction side reaction (20 mM 2-((adamantan-1-yl)ethynyl)pyrimidine-5-carbaldehyde **AdPym-CHO**, 1.5 mM (1*R*)-1-(2-((adamantan-1-yl)ethynyl)pyrimidin-5-yl)-2-methylpropan-1-ol **AdPym-OH** (*ee* > 99.9%) and 100 mM *i*Pr<sub>2</sub>Zn).

## 7 NMR Spectra

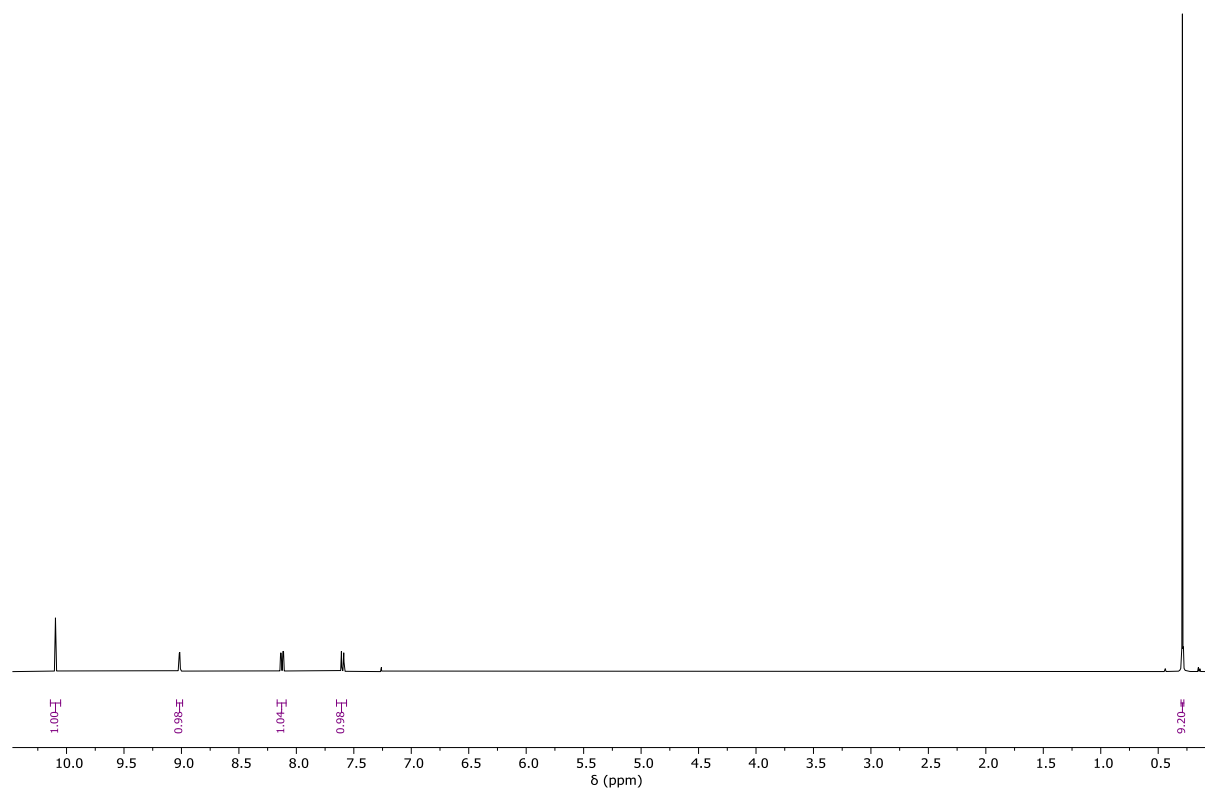

**Fig. 7.1:**  $^1\text{H}$ -NMR ( $\text{CDCl}_3$ , 400 MHz) of 6-((trimethylsilyl)ethynyl)nicotinaldehyde (TMSPyr-CHO).

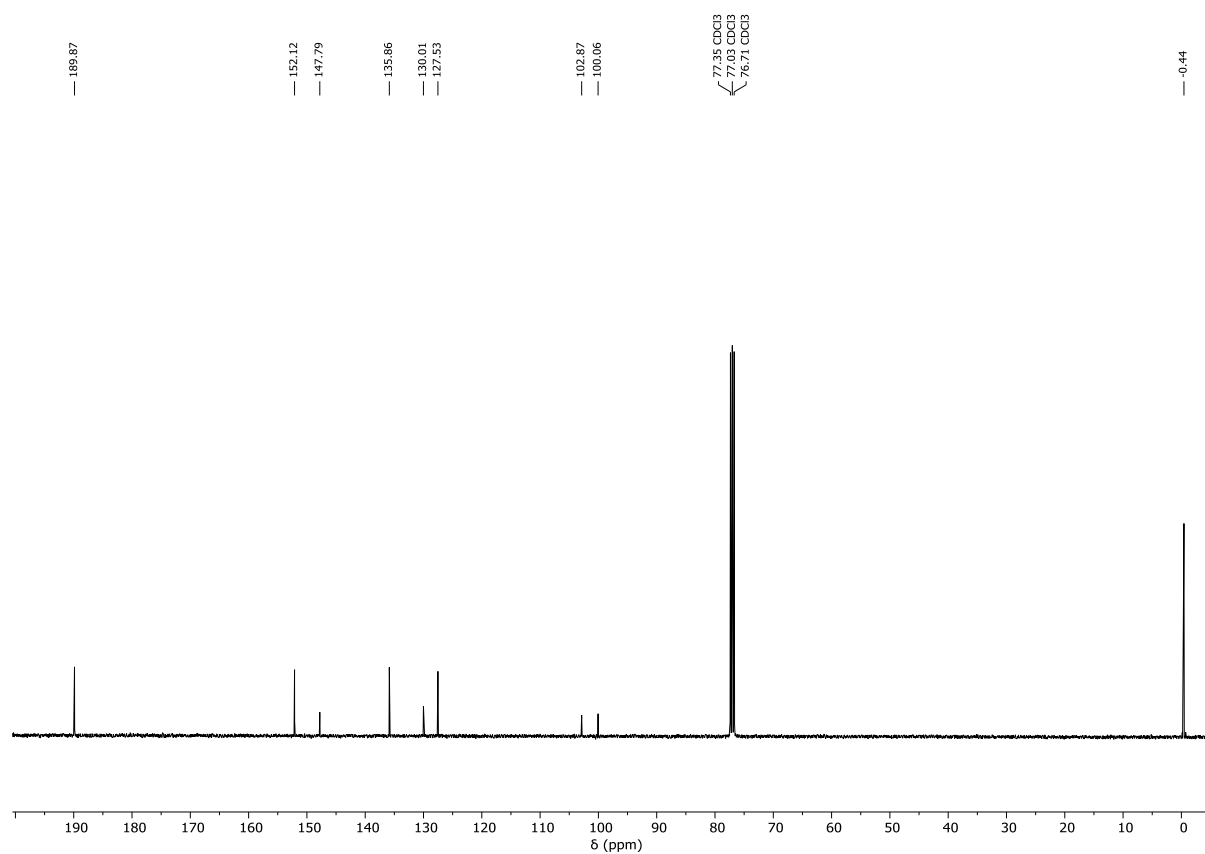

**Fig. 7.2:**  $^{13}\text{C}$ -NMR ( $\text{CDCl}_3$ , 400 MHz) of 6-((trimethylsilyl)ethynyl)nicotinaldehyde (TMSPyr-CHO).



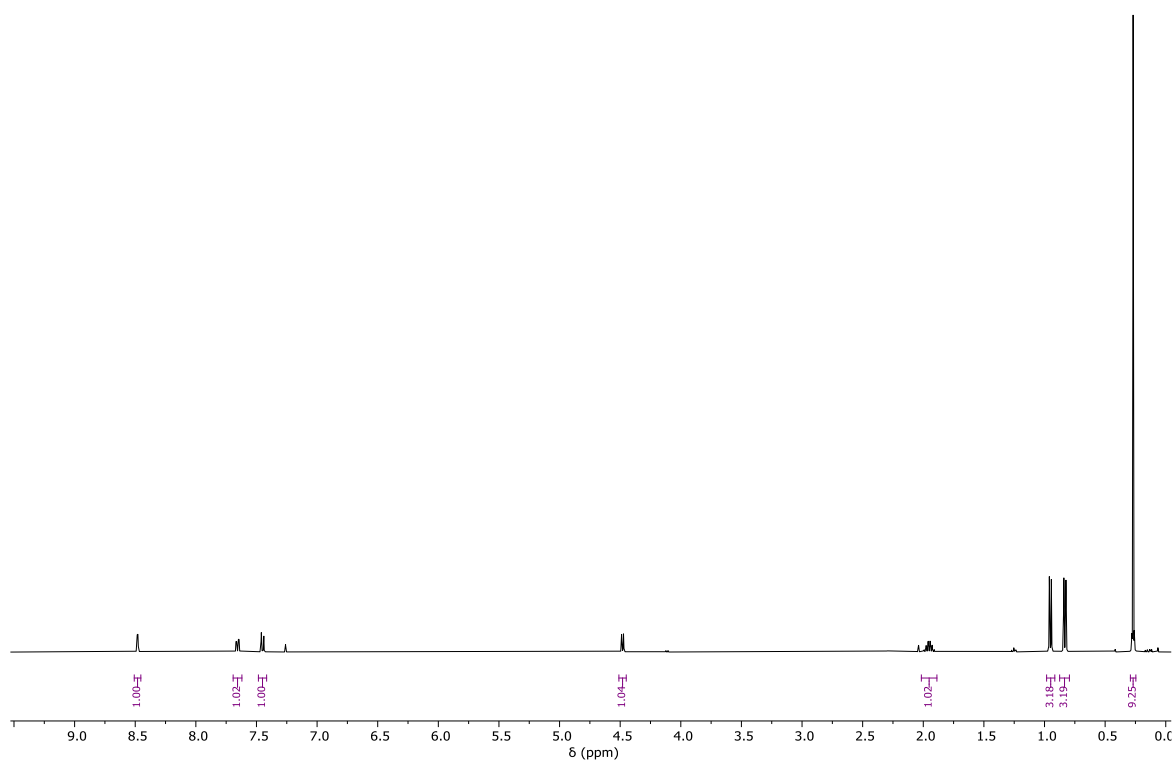

**Fig. 7.3:**  $^1\text{H}$ -NMR ( $\text{CDCl}_3$ , 400 MHz) of 2-Methyl-(6-((trimethylsilyl)ethynyl)pyridine-3-yl)propanol (TMSPyr-OH).

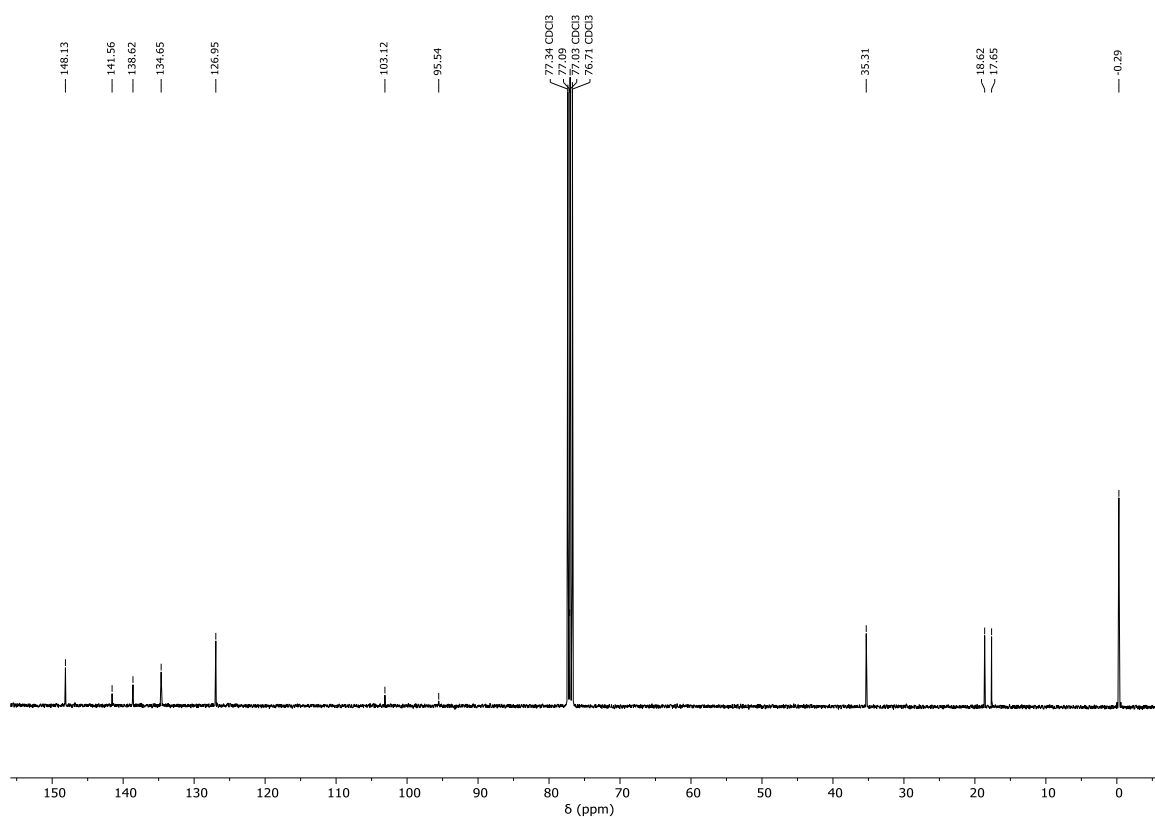

**Fig. 7.4:**  $^{13}\text{C}$ -NMR ( $\text{CDCl}_3$ , 400 MHz) of 2-Methyl-(6-((trimethylsilyl)ethynyl)pyridine-3-yl)propanol (TMSPyr-OH).

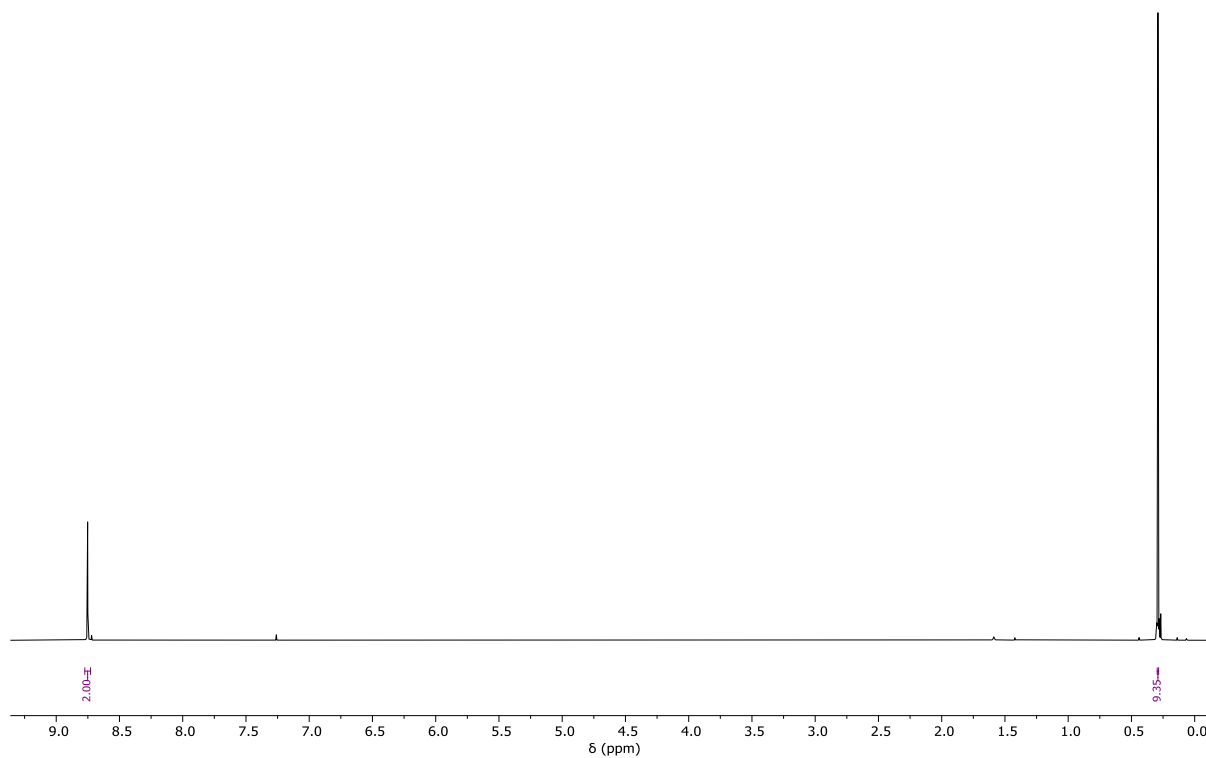

**Fig. 7.5:**  $^1\text{H-NMR}$  ( $\text{CDCl}_3$ , 400 MHz) of 5-Bromo-2-((trimethylsilyl)ethynyl) pyrimidine (TMSPym-Br).

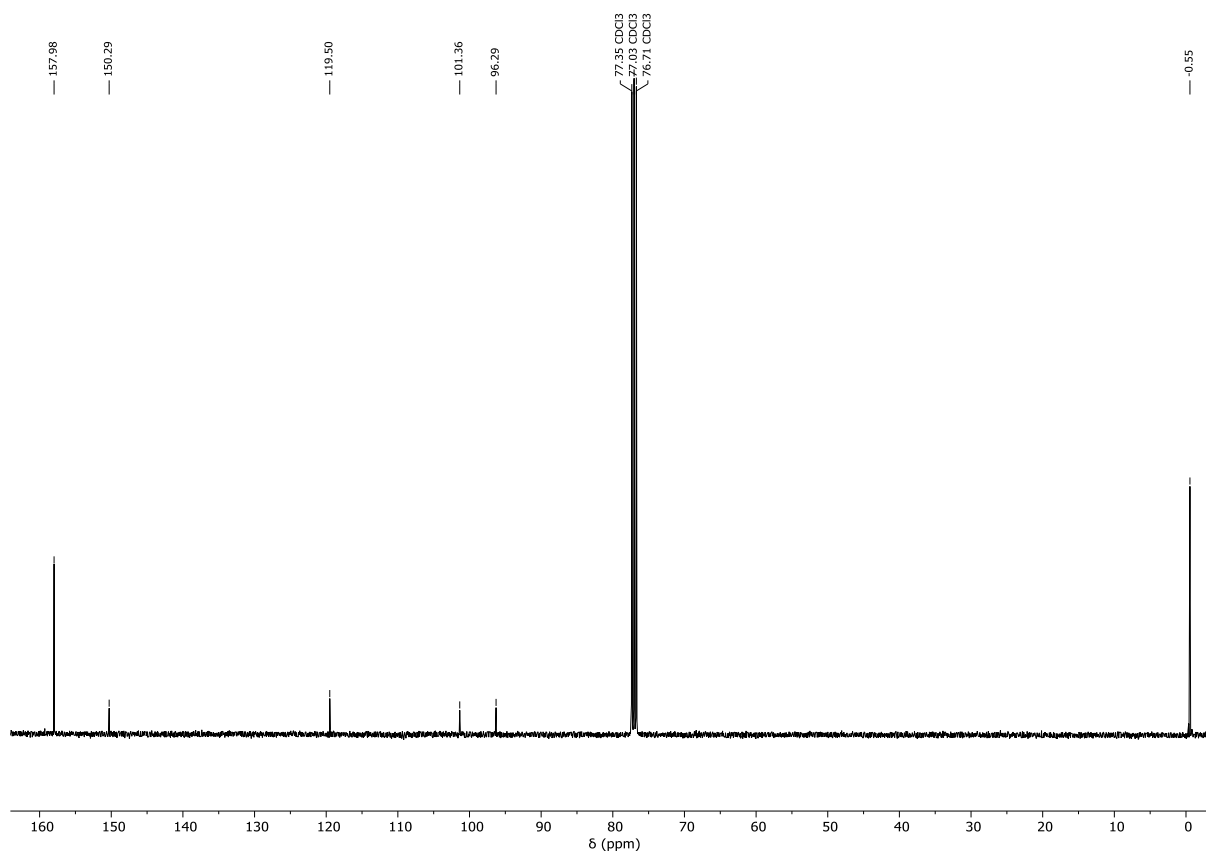

**Fig. 7.6:**  $^{13}\text{C-NMR}$  ( $\text{CDCl}_3$ , 400 MHz) of 5-Bromo-2-((trimethylsilyl)ethynyl) pyrimidine (TMSPym-Br).

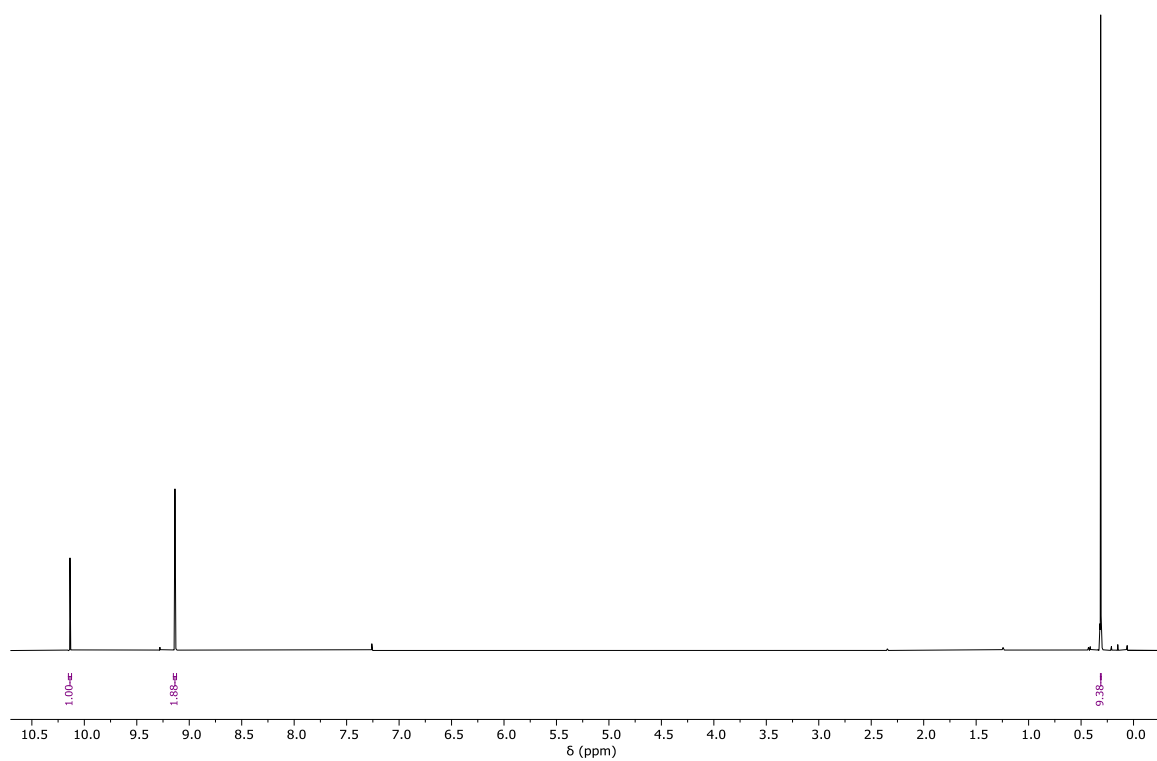

**Fig. 7.7:** <sup>1</sup>H-NMR (CDCl<sub>3</sub>, 400 MHz) of 2-(Ethynyl-adamantyl)-pyrimidine-5-carbaldehyde (AdPym-CHO).

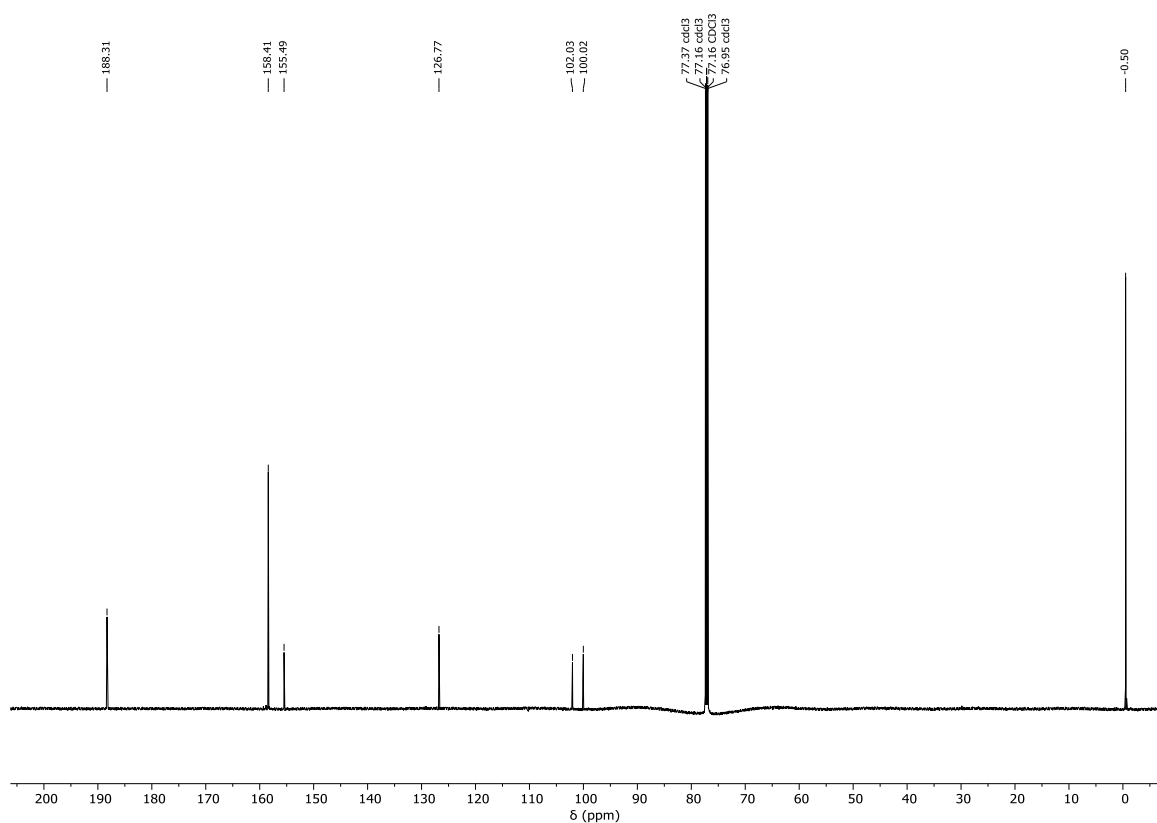

**Fig. 7.8:** <sup>13</sup>C-NMR (CDCl<sub>3</sub>, 400 MHz) of 2-(Ethynyl-adamantyl)-pyrimidine-5-carbaldehyde (AdPym-CHO).

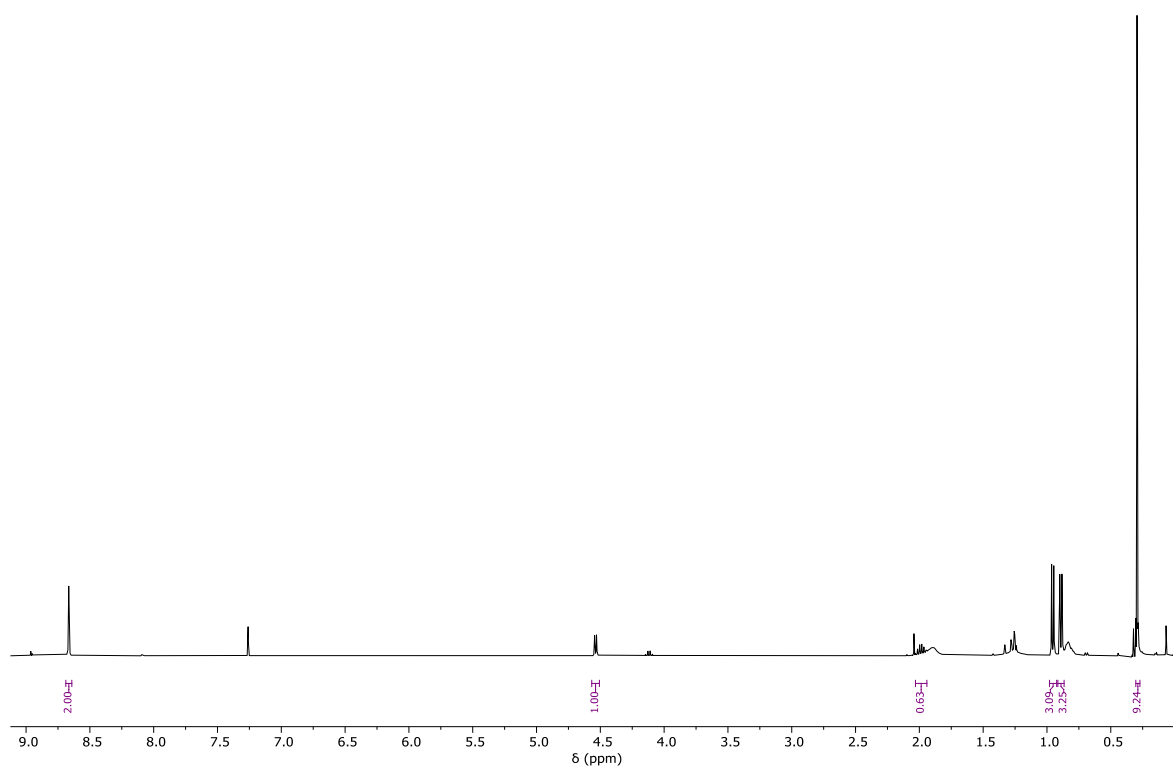

**Fig. 7.9:**  $^1\text{H}$ -NMR ( $\text{CDCl}_3$ , 400 MHz) of 2-Methyl-((2-trimethylsilylalkynyl)-5-pyrimidinyl)propanol (TMSPym-OH).

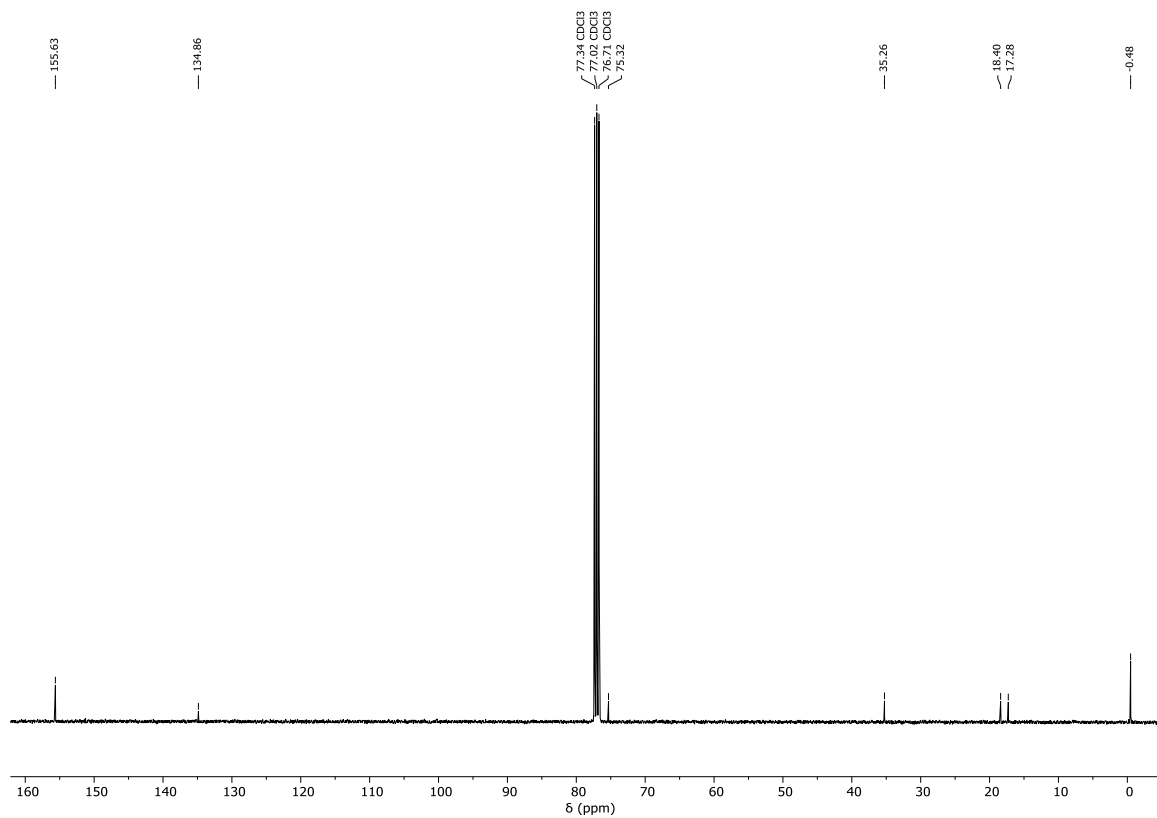

**Fig. 7.10:**  $^{13}\text{C}$ -NMR ( $\text{CDCl}_3$ , 400 MHz) of 2-Methyl-((2-trimethylsilylalkynyl)-5-pyrimidinyl)propanol (TMSPym-OH).

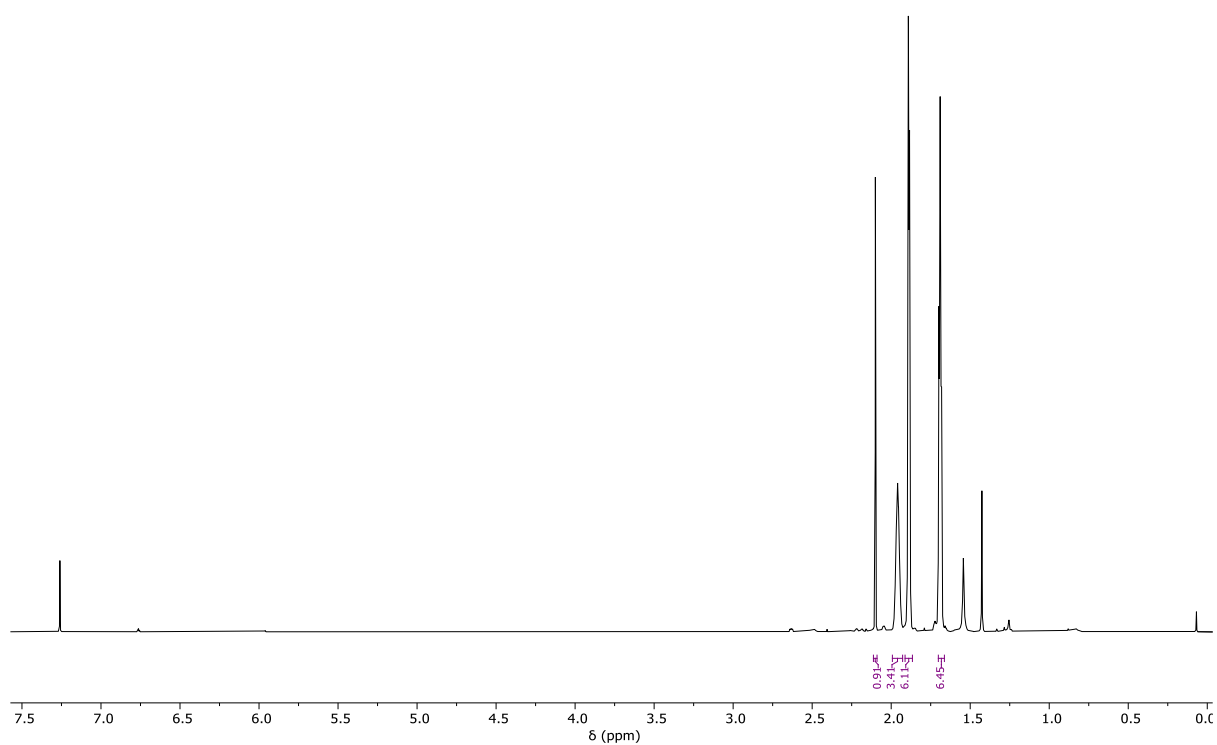

**Fig. 7.11:**  $^1\text{H}$ -NMR ( $\text{CDCl}_3$ , 400 MHz) of ethynyl adamantane.

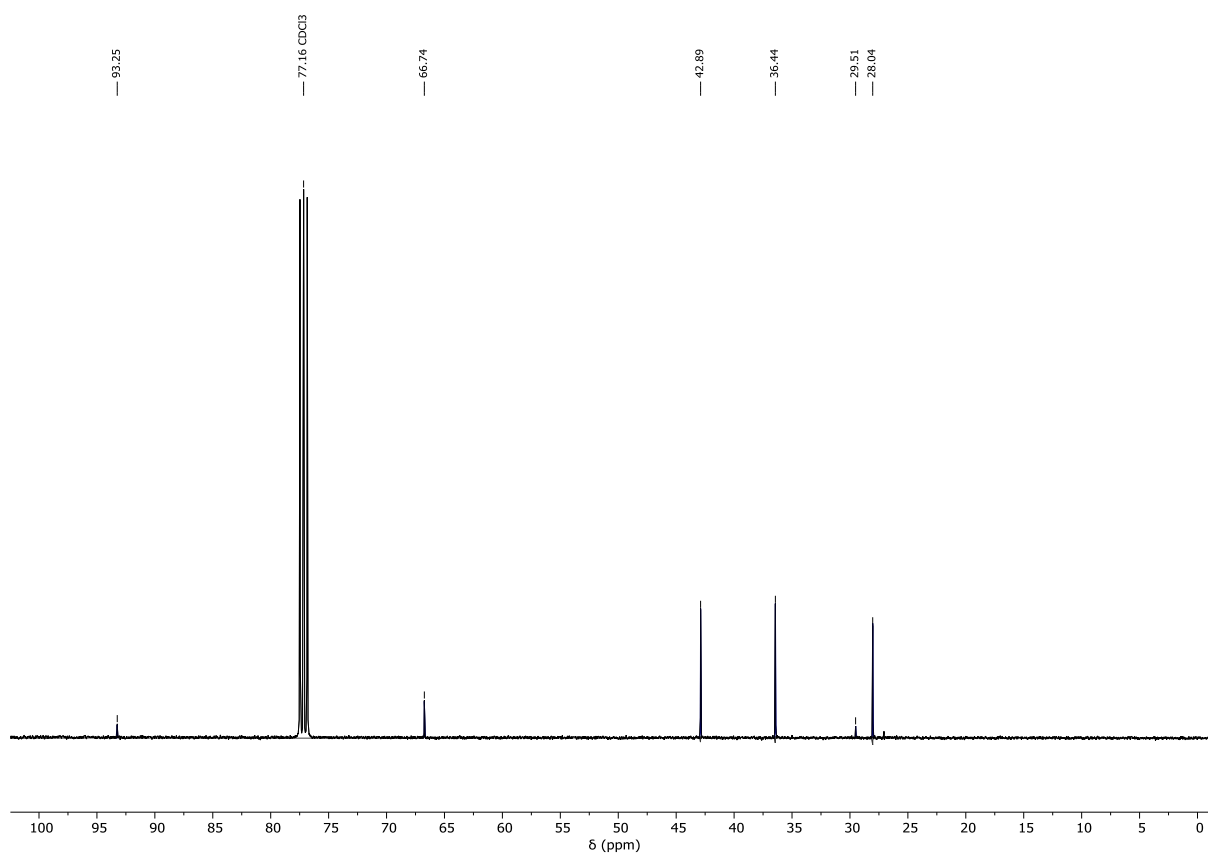

**Fig. 7.12:**  $^{13}\text{C}$ -NMR ( $\text{CDCl}_3$ , 400 MHz) of ethynyl adamantane.

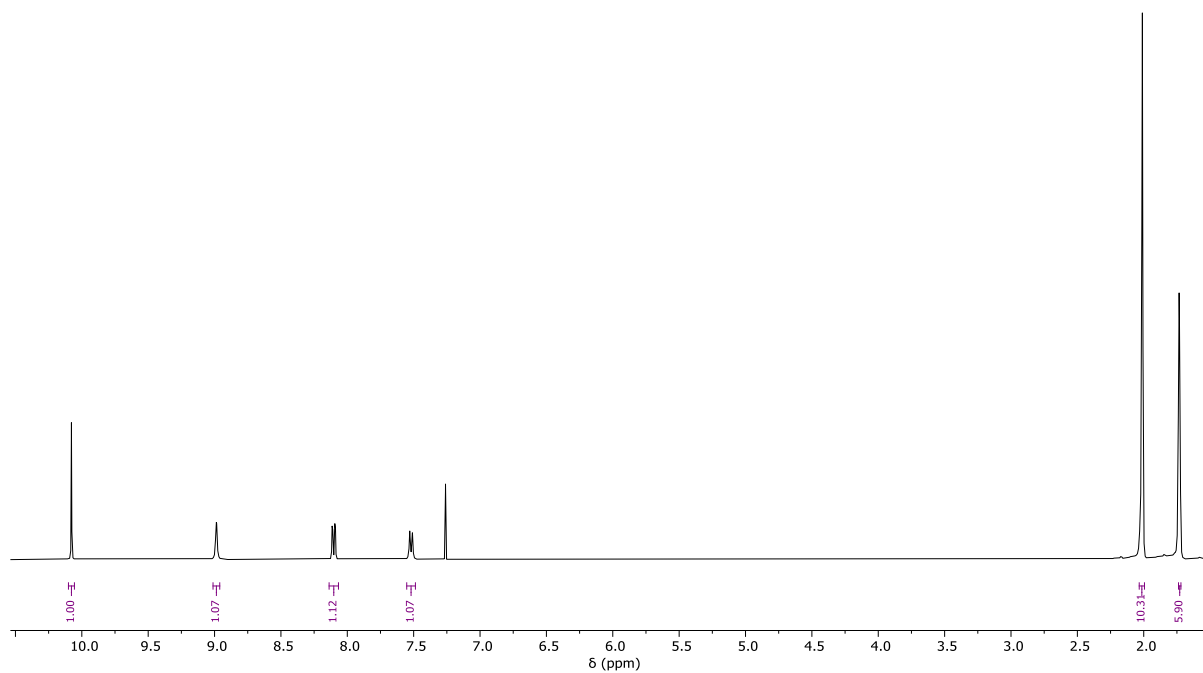

**Fig. 7.13:**  $^1\text{H}$ -NMR ( $\text{CDCl}_3$ , 400 MHz) of 6-((adamantan-1-yl)ethynyl)nicotinaldehyde (**AdPyr-CHO**).

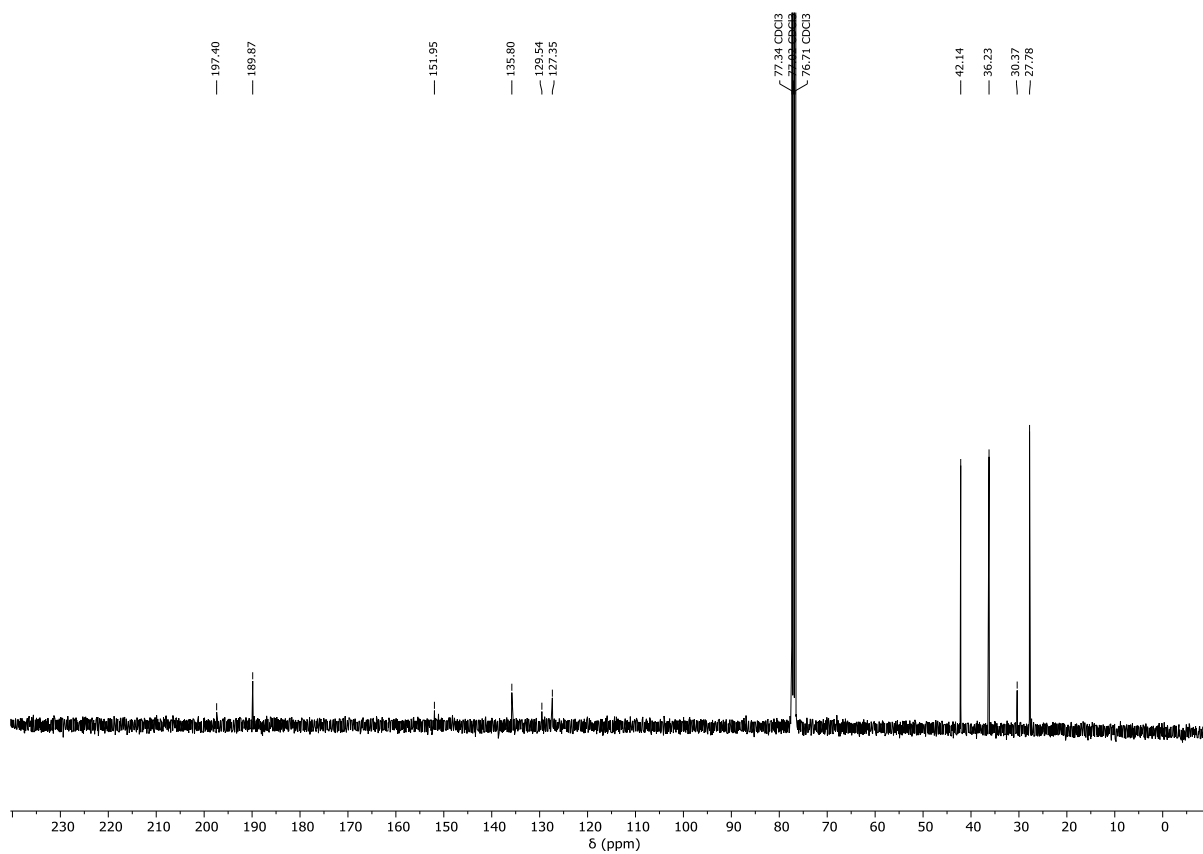

**Fig. 7.14:**  $^{13}\text{C}$ -NMR ( $\text{CDCl}_3$ , 400 MHz) of 6-((adamantan-1-yl)ethynyl)nicotinaldehyde (**AdPyr-CHO**).

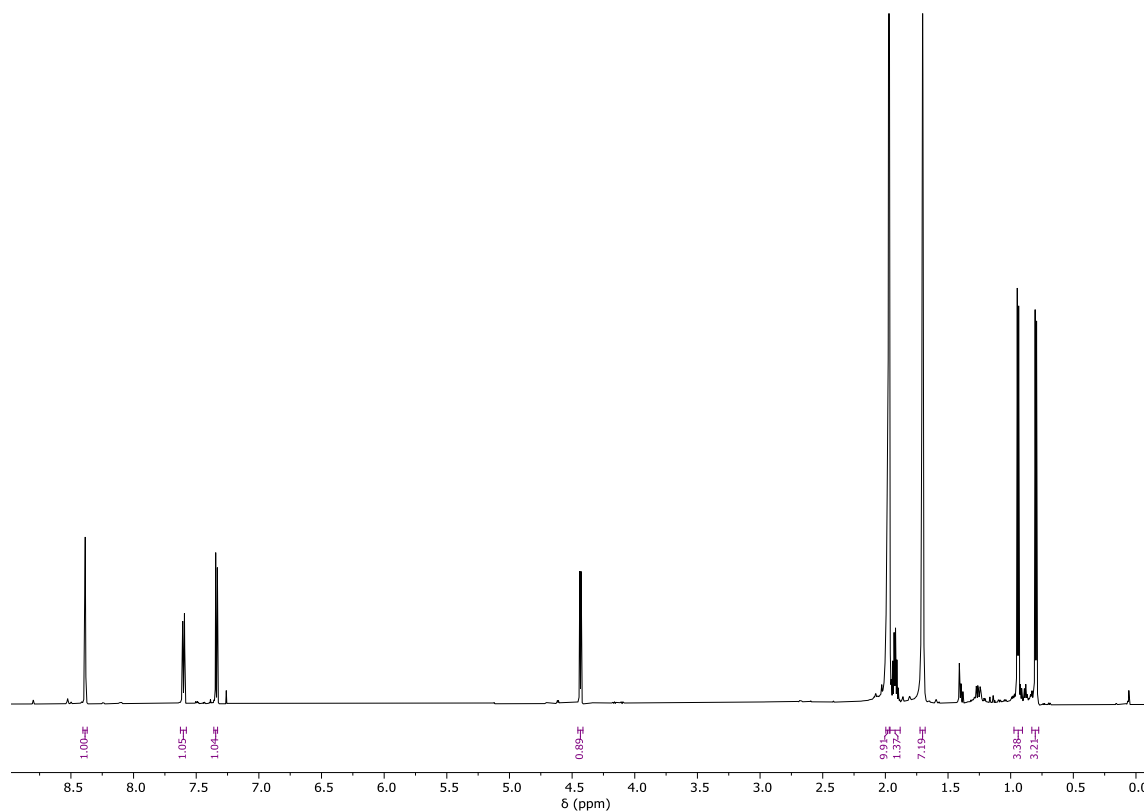

**Fig. 7.15:**  $^1\text{H}$ -NMR ( $\text{CDCl}_3$ , 400 MHz) of 2-Methyl-(6-((trimethylsilyl)ethynyl)pyridine-3-yl)propanol (TMSPyr-OH).

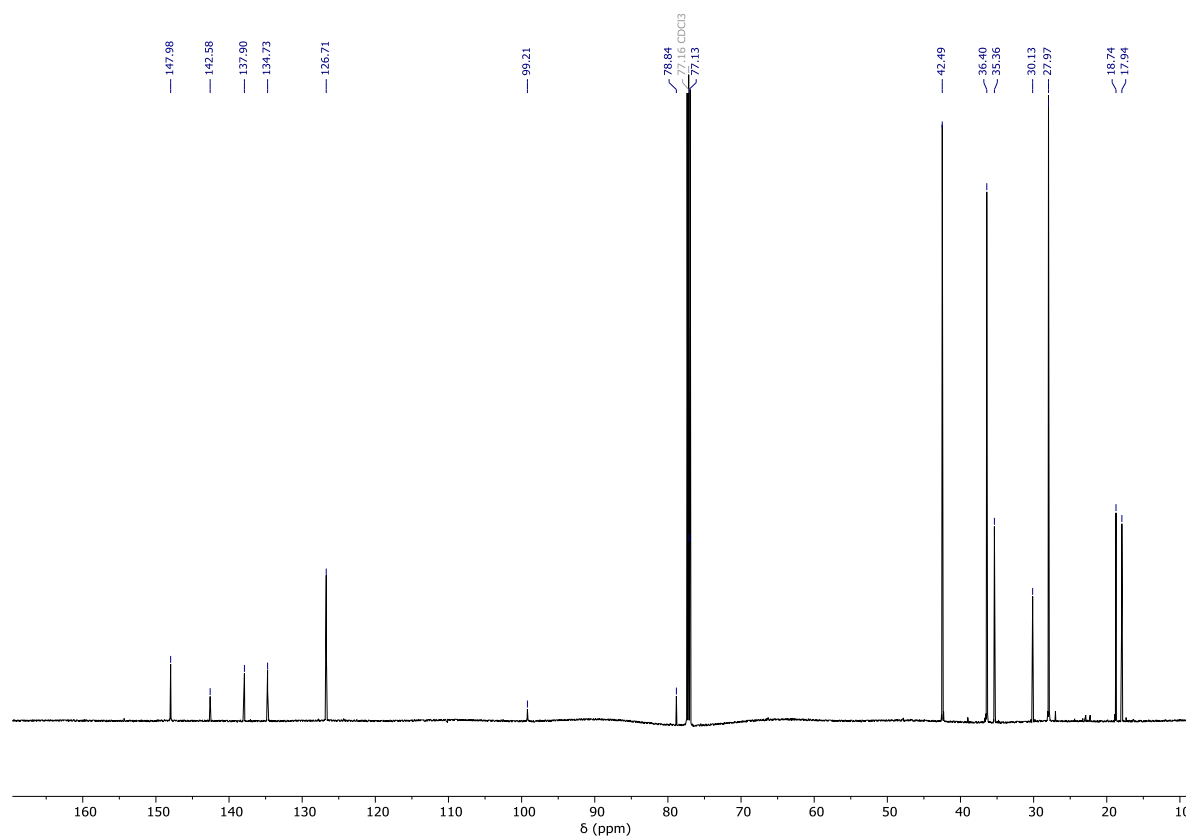

**Fig. 7.16:**  $^{13}\text{C}$ -NMR ( $\text{CDCl}_3$ , 400 MHz) of 2-Methyl-(6-((trimethylsilyl)ethynyl)pyridine-3-yl)propanol (TMSPyr-OH).

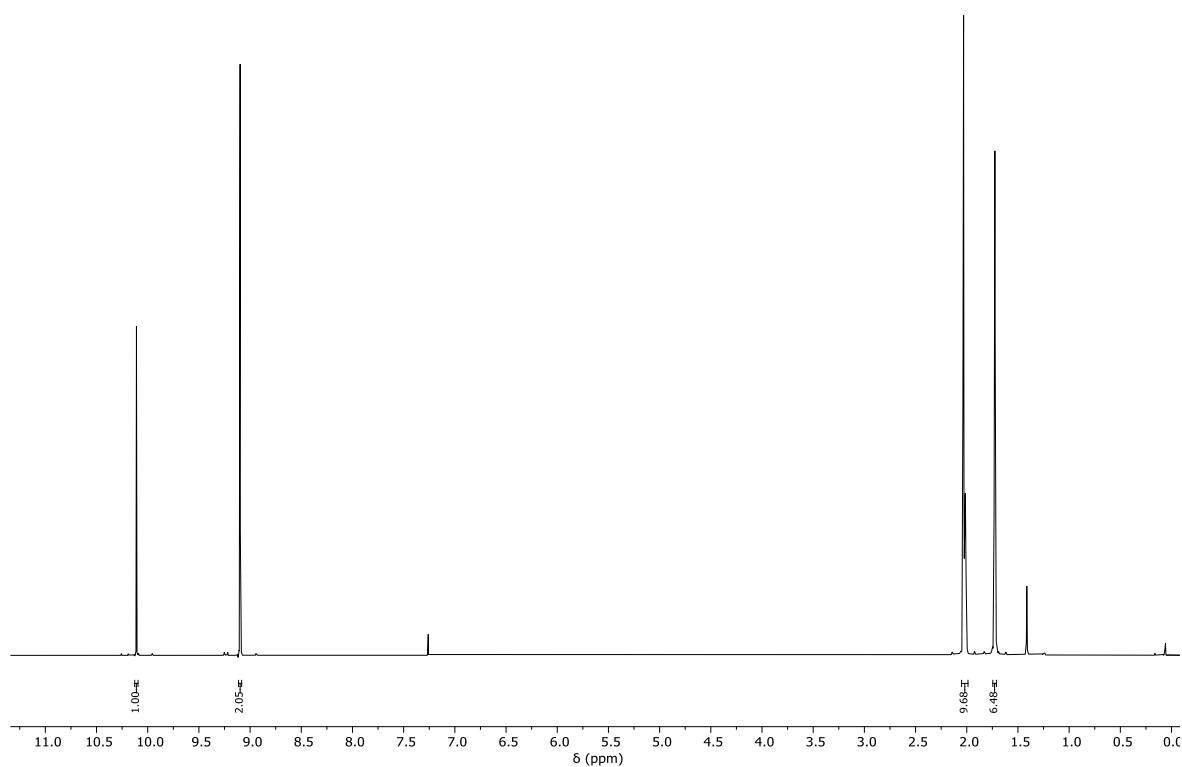

**Fig. 7.17:**  $^1\text{H}$ -NMR ( $\text{CDCl}_3$ , 400 MHz) of 2-(Ethynyl-adamantyl)-pyrimidine-5-carbaldehyde (**AdPym-CHO**).

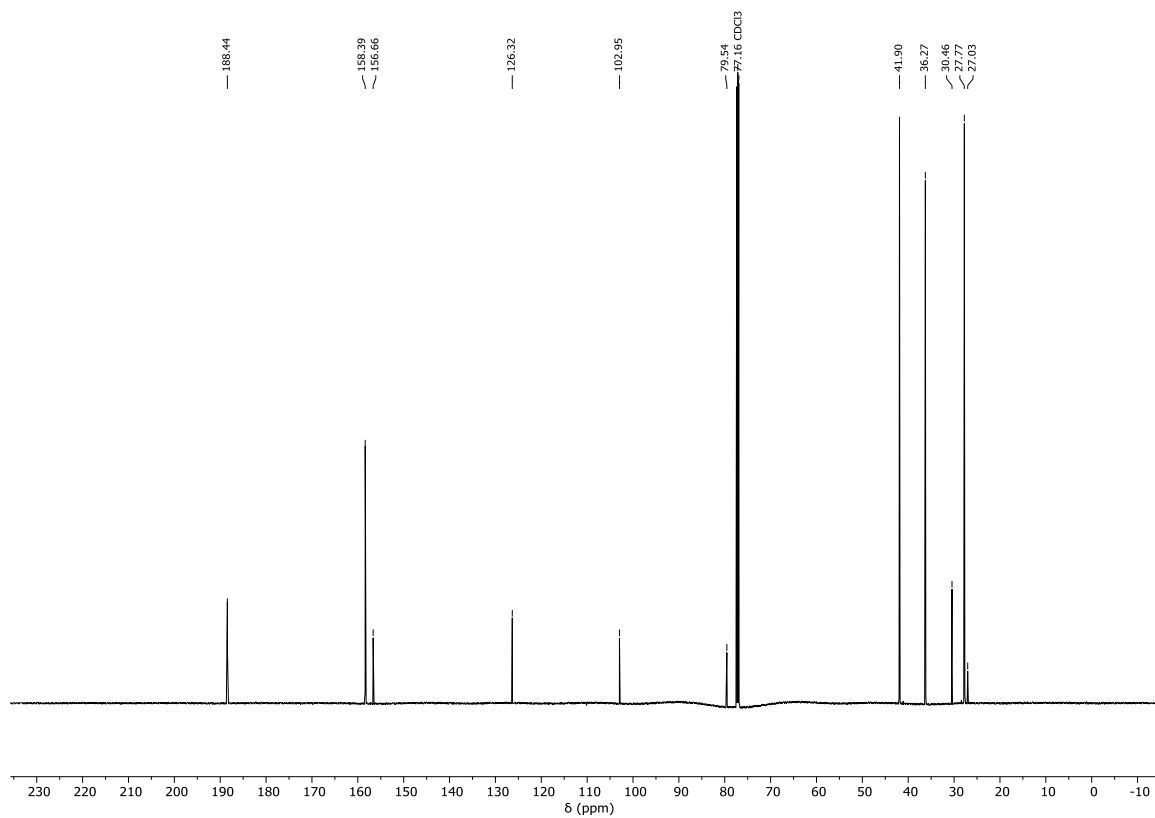

**Fig. 7.18:**  $^{13}\text{C}$ -NMR ( $\text{CDCl}_3$ , 400 MHz) of 2-(Ethynyl-adamantyl)-pyrimidine-5-carbaldehyde (**AdPym-CHO**).



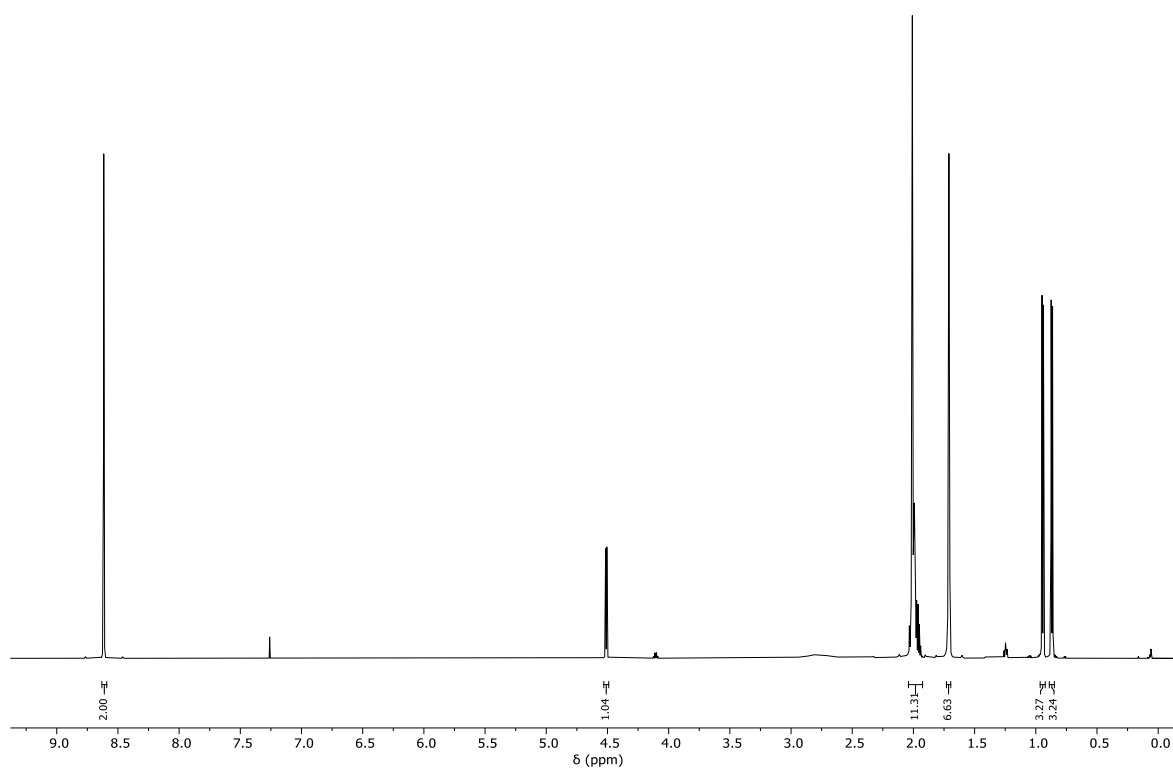

**Fig. 7.19:**  $^1\text{H-NMR}$  ( $\text{CDCl}_3$ , 400 MHz) of 2-Methyl-((2-adamantylalkynyl)-5-pyrimidyl)propanol (AdPym-OH).

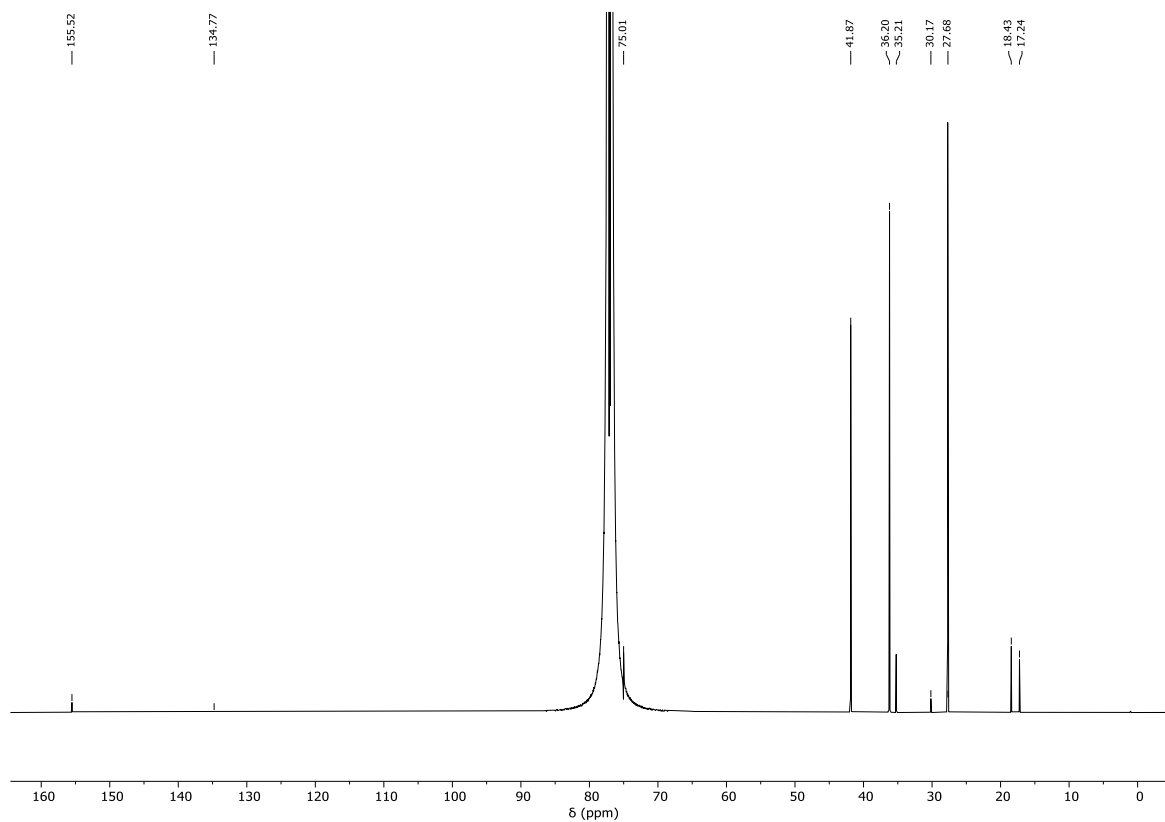

**Fig. 7.20:**  $^{13}\text{C-NMR}$  ( $\text{CDCl}_3$ , 400 MHz) of 2-Methyl-((2-adamantylalkynyl)-5-pyrimidyl)propanol (AdPym-OH).

## 8 References

1. Fulmer, G.R., et al., *NMR Chemical Shifts of Trace Impurities: Common Laboratory Solvents, Organics, and Gases in Deuterated Solvents Relevant to the Organometallic Chemist*. Organometallics, 2010. **29**(9): p. 2176-2179.
2. Romagnoli, C., B. Sieng, and M. Amedjkouh, *Asymmetric Amplification Coupling Enantioselective Autocatalysis and Asymmetric Induction for Alkylation of Azaaryl Aldehydes*. European Journal of Organic Chemistry, 2015. **2015**(19): p. 4087-4092.
3. Athavale, S.V., et al., *Demystifying the asymmetry-amplifying, autocatalytic behaviour of the Soai reaction through structural, mechanistic and computational studies*. Nature Chemistry, 2020. **12**(4): p. 412-423.
4. Athavale, S.V., et al., *Structural Contributions to Autocatalysis and Asymmetric Amplification in the Soai Reaction*. Journal of the American Chemical Society, 2020. **142**(43): p. 18387-18406.
5. Kenny, R.T. and F. Liu, *Robust and Scalable Synthesis of Soai Aldehydes via Improved Barbier-type Halogen–lithium Exchange*. Asian Journal of Organic Chemistry, 2022. **11**(7): p. e202100787.
6. Busch, M., et al., *Systematic Studies using 2-(1-Adamantylethynyl)pyrimidine-5-carbaldehyde as a Starting Material in Soai's Asymmetric Autocatalysis*. Chemistry – A European Journal, 2009. **15**(33): p. 8251-8258.
7. Trapp, O., et al., *In Situ Mass Spectrometric and Kinetic Investigations of Soai's Asymmetric Autocatalysis*. Chemistry – A European Journal, 2020. **26**(68): p. 15871-15880.
8. Trapp, O., *Unified Equation for Access to Rate Constants of First-Order Reactions in Dynamic and On-Column Reaction Chromatography*. Analytical Chemistry, 2006. **78**(1): p. 189-198.
9. Trapp, O., *A novel software tool for high throughput measurements of interconversion barriers: DCXplorer*. Journal of Chromatography B, 2008. **875**(1): p. 42-47.
10. Ebert, K.& Ederer, H. *Computeranwendungen in der Chemie* (VCH, Weinheim, 1985).
